# Supplementary material
Source: publisher figshare collection journal article supplement (https://acs.figshare.com/ndownloader/files/8532631)
Supplement: Supplementary file 1 [file 8532631]

# Bioactive Glycosides from the Twigs of *Litsea cubeba*

Ling-Yan Wang,<sup>†,‡</sup> Ming-Hua Chen,<sup>§,‡</sup> Jiang Wu,<sup>‡</sup> Hua Sun,<sup>†</sup> Wei Liu,<sup>†</sup> Yu-Hong Qu,<sup>†</sup> Yan-Cheng Li,<sup>†</sup>  
Yu-Zhuo Wu,<sup>†</sup> Rui Li,<sup>†</sup> Dan Zhang,<sup>†</sup> Su-Juan Wang,<sup>†</sup> and Sheng Lin<sup>\*,†</sup>

<sup>†</sup>*State Key Laboratory of Bioactive Substance and Function of Natural Medicines, Institute of Materia Medica, Chinese Academy of Medical Sciences and Peking Union Medical College, Beijing 100050, People's Republic of China*

<sup>§</sup>*Institute of Medicinal Biotechnology, Chinese Academy of Medical Sciences and Peking Union Medical College, Beijing 100050, People's Republic of China*

<sup>‡</sup>*College of Chemistry and Chemical Engineering, Lanzhou University, Lanzhou 730000, People's Republic of China*

## Supplementary Information

---

\* Corresponding authors. Tel: +86-10-83154789. E-mail: [lsznn@imm.ac.cn](mailto:lsznn@imm.ac.cn) (S. Lin)

## The List of Contents

| no. | Contents                                                                                                      | Page |
|-----|---------------------------------------------------------------------------------------------------------------|------|
| 1   | <b>Table S1.</b> Crystal data of and structure refinement for Compound <b>1a</b>                              | 6    |
| 2   | <b>Figure S1.</b> The UV Spectrum of Compound <b>1</b> in MeOH                                                | 7    |
| 3   | <b>Figure S2.</b> The ESIMS Spectrum of Compound <b>1</b>                                                     | 8    |
| 4   | <b>Figure S3.</b> The HRESIMS Spectrum of Compound <b>1</b>                                                   | 9    |
| 5   | <b>Figure S4.</b> The IR Spectrum of Compound <b>1</b>                                                        | 10   |
| 6   | <b>Figure S5.</b> The $^1\text{H}$ NMR Spectrum of Compound <b>1</b> in MeOH- $d_4$ (500MHz)                  | 11   |
| 7   | <b>Figure S6.</b> The $^{13}\text{C}$ NMR Spectrum of Compound <b>1</b> in MeOH- $d_4$ (125MHz)               | 12   |
| 8   | <b>Figure S7.</b> The $^1\text{H}$ - $^1\text{H}$ COSY Spectrum of Compound <b>1</b> in MeOH- $d_4$ (500MHz)  | 13   |
| 9   | <b>Figure S8.</b> The HSQC Spectrum of Compound <b>1</b> in MeOH- $d_4$ (500MHz)                              | 14   |
| 10  | <b>Figure S9.</b> The HMBC Spectrum of Compound <b>1</b> in MeOH- $d_4$ (500MHz)                              | 15   |
| 11  | <b>Figure S10.</b> The HRESIMS Spectrum of Compound <b>1a</b>                                                 | 16   |
| 12  | <b>Figure S11.</b> The $^1\text{H}$ NMR Spectrum of Compound <b>1a</b> in MeOH- $d_4$ (600MHz)                | 17   |
| 13  | <b>Figure S12.</b> The $^{13}\text{C}$ NMR Spectrum of Compound <b>1a</b> in MeOH- $d_4$ (150MHz)             | 18   |
| 14  | <b>Figure S13.</b> The UV Spectrum of Compound <b>2</b> in MeOH                                               | 19   |
| 15  | <b>Figure S14.</b> The CD Spectrum of Compound <b>2</b> in MeOH                                               | 20   |
| 16  | <b>Figure S15.</b> The HRESIMS Spectrum of Compound <b>2</b>                                                  | 21   |
| 17  | <b>Figure S16.</b> The IR Spectrum of Compound <b>2</b>                                                       | 22   |
| 18  | <b>Figure S17.</b> The $^1\text{H}$ NMR Spectrum of Compound <b>2</b> in MeOH- $d_4$ (500MHz)                 | 23   |
| 19  | <b>Figure S18.</b> The $^{13}\text{C}$ NMR Spectrum of Compound <b>2</b> in MeOH- $d_4$ (125MHz)              | 24   |
| 20  | <b>Figure S19.</b> The $^1\text{H}$ - $^1\text{H}$ COSY Spectrum of Compound <b>2</b> in MeOH- $d_4$ (500MHz) | 25   |
| 21  | <b>Figure S20.</b> The HSQC Spectrum of Compound <b>2</b> in MeOH- $d_4$ (500MHz)                             | 26   |
| 22  | <b>Figure S21.</b> The HMBC Spectrum of Compound <b>2</b> in MeOH- $d_4$ (500MHz)                             | 27   |
| 23  | <b>Figure S22.</b> The NOESY Spectrum of Compound <b>2</b> in MeOH- $d_4$ (500MHz)                            | 28   |
| 24  | <b>Figure S23.</b> The $^1\text{H}$ NMR spectrum of compound <b>2a</b> in MeOH- $d_4$ (600MHz)                | 29   |
| 25  | <b>Figure S24.</b> The $^{13}\text{C}$ NMR spectrum of compound <b>2a</b> in MeOH- $d_4$ (150MHz)             | 30   |
| 26  | <b>Figure S25.</b> The UV Spectrum of Compound <b>3</b> in MeOH                                               | 31   |
| 27  | <b>Figure S26.</b> The ESIMS Spectrum of Compound <b>3</b>                                                    | 32   |
| 28  | <b>Figure S27.</b> The HRESIMS Spectrum of Compound <b>3</b>                                                  | 33   |

|    |                                                                                                                  |    |
|----|------------------------------------------------------------------------------------------------------------------|----|
| 29 | <b>Figure S28.</b> The IR Spectrum of Compound <b>3</b>                                                          | 34 |
| 30 | <b>Figure S29.</b> The $^1\text{H}$ NMR Spectrum of Compound <b>3</b> in $\text{MeOH-}d_4$ (500MHz)              | 35 |
| 31 | <b>Figure S30.</b> The $^{13}\text{C}$ NMR Spectrum of Compound <b>3</b> in $\text{MeOH-}d_4$ (125MHz)           | 36 |
| 32 | <b>Figure S31.</b> The $^1\text{H-}^1\text{H}$ COSY Spectrum of Compound <b>3</b> in $\text{MeOH-}d_4$ (500MHz)  | 37 |
| 33 | <b>Figure S32.</b> The HSQC Spectrum of Compound <b>3</b> in $\text{MeOH-}d_4$ (500MHz)                          | 38 |
| 34 | <b>Figure S33.</b> The HMBC Spectrum of Compound <b>3</b> in $\text{MeOH-}d_4$ (500MHz)                          | 39 |
| 35 | <b>Figure S34.</b> The CD Spectrum of Compound <b>3a</b> in MeOH                                                 | 40 |
| 36 | <b>Figure S35.</b> The $^1\text{H}$ NMR Spectrum of Compound <b>3a</b> in $\text{MeOH-}d_4$ (500MHz)             | 41 |
| 37 | <b>Figure S36.</b> The $^{13}\text{C}$ NMR spectrum of compound <b>3a</b> in $\text{MeOH-}d_4$ (125MHz)          | 42 |
| 38 | <b>Figure S37.</b> The $^1\text{H-}^1\text{H}$ COSY Spectrum of Compound <b>3a</b> in $\text{MeOH-}d_4$ (500MHz) | 43 |
| 39 | <b>Figure S38.</b> The HSQC Spectrum of Compound <b>3a</b> in $\text{MeOH-}d_4$ (500MHz)                         | 44 |
| 40 | <b>Figure S39.</b> The HMBC Spectrum of Compound <b>3a</b> in $\text{MeOH-}d_4$ (500MHz)                         | 45 |
| 41 | <b>Figure S40.</b> The UV Spectrum of Compound <b>4</b> in MeOH                                                  | 46 |
| 42 | <b>Figure S41.</b> The CD Spectrum of Compound <b>4</b> in MeOH                                                  | 47 |
| 43 | <b>Figure S42.</b> The ESIMS Spectrum of Compound <b>4</b>                                                       | 48 |
| 44 | <b>Figure S43.</b> The HRESIMS Spectrum of Compound <b>4</b>                                                     | 49 |
| 45 | <b>Figure S44.</b> The IR Spectrum of Compound <b>4</b>                                                          | 50 |
| 46 | <b>Figure S45.</b> The $^1\text{H}$ NMR Spectrum of Compound <b>4</b> in $\text{MeOH-}d_4$ (500MHz)              | 51 |
| 47 | <b>Figure S46.</b> The $^{13}\text{C}$ NMR Spectrum of Compound <b>4</b> in $\text{MeOH-}d_4$ (125MHz)           | 52 |
| 48 | <b>Figure S47.</b> The DEPT NMR Spectrum of Compound <b>4</b> in $\text{MeOH-}d_4$ (125MHz)                      | 53 |
| 49 | <b>Figure S48.</b> The $^1\text{H-}^1\text{H}$ COSY Spectrum of Compound <b>4</b> in $\text{MeOH-}d_4$ (500MHz)  | 54 |
| 50 | <b>Figure S49.</b> The HSQC Spectrum of Compound <b>4</b> in $\text{MeOH-}d_4$ (500MHz)                          | 55 |
| 51 | <b>Figure S50.</b> The HMBC Spectrum of Compound <b>4</b> in $\text{MeOH-}d_4$ (500MHz)                          | 56 |
| 52 | <b>Figure S51.</b> The UV Spectrum of Compound <b>5</b> in MeOH                                                  | 57 |
| 53 | <b>Figure S52.</b> The CD spectrum of compound <b>5</b> in MeOH                                                  | 58 |
| 54 | <b>Figure S53.</b> The ESIMS Spectrum of Compound <b>5</b>                                                       | 59 |
| 55 | <b>Figure S54.</b> The HR ESIMS Spectrum of Compound <b>5</b>                                                    | 60 |
| 56 | <b>Figure S55.</b> The IR Spectrum of Compound <b>5</b>                                                          | 61 |
| 57 | <b>Figure S56.</b> The $^1\text{H}$ NMR Spectrum of Compound <b>5</b> in $\text{MeOH-}d_4$ (600MHz)              | 62 |
| 58 | <b>Figure S57.</b> The $^{13}\text{C}$ NMR Spectrum of Compound <b>5</b> in $\text{MeOH-}d_4$ (150MHz)           | 63 |
| 59 | <b>Figure S58.</b> The $^1\text{H-}^1\text{H}$ COSY Spectrum of Compound <b>5</b> in $\text{MeOH-}d_4$ (600MHz)  | 64 |

|    |                                                                                                                                  |    |
|----|----------------------------------------------------------------------------------------------------------------------------------|----|
| 60 | <b>Figure S59.</b> The HSQC Spectrum of Compound <b>5</b> in MeOH- <i>d</i> <sub>4</sub> (600MHz)                                | 65 |
| 61 | <b>Figure S60.</b> The HMBC Spectrum of Compound <b>5</b> in MeOH- <i>d</i> <sub>4</sub> (600MHz)                                | 66 |
| 62 | <b>Figure S61.</b> The UV Spectrum of Compound <b>6</b> in MeOH                                                                  | 67 |
| 63 | <b>Figure S62.</b> The CD spectrum of compound <b>6</b> in MeOH                                                                  | 68 |
| 64 | <b>Figure S63.</b> The ESIMS Spectrum of Compound <b>6</b>                                                                       | 69 |
| 65 | <b>Figure S64.</b> The HRESIMS Spectrum of Compound <b>6</b>                                                                     | 70 |
| 66 | <b>Figure S65.</b> The IR Spectrum of Compound <b>6</b>                                                                          | 71 |
| 67 | <b>Figure S66.</b> The <sup>1</sup> H NMR Spectrum of Compound <b>6</b> in MeOH- <i>d</i> <sub>4</sub> (600MHz)                  | 72 |
| 68 | <b>Figure S67.</b> The <sup>13</sup> C NMR Spectrum of Compound <b>6</b> in MeOH- <i>d</i> <sub>4</sub> (150MHz)                 | 73 |
| 69 | <b>Figure S68.</b> The <sup>1</sup> H- <sup>1</sup> H COSY Spectrum of Compound <b>6</b> in MeOH- <i>d</i> <sub>4</sub> (600MHz) | 74 |
| 70 | <b>Figure S69.</b> The HSQC Spectrum of Compound <b>6</b> in MeOH- <i>d</i> <sub>4</sub> (600MHz)                                | 75 |
| 71 | <b>Figure S70.</b> The HMBC Spectrum of Compound <b>6</b> in MeOH- <i>d</i> <sub>4</sub> (600MHz)                                | 76 |
| 72 | <b>Figure S71.</b> The NOESY Spectrum of Compound <b>6</b> in MeOH- <i>d</i> <sub>4</sub> (600MHz)                               | 77 |
| 73 | <b>Figure S72.</b> The UV Spectra of Compound <b>7</b> in MeOH                                                                   | 78 |
| 74 | <b>Figure S73.</b> The CD Spectrum of Compound <b>7</b> in MeOH                                                                  | 79 |
| 75 | <b>Figure S74.</b> The ESIMS Spectrum of Compound <b>7</b>                                                                       | 80 |
| 76 | <b>Figure S75.</b> The HRESIMS Spectrum of Compound <b>7</b>                                                                     | 81 |
| 77 | <b>Figure S76.</b> The IR Spectrum of Compound <b>7</b>                                                                          | 82 |
| 78 | <b>Figure S77.</b> The <sup>1</sup> H NMR Spectrum of Compound <b>7</b> in MeOH- <i>d</i> <sub>4</sub> (600MHz)                  | 83 |
| 79 | <b>Figure S78.</b> The <sup>13</sup> C NMR Spectrum of Compound <b>7</b> in MeOH- <i>d</i> <sub>4</sub> (150MHz)                 | 84 |
| 80 | <b>Figure S79.</b> The <sup>1</sup> H- <sup>1</sup> H COSY Spectrum of Compound <b>7</b> in MeOH- <i>d</i> <sub>4</sub> (600MHz) | 85 |
| 81 | <b>Figure S80.</b> The HSQC Spectrum of Compound <b>7</b> in MeOH- <i>d</i> <sub>4</sub> (600MHz)                                | 86 |
| 82 | <b>Figure S81.</b> The HMBC Spectrum of Compound <b>7</b> in MeOH- <i>d</i> <sub>4</sub> (600MHz)                                | 87 |
| 83 | <b>Figure S82.</b> The NOESY Spectrum of Compound <b>7</b> in MeOH- <i>d</i> <sub>4</sub> (600MHz)                               | 88 |
| 84 | <b>Figure S83.</b> The UV Spectrum of Compound <b>8</b> in MeOH                                                                  | 89 |
| 85 | <b>Figure S84.</b> The ESIMS Spectrum of Compound <b>8</b>                                                                       | 90 |
| 86 | <b>Figure S85.</b> The HR ESIMS Spectrum of Compound <b>8</b>                                                                    | 91 |
| 87 | <b>Figure S86.</b> The IR Spectrum of Compound <b>8</b>                                                                          | 92 |
| 88 | <b>Figure S87.</b> The <sup>1</sup> H NMR Spectrum of Compound <b>8</b> in MeOH- <i>d</i> <sub>4</sub> (500MHz)                  | 93 |
| 89 | <b>Figure S88.</b> The <sup>13</sup> C NMR Spectrum of Compound <b>8</b> in MeOH- <i>d</i> <sub>4</sub> (125MHz)                 | 94 |
| 90 | <b>Figure S89.</b> The <sup>1</sup> H- <sup>1</sup> H COSY Spectrum of Compound <b>8</b> in MeOH- <i>d</i> <sub>4</sub> (500MHz) | 95 |

|     |                                                                                                                                    |     |
|-----|------------------------------------------------------------------------------------------------------------------------------------|-----|
| 91  | <b>Figure S90.</b> The HSQC Spectrum of Compound <b>8</b> in MeOH- <i>d</i> <sub>4</sub> (500MHz)                                  | 96  |
| 92  | <b>Figure S91.</b> The HMBC Spectrum of Compound <b>8</b> in MeOH- <i>d</i> <sub>4</sub> (500MHz)                                  | 97  |
| 93  | <b>Figure S92.</b> The UV Spectrum of Compound <b>9</b> in MeOH                                                                    | 98  |
| 94  | <b>Figure S93.</b> The ESIMS Spectrum of Compound <b>9</b>                                                                         | 99  |
| 95  | <b>Figure S94.</b> The HRESIMS Spectrum of Compound <b>9</b>                                                                       | 100 |
| 96  | <b>Figure S95.</b> The IR Spectrum of Compound <b>9</b>                                                                            | 101 |
| 97  | <b>Figure S96.</b> The <sup>1</sup> H NMR Spectrum of Compound <b>9</b> in MeOH- <i>d</i> <sub>4</sub> (600MHz)                    | 102 |
| 98  | <b>Figure S97.</b> The <sup>13</sup> C NMR Spectrum of Compound <b>9</b> in MeOH- <i>d</i> <sub>4</sub> (150MHz)                   | 103 |
| 99  | <b>Figure S98.</b> The <sup>1</sup> H- <sup>1</sup> H COSY Spectrum of Compound <b>9</b> in MeOH- <i>d</i> <sub>4</sub> (600MHz)   | 104 |
| 100 | <b>Figure S99.</b> The HSQC Spectrum of Compound <b>9</b> in MeOH- <i>d</i> <sub>4</sub> (600MHz)                                  | 105 |
| 101 | <b>Figure S100.</b> The HMBC Spectrum of Compound <b>9</b> in MeOH- <i>d</i> <sub>4</sub> (600MHz)                                 | 106 |
| 102 | <b>Figure S101.</b> The UV Spectrum of Compound <b>10</b> in MeOH                                                                  | 107 |
| 103 | <b>Figure S102.</b> The HRESIMS Spectrum of Compound <b>10</b>                                                                     | 108 |
| 104 | <b>Figure S103.</b> The IR Spectrum of Compound <b>10</b>                                                                          | 109 |
| 105 | <b>Figure S104.</b> The <sup>1</sup> H NMR Spectrum of Compound <b>10</b> in MeOH- <i>d</i> <sub>4</sub> (500MHz)                  | 110 |
| 106 | <b>Figure S105.</b> The <sup>13</sup> C NMR spectrum of compound <b>10</b> in MeOH- <i>d</i> <sub>4</sub> (125MHz)                 | 111 |
| 107 | <b>Figure S106.</b> The <sup>1</sup> H- <sup>1</sup> H COSY Spectrum of Compound <b>10</b> in MeOH- <i>d</i> <sub>4</sub> (500MHz) | 112 |
| 108 | <b>Figure S107.</b> The HSQC Spectrum of Compound <b>10</b> in MeOH- <i>d</i> <sub>4</sub> (500MHz)                                | 113 |
| 109 | <b>Figure S108.</b> The HMBC Spectrum of Compound <b>10</b> in MeOH- <i>d</i> <sub>4</sub> (500MHz)                                | 114 |
| 110 | <b>Figure S109.</b> The NOE Difference Spectrum of Compound <b>10</b> in MeOH- <i>d</i> <sub>4</sub> (500MHz)                      | 115 |

**Table S1.** Crystal data of and structure refinement for Compound **1a**

|                                   |                                                                                        |
|-----------------------------------|----------------------------------------------------------------------------------------|
| Empirical formula                 | C <sub>10</sub> H <sub>18</sub> O <sub>4</sub>                                         |
| Formula weight                    | 202.24                                                                                 |
| Temperature                       | 104.2 K                                                                                |
| Wavelength                        | 1.5418 Å                                                                               |
| Crystal system                    | Orthorhombic                                                                           |
| space group                       | P2 <sub>1</sub> 2 <sub>1</sub> 2                                                       |
| Unit cell dimensions              | a=19.2960(8) Å    α = 90 °<br>b= 8.0943(4) Å    β = 90 °<br>c= 6.9478(3) Å    γ = 90 ° |
| Volume                            | 1085.15(9) Å <sup>3</sup>                                                              |
| Z                                 | 4                                                                                      |
| Calculated density                | 1.238 Mg/m <sup>3</sup>                                                                |
| Absorption coefficient            | 0.784 mm <sup>-1</sup>                                                                 |
| F(000)                            | 440                                                                                    |
| Crystal size                      | 0.55 × 0.25 × 0.06 mm <sup>3</sup>                                                     |
| Theta range for data collection   | 9.16 to 142.22 °                                                                       |
| Limiting indices                  | -23 ≤ h ≤ 20<br>-9 ≤ k ≤ 8<br>-8 ≤ l ≤ 8                                               |
| Reflections collected / unique    | 3546/2042 [R(int) = 0.0248]                                                            |
| Completeness                      | 0.982                                                                                  |
| Data / restraints / parameters    | 2042/0/133                                                                             |
| Goodness-of-fit on F <sup>2</sup> | 1.066                                                                                  |
| Final R indices [I > 2σ(I)]       | R <sub>1</sub> = 0.0349, wR <sub>2</sub> = 0.0907                                      |
| R indices (all data)              | R <sub>1</sub> = 0.0371, wR <sub>2</sub> = 0.0931                                      |
| Absolute structure parameter      | 0.0 (2)                                                                                |

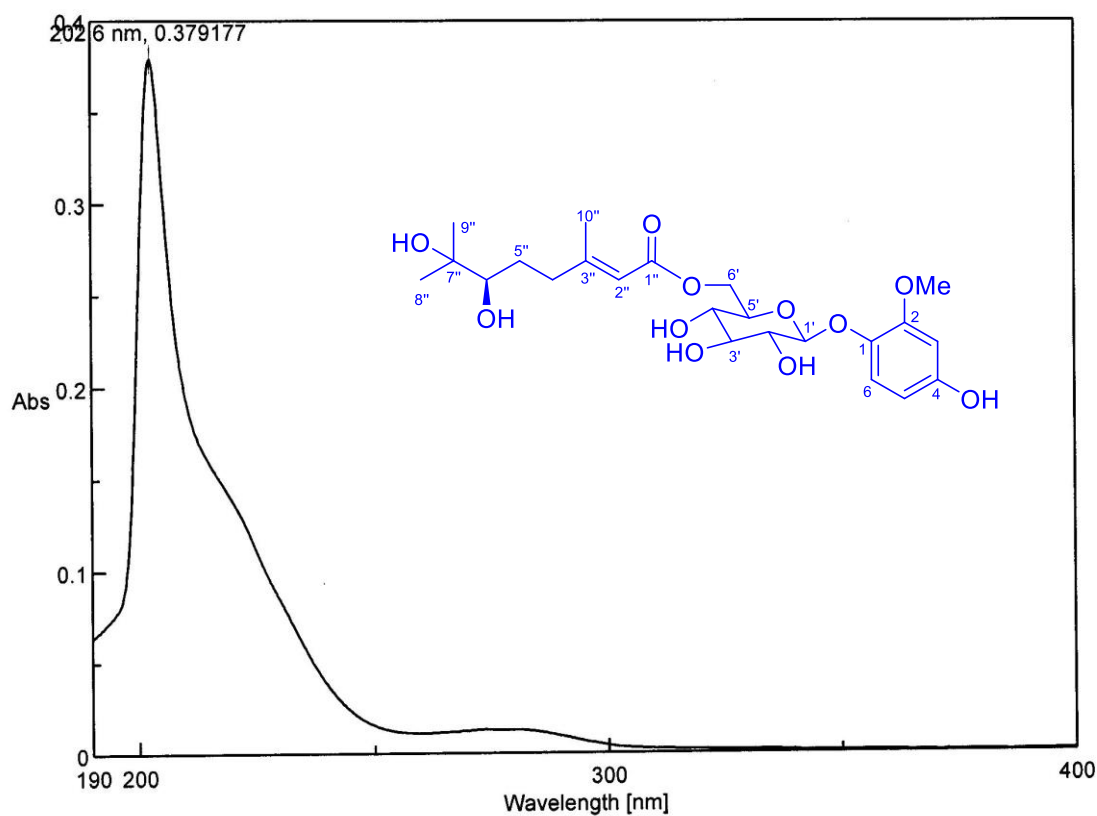

[Comment]  
 Sample Name QYH-26  
 Comment 0.02  
 User  
 Division UV  
 Company 324  
 [Measurement Information]  
 Instrument Name V-650  
 Model Name V-650  
 Serial No. A034461150

Accessory PSC-718  
 Accessory S/N A001761114  
 Position 1  
 Cell Length 10 mm  
 Temperature 19.95 C  
 Control Sensor Holder  
 Monitor Sensor Holder  
 Start Mode Start immediately

Photometric Mode Abs  
 Measurement range 400 - 190 nm  
 Data pitch 0.2 nm  
 Band width(UV/Vis) 2.0 nm  
 Response Medium  
 Scanning speed 200 nm/min  
 Source Change 340 nm  
 Light Source D2/WI  
 Filter Exchange Step  
 Correction Baseline

[Data Information]  
 Creation Date 2014-7-15 21:15

Data array type Linear data array  
 Horizontal Wavelength [nm]  
 Vertical Abs  
 Start 400 nm  
 End 190 nm  
 Data pitch 0.2 nm  
 Data points 1051

**Figure S1. The UV Spectrum of Compound 1 in MeOH**

# Single Mass Spectrum Deconvolution Report

**Analysis Name:** linsh231.d

**Method:** TEST.MS

**Sample Name:** QYH-26

**Analysis Info:**

**Instrument:** LC-MSD-TraP-SL

**Operator:** Operator

**Print Date:** 3/25/2014 2:55:32 PM

**Acq. Date:** 3/25/2014 2:45:01 PM

**Acquisition Parameter:**

Mass Range Mode      Std/Normal

|              |          |
|--------------|----------|
| Ion Polarity | Positive |
|--------------|----------|

Ion Source Type

Dry Temp (Set)

Nebulizer (Set)

Dry Gas (Set)

### Trap Drive

Octopole RF Amplitude

### Capillary Exit

Skimmer

Oct 1 DC

Oct 2 DC

45.5

152.8 V<sub>pp</sub>

-102.3 Volt

-40.0 Volt

-12.00 Volt

-1.70 Volt

Scan Begin

Scan End

### Averages

Max. Accu

ICC Target

Charge Cor

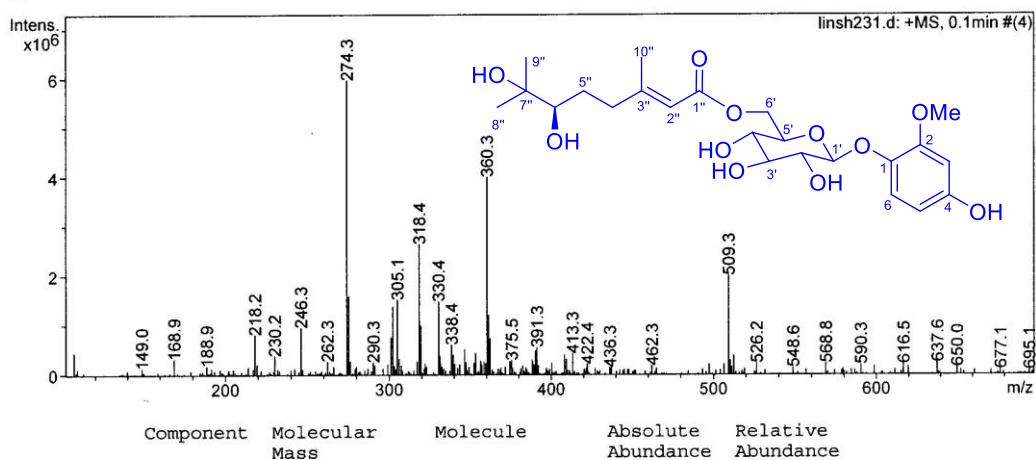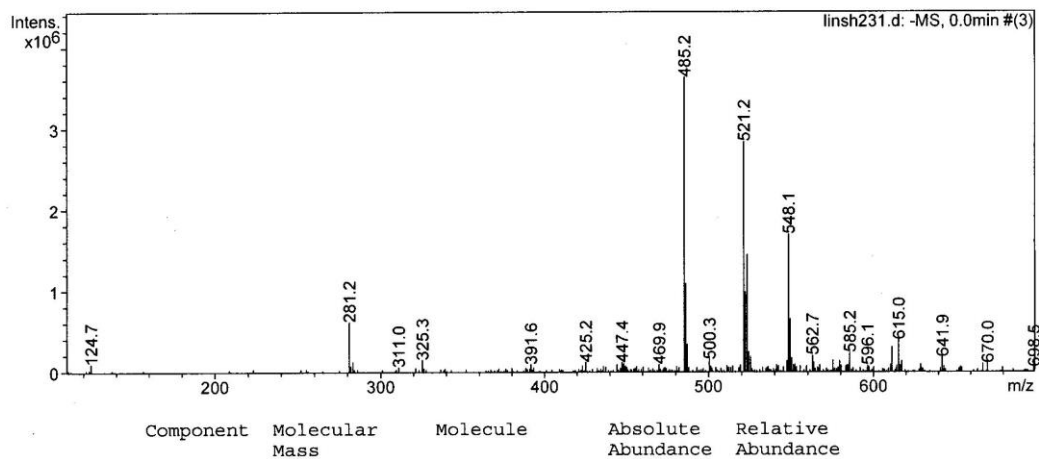

**Figure S2. The ESIMS Spectrum of Compound 1**

## Qualitative Analysis Report

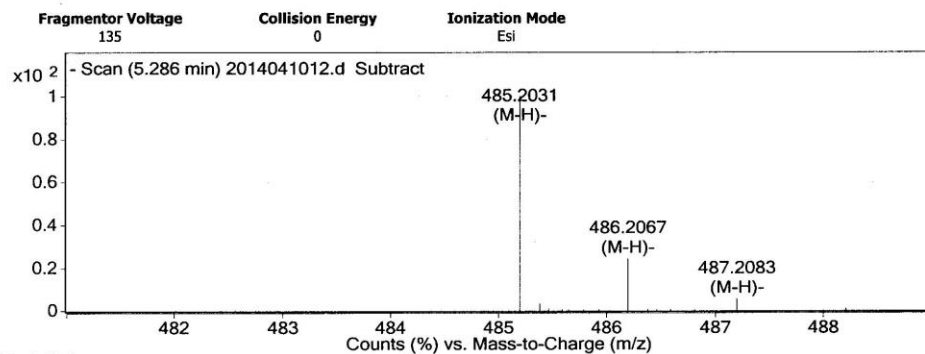

### Peak List

| m/z       | z | Abund  | Formula     | Ion    |
|-----------|---|--------|-------------|--------|
| 248.9603  |   | 27511  |             |        |
| 384.9357  |   | 25747  |             |        |
| 485.2031  | 1 | 349415 | C23 H33 O11 | (M-H)- |
| 486.2067  | 1 | 85909  | C23 H33 O11 | (M-H)- |
| 520.9102  |   | 81085  |             |        |
| 553.1896  |   | 45205  |             |        |
| 656.8851  |   | 38193  |             |        |
| 792.8584  |   | 25958  |             |        |
| 966.0001  |   | 34307  |             |        |
| 1033.9882 |   | 45086  |             |        |

### Formula Calculator Element Limits

| Element | Min | Max |
|---------|-----|-----|
| C       | 3   | 100 |
| H       | 0   | 500 |
| O       | 0   | 90  |
| N       | 0   | 5   |
| S       | 0   | 0   |
| Cl      | 0   | 0   |
| Br      | 0   | 0   |
| Si      | 0   | 0   |
| F       | 0   | 0   |
| P       | 0   | 0   |

### Formula Calculator Results

| Formula       | Best | Mass     | Tgt Mass | Diff (ppm) | Ion Species   | Score |
|---------------|------|----------|----------|------------|---------------|-------|
| C23 H34 O11   | TRUE | 486.2104 | 486.2101 | -0.62      | C23 H33 O11   | 99.94 |
| C24 H30 N4 O7 |      | 486.2104 | 486.2114 | 2.12       | C24 H29 N4 O7 | 99.61 |

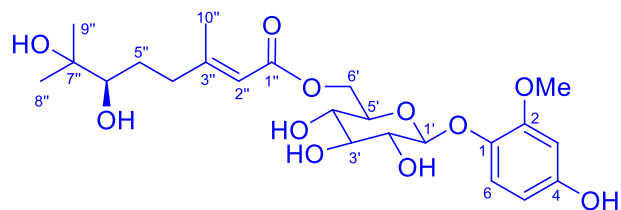

--- End Of Report ---

**Figure S3. The HRESIMS Spectrum of Compound 1**

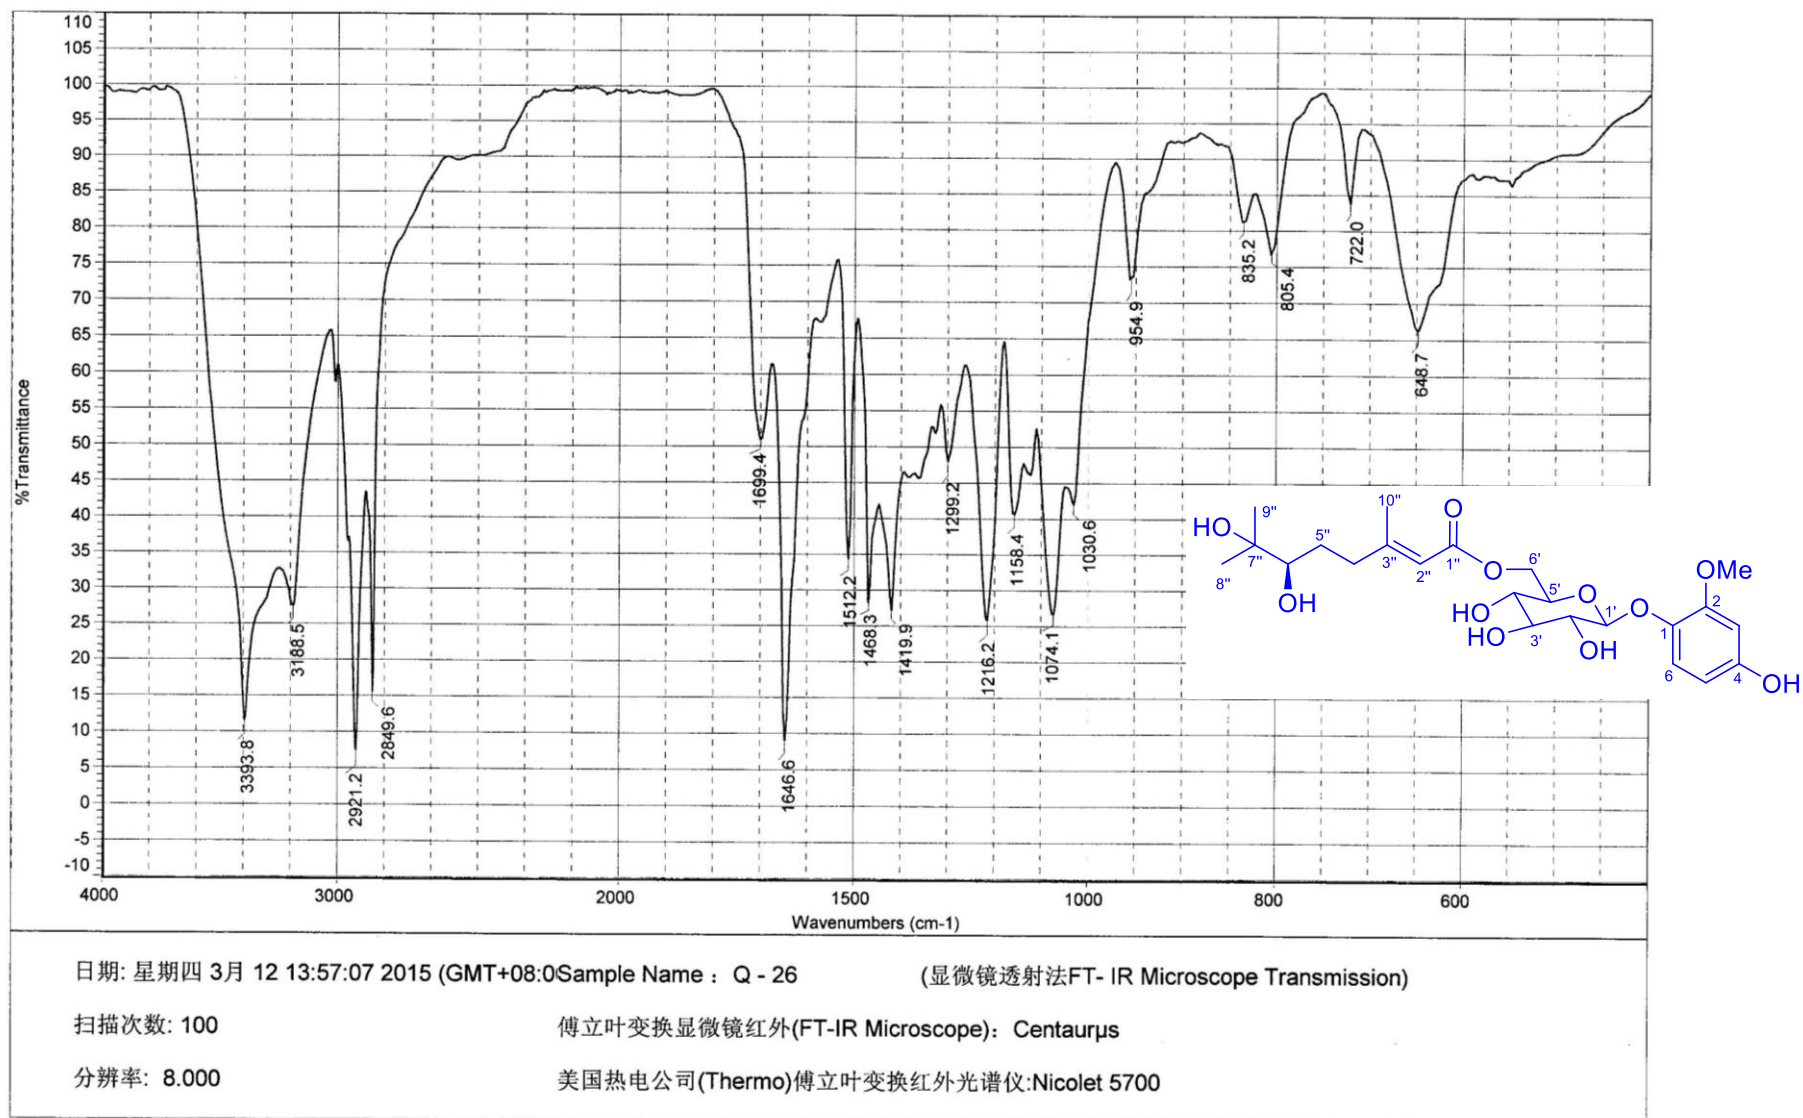

**Figure S4. The IR Spectrum of Compound 1**

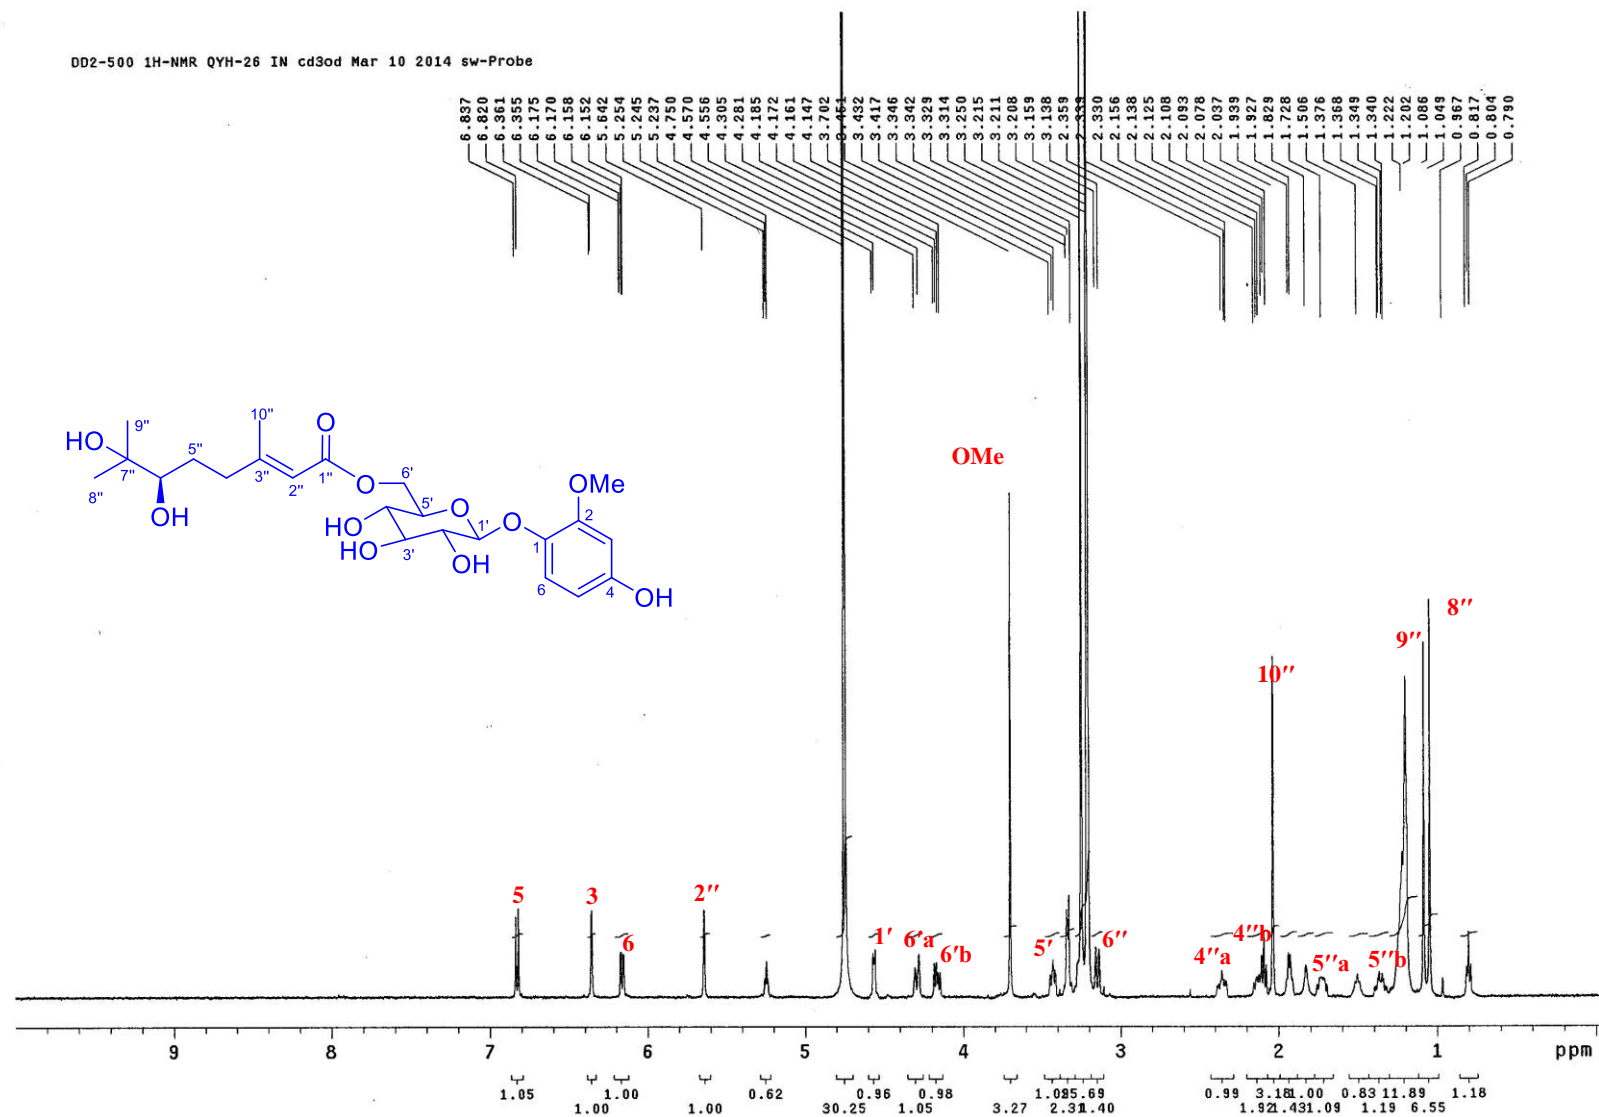

Figure S5. The  $^1\text{H}$  NMR Spectrum of Compound 1 in  $\text{MeOH-}d_4$  (500MHz)

DD2-500 13C-NMR QYH-26 IN cd3od Mar 11 2014 sw-Probe

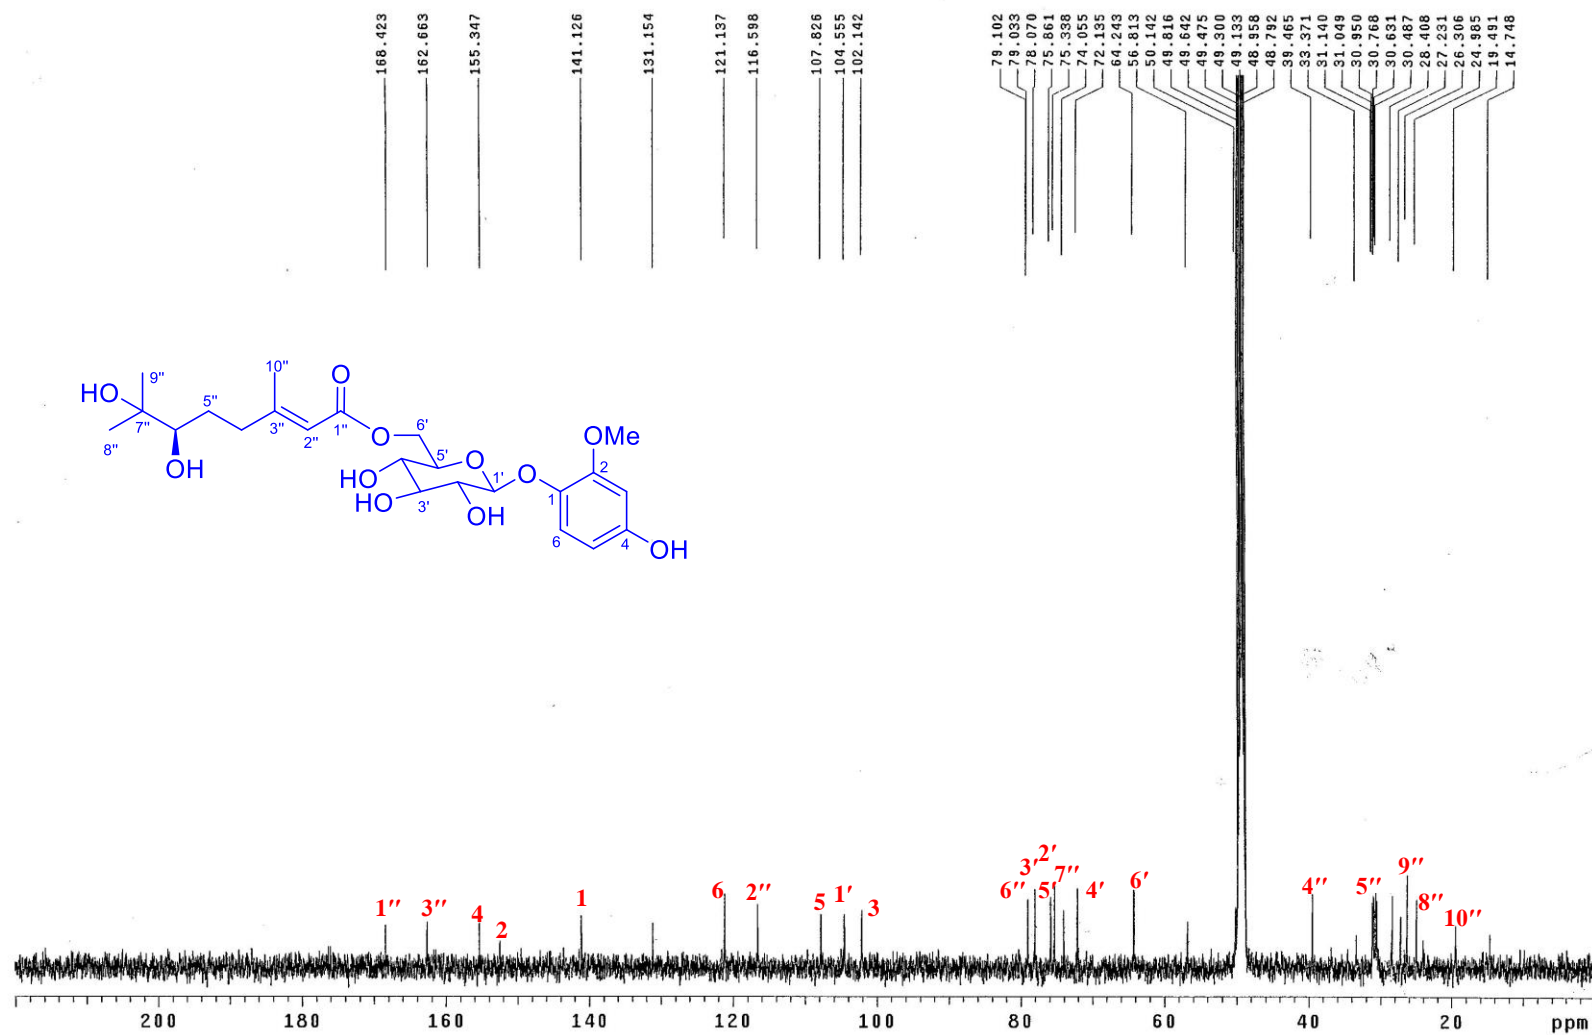

Figure S6. The  $^{13}\text{C}$  NMR spectrum of compound 1 in  $\text{MeOH-}d_4$  (125MHz)

DD2-500 gCOSY QYH-26 IN cd3od Apr 14 2014 sw

Temp. 25.0 C / 298.1 K  
Sample #11, Operator: vnmr1

Relax. delay 1.000 sec  
Acq. time 0.150 sec  
Width 3882.0 Hz  
2D Width 3882.0 Hz  
4 repetitions  
200 increments  
OBSERVE H1, 499.7694214 MHz  
DATA PROCESSING  
Sq. sine bell 0.075 sec  
F1 DATA PROCESSING  
Sq. sine bell 0.025 sec  
FT size 2048 x 2048  
Total time 16 min

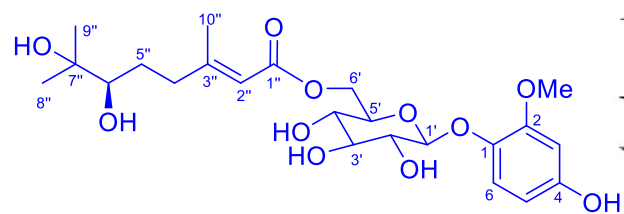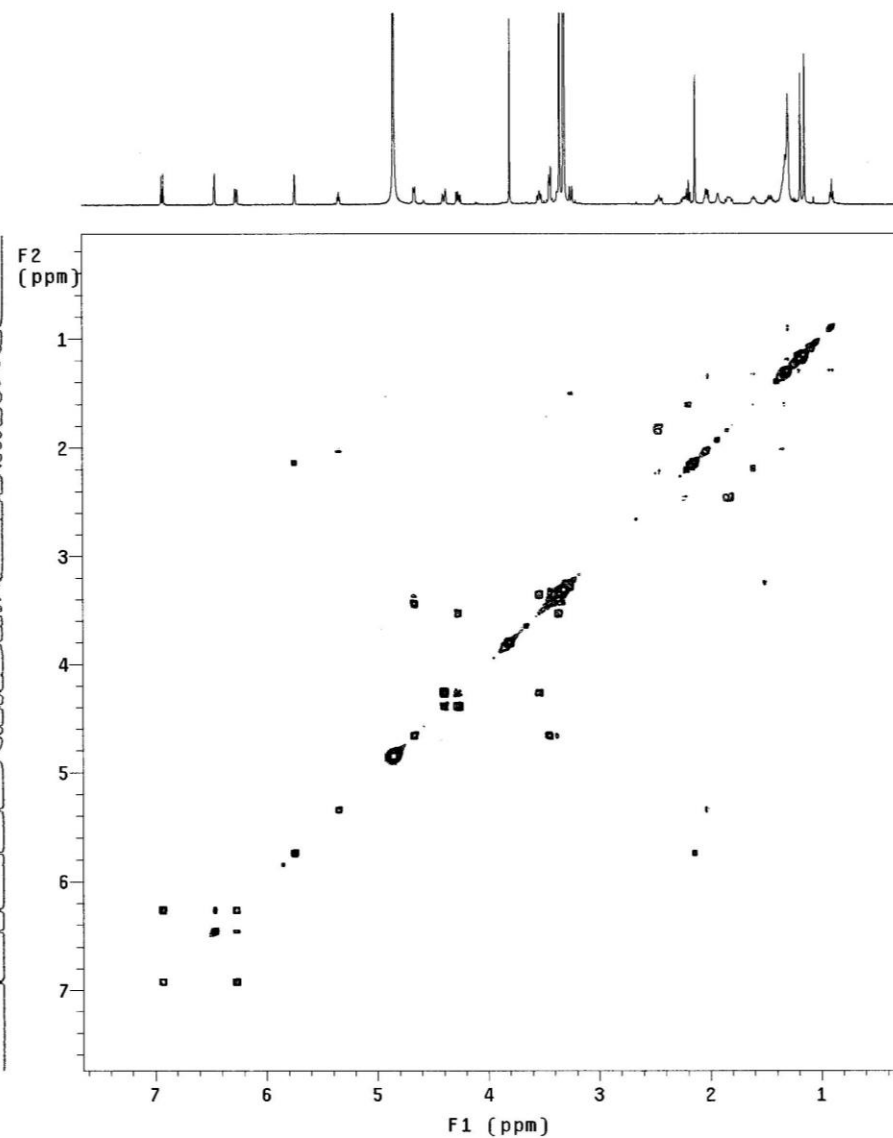

Figure S7. The  $^1\text{H}$ - $^1\text{H}$  COSY Spectrum of Compound 1 in  $\text{MeOH-}d_4$  (500MHz)

DD2-500 gHSQCAD QYH-76-1 IN cd3od Dec 25 2014 coldprobe

Temp. 25.0 C / 298.1 K  
 Sample #5, Operator: vnmr1  
 Relax. delay 1.000 sec  
 Acq. time 0.262 sec  
 Width 4595.6 Hz  
 2D Width 25133.5 Hz  
 8 repetitions  
 2 x 200 increments  
 OBSERVE H1, 499.7694110 MHz  
 DECOUPLE C13, 125.6784284 MHz  
 Power 38 dB  
 on during acquisition  
 off during delay  
 W40\_coldprobe modulated  
 DATA PROCESSING  
 Gauss apodization 0.069 sec  
 F1 DATA PROCESSING  
 Gauss apodization 0.007 sec  
 FT size 4096 x 2048  
 Total time 1 hr, 4 min

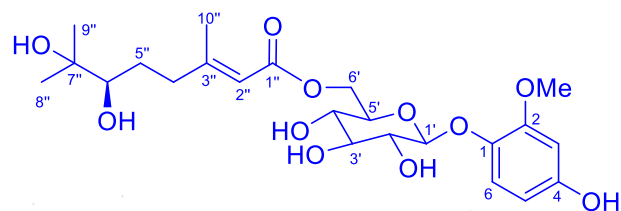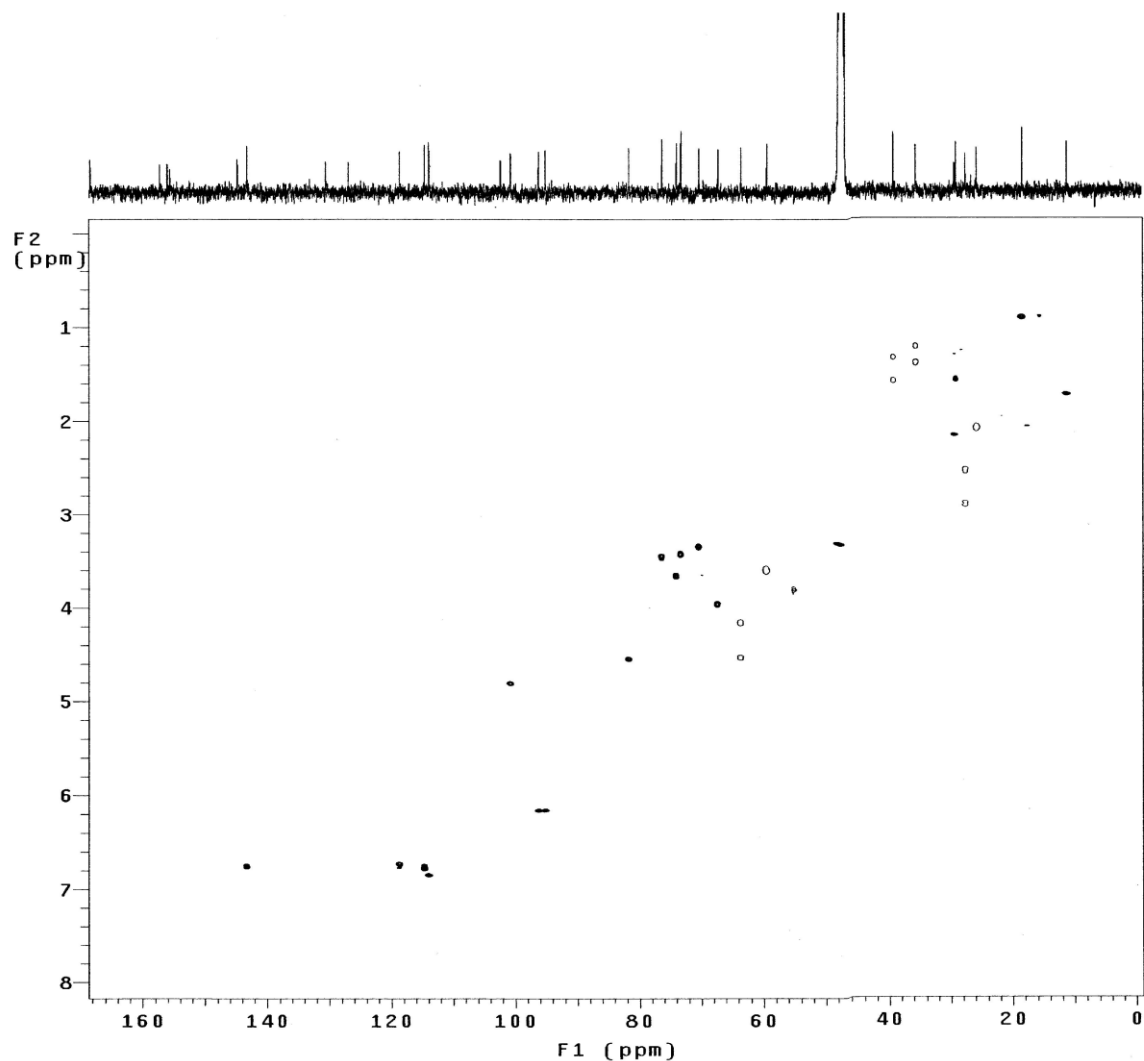

Figure S8. The HSQC Spectrum of Compound 1 in MeOH-*d*<sub>4</sub> (500MHz)

DD2-500 gHMBCAD QYH-26 IN cd3od Apr 14 2014 sw

Temp. 25.0 C / 298.1 K  
Sample #11, Operator: vnmr1

Relax. delay 1.000 sec  
Acq. time 0.310 sec  
Width 3882.0 Hz  
2D Width 30154.5 Hz  
64 repetitions  
2 x 160 increments  
OBSERVE H1, 499.7694214 MHz  
DATA PROCESSING  
Sq. sine bell 0.075 sec  
F1 DATA PROCESSING  
Gauss apodization 0.005 sec  
FT size 4096 x 2048  
Total time 7 hr

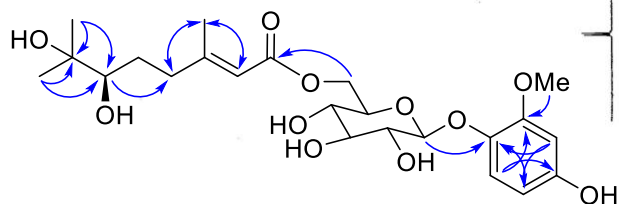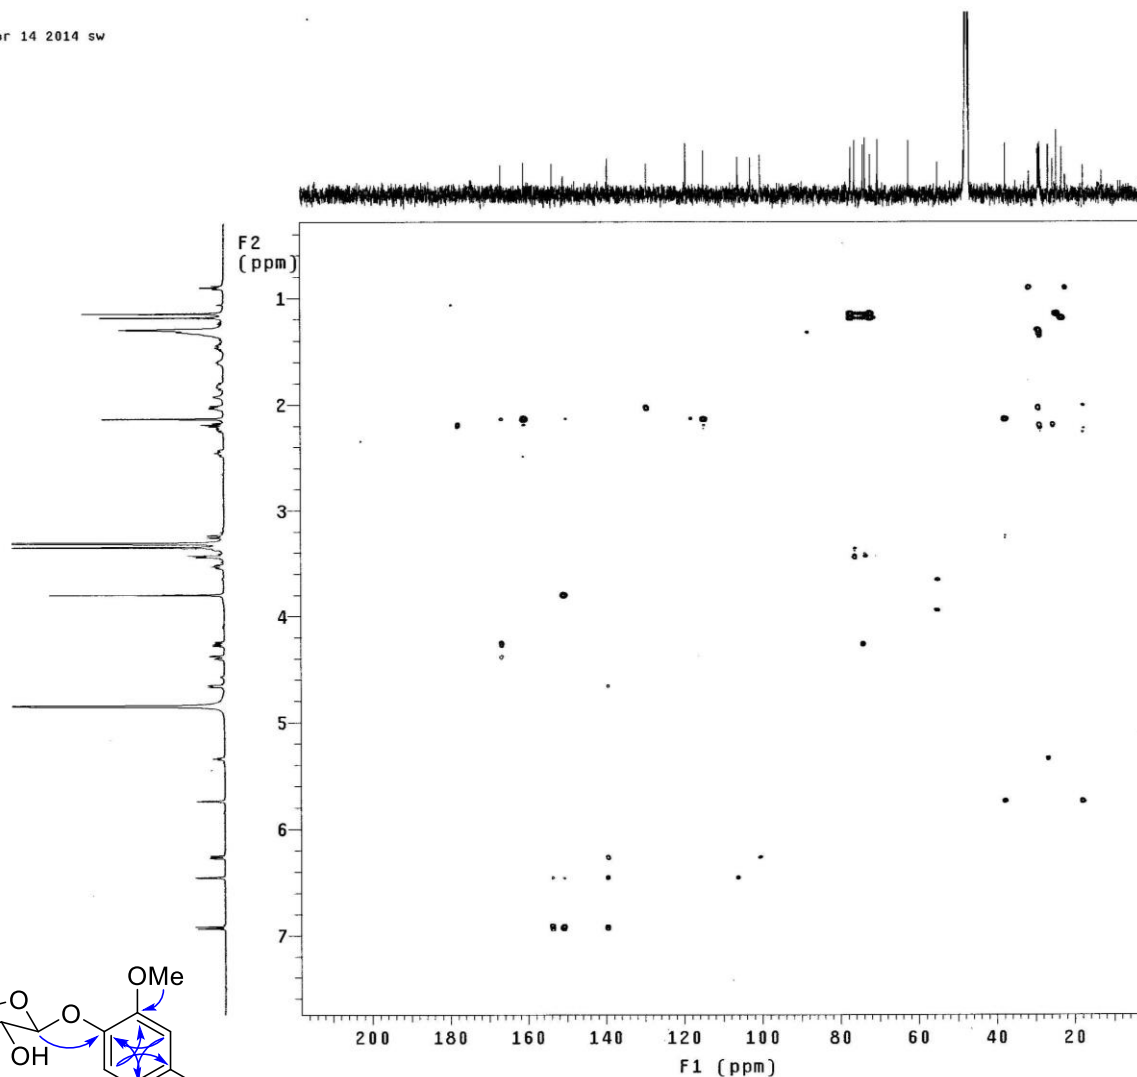

**Figure S9. The HMBC Spectrum of Compound 1 in MeOH-*d*<sub>4</sub> (500MHz)**

# Qualitative Analysis Report

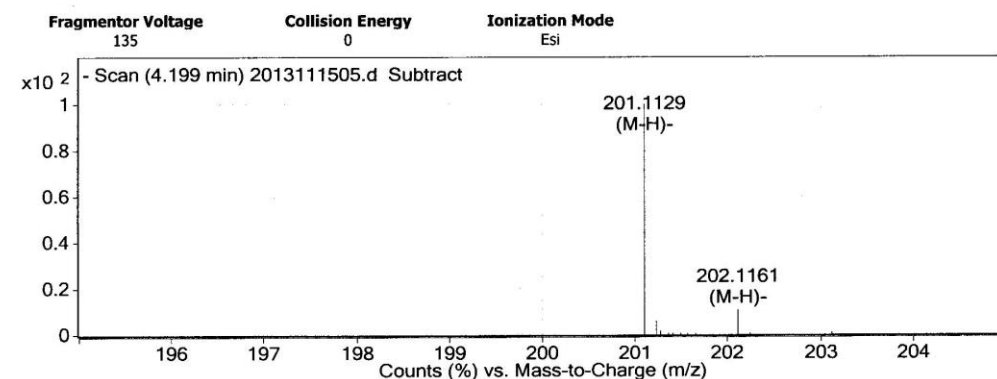

## Peak List

| m/z      | z | Abund   | Formula                                        | Ion    |
|----------|---|---------|------------------------------------------------|--------|
| 139.1124 |   | 61174   |                                                |        |
| 201.1129 | 1 | 1183020 | C <sub>10</sub> H <sub>17</sub> O <sub>4</sub> | (M-H)- |
| 201.2331 |   | 69813   |                                                |        |
| 202.1161 | 1 | 130005  | C <sub>10</sub> H <sub>17</sub> O <sub>4</sub> | (M-H)- |
| 247.1182 |   | 90459   |                                                |        |
| 269.1001 |   | 109661  |                                                |        |
| 403.2338 |   | 248976  |                                                |        |

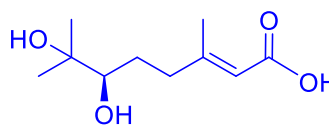

## Formula Calculator Element Limits

| Element | Min | Max |
|---------|-----|-----|
| C       | 3   | 100 |
| H       | 0   | 500 |
| O       | 0   | 90  |
| N       | 0   | 5   |
| S       | 0   | 5   |
| Cl      | 0   | 2   |
| Br      | 0   | 0   |
| Si      | 0   | 0   |
| F       | 0   | 0   |
| P       | 0   | 0   |

## Formula Calculator Results

| Formula                                        | Best | Mass     | Tgt Mass | Diff (ppm) | Ion Species                                    | Score |
|------------------------------------------------|------|----------|----------|------------|------------------------------------------------|-------|
| C <sub>10</sub> H <sub>18</sub> O <sub>4</sub> | TRUE | 202.1202 | 202.1205 | 1.68       | C <sub>10</sub> H <sub>17</sub> O <sub>4</sub> | 99.95 |

--- End Of Report ---

Figure S10. The HRESIMS Spectrum of Compound 1a

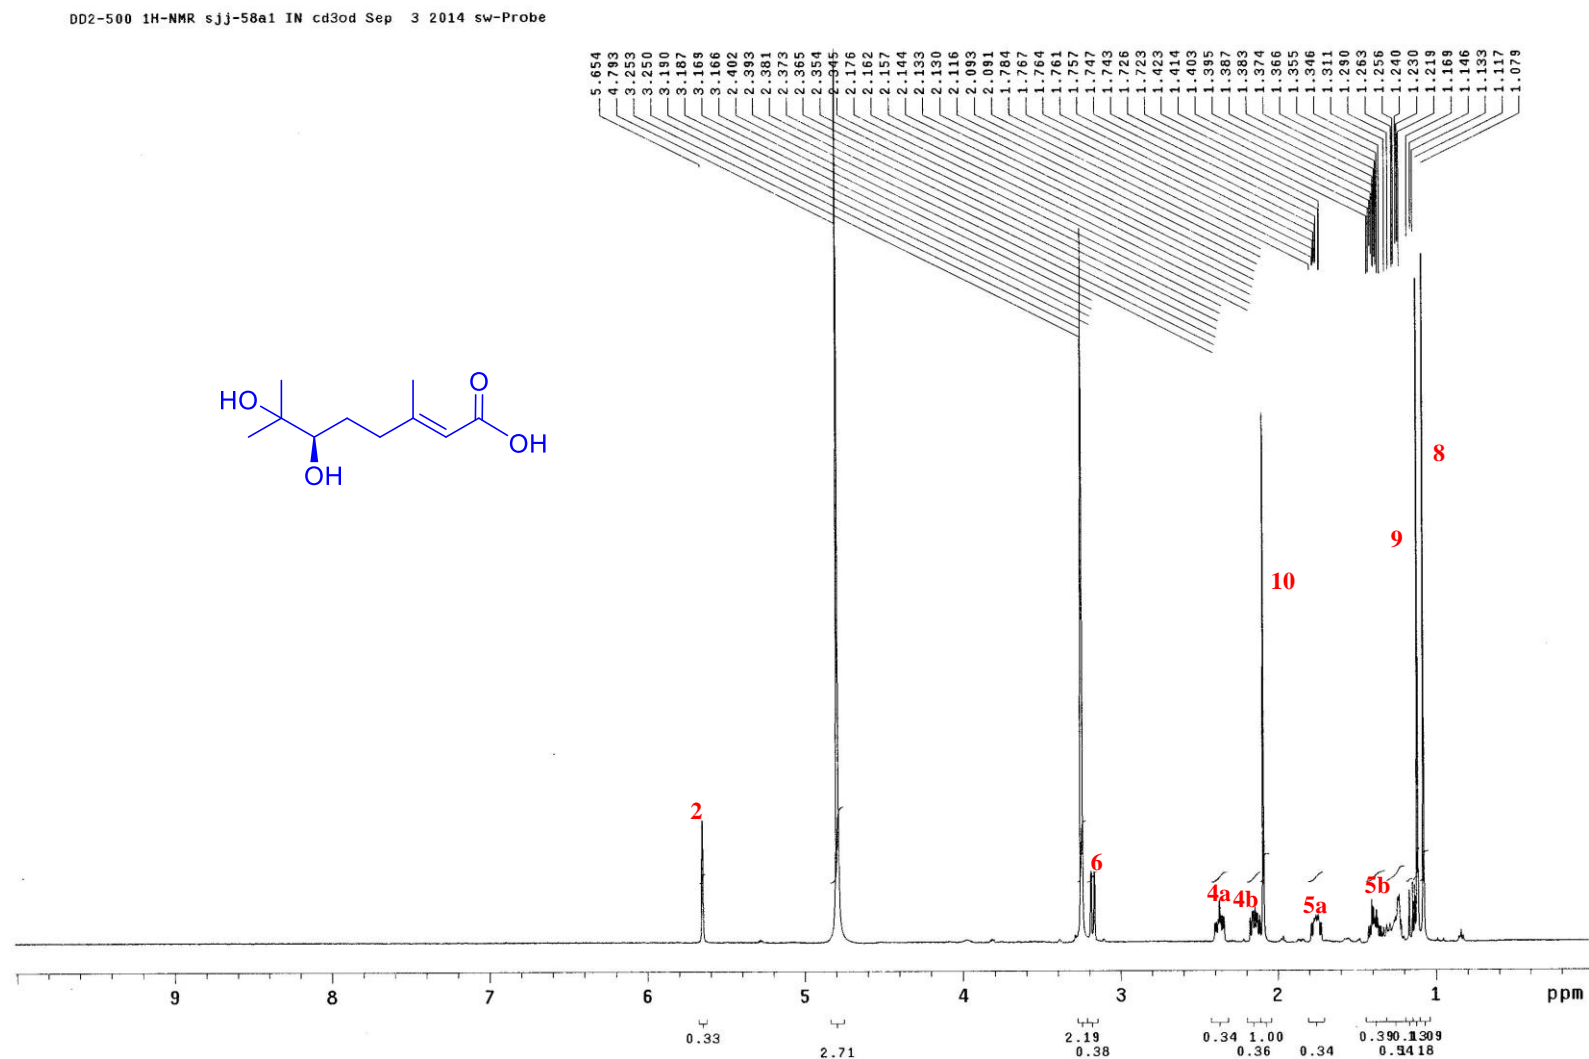

Figure S11. The  $^1\text{H}$  NMR spectrum of compound 1a in  $\text{MeOH-}d_4$  (500MHz)

DD2-500 13C-NMR sjj-58a IN cd3od Sep 3 2014 sw-Probe

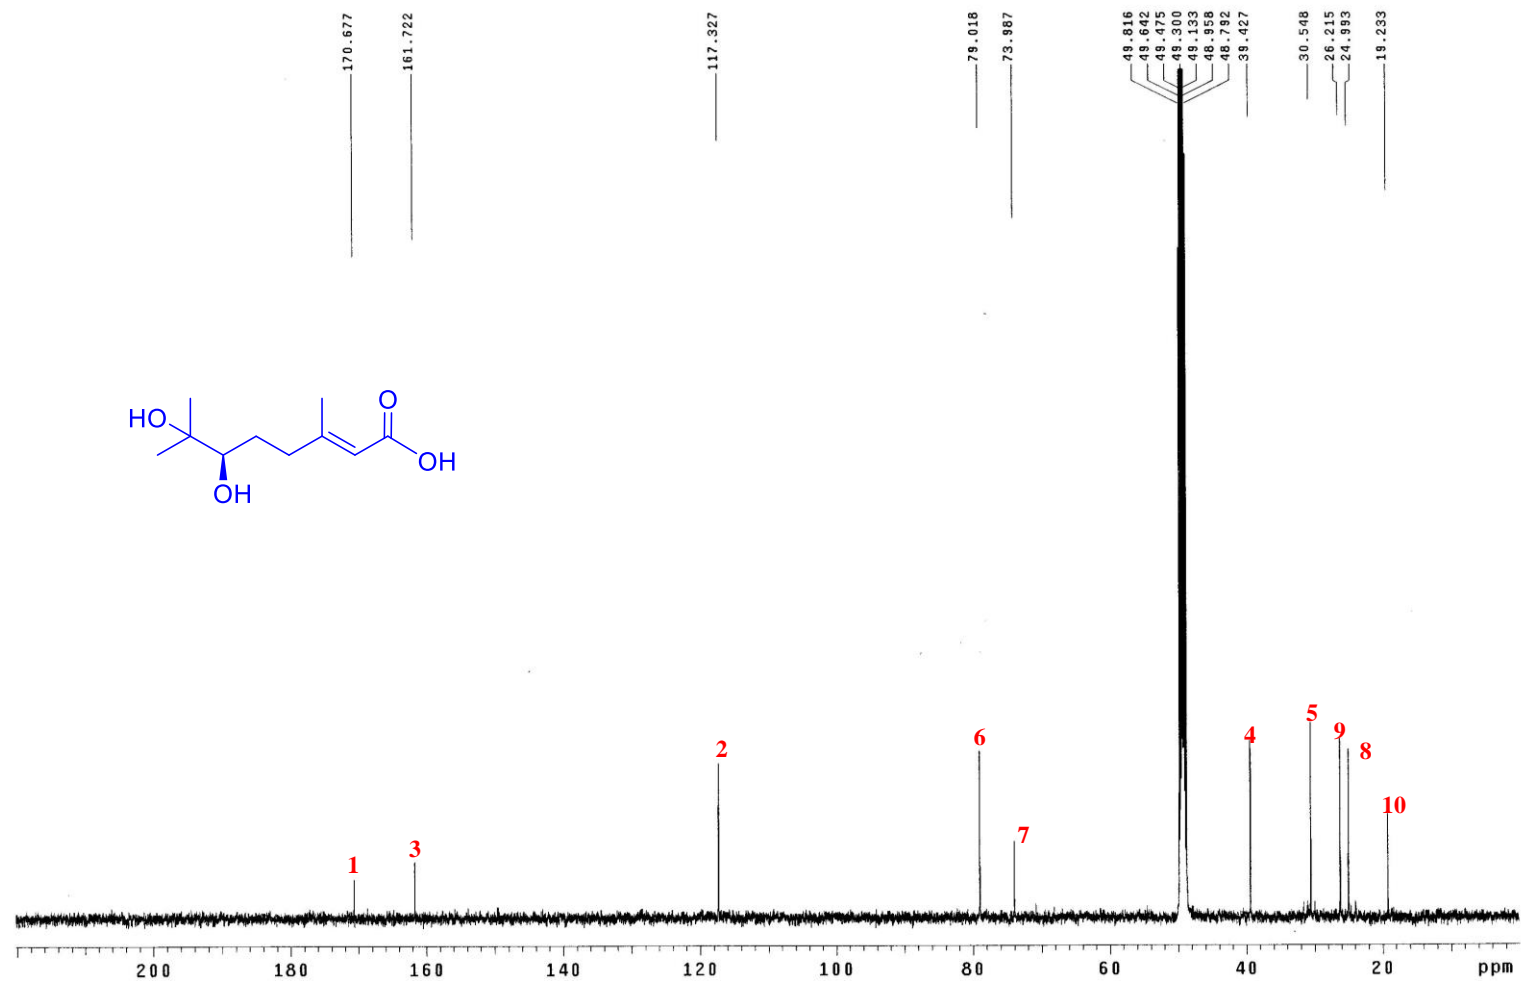

Figure S12. The  $^{13}\text{C}$  NMR spectrum of compound 1a in  $\text{MeOH-}d_4$  (125 MHz)

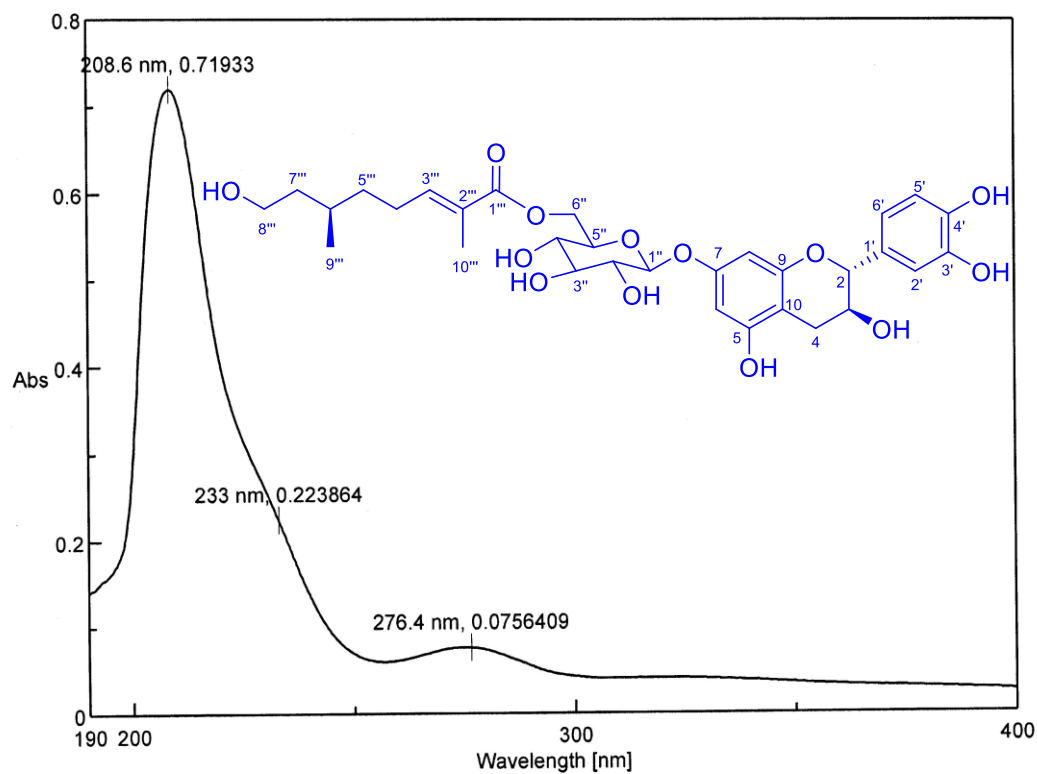

[Comment]  
 Sample Name 76-1  
 Comment 0.02  
 User  
 Division UV  
 324  
 [Measurement Information]  
 Instrument Name V-650  
 Model Name V-650  
 Serial No. A034461150

Accessory PSC-718  
 Accessory S/N A001761114  
 Position 1  
 Cell Length 10 mm  
 Temperature 19.98 C  
 Control Sensor Holder  
 Monitor Sensor Holder  
 Start Mode Start immediately

Photometric Mode Abs  
 Measurement range 400 - 190 nm  
 Data pitch 0.2 nm  
 Band width(UV/Vis) 2.0 nm  
 Response Medium  
 Scanning speed 200 nm/min  
 Source Change 340 nm  
 Light Source D2/M1  
 Filter Exchange Step  
 Correction Baseline

[Data Information]  
 Creation Date 2015-3-10 19:31  
 Data array type Linear data array  
 Horizontal Wavelength [nm]  
 Vertical Abs  
 Start 400 nm  
 End 190 nm  
 Data pitch 0.2 nm  
 Data points 1051

**Figure S13. The UV Spectrum of Compound 2**

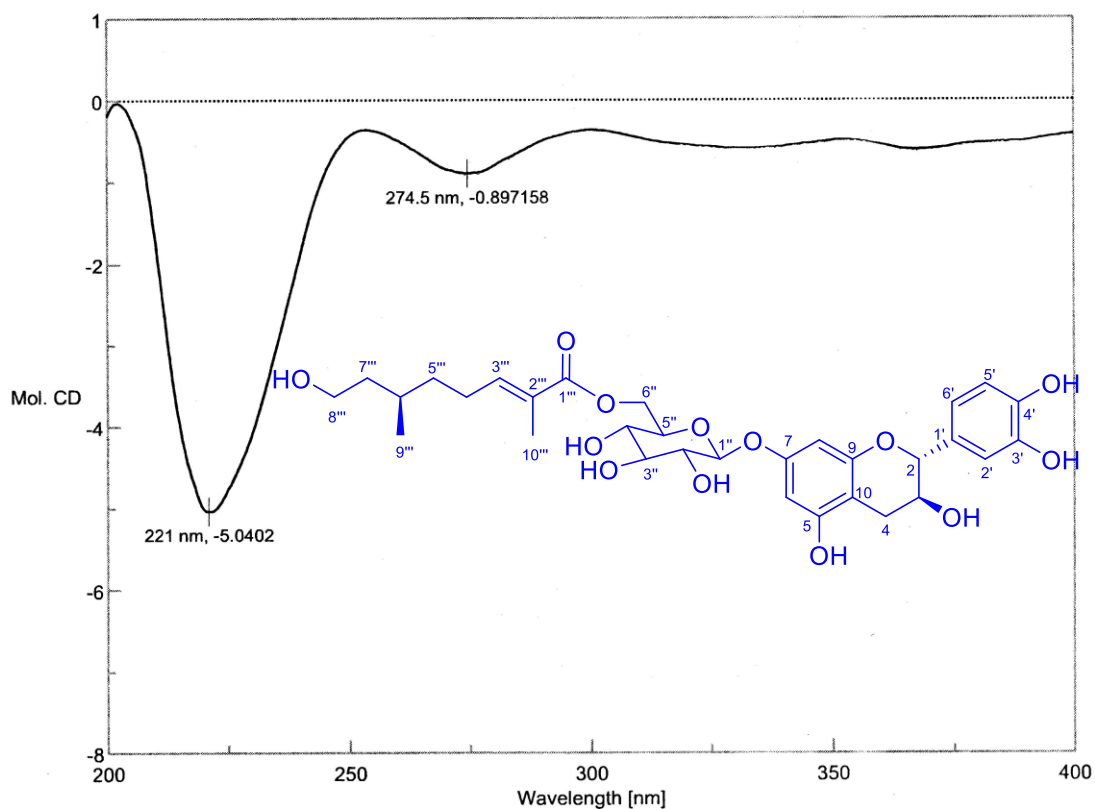

[Comments]  
 Sample name QYH-76-1  
 Comment  
 User  
 Division  
 Company dell

[Measurement Information]  
 Instrument Name J-815  
 Model Name J-815  
 Serial No. A024461168

Accessory Standard  
 Accessory S/N A024461168  
 Cell Length 1 mm

Photometric Mode CD, HT, Abs  
 Measure Range 400 - 200 nm  
 Data pitch 0.5 nm  
 Sensitivity Standard  
 D.I.T. 1 sec  
 Band width 2.00 nm  
 Start Mode Immediately  
 Scanning Speed 100 nm/min  
 Baseline Correction Baseline  
 Shutter Control Auto  
 PMT Voltage Auto  
 Accumulations 2  
 Solvent MEOH  
 Concentration 0.192 (w/v)%

[Detailed Information]  
 Creation date 2015-3-24 14:32

Data array type Linear data array \* 3  
 Horizontal axis Wavelength [nm]  
 Vertical axis(1) Mol. CD  
 Vertical axis(2) HT [V]  
 Vertical axis(3) Abs  
 Start 400 nm  
 End 200 nm  
 Data interval 0.5 nm  
 Data points 401

**Figure S14. CD Spectrum of Compound 2 in MeOH**

# Qualitative Analysis Report

**Data Filename** 2015010801.d  
**Sample Type** Sample  
**Instrument Name** Instrument 1  
**Acq Method**  
**DA Method** TEST LCMS.m

**Sample Name** QYH-76-1  
**Position** P1-C2  
**User Name**  
**IRM Calibration Status**  
**Comment**

## User Chromatograms

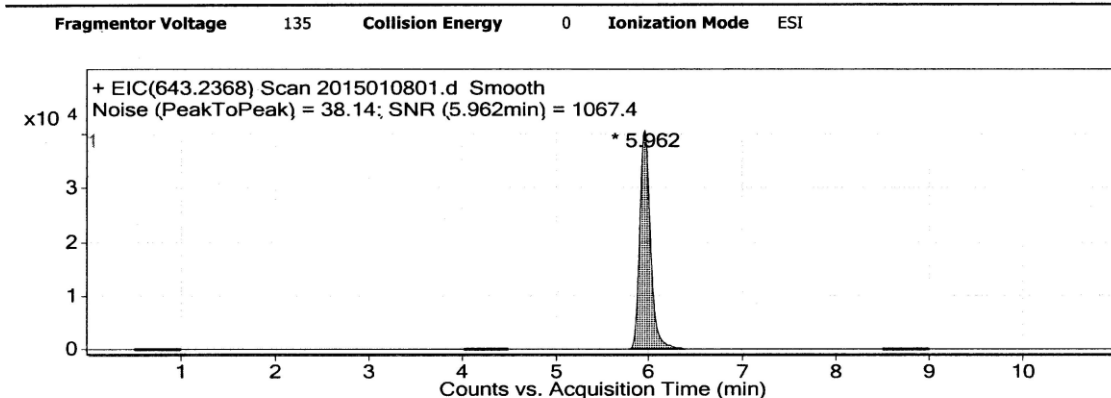

## Integration Peak List

| Peak | Start | RT    | End   | Height | Area   | Area % | Signal To Noise |
|------|-------|-------|-------|--------|--------|--------|-----------------|
| 1    | 5.785 | 5.962 | 6.397 | 40710  | 324002 | 100    | 1067.4          |

## User Spectra

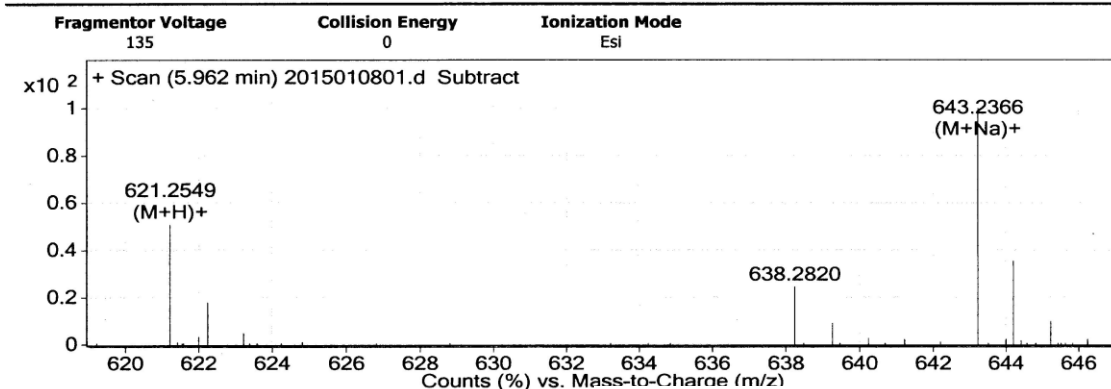

## Peak List

| m/z      | z | Abund | Formula        | Ion     |
|----------|---|-------|----------------|---------|
| 125.986  |   | 36790 |                |         |
| 143.0326 |   | 18347 |                |         |
| 158.9643 |   | 19062 |                |         |
| 187.1263 |   | 14522 |                |         |
| 469.206  | 1 | 14495 |                |         |
| 603.2436 | 1 | 12328 |                |         |
| 621.2549 | 1 | 29255 | C31 H41 O13    | (M+H)+  |
| 638.282  | 1 | 14140 |                |         |
| 643.2366 | 1 | 57739 | C31 H40 Na O13 | (M+Na)+ |
| 644.2394 | 1 | 20346 | C31 H40 Na O13 | (M+Na)+ |

## Formula Calculator Element Limits

| Element | Min | Max |
|---------|-----|-----|
| C       | 3   | 60  |
| H       | 0   | 120 |
| O       | 0   | 30  |

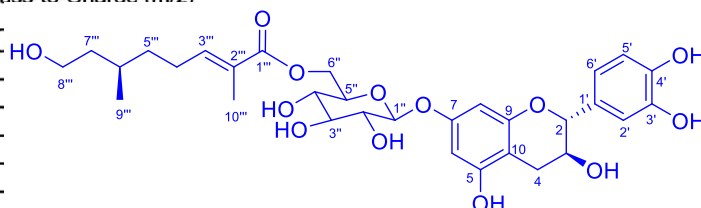

**Figure S15. The HRESIMS Spectrum of Compound 2 in MeOH**

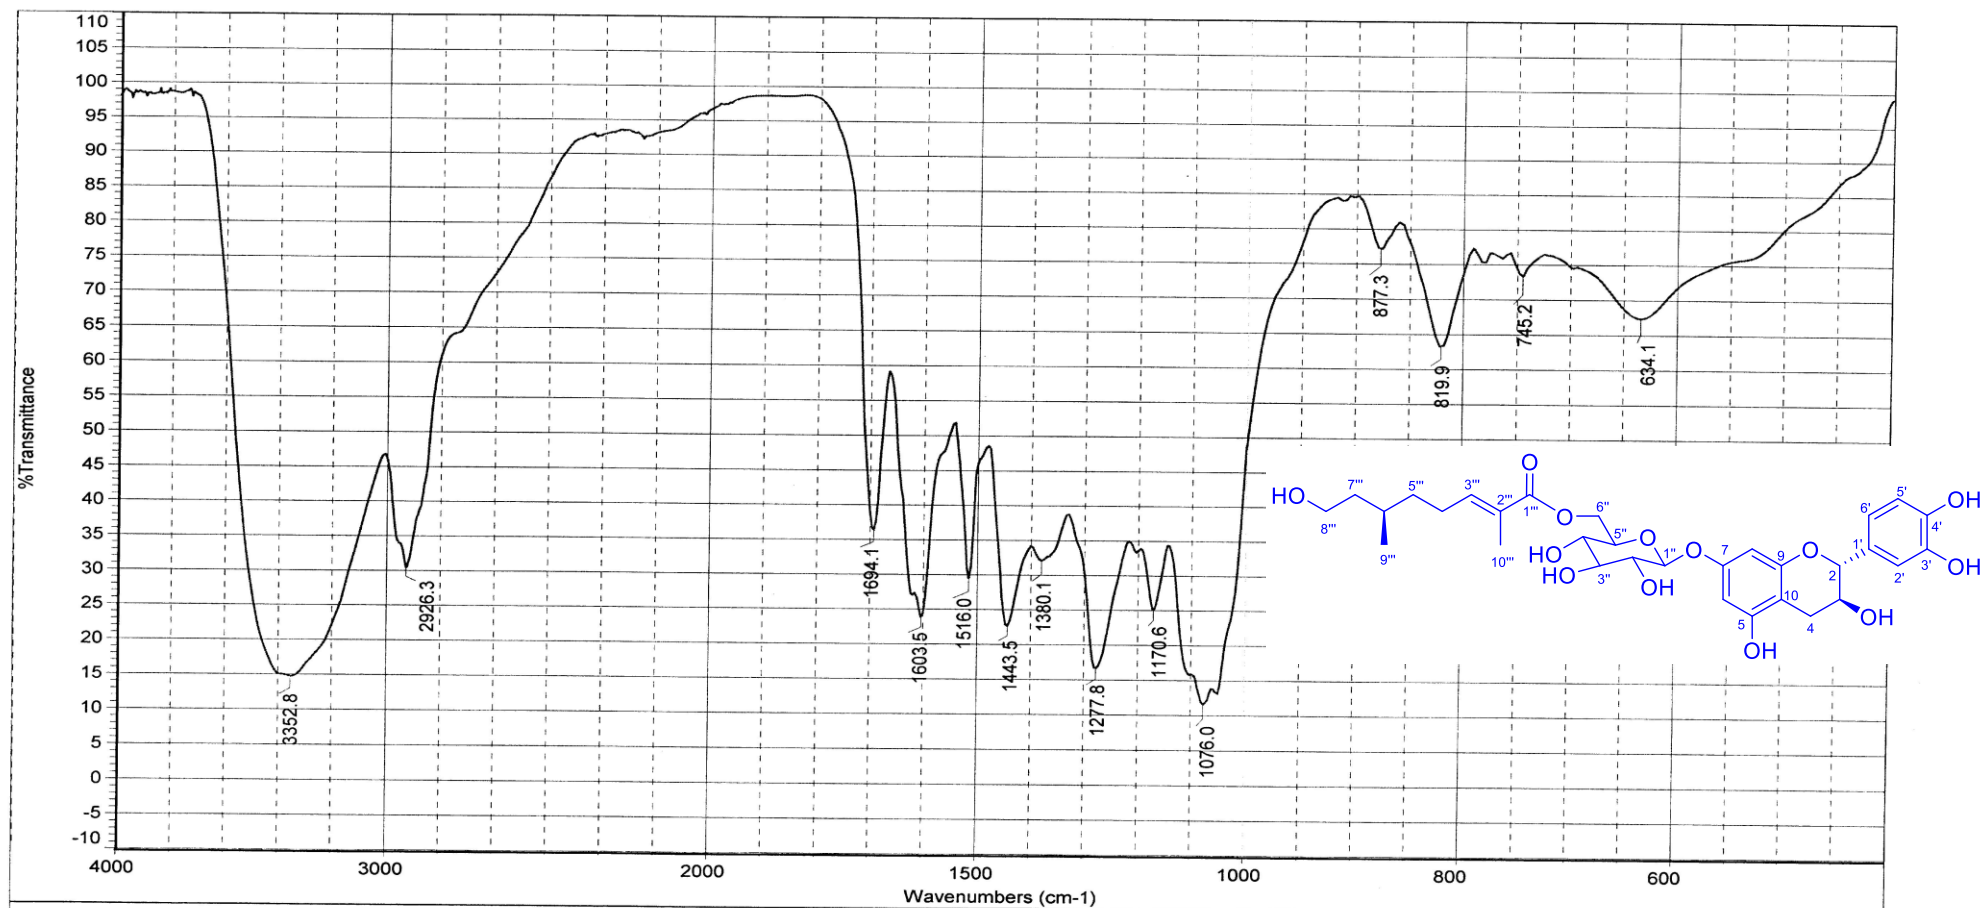

日期: 星期四 3月 12 15:06:36 2015 (GMT+08:00) Sample Name : 76 - 1

(显微镜透射法FT- IR Microscope Transmission)

扫描次数: 100

傅立叶变换显微镜红外(FT-IR Microscope): Centaurus

分辨率: 8.000

美国热电公司(Thermo)傅立叶变换红外光谱仪:Nicolet 5700

**Figure S16. The IR Spectrum of Compound 2**

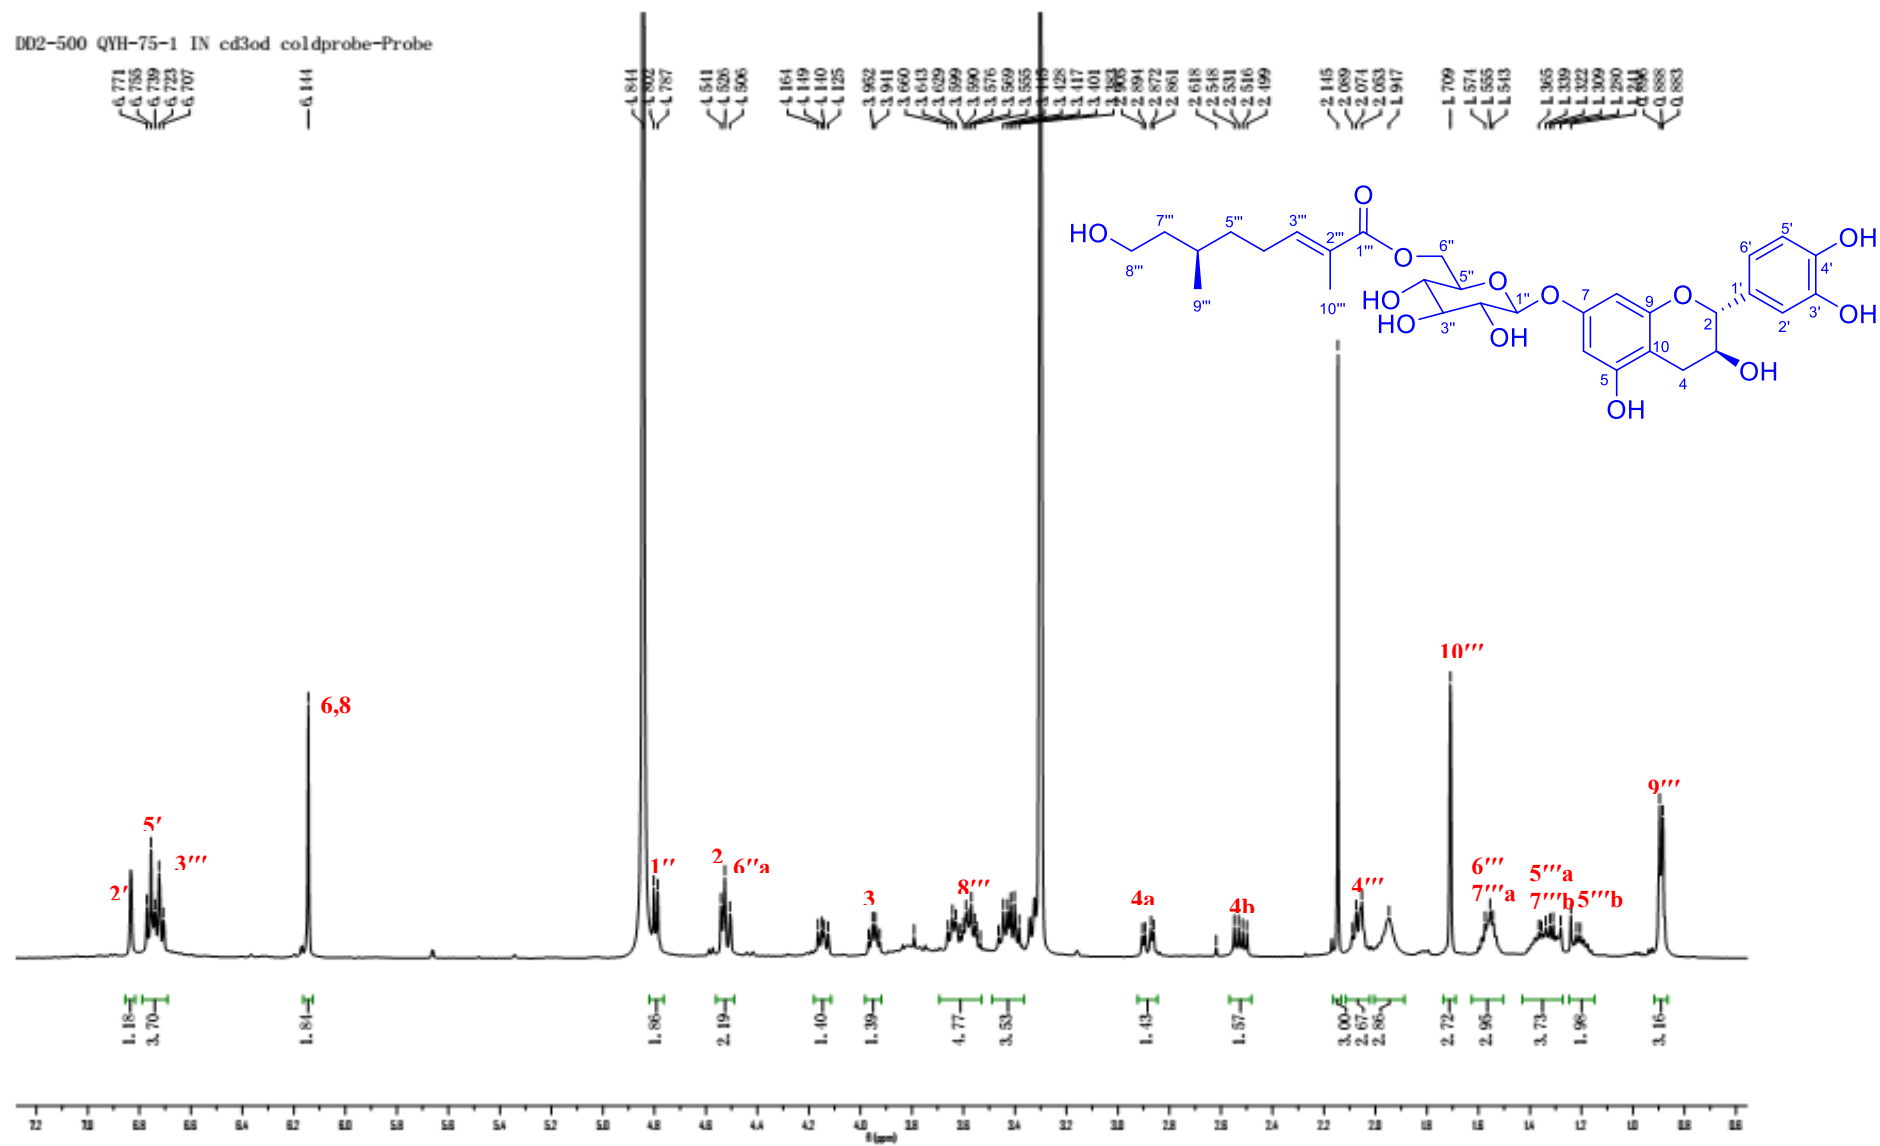

Figure S17. The  $^1\text{H}$  NMR Spectrum of Compound 2 in  $\text{MeOH-}d_4$  (500MHz)

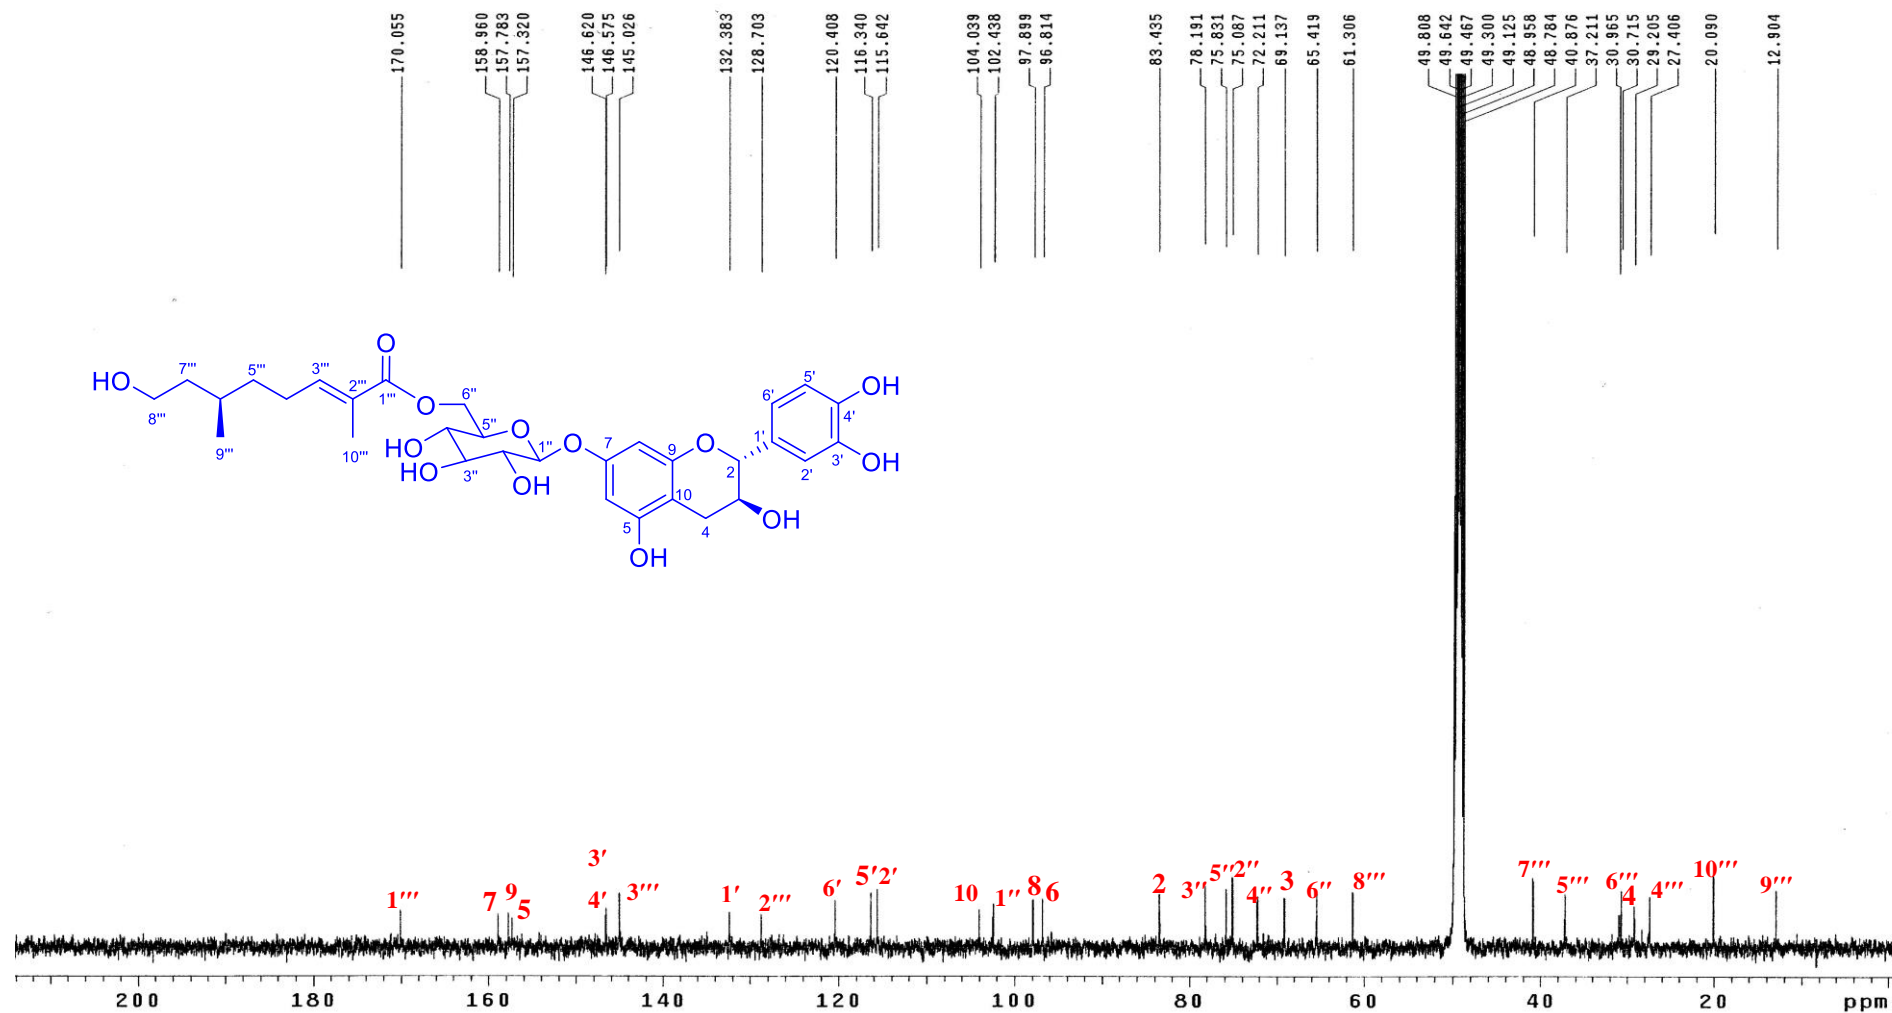

Figure S18. The  $^{13}\text{C}$  NMR Spectrum of Compound 2 in  $\text{MeOH-}d_4$  (125MHz)

DD2-500 gCOSY

Temp. 25.0 C  
Sample #5, 0p

Relax. delay  
Acq. time 0.  
Width 459  
2D Width 459  
4 repetition  
128 incremer

OBSERVE H1,  
DATA PROCESSING  
Sq. sine bell 0.075 sec  
F1 DATA PROCESSING  
Sq. sine bell 0.028 sec  
FT size 2048 x 2048  
Total time 10 min

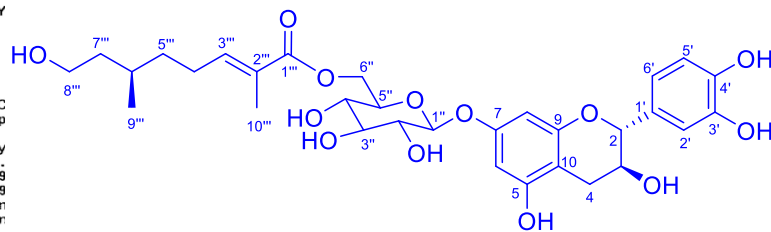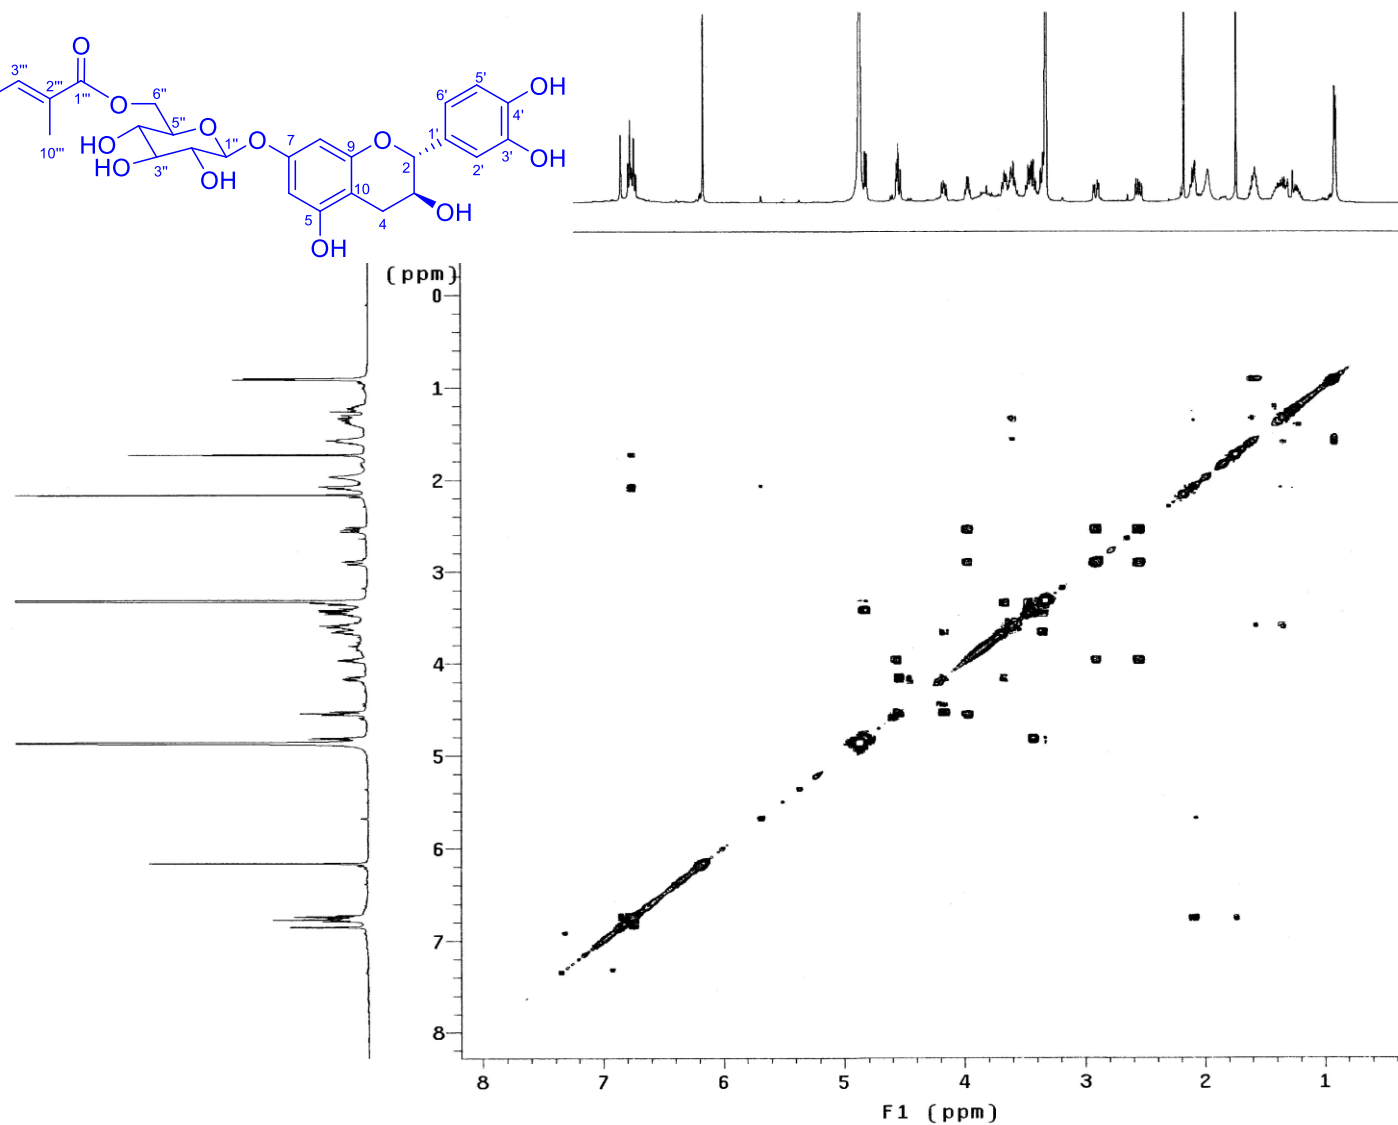

Figure S19. The  $^1\text{H}$ - $^1\text{H}$  COSY Spectrum of Compound 2 in  $\text{MeOH-}d_4$  (500MHz)

DD2-500 gHSQCAD QYH-76-1 IN cd3od Dec 25 2014 coldprobe

Temp. 25.0 C / 298.1 K  
Sample #5, Operator: vnmr1

Relax. delay 1.000 sec  
Acq. time 0.262 sec  
Width 4595.6 Hz  
2D Width 25133.5 Hz  
8 repetitions  
2 x 200 increments  
OBSERVE H1, 499.7694110 MHz  
DECOUPLE C13, 125.6784284 MHz  
Power 38 dB  
on during acquisition  
off during delay  
W40\_coldprobe modulated  
DATA PROCESSING  
Gauss apodization 0.069 sec  
F1 DATA PROCESSING  
Gauss apodization 0.007 sec  
FT size 4096 x 2048  
Total time 1 hr, 4 min

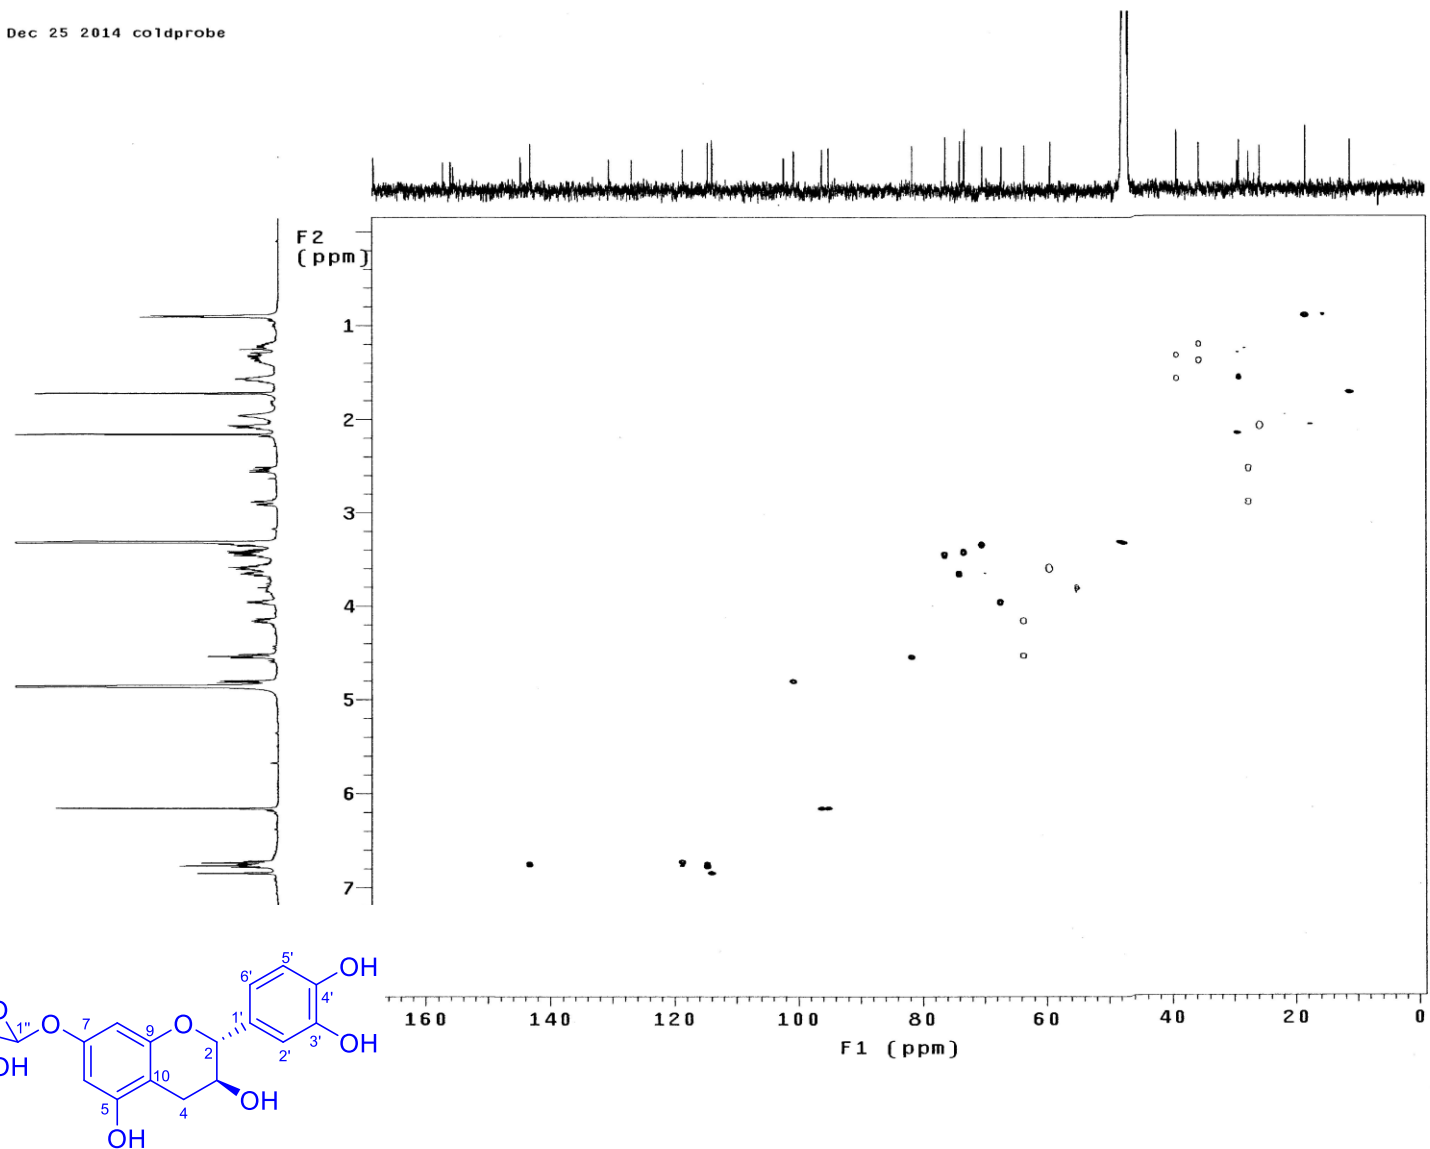

Figure S20. The HSQC Spectrum of Compound 2 in  $\text{MeOH-}d_4$  (500MHz)

Temp. 25.0 C / 298.1 K  
Sample #5, Operator: vnmr1

Relax. delay 1.000 sec  
Acq. time 0.262 sec  
Width 4595.6 Hz  
2D Width 30154.5 Hz  
16 repetitions  
2 x 200 increments  
OBSERVE H1, 499.7694110 MHz  
DATA PROCESSING  
Sq. sine bell 0.075 sec  
F1 DATA PROCESSING  
Gauss apodization 0.006 sec  
FT size 4096 x 2048  
Total time 2 hr, 12 min

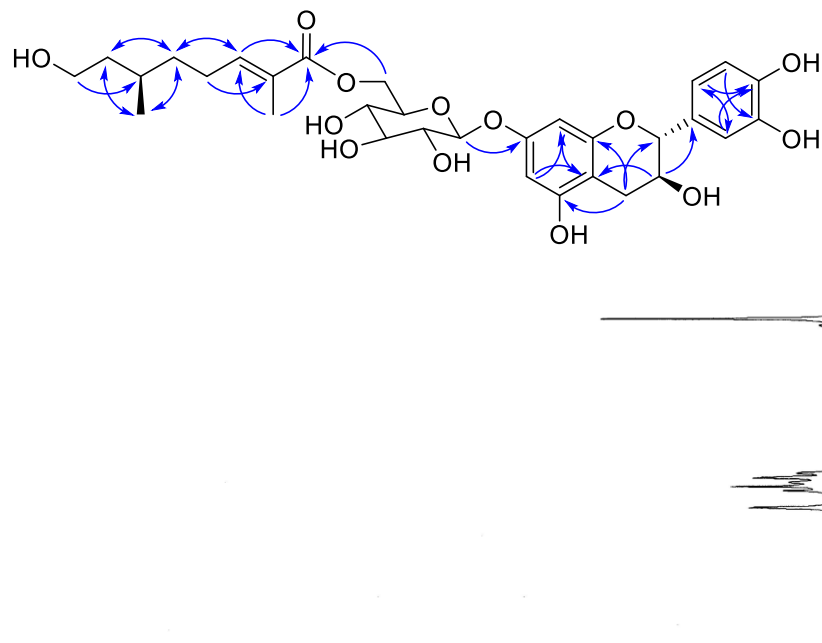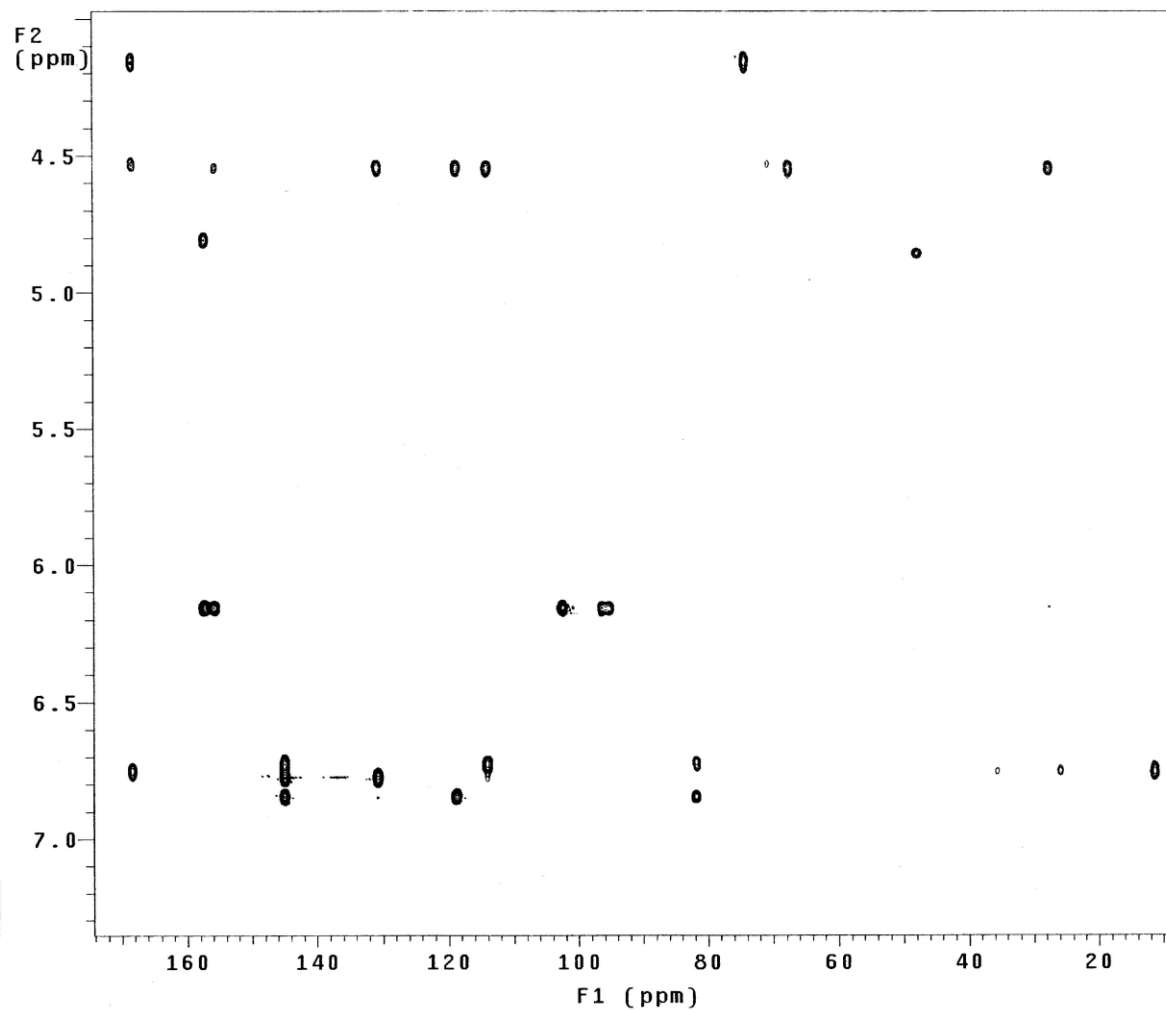

**Figure S21. The HMBC Spectrum of Compound 2 in MeOH-*d*<sub>4</sub> (500MHz)**

DD2-500 NOESY QYH-76-1 IN cd3od Jan 4 2015 coldprobe

Temp. 25.0 C / 298.1 K  
 Sample #1, Operator: vnmr1  
 Relax. delay 1.600 sec  
 Acq. time 0.150 sec  
 Width 4595.6 Hz  
 2D Width 4595.6 Hz  
 8 repetitions  
 2 x 200 increments  
 OBSERVE H1, 499.7694110 MHz  
 DATA PROCESSING  
 Gauss apodization 0.056 sec  
 F1 DATA PROCESSING  
 Gauss apodization 0.040 sec  
 FT size 2048 x 2048  
 Total time 2 hr, 18 min

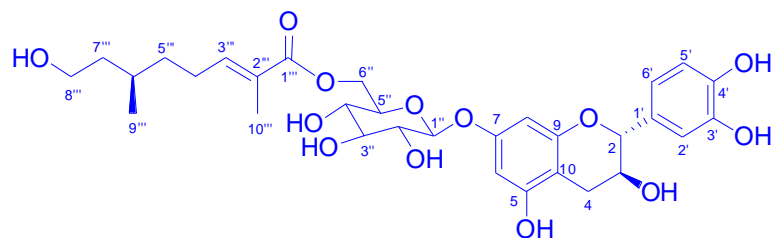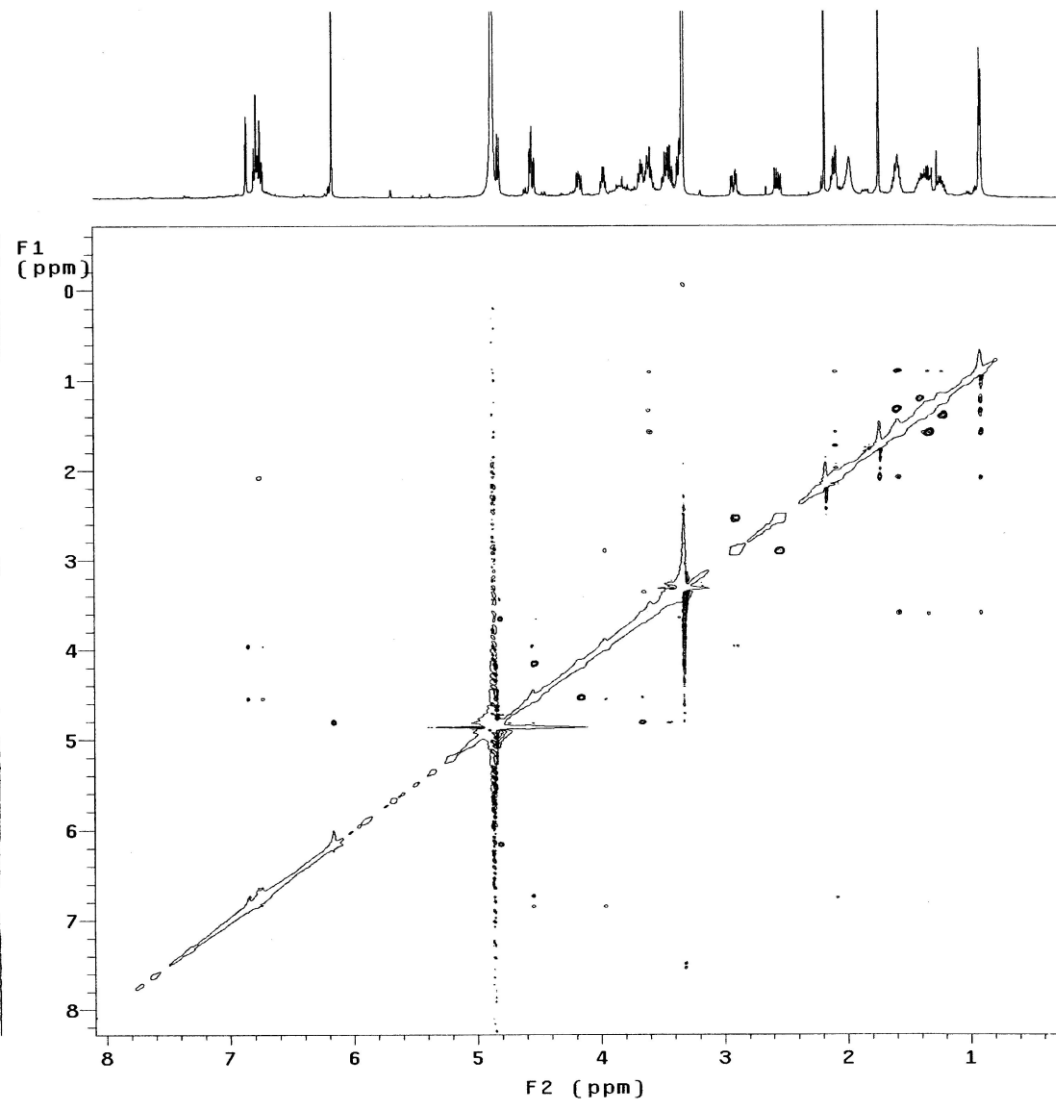

**Figure S22. The NOESY Spectrum of Compound 2 in MeOH- $d_4$  (500MHz)**

PROTON CD3OD D:\ DATA2015 4

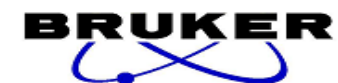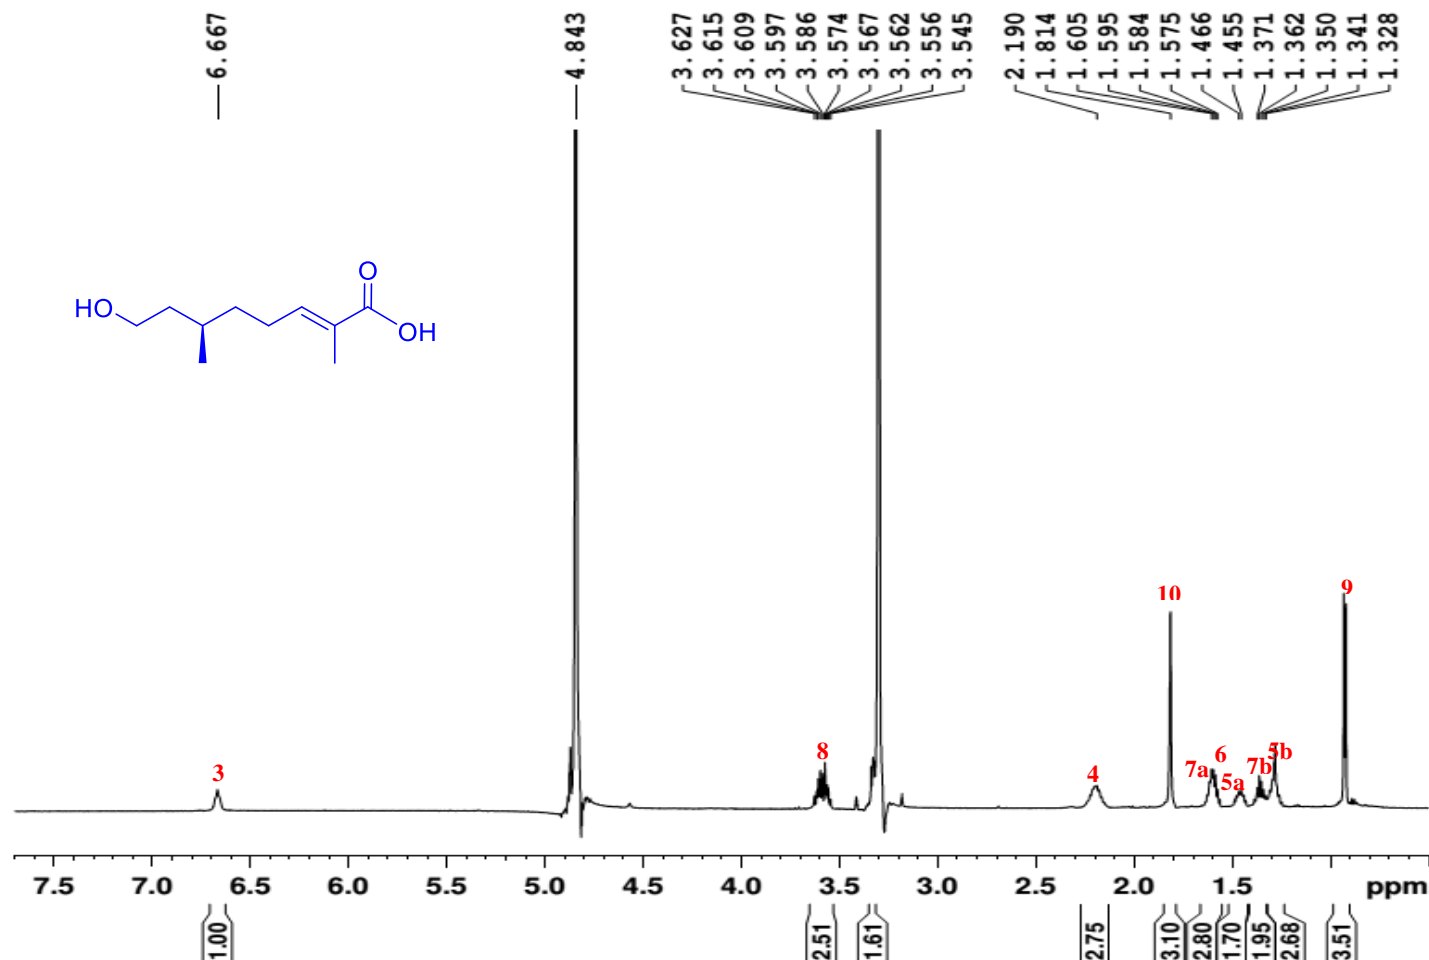

NAME 20151231 qyh-  
EXPNO 1  
PROCNO 1  
Date\_ 20151231  
Time 22.25  
INSTRUM spect  
PROBHD 5 mm CPDCH 13C  
PULPROG zg30  
TD 65536  
SOLVENT CD3OD  
NS 16  
DS 2  
SWH 12019.230  
FIDRES 0.183395  
AQ 2.7263477  
RG 57  
DW 41.600  
DE 20.00  
TE 298.0  
D1 1.00000000  
TD0 1

===== CHANNEL f1 =====  
SFO1 600.2537068  
NUC1 1H  
P1 11.50  
SI 65536  
SF 600.2499873  
WDW EM  
SSB 0  
LB 0.30  
GB 0  
PC 1.00

Figure S23. The  $^1\text{H}$  NMR Spectrum of Compound 2a in  $\text{MeOH-}d_4$  (600MHz)

Bruker AV111HD 600 20160105  
C13 CD3OD D:\ DATA2015 24

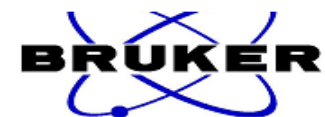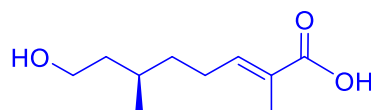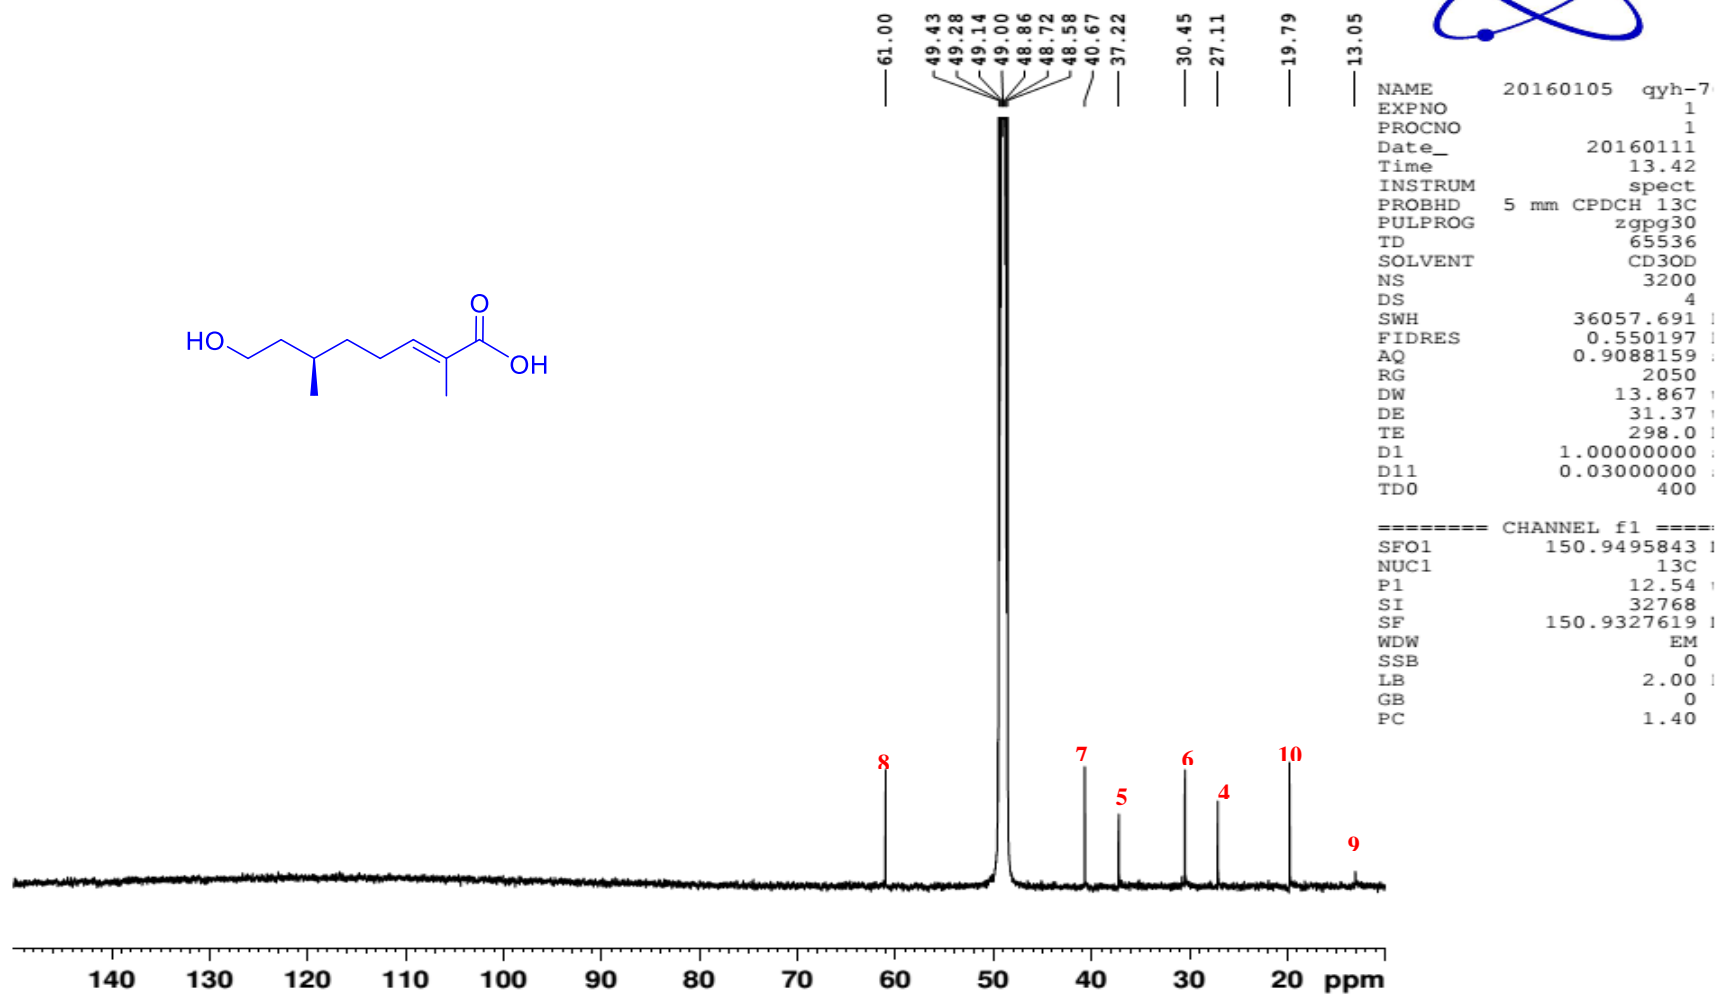

Figure S24. The  $^{13}\text{C}$  NMR Spectrum of Compound 2a in  $\text{MeOH-}d_4$  (150MHz)

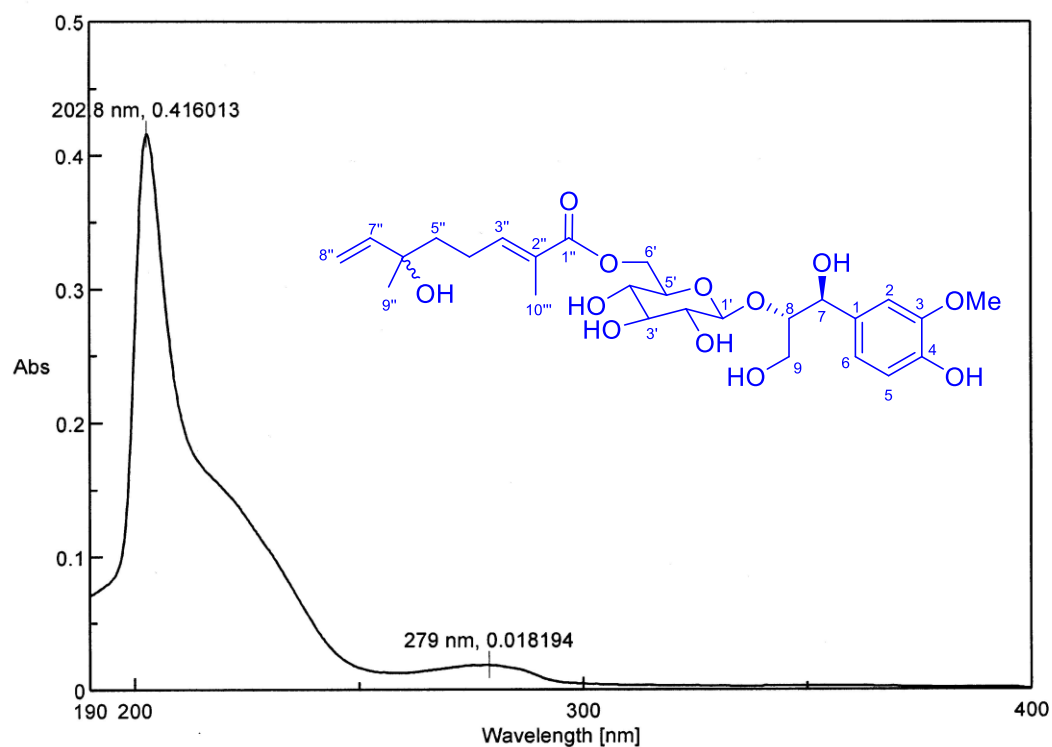

[Comment]  
 Sample Name QYH-40  
 Comment 0.02  
 User  
 Division UV  
 Company 324  
 [Measurement Information]  
 Instrument Name V-650  
 Model Name V-650  
 Serial No. A034461150

Accessory PSC-718  
 Accessory S/N A001761114  
 Position 1  
 Cell Length 10 mm  
 Temperature 19.94 C  
 Control Sensor Holder  
 Monitor Sensor Holder  
 Start Mode Start immediately

Photometric Mode Abs  
 Measurement range 400 - 190 nm  
 Data pitch 0.2 nm  
 Band width(UV/Vis) 2.0 nm  
 Response Medium  
 Scanning speed 200 nm/min  
 Source Change 340 nm  
 Light Source D2/WI  
 Filter Exchange Step  
 Correction Baseline

[Data Information]  
 Creation Date 2014-7-15 21:19

Data array type Linear data array  
 Horizontal Wavelength [nm]  
 Vertical Abs  
 Start 400 nm  
 End 190 nm  
 Data pitch 0.2 nm  
 Data points 1051

**Figure S25. The UV Spectrum of Compound 3 in MeOH**

# Single Mass Spectrum Deconvolution Report

**Analysis Name:** quyh0005.d      **Instrument:** LC-MSD-Trap-SL      **Print Date:** 9/23/2014 10:58:57 AM  
**Method:** standby.m      **Operator:** Operator      **Acq. Date:** 9/23/2014 10:48:10 AM  
**Sample Name:** QYH-40  
**Analysis Info:**

## Acquisition Parameter:

|                 |            |                       |             |                |           |
|-----------------|------------|-----------------------|-------------|----------------|-----------|
| Mass Range Mode | Std/Normal | Trap Drive            | 53.0        | Scan Begin     | 100 m/z   |
| Ion Polarity    | Positive   | Octopole RF Amplitude | 171.0 Vpp   | Scan End       | 800 m/z   |
| Ion Source Type | ESI        | Capillary Exit        | -115.0 Volt | Averages       | 5 Spectra |
| Dry Temp (Set)  | 330 °C     | Skimmer               | -40.0 Volt  | Max. Accu Time | 200000 µs |
| Nebulizer (Set) | 40.00 psi  | Oct 1 DC              | -12.00 Volt | ICC Target     | 20000     |
| Dry Gas (Set)   | 9.00 l/min | Oct 2 DC              | -1.70 Volt  | Charge Control | on        |

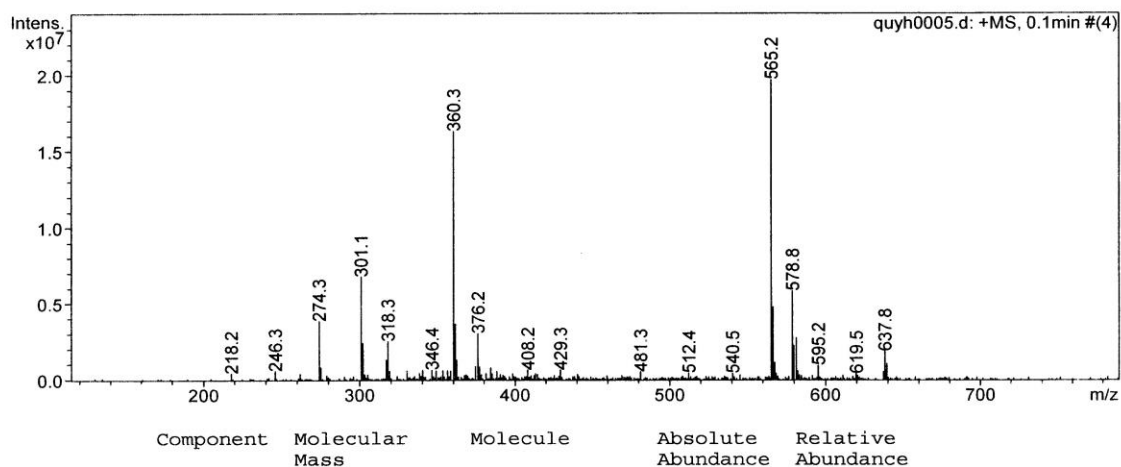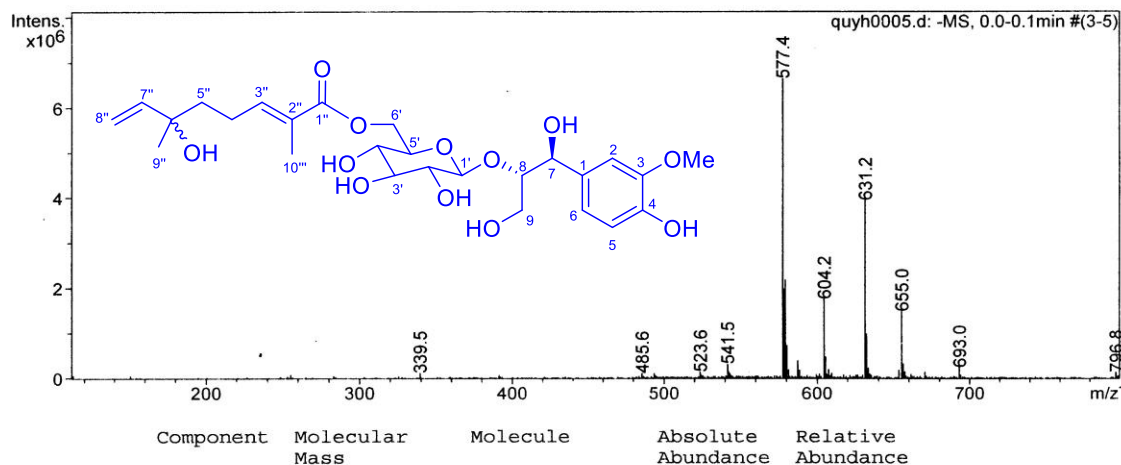

**Figure S26. The ESIMS Spectrum of Compound 3**

## Qualitative Analysis Report

Data Filename 2015042203.d  
Sample Type Sample  
Instrument Name Instrument 1  
Acq Method TEST LCMS.m  
DA Method TEST LCMS.m

Sample Name QYH-40  
Position P1-C3  
User Name  
IRM Calibration Status Success  
Comment

### User Chromatograms

Fragmentor Voltage 120 Collision Energy 0 Ionization Mode ESI

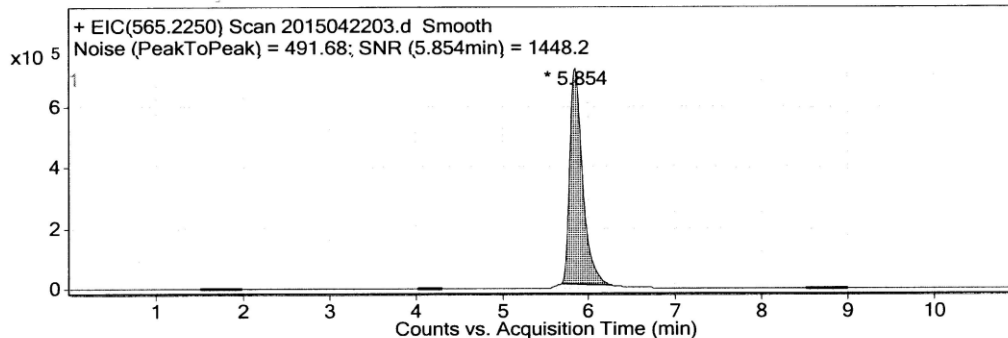

### Integration Peak List

| Peak | Start | RT    | End   | Height | Area    | Area % | Signal To Noise |
|------|-------|-------|-------|--------|---------|--------|-----------------|
| 1    | 5.693 | 5.854 | 6.273 | 712047 | 7468829 | 100    | 1448.2          |

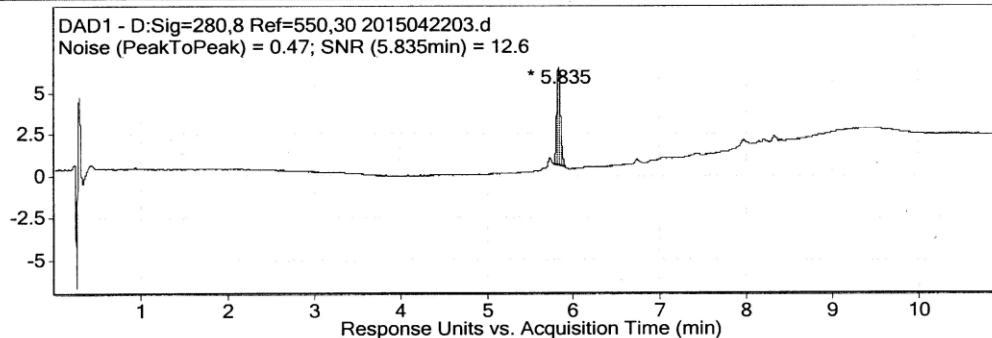

### Integration Peak List

| Peak | Start | RT    | End   | Height | Area  | Area % | Signal To Noise |
|------|-------|-------|-------|--------|-------|--------|-----------------|
| 1    | 5.773 | 5.835 | 5.915 | 5.89   | 18.38 | 100    | 12.6            |

### User Spectra

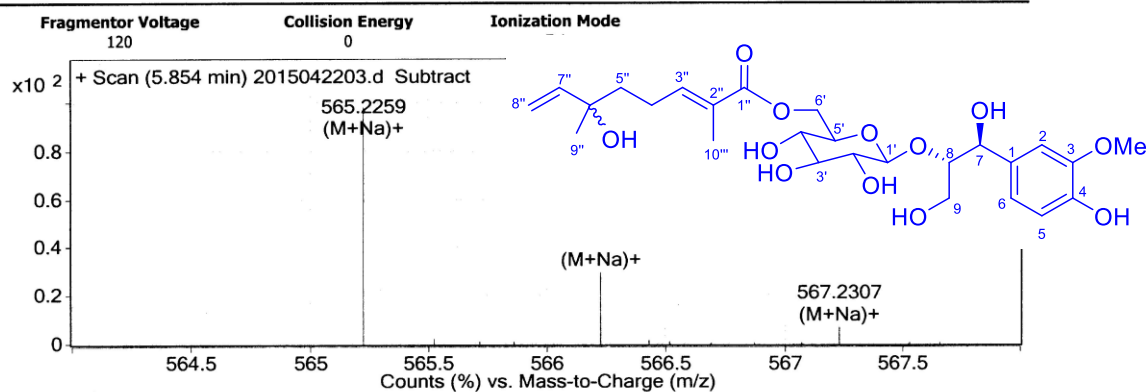

Figure S27. The HRESIMS Spectrum of Compound 3

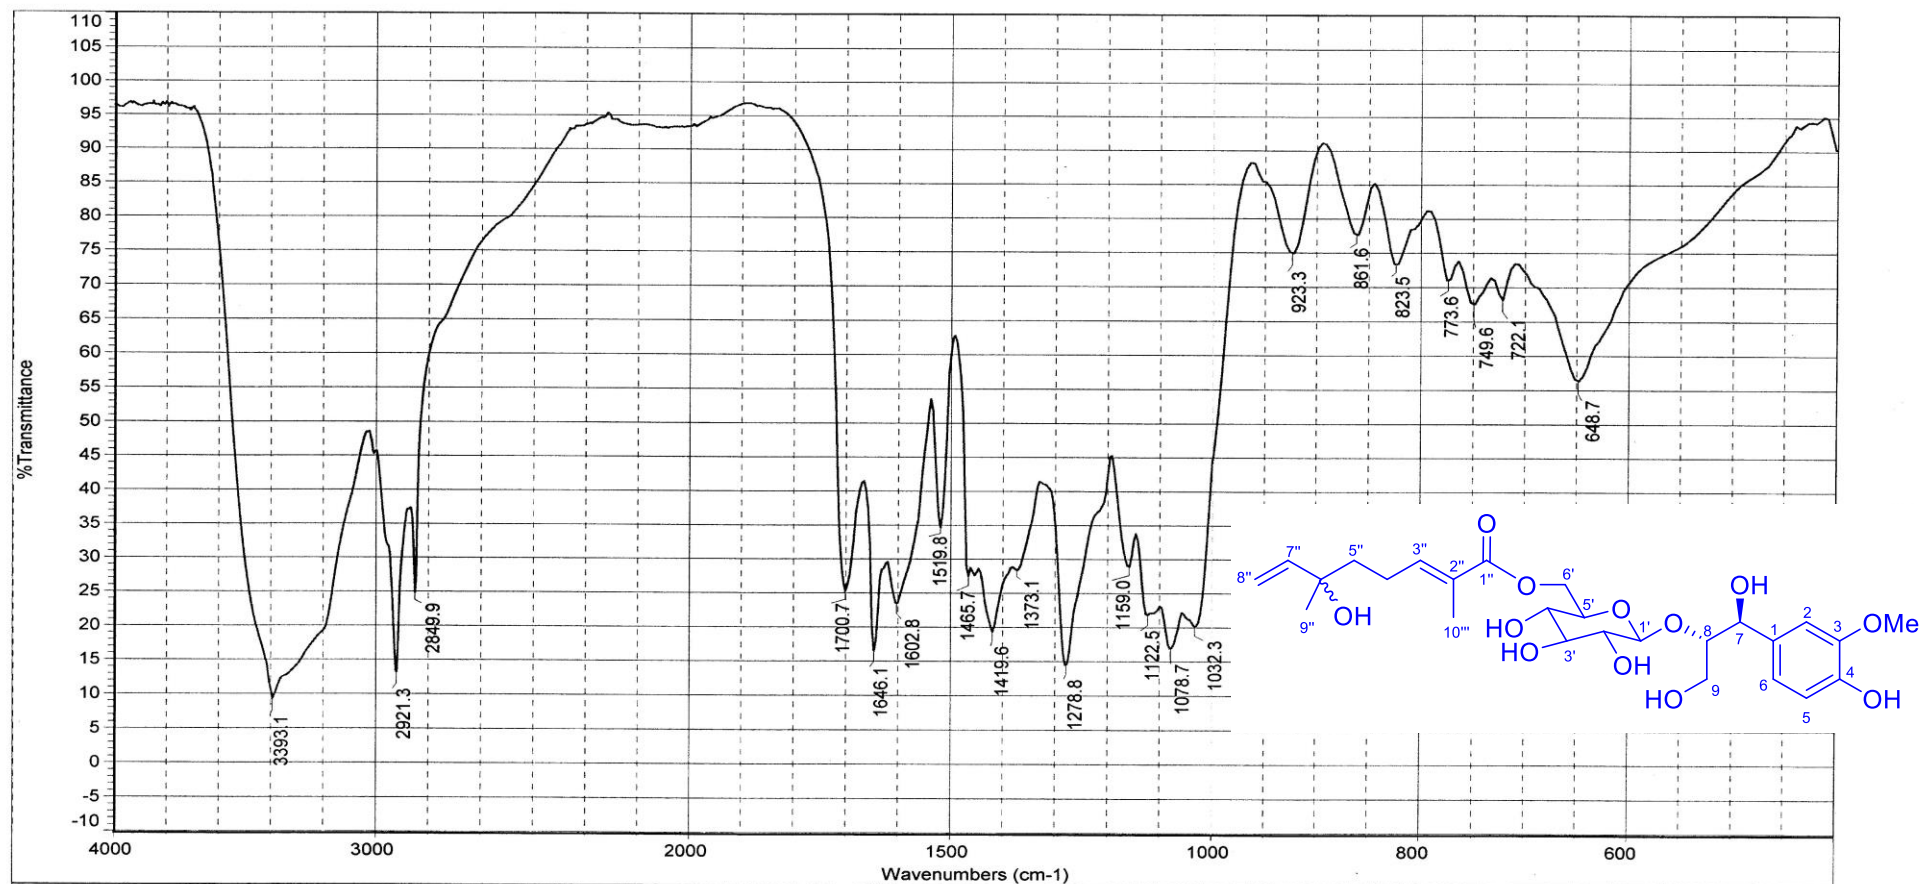

日期: 星期四 3月 12 14:03:12 2015 (GMT+08:00) Sample Name : Q - 40

(显微镜透射法FT- IR Microscope Transmission)

扫描次数: 100

傅立叶变换显微镜红外(FT-IR Microscope): Centaur $\mu$ s

分辨率: 8.000

美国热电公司(Thermo)傅立叶变换红外光谱仪:Nicolet 5700

**Figure S28. The IR Spectrum of Compound 3**



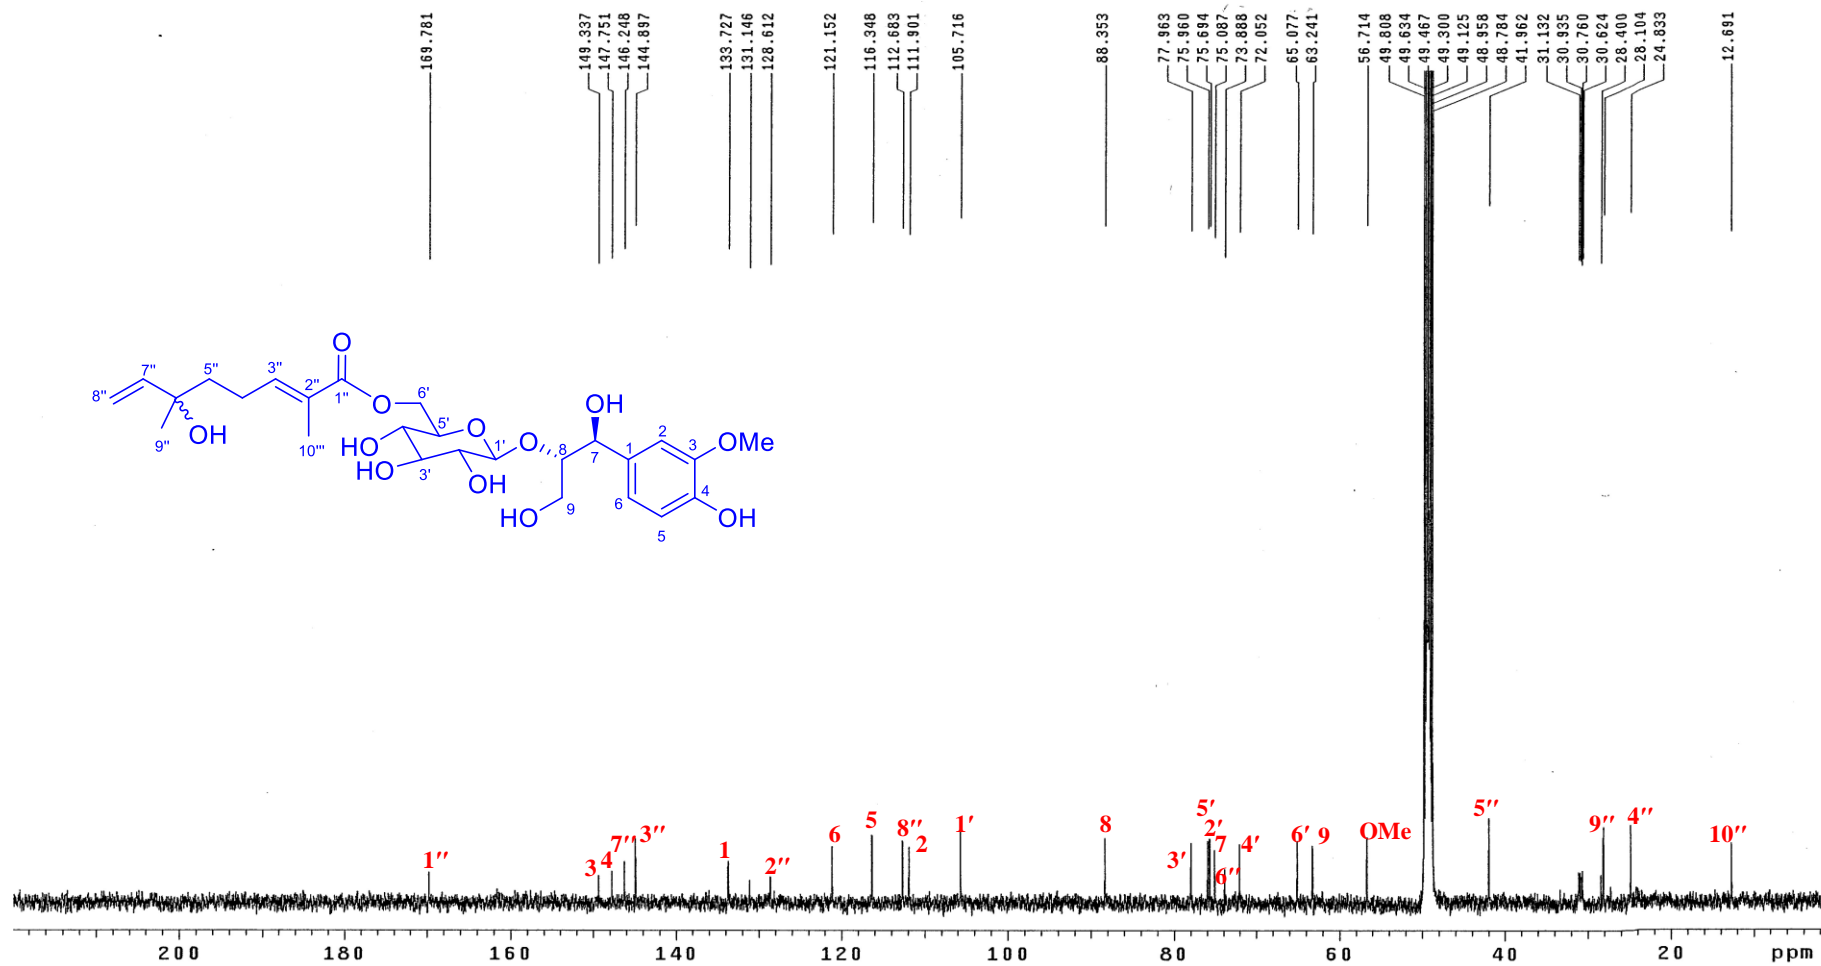

Figure S30. The  $^{13}\text{C}$  NMR Spectrum of Compound 3 in  $\text{MeOH-}d_4$  (125MHz)

DD2-500 gCOSY QYH-40 IN cd3od May 29 2014 sw

Temp. 25.0 C / 298.1 K  
Sample #4, Operator: vnmr1

Relax. delay 1.000 sec  
Acq. time 0.150 sec  
Width 4464.3 Hz  
2D Width 4464.3 Hz  
8 repetitions  
128 increments  
OBSERVE H1, 499.7694214 MHz  
DATA PROCESSING  
Sq. sine bell 0.075 sec  
F1 DATA PROCESSING  
Sq. sine bell 0.029 sec  
FT size 2048 x 2048  
Total time 20 min

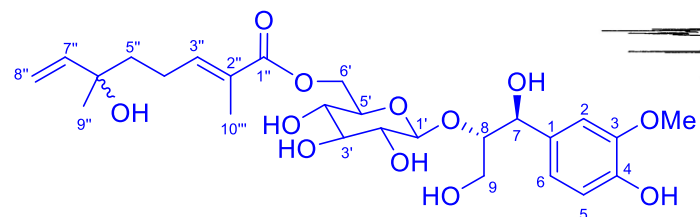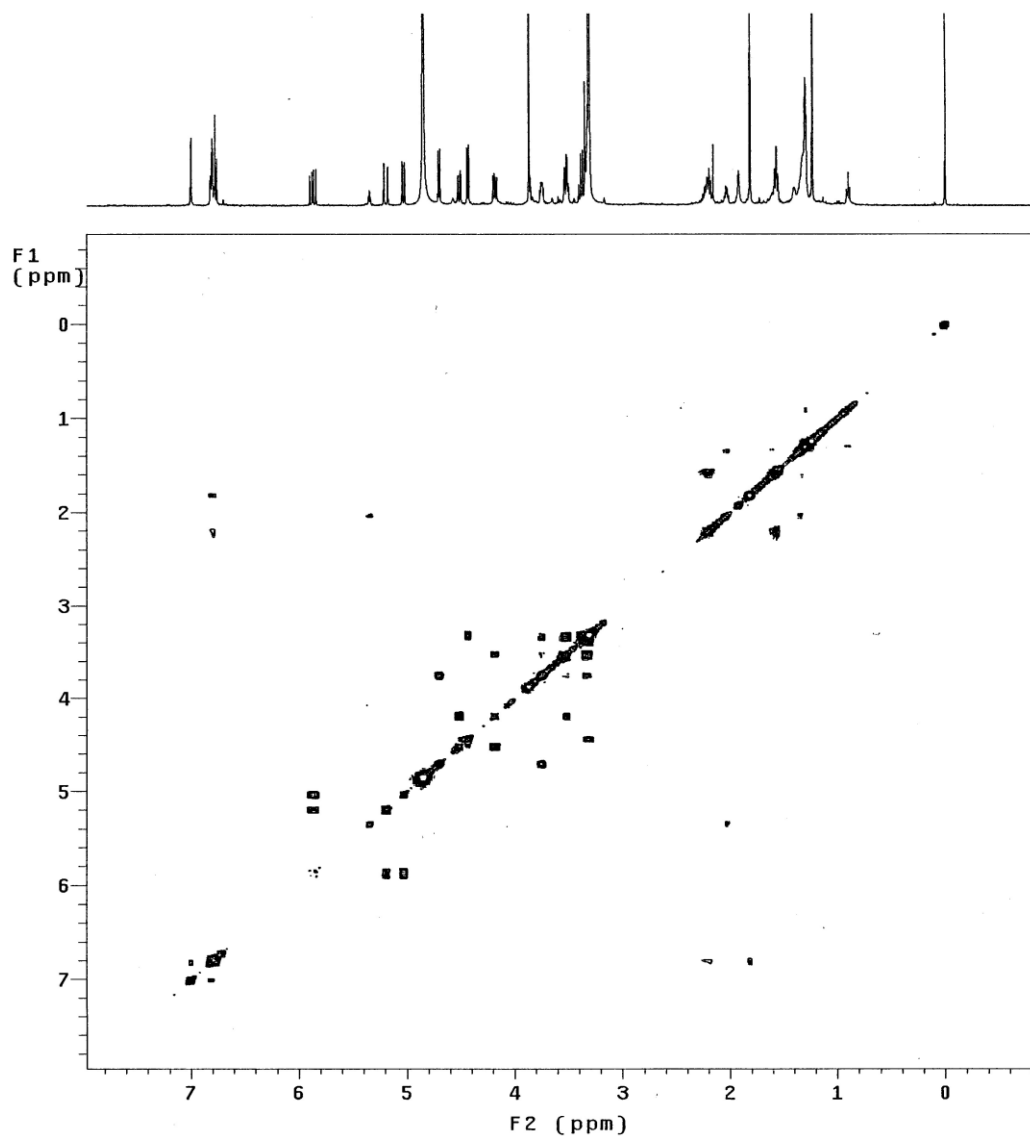

Figure S31. The  $^1\text{H}$ - $^1\text{H}$  COSY Spectrum of Compound 3 in  $\text{MeOH-}d_4$  (500MHz)

Temp. 25.0 C / 298.1 K  
 Sample #4, Operator: vnmr1  
 Relax. delay 1.000 sec  
 Acq. time 0.269 sec  
 Width 4464.3 Hz  
 2D Width 25133.5 Hz  
 16 repetitions  
 2 x 256 increments  
 OBSERVE H1, 499.7694214 MHz  
 DECOUPLE C13, 125.6784310 MHz  
 Power 40 dB  
 on during acquisition  
 off during delay  
 W40\_sw modulated  
 DATA PROCESSING  
 Gauss apodization 0.069 sec  
 F1 DATA PROCESSING  
 Gauss apodization 0.009 sec  
 FT size 4096 x 2048  
 Total time 2 hr, 44 min

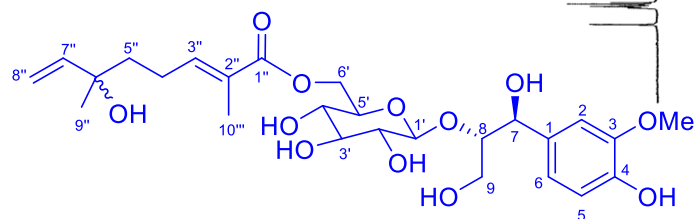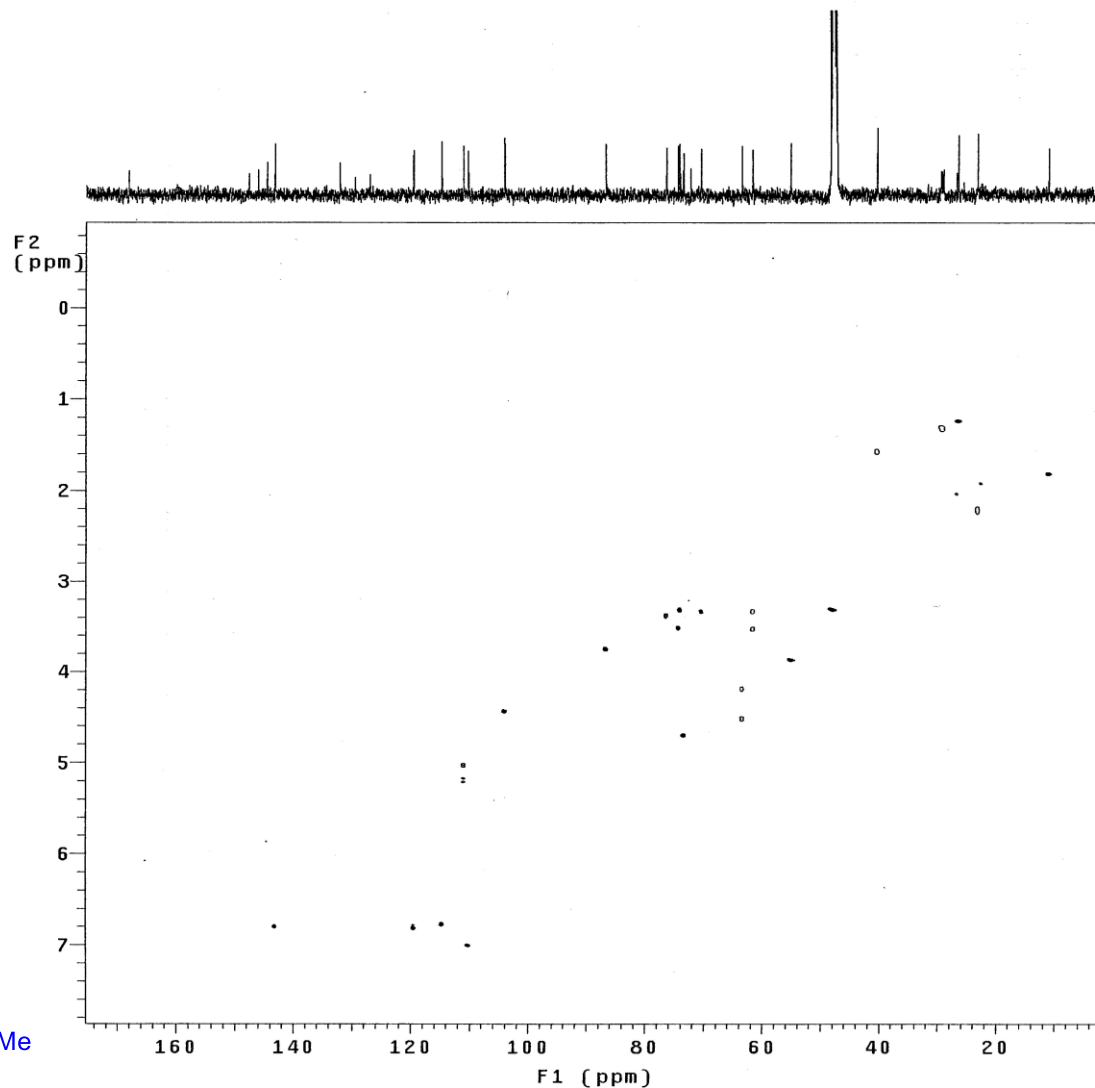

**Figure S32. The HSQC Spectrum of Compound 3 in MeOH-*d*<sub>4</sub> (500MHz)**

Temp. 25.0 C / 298.1 K  
 Sample #4, Operator: vnmr1  
 Relax. delay 1.000 sec  
 Acq. time 0.269 sec  
 Width 4464.3 Hz  
 2D Width 30154.5 Hz  
 32 repetitions  
 2 x 256 increments  
 OBSERVE H1, 499.7694214 MHz  
 DATA PROCESSING  
 Sq. sine bell 0.075 sec  
 F1 DATA PROCESSING  
 Gauss apodization 0.008 sec  
 FT size 4096 x 2048  
 Total time 5 hr, 38 min

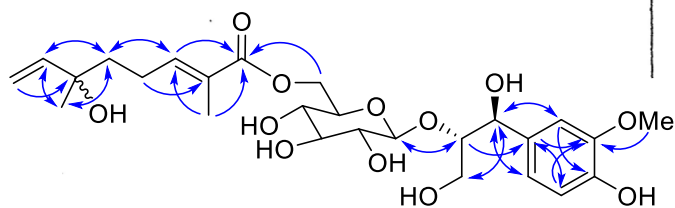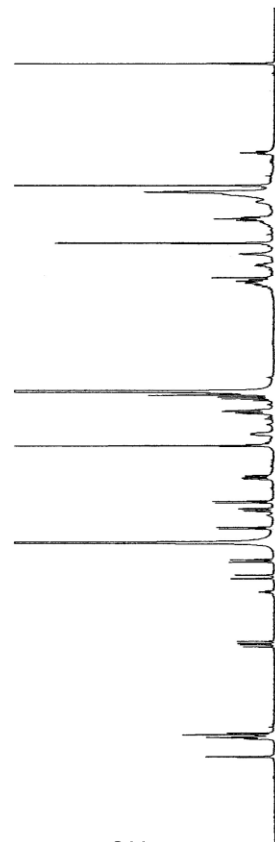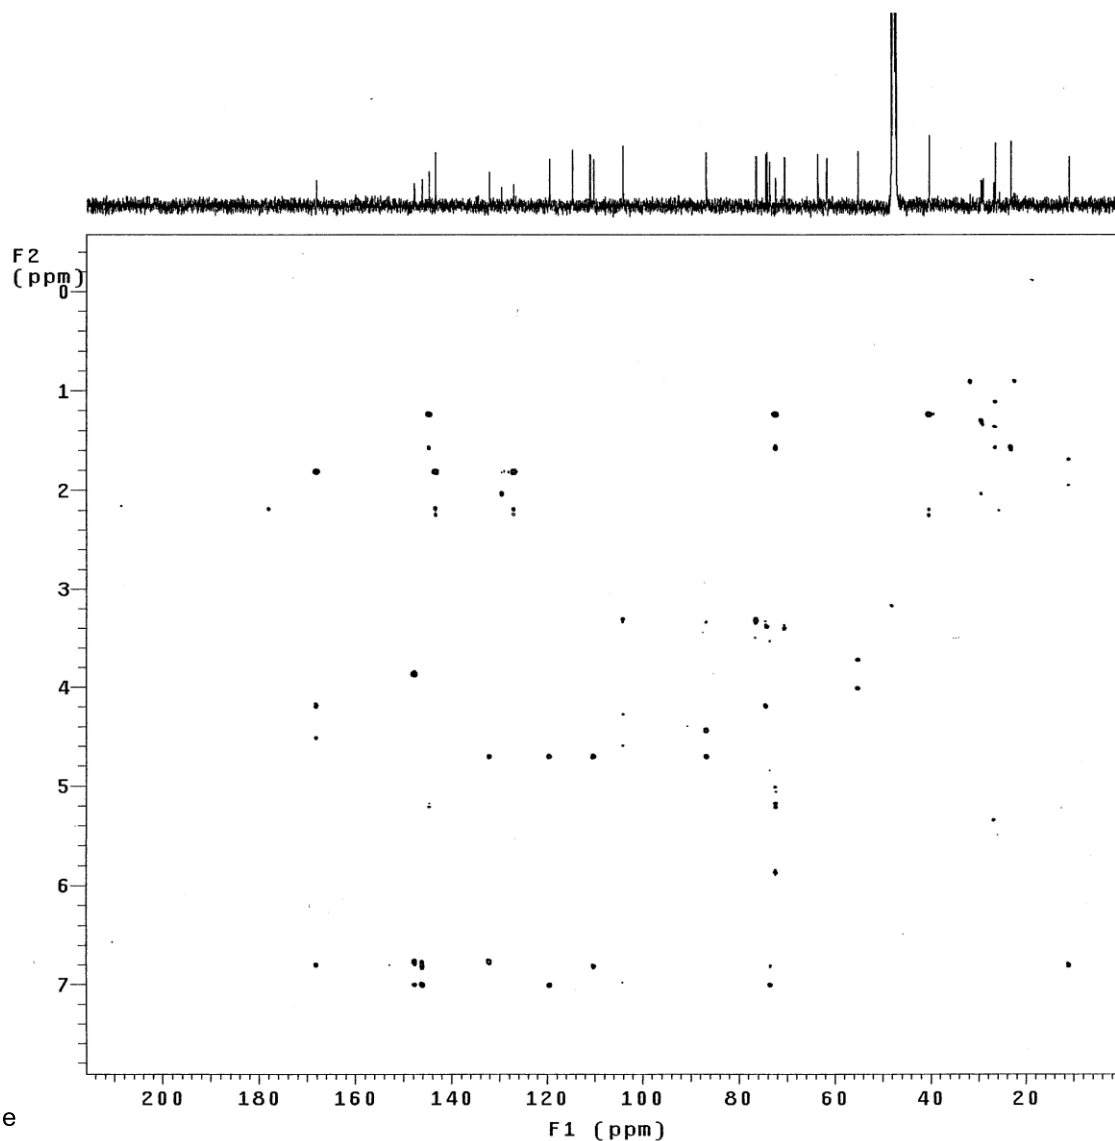

**Figure S33. The HMBC Spectrum of Compound 3 in MeOH- $d_4$  (500MHz)**

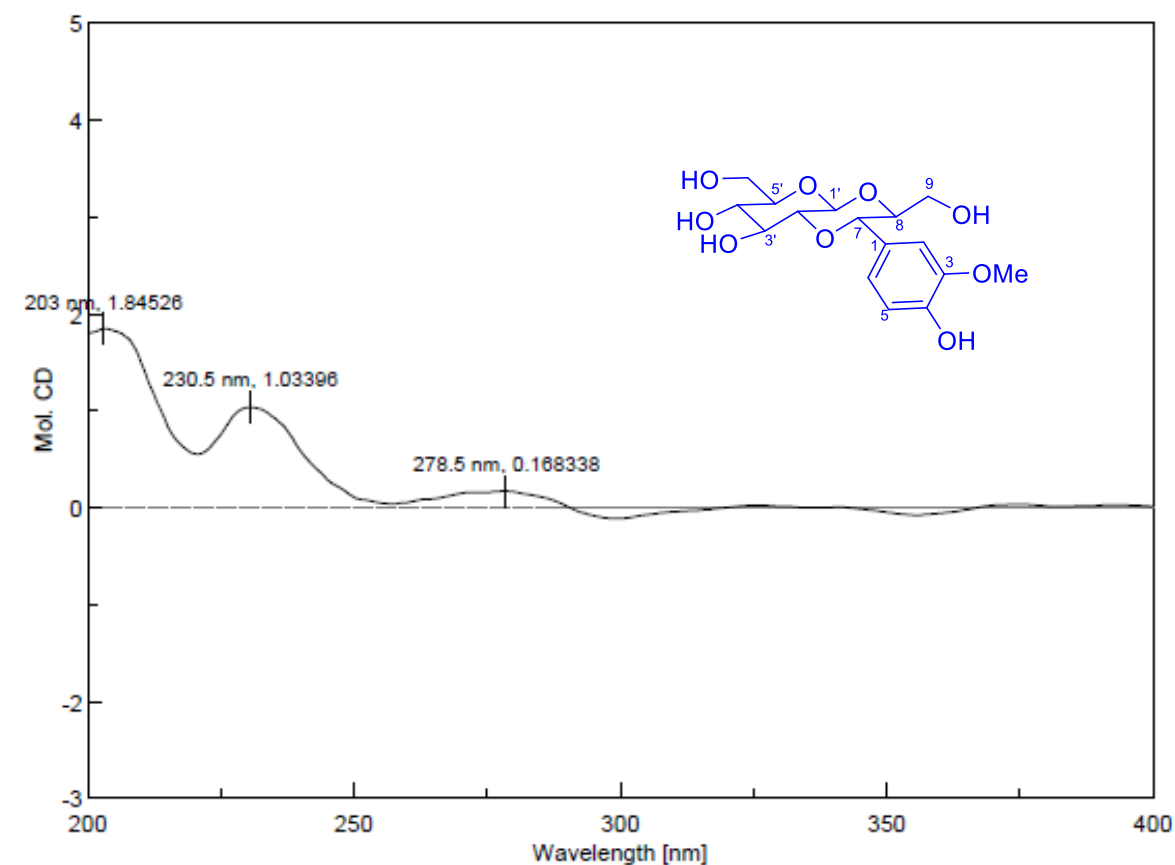

|                           |                 |                        |                       |
|---------------------------|-----------------|------------------------|-----------------------|
| [Comments]                |                 | qyh-40-2-s-m.jws       |                       |
| Sample name               | qyh-40          |                        |                       |
| Comment                   |                 |                        |                       |
| [Measurement Information] |                 |                        |                       |
| Instrument Name           | IMM-CD          |                        |                       |
| Operator                  | JMM             |                        |                       |
| Serial No.                | A024461168      |                        |                       |
| Accessory                 | Standard        |                        |                       |
| Accessory S/N             | A024461168      |                        |                       |
| Cell Length               | 0.1 mm          | [Detailed Information] |                       |
| Measurement date          | 2016-8-23 12:04 | Creation date          | 2016-8-23 13:45       |
| Photometric Mode          | CD, HT, Abs     | Data array type        | Linear data array * 3 |
| Measure Range             | 500 - 200 nm    | Horizontal axis        | Wavelength [nm]       |
| Data pitch                | 0.5 nm          | Vertical axis(1)       | Mol. CD               |
| Sensitivity               | Standard        | Vertical axis(2)       | HT [V]                |
| D.I.T.                    | 1 sec           | Vertical axis(3)       | Abs                   |
| Bandwidth                 | 2.00 nm         | Start                  | 500 nm                |
| Start Mode                | Immediately     | End                    | 200 nm                |
| Scanning Speed            | 100 nm/min      | Data interval          | 0.5 nm                |
| Baseline Correction       | Baseline        | Data points            | 601                   |
| Shutter Control           | Auto            |                        |                       |
| CD Detector               | PMT             |                        |                       |
| PMT Voltage               | Auto            |                        |                       |
| Accumulations             | 2               |                        |                       |
| Solvent                   | MEOH            |                        |                       |
| Concentration             | 0.13 (w/v)%     |                        |                       |

**Figure S34. The CD Spectrum of Compound 3a in MeOH**

PROTON CD3OD D:\\ DATA2015 5

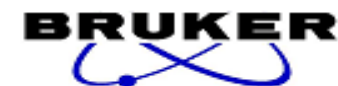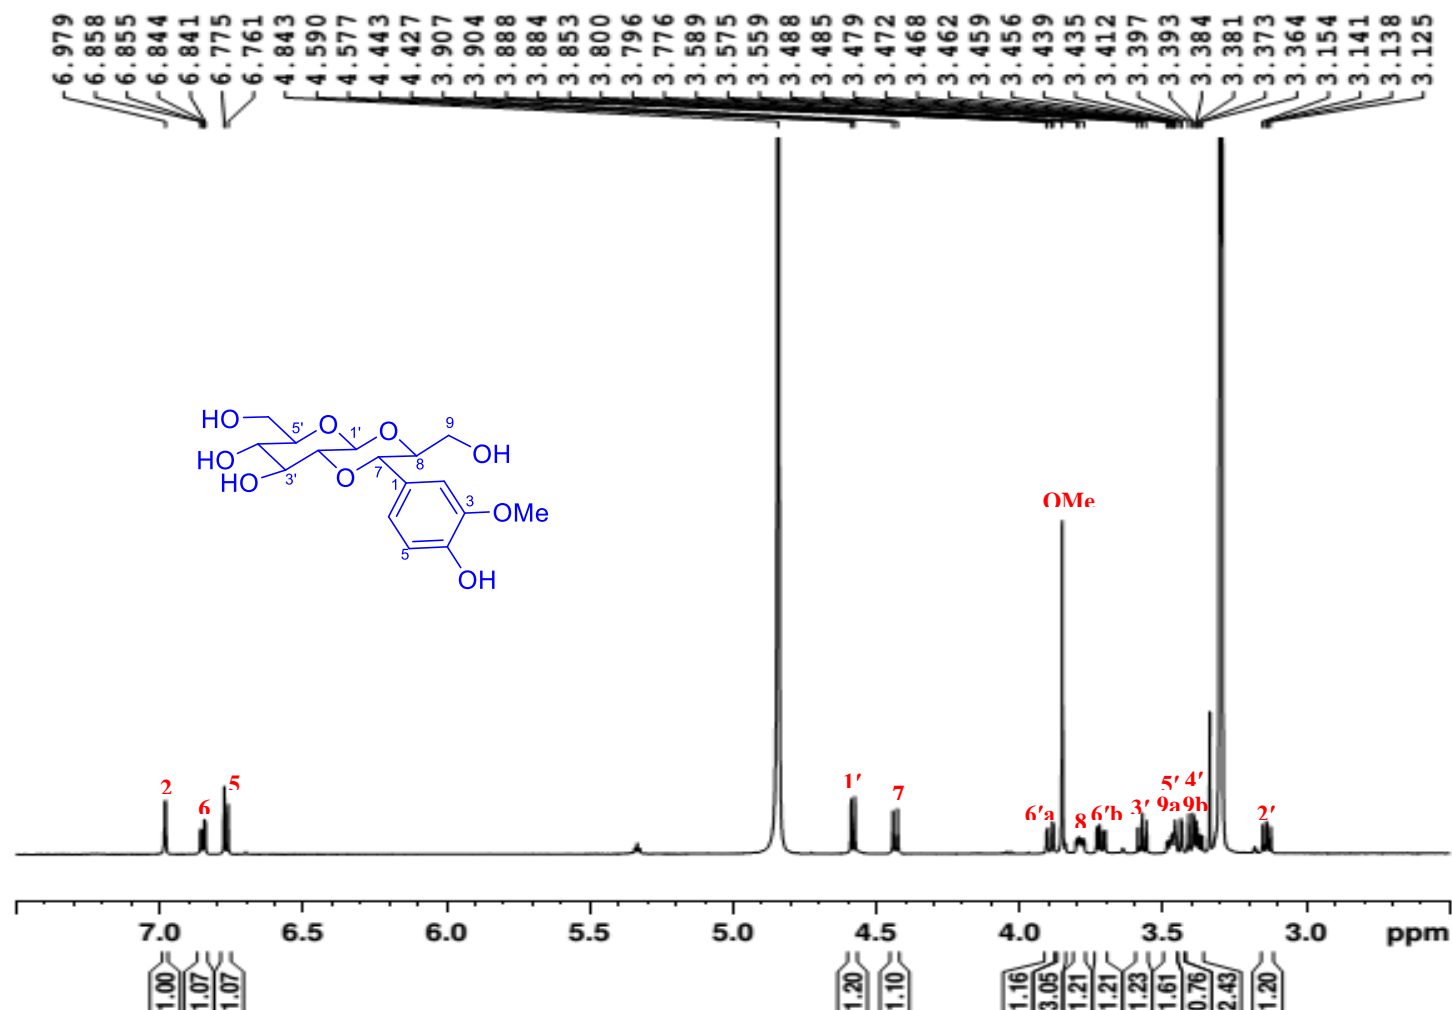

```

NAME      20151229  qyh-
EXPNO     1
PROCNO    1
Date_     20151229
Time      11.45
INSTRUM   spect
PROBHD    5 mm CPDCH 13C
PULPROG   zg30
TD         65536
SOLVENT   CD3OD
NS         16
DS         2
SWH        12019.230
FIDRES     0.183396
AQ         2.7263477
RG         51
DM         41.600
DE         20.00
TE         298.1
D1         1.00000000
TD0        1

===== CHANNEL f1 =====
SFO1      600.2537068
NUC1       13
P1         11.50
SI         65536
SF         600.2499877
WDW        EM
SSB        0
LB         0.30
GB         0
PC         1.00
  
```

Figure S35. The  $^1\text{H}$  NMR Spectrum of Compound 3a in  $\text{MeOH-}d_4$  (600MHz)

NAME: 20160119 qyh-4  
C13 CD3OD D:\\ DATA2016 28

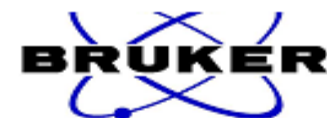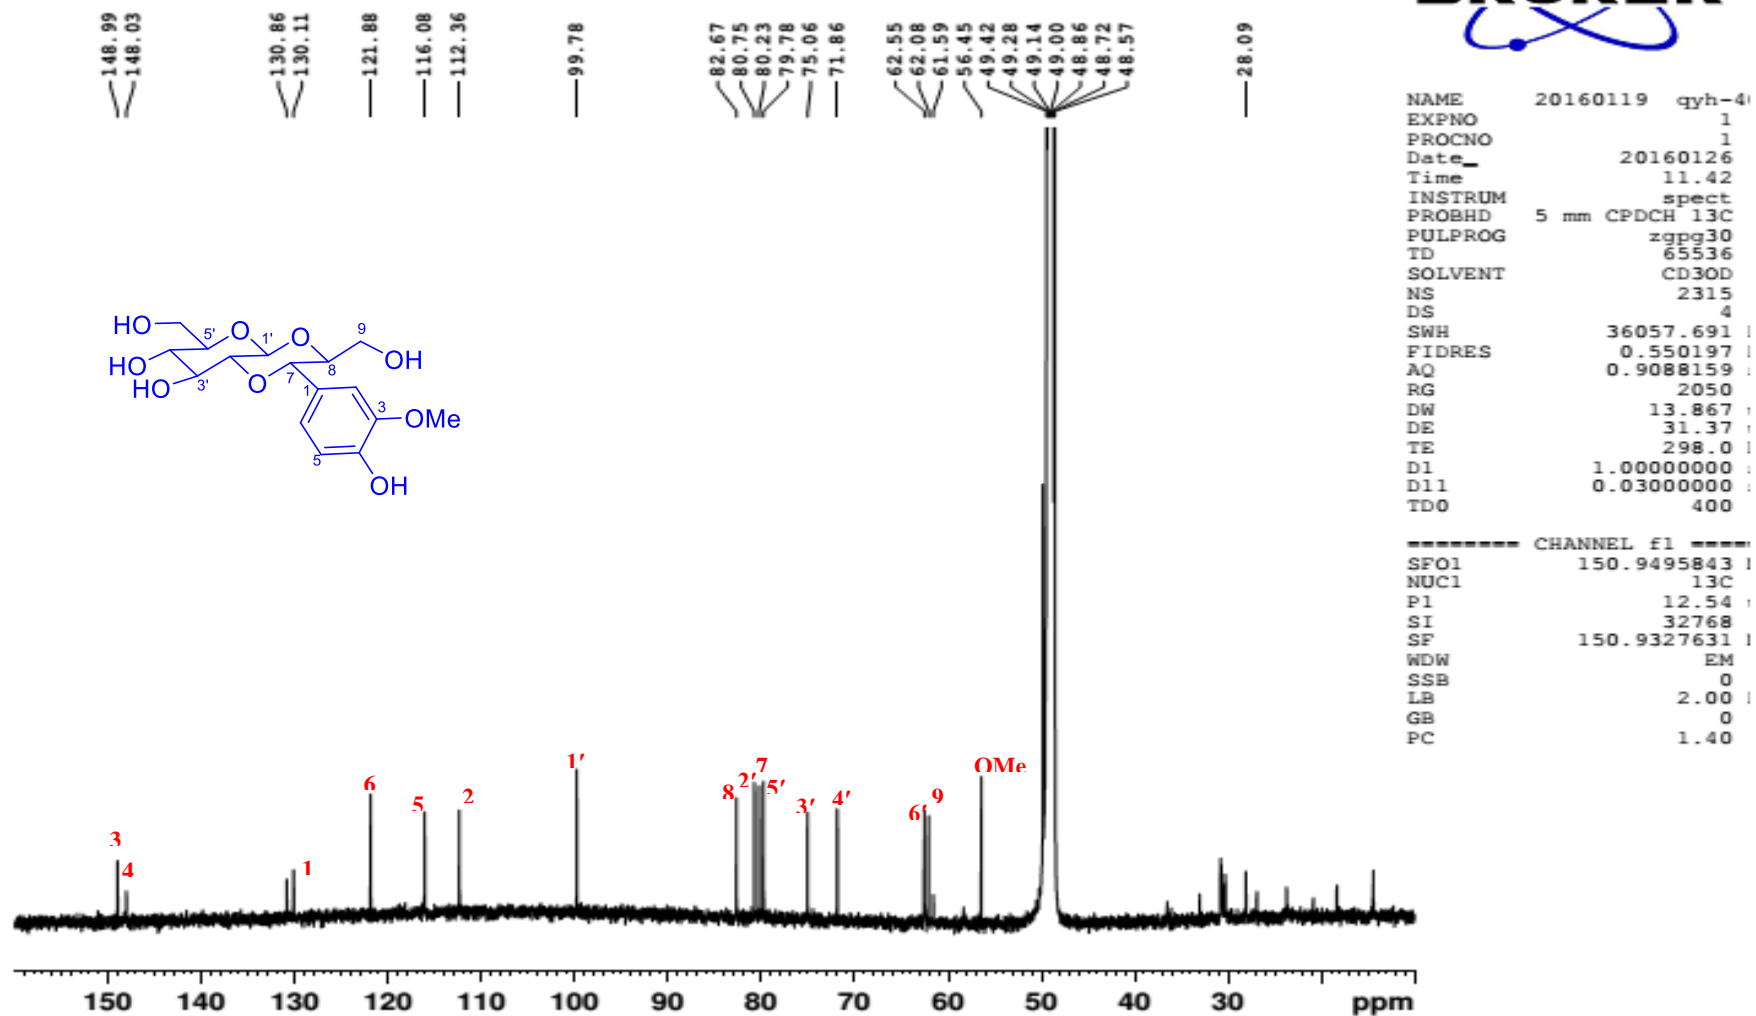

Figure S36. The <sup>13</sup>C NMR Spectrum of Compound 3a in MeOH-*d*<sub>4</sub> (150MHz)

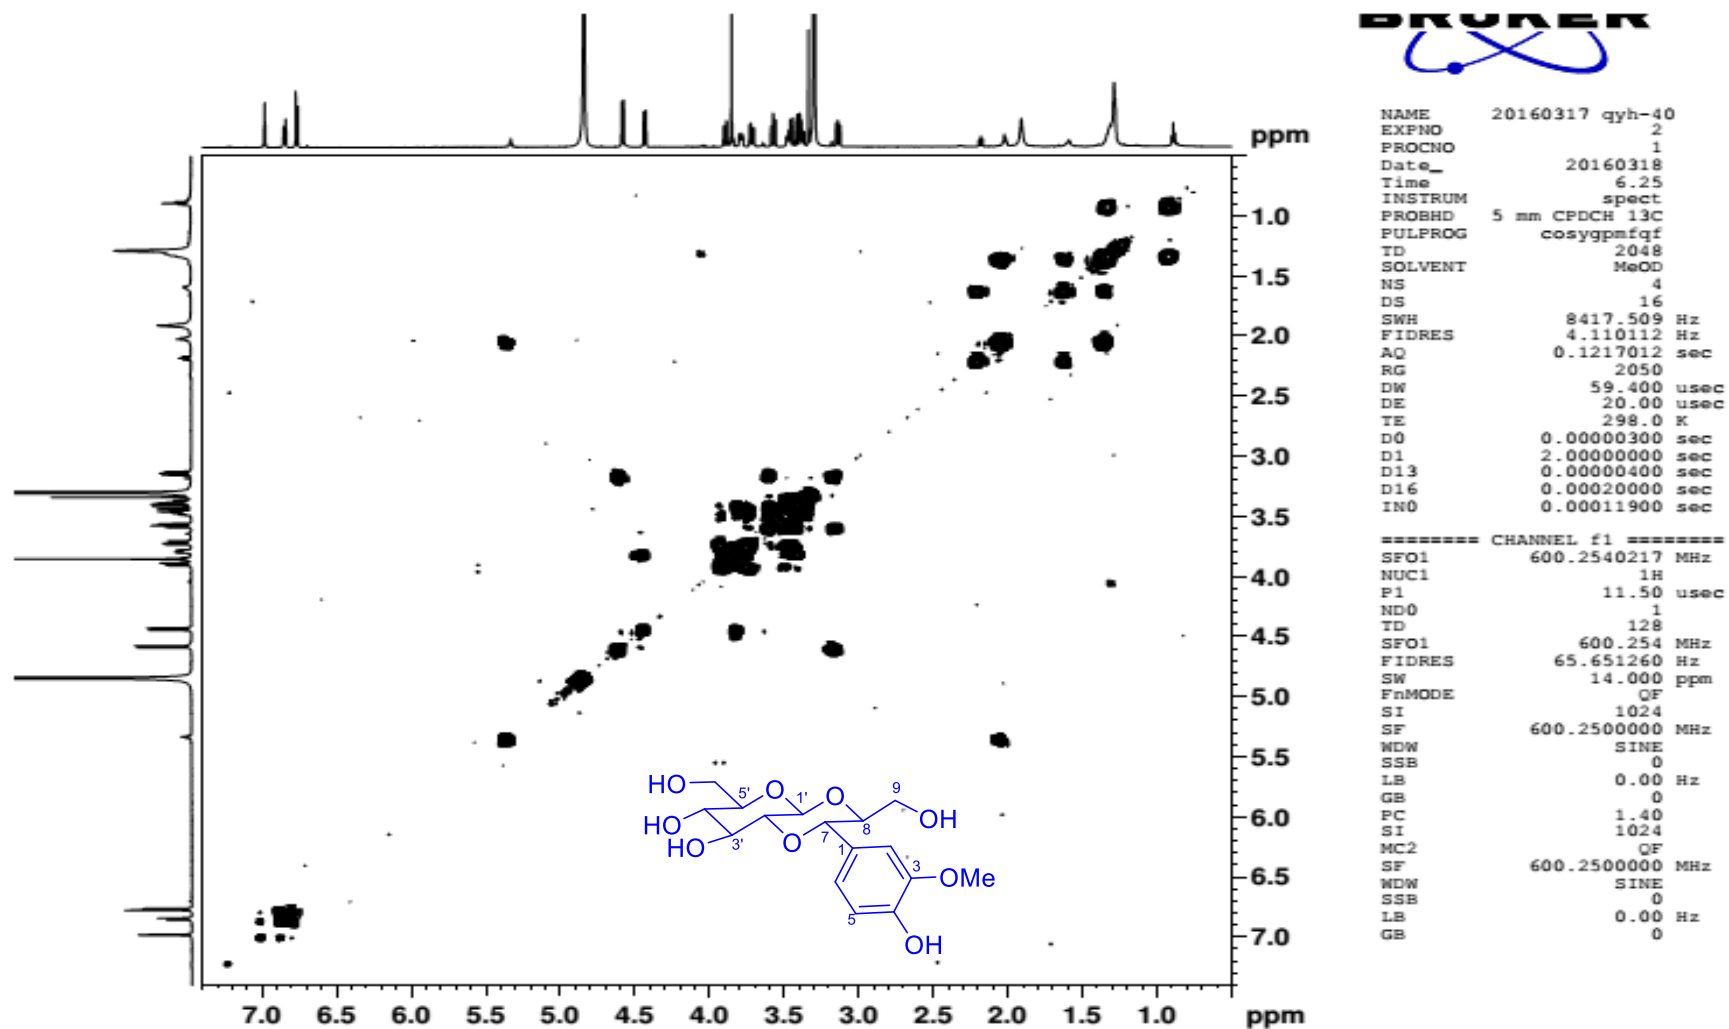

Figure S37. The  $^1\text{H}$ - $^1\text{H}$  COSY Spectrum of Compound 3a in  $\text{MeOH-}d_4$  (600MHz)

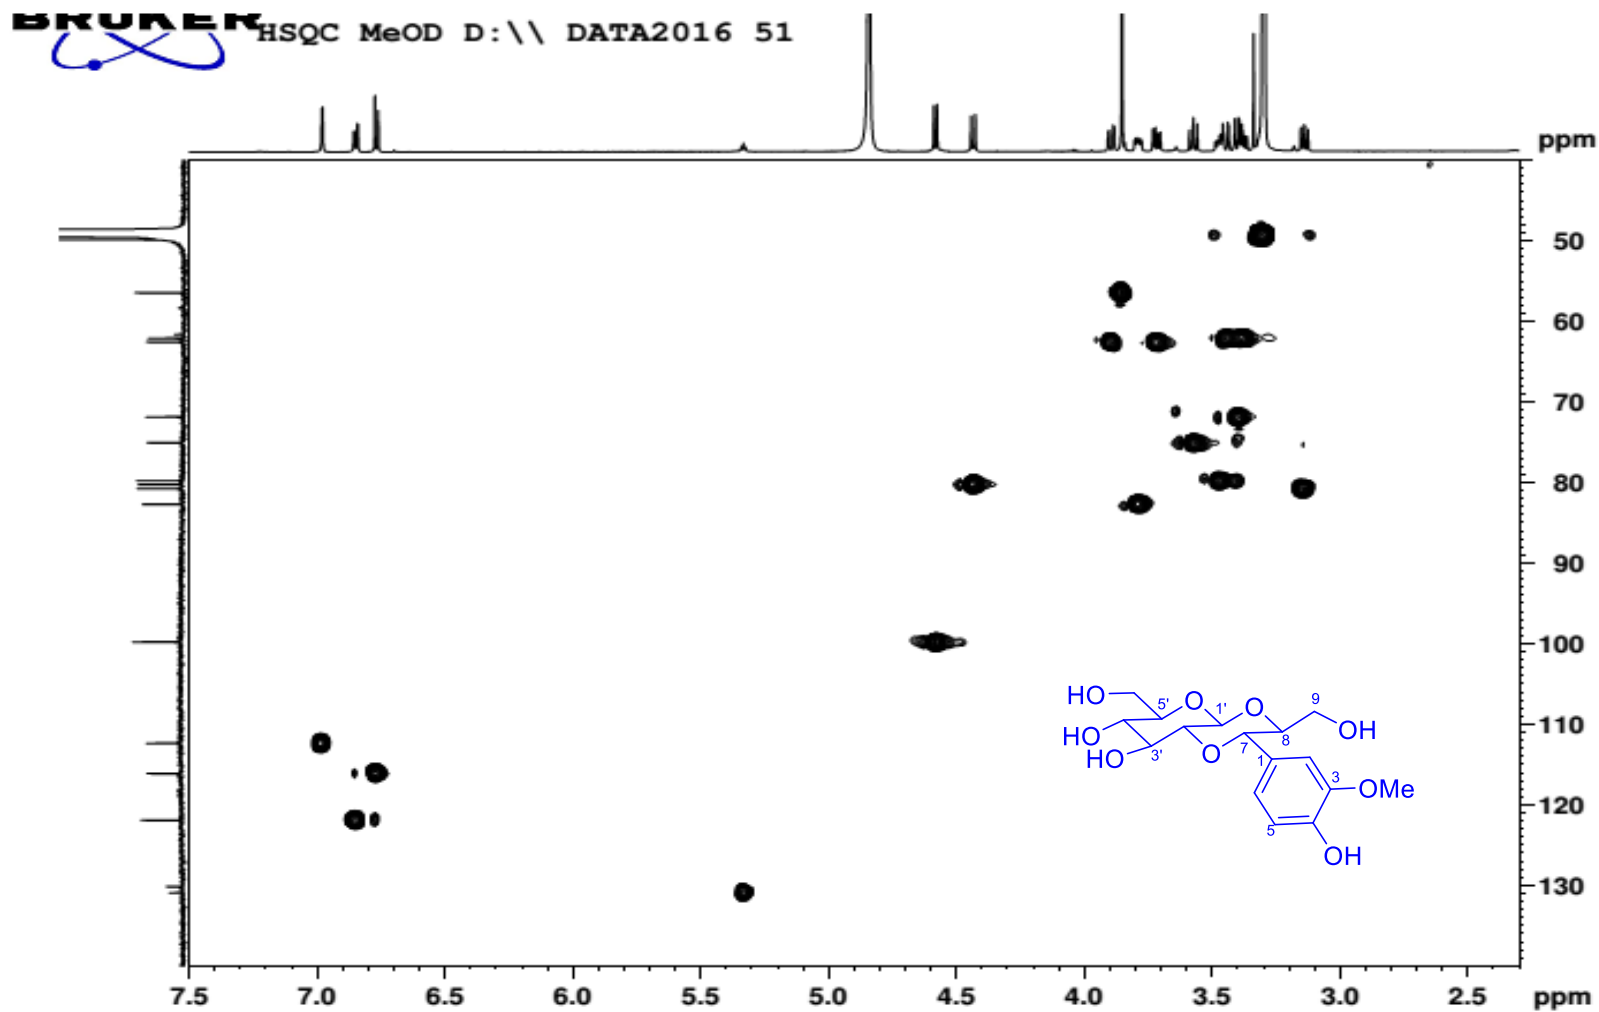

Figure S38. The HSQC Spectrum of Compound 3a in MeOH- $d_4$  (500MHz)

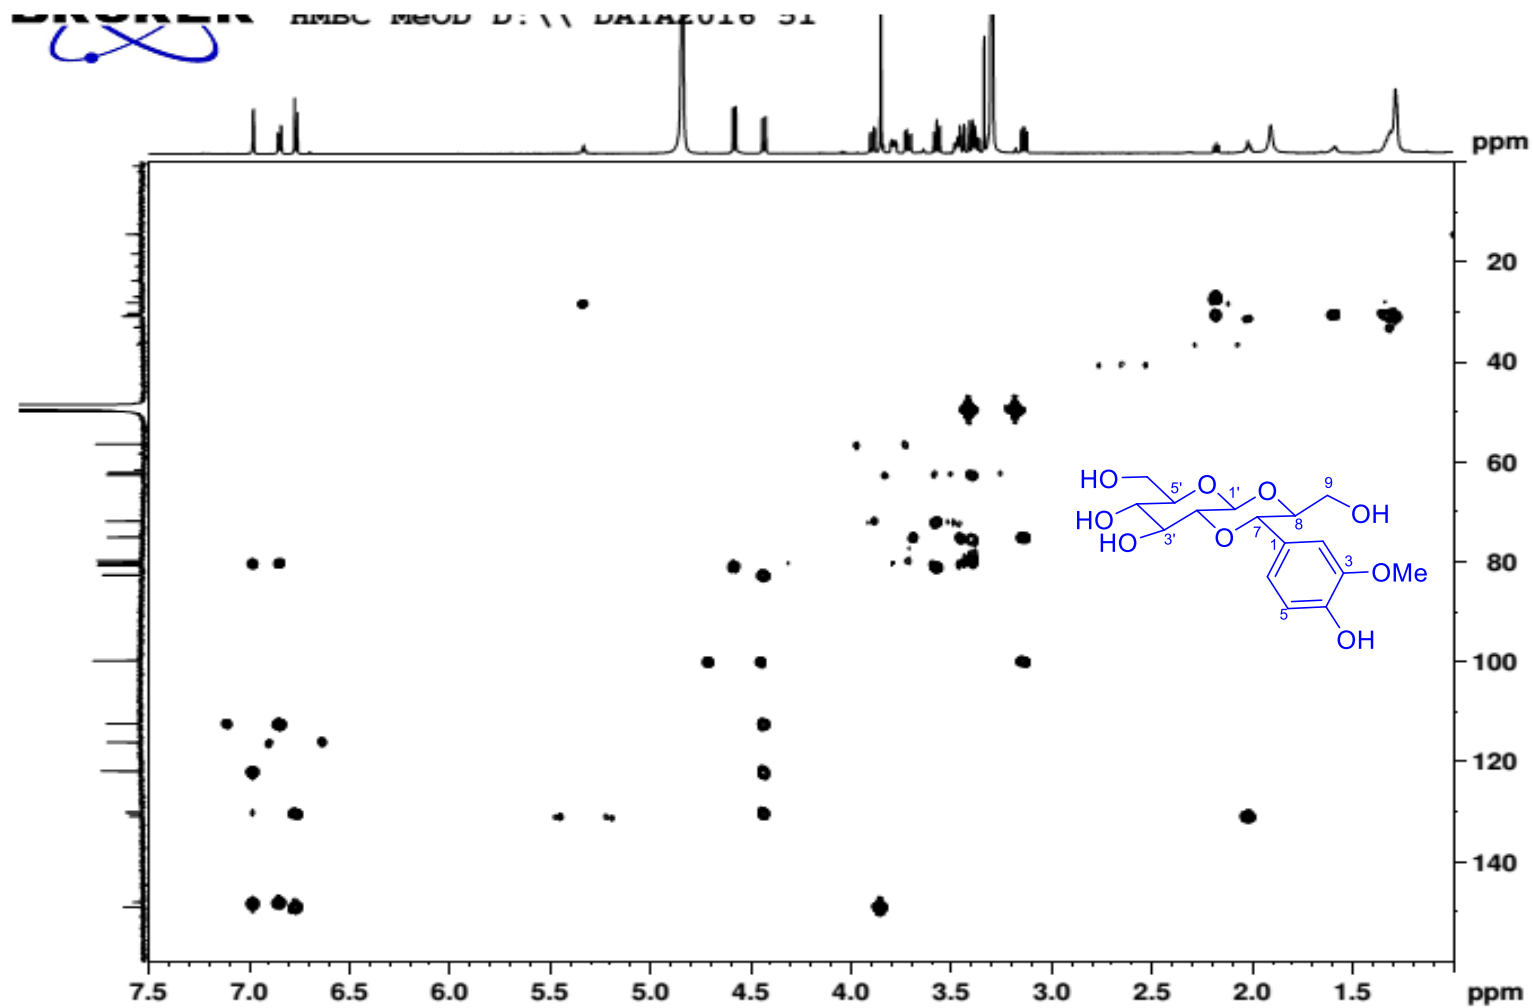

Figure S39. The HMBC Spectrum of Compound 3a in MeOH- $d_4$  (600MHz)

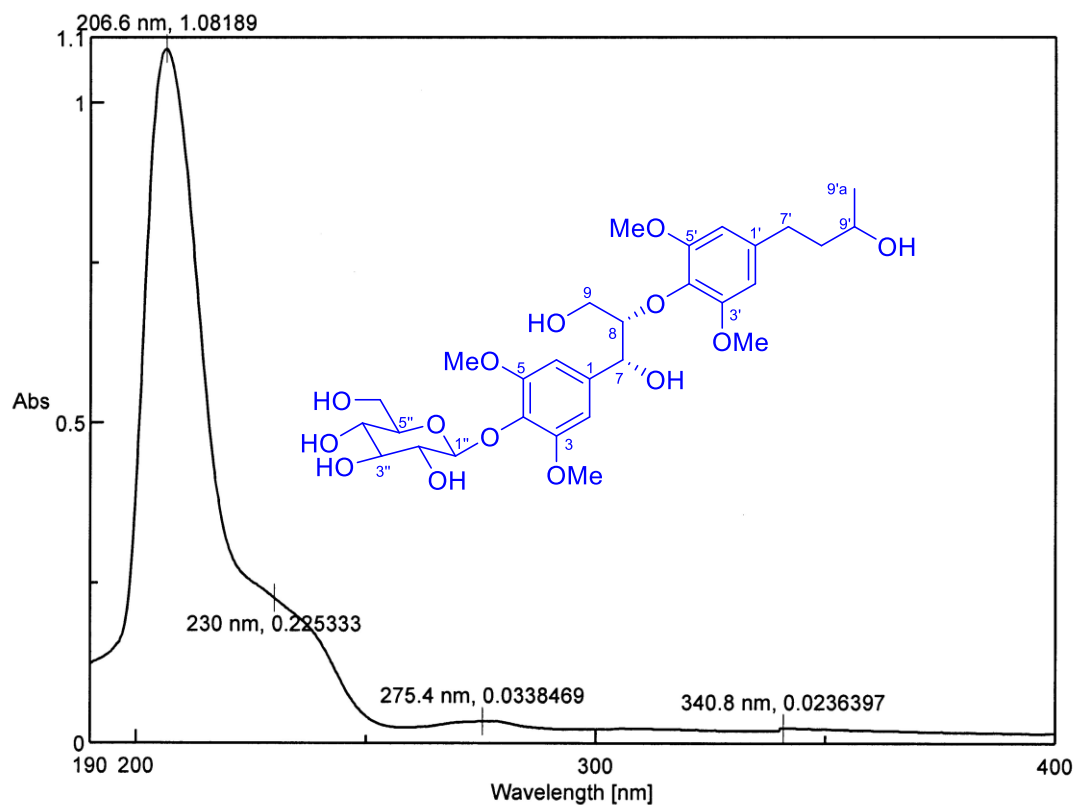

[Comment]  
 Sample Name sjj-w37  
 Comment 0.02  
 User  
 Division UV  
 Company 324  
 [Measurement Information]  
 Instrument Name V-650  
 Model Name V-650  
 Serial No. A034461150

Accessory PSC-718  
 Accessory S/N A001761114  
 Position 1  
 Cell Length 10 mm  
 Temperature 19.95 C  
 Control Sensor Holder  
 Monitor Sensor Holder  
 Start Mode Start immediately

Photometric Mode Abs  
 Measurement range 400 - 190 nm  
 Data pitch 0.2 nm  
 Band width(UV/Vis) 2.0 nm  
 Response Medium  
 Scanning speed 200 nm/min  
 Source Change 340 nm  
 Light Source D2/WI  
 Filter Exchange Step  
 Correction Baseline

[Data Information]  
 Creation Date 2014-11-18 21:04  
 Data array type Linear data array  
 Horizontal Wavelength [nm]  
 Vertical Abs  
 Start 400 nm  
 End 190 nm  
 Data pitch 0.2 nm  
 Data points 1051

**Figure S40. The UV Spectra of Compound 4 in MeOH**

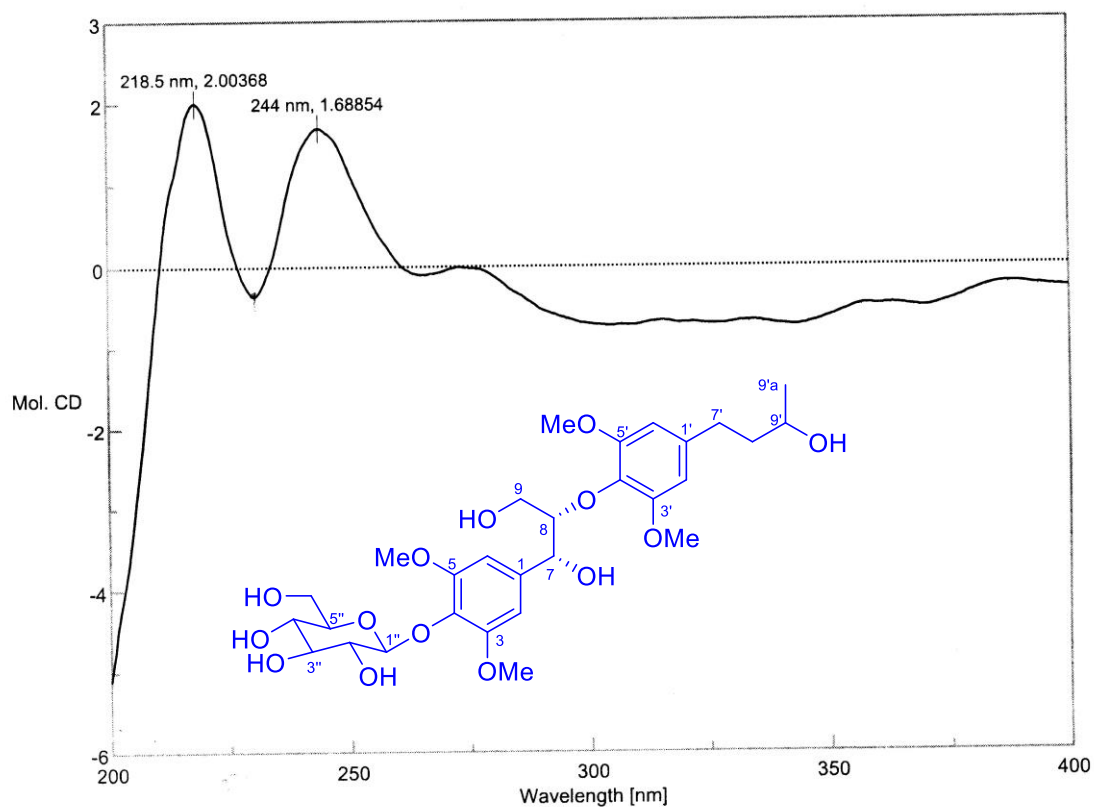

[Comments]  
 Sample name sjj-w37  
 Comment  
 User  
 Division  
 Company dell

[Measurement Information]  
 Instrument Name J-815  
 Model Name J-815  
 Serial No. A024461168

Accessory Standard  
 Accessory S/N A024461168  
 Cell Length 1 mm

Photometric Mode CD, HT, Abs  
 Measure Range 400 - 200 nm  
 Data pitch 0.5 nm  
 Sensitivity Standard  
 D.I.T. 1 sec  
 Band width 2.00 nm  
 Start Mode Immediately  
 Scanning Speed 100 nm/min  
 Baseline Correction Baseline  
 Shutter Control Auto  
 PMT Voltage Auto  
 Accumulations 2  
 Solvent MEOH  
 Concentration 0.07 (w/v)%

[Detailed Information]  
 Creation date 2015-9-14 16:30

Data array type Linear data array \* 3  
 Horizontal axis Wavelength [nm]  
 Vertical axis(1) Mol. CD  
 Vertical axis(2) HT [V]  
 Vertical axis(3) Abs  
 Start 400 nm  
 End 200 nm  
 Data interval 0.5 nm  
 Data points 401

**Figure S41. The CD Spectrum of Compound 4 in MeOH**

# Single Mass Spectrum Deconvolution Report

**Analysis Name:** WLYAN000.d

**Instrument:** LC-MSD-Trap-SL

**Print Date:** 9/23/2014 11:56:49 AM

**Method:** standby.m

**Operator:** Operator

**Acq. Date:** 9/23/2014 11:52:34 AM

**Sample Name:** Sjj-w-37

**Analysis Info:**

## Acquisition Parameter:

|                 |            |                       |            |                |           |
|-----------------|------------|-----------------------|------------|----------------|-----------|
| Mass Range Mode | Std/Normal | Trap Drive            | 36.3       | Scan Begin     | 100 m/z   |
| Ion Polarity    | Positive   | Octopole RF Amplitude | 171.0 Vpp  | Scan End       | 800 m/z   |
| Ion Source Type | ESI        | Capillary Exit        | 115.0 Volt | Averages       | 5 Spectra |
| Dry Temp (Set)  | 330 °C     | Skimmer               | 40.0 Volt  | Max. Accu Time | 200000 µs |
| Nebulizer (Set) | 40.00 psi  | Oct 1 DC              | 12.00 Volt | ICC Target     | 20000     |
| Dry Gas (Set)   | 9.00 l/min | Oct 2 DC              | 1.70 Volt  | Charge Control | on        |

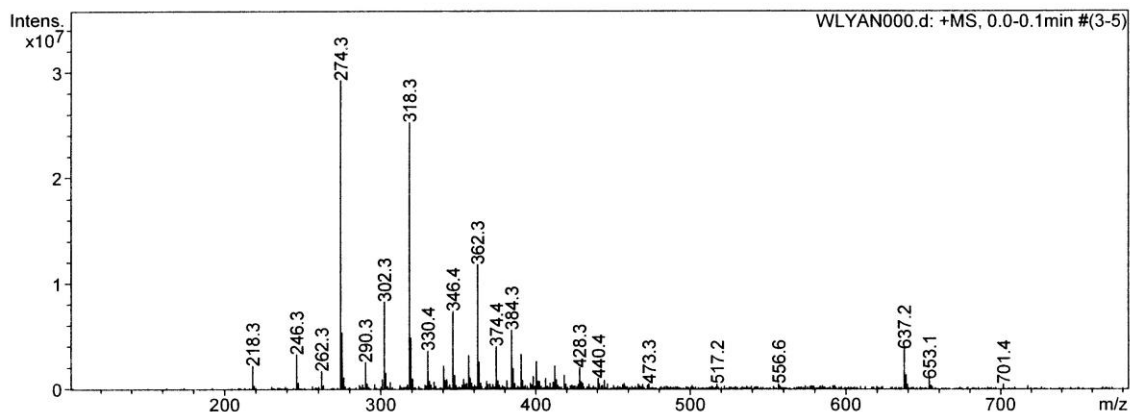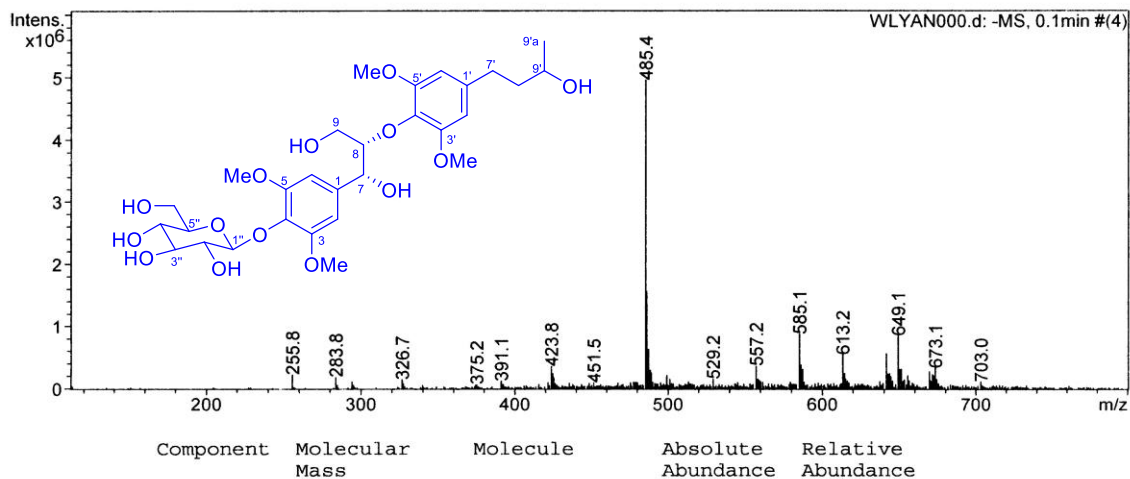

**Figure S42. The ESIMS Spectrum of Compound 4**

## Qualitative Analysis Report

|                        |              |                               |         |
|------------------------|--------------|-------------------------------|---------|
| <b>Data Filename</b>   | 2014102701.d | <b>Sample Name</b>            | AJJ-W37 |
| <b>Sample Type</b>     | Sample       | <b>Position</b>               | P1-C6   |
| <b>Instrument Name</b> | Instrument 1 | <b>User Name</b>              |         |
| <b>Acq Method</b>      |              | <b>IRM Calibration Status</b> |         |
| <b>DA Method</b>       | TEST LCMS.m  | <b>Comment</b>                |         |

### User Chromatograms

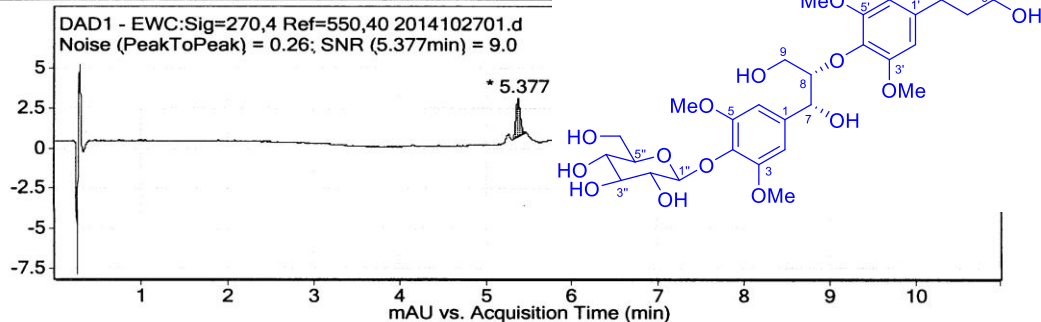

### Integration Peak List

| Peak | Start | RT    | End   | Height | Area  | Area % | Signal To Noise |
|------|-------|-------|-------|--------|-------|--------|-----------------|
| 1    | 5.323 | 5.377 | 5.476 | 2.36   | 8.762 | 100    | 9               |

Fragmentor Voltage 135 Collision Energy 0 Ionization Mode ESI

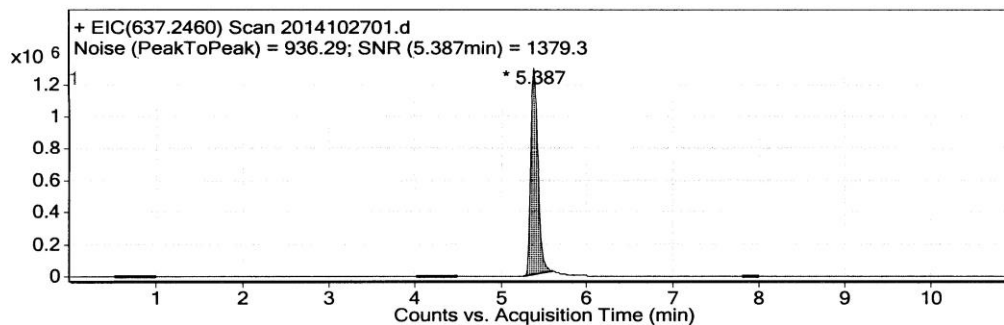

### Integration Peak List

| Peak | Start | RT    | End   | Height  | Area    | Area % | Signal To Noise |
|------|-------|-------|-------|---------|---------|--------|-----------------|
| 1    | 5.258 | 5.387 | 5.612 | 1291433 | 7733713 | 100    | 1379.3          |

### User Spectra

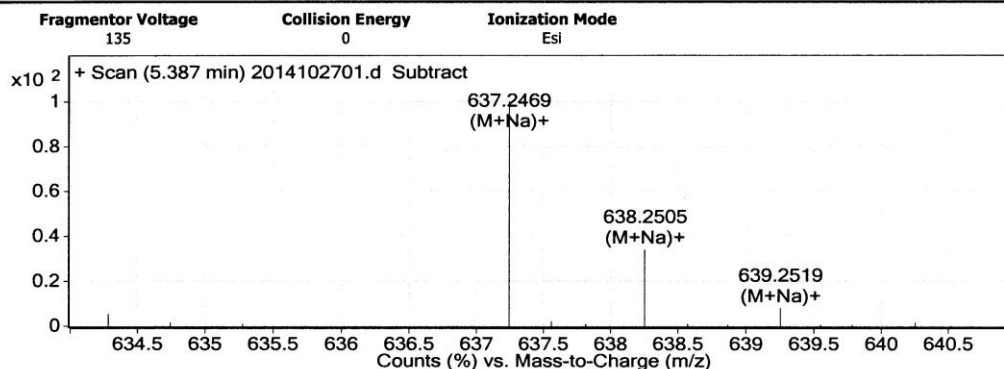

**Figure S43. The HRESIMS Spectrum of Compound 4**

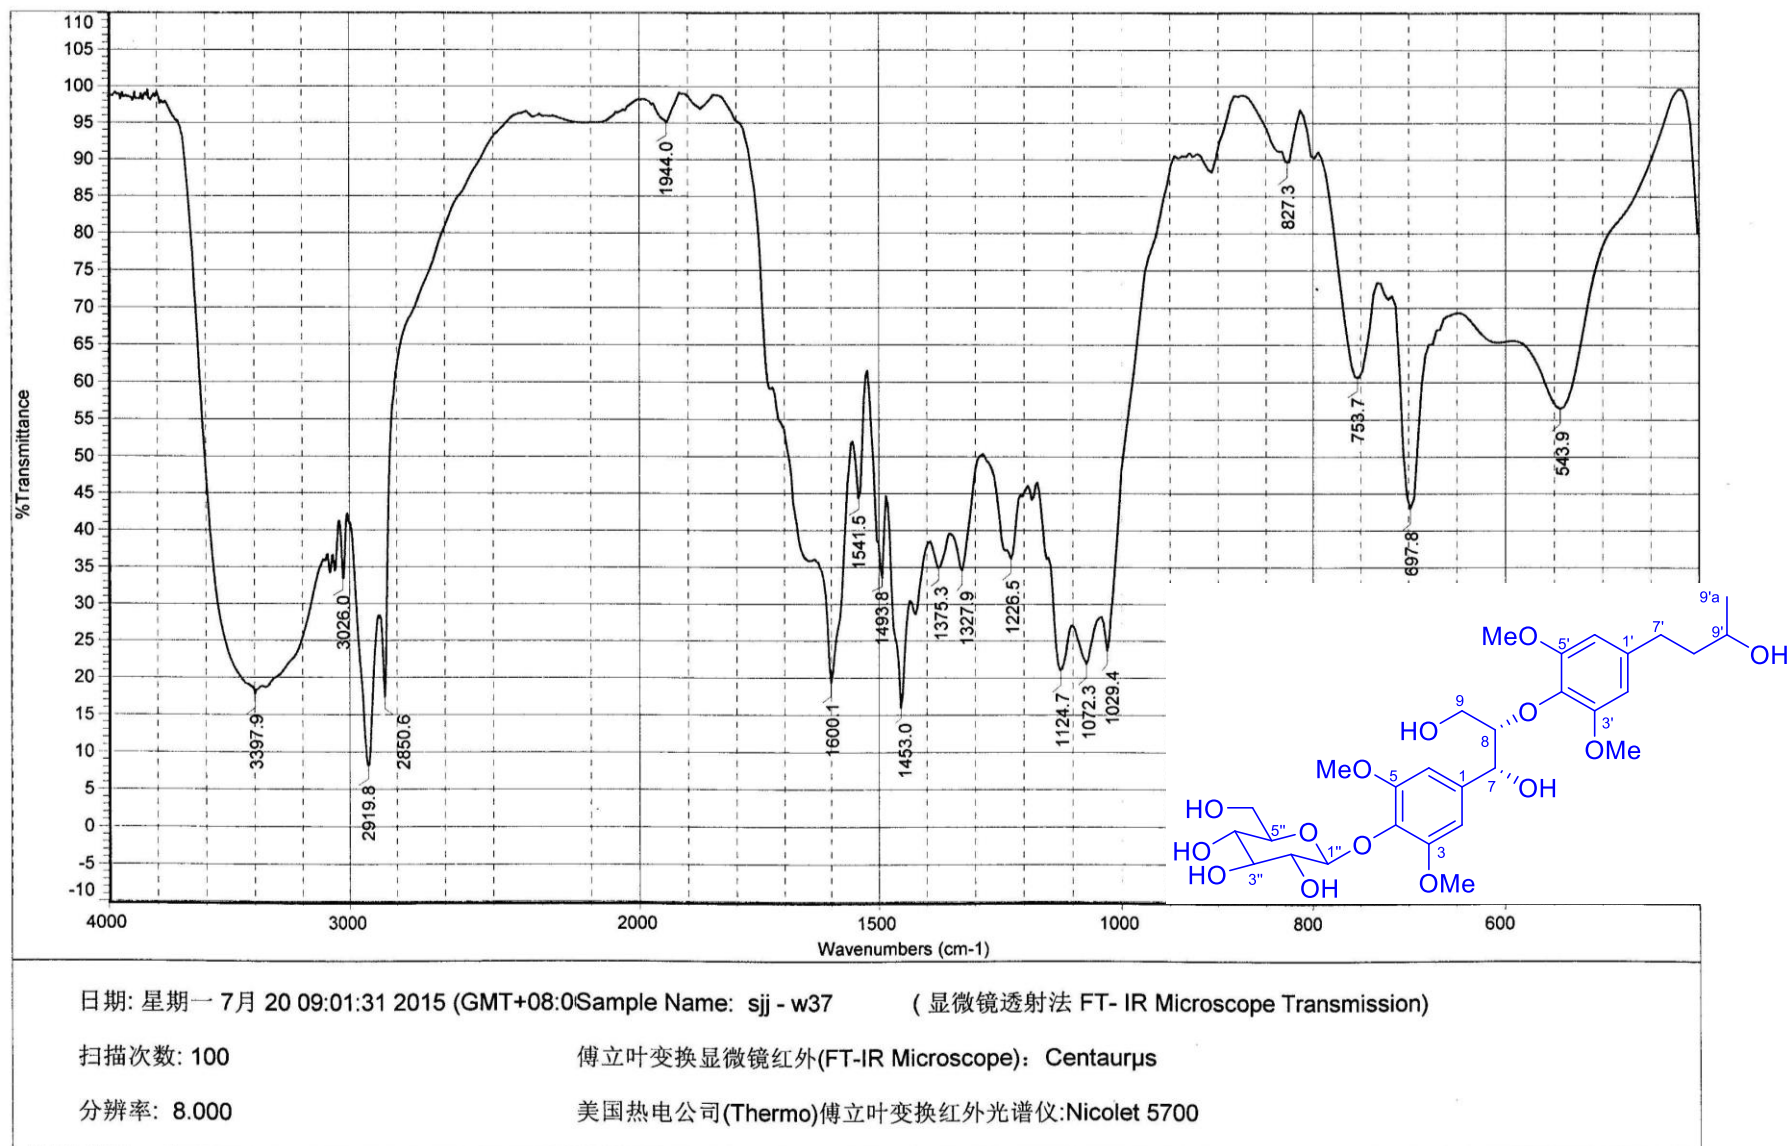

**Figure S44. The IR Spectrum of Compound 4**

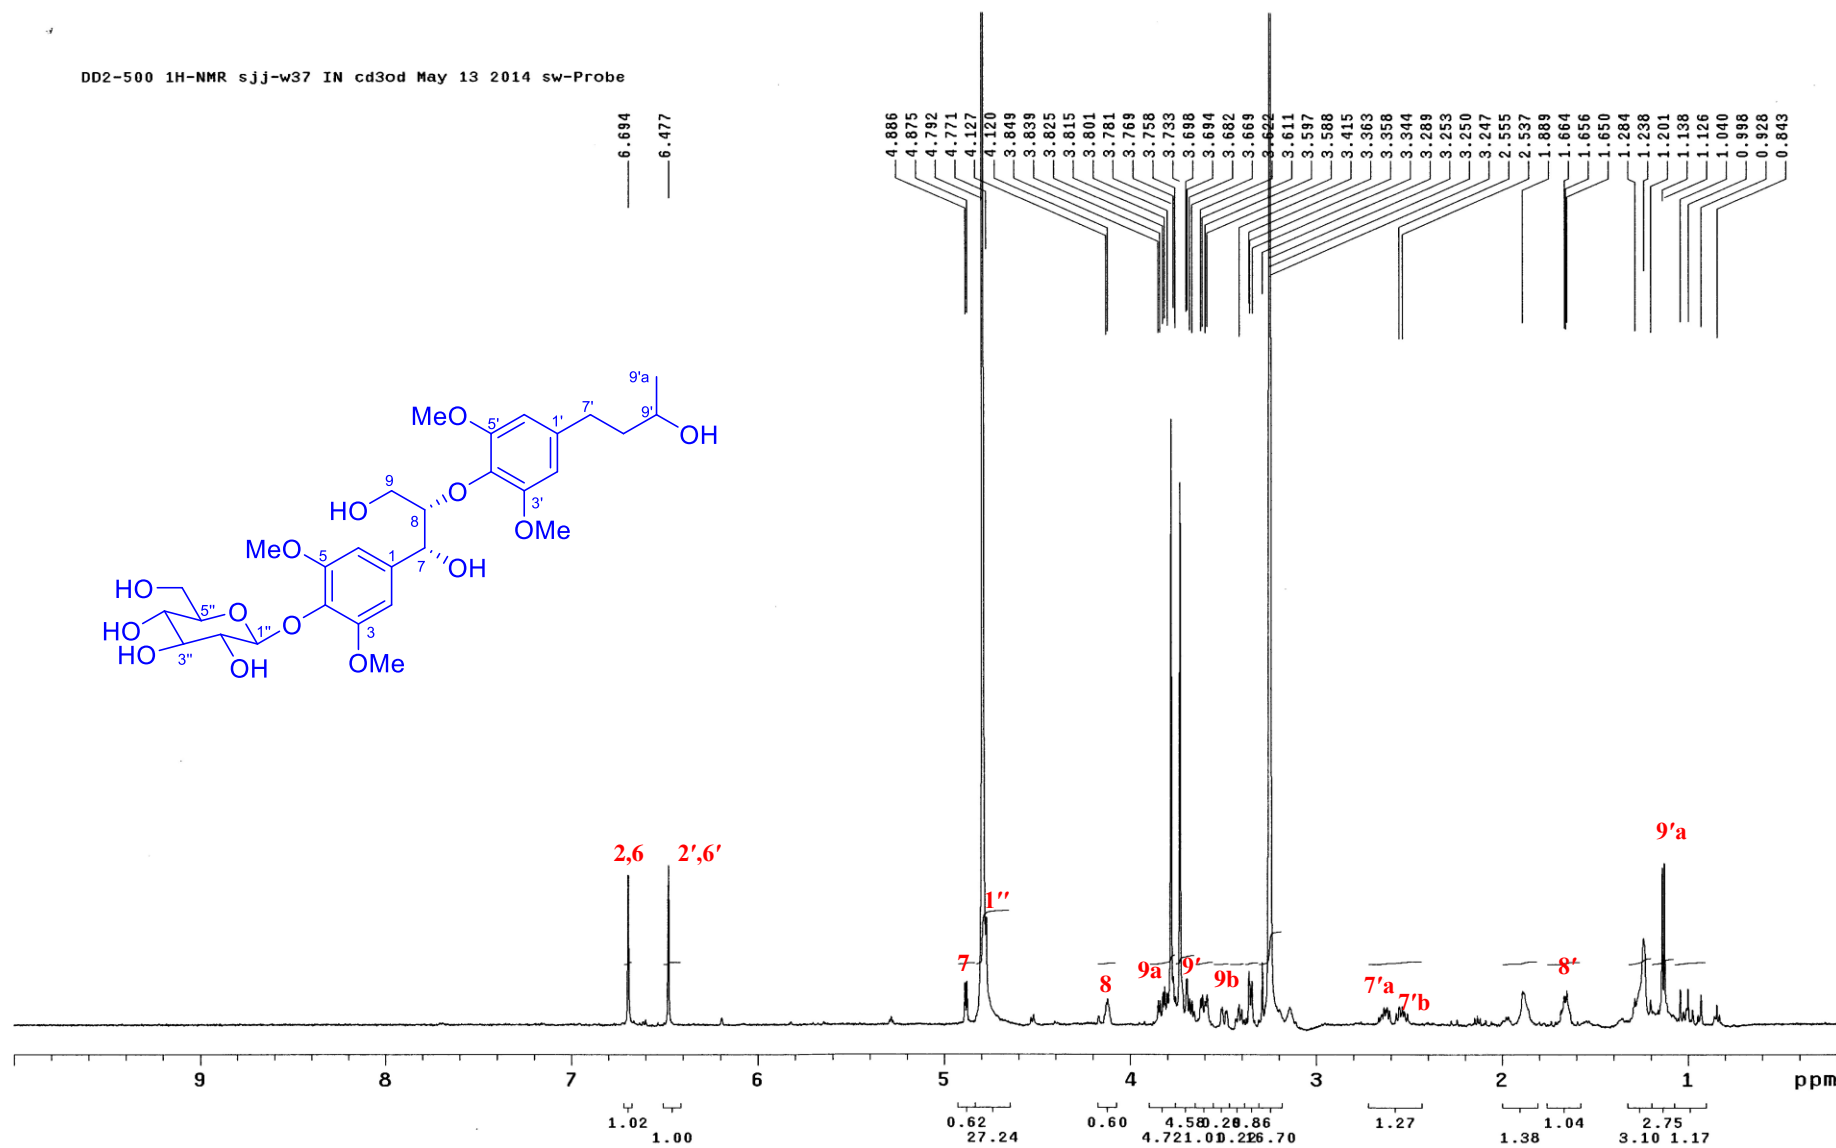

Figure S45. The <sup>1</sup>H NMR Spectrum of Compound 4 in MeOH-*d*<sub>4</sub> (500MHz)

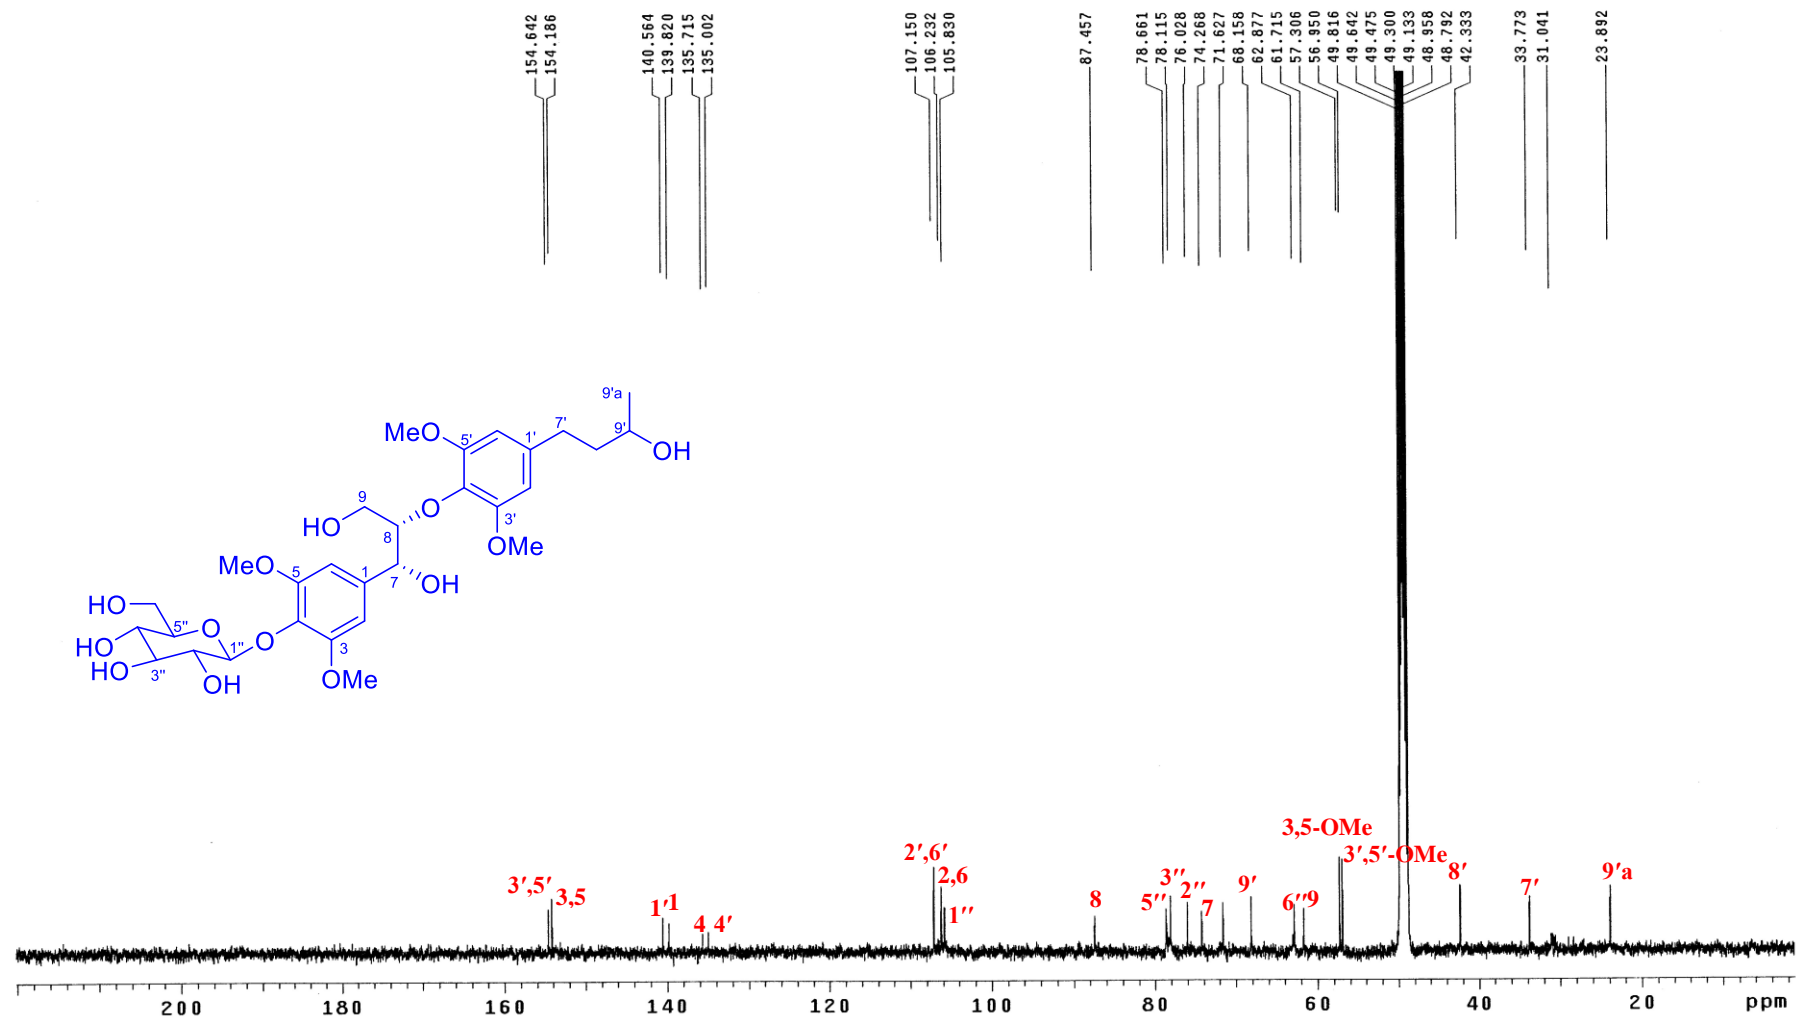

Figure S46. The  $^{13}\text{C}$  NMR Spectrum of Compound 4 in  $\text{MeOH-}d_4$  (125MHz)

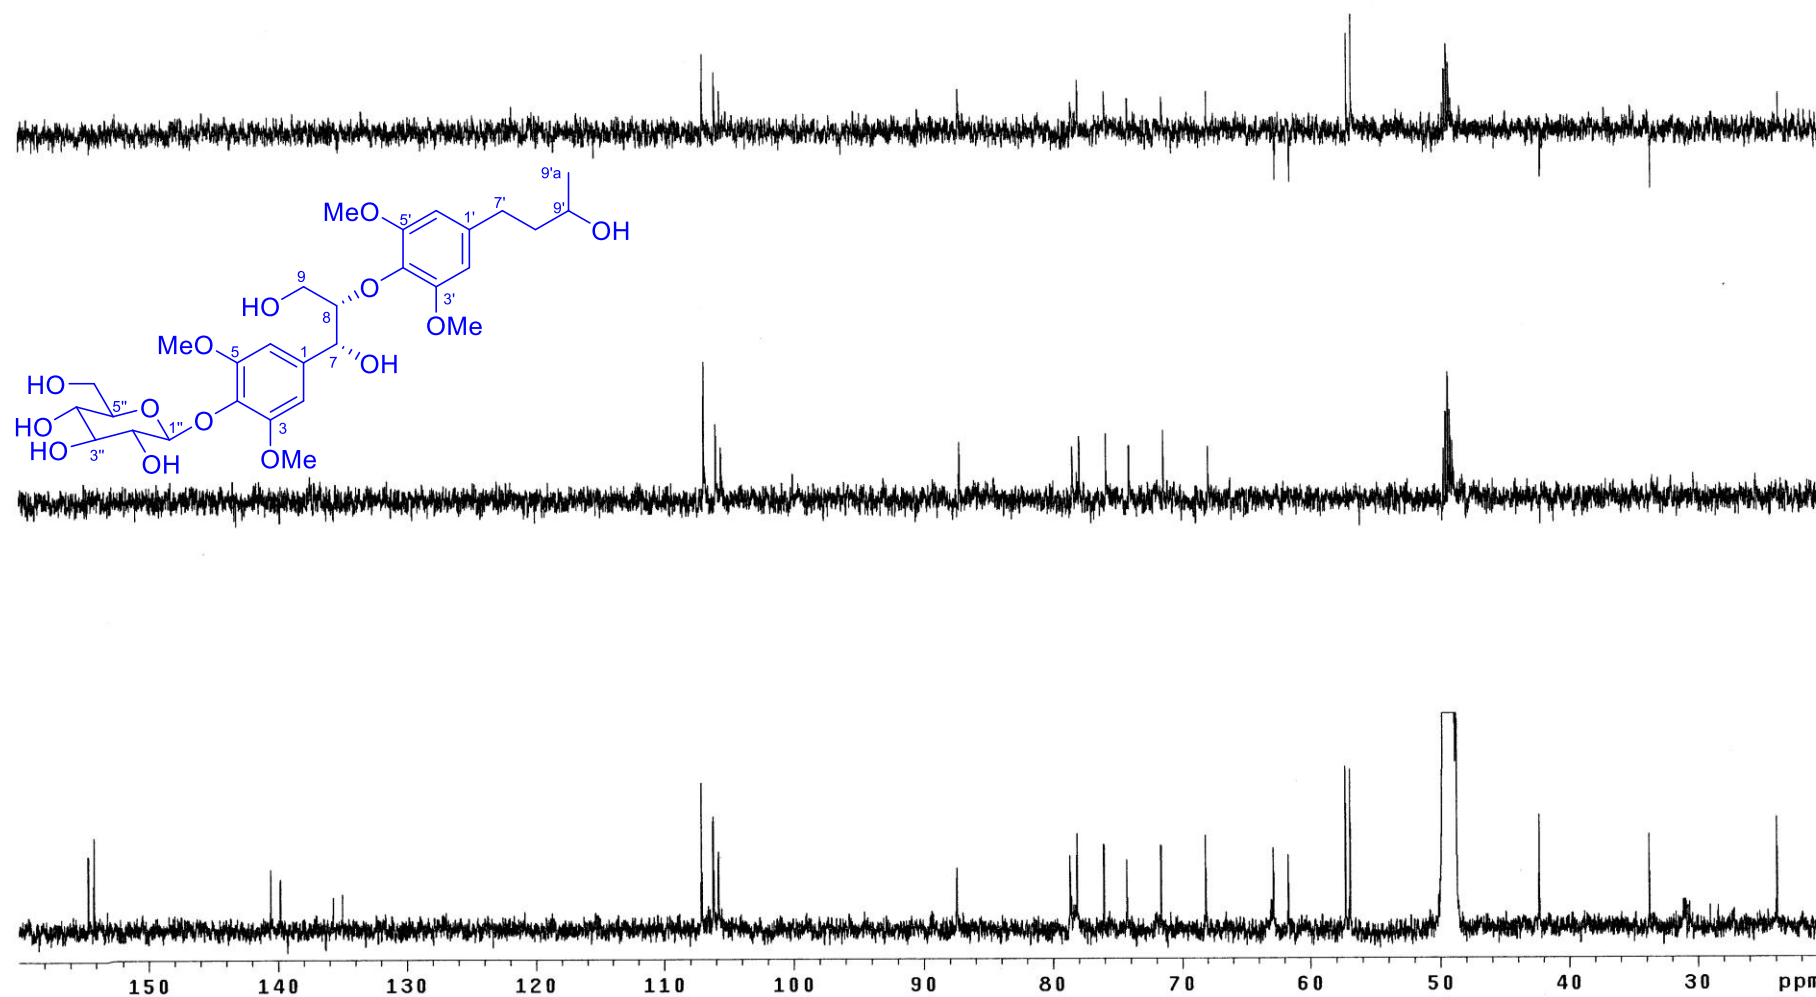

Figure S47. The DEPT NMR Spectrum of Compound 4 in MeOH-*d*<sub>4</sub> (125MHz)

DD2-500 gCOSY sjj-w-37 IN cd3od Oct 31 2014 sw

Temp. 25.0 C / 298.1 K  
Sample #9, Operator: vnmr1

Relax. delay 1.000 sec  
Acq. time 0.150 sec  
Width 5000.0 Hz  
2D Width 5000.0 Hz  
4 repetitions  
200 increments  
OBSERVE H1, 499.7694110 MHz  
DATA PROCESSING  
Sq. sine bell 0.075 sec  
F1 DATA PROCESSING  
Sq. sine bell 0.025 sec  
FT size 2048 x 2048  
Total time 16 min

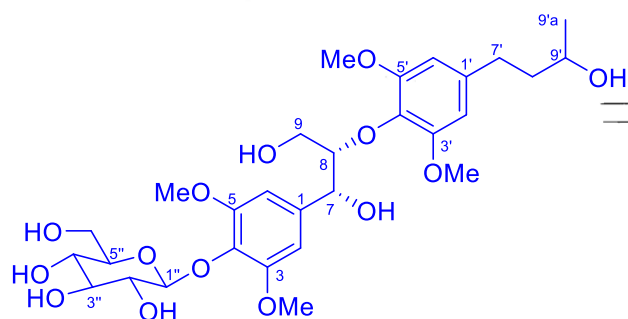

F2  
(ppm)

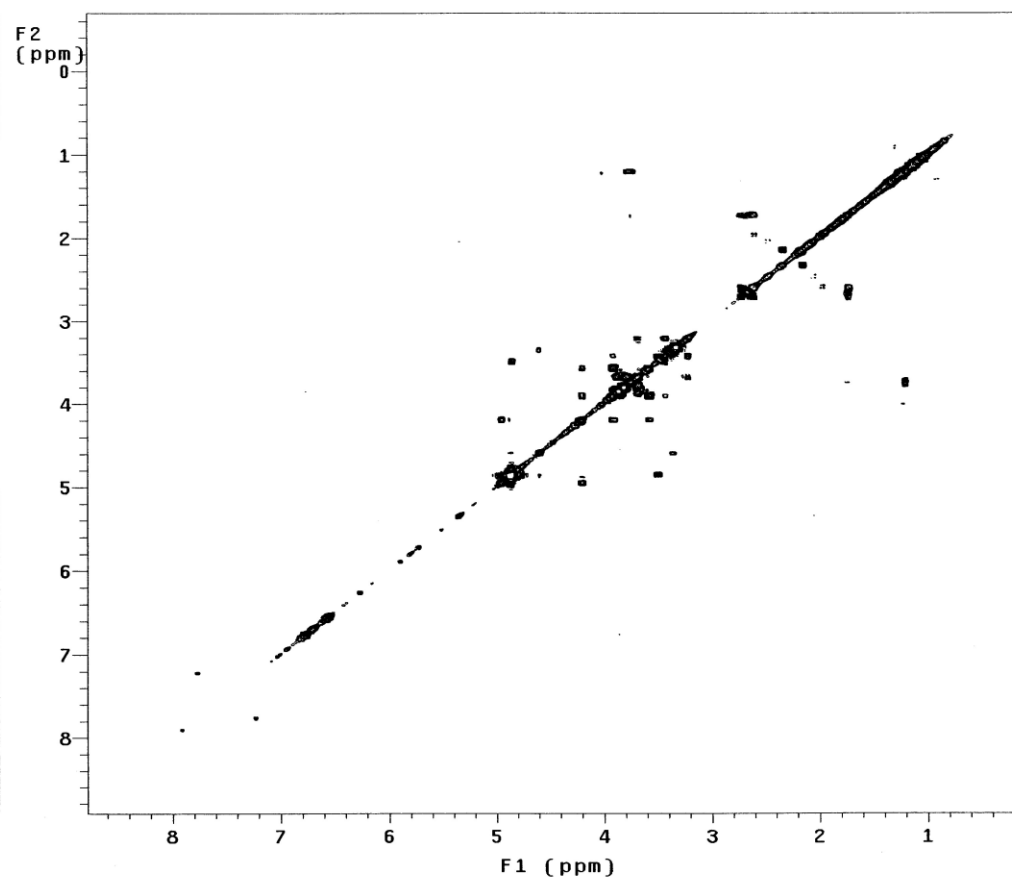

Figure S48. The  $^1\text{H}$ - $^1\text{H}$  COSY Spectrum of Compound 4 in  $\text{MeOH-}d_4$  (500MHz)

DD2-500 gHSQCAD sjj-w-37 IN cd3od Oct 31 2014 sw

Temp. 25.0 C / 298.1 K  
Sample #9, Operator: vnmr1

Relax. delay 1.000 sec  
Acq. time 0.240 sec  
Width 5000.0 Hz  
2D Width 25133.5 Hz  
32 repetitions  
2 x 200 increments  
OBSERVE H1, 499.7694110 MHz  
DECOUPLE C13, 125.6784285 MHz  
Power 40 dB  
on during acquisition  
off during delay  
W40\_sw modulated  
DATA PROCESSING  
Gauss apodization 0.069 sec  
F1 DATA PROCESSING  
Gauss apodization 0.007 sec  
FT size 4096 x 2048  
Total time 4 hr, 16 min

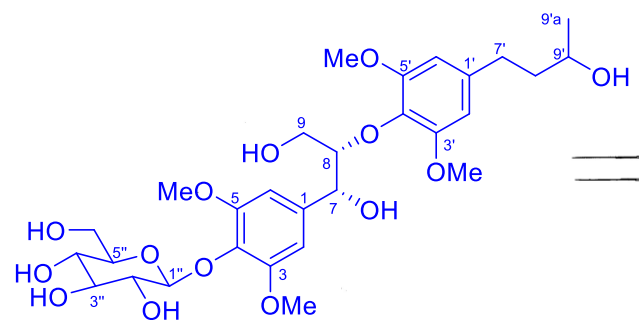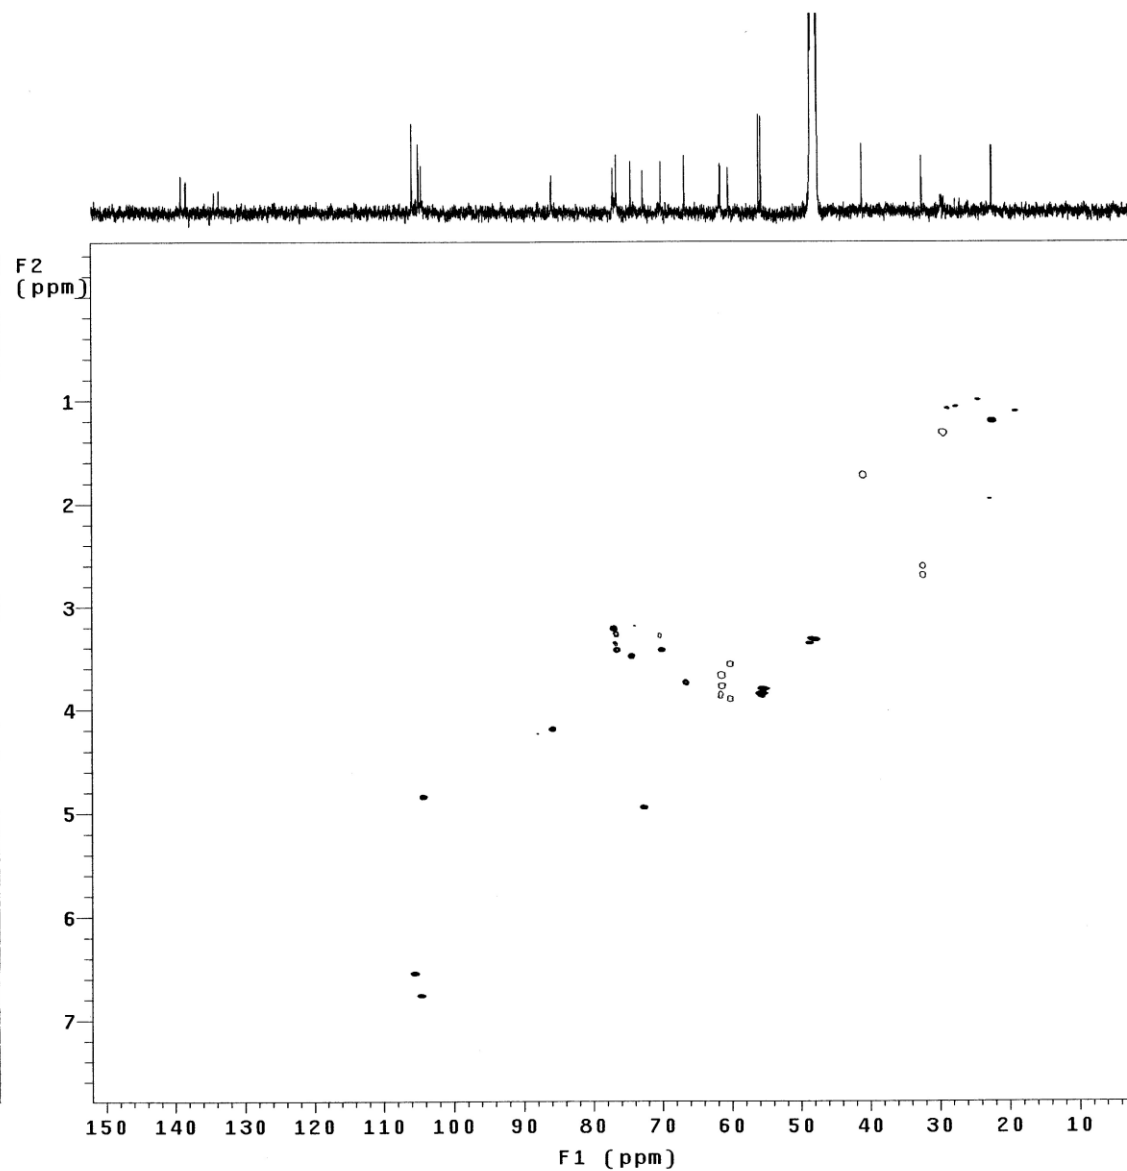

Figure S49. The HSQC Spectrum of Compound 4 in MeOH- $d_4$  (500MHz)

DD2-500 gHMBCAD sjj-w-37 IN cd3od Nov 1 2014 sw

Temp. 25.0 C / 298.1 K  
Sample #9, Operator: vnmr1

Relax. delay 1.000 sec  
Acq. time 0.240 sec  
Width 5000.0 Hz  
2D Width 30154.5 Hz  
64 repetitions  
2 x 200 increments  
OBSERVE H1, 499.7694110 MHz  
DATA PROCESSING  
Sq. sine bell 0.075 sec  
F1 DATA PROCESSING  
Gauss apodization 0.006 sec  
FT size 4096 x 2048  
Total time 8 hr, 47 min

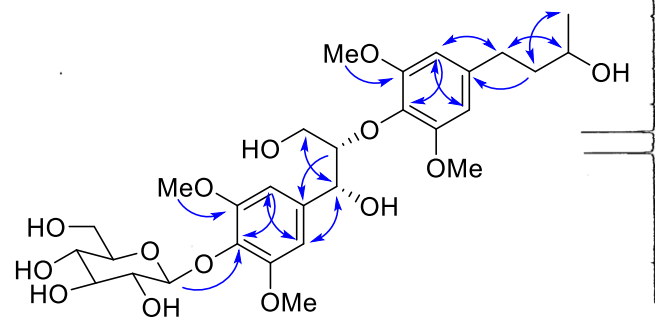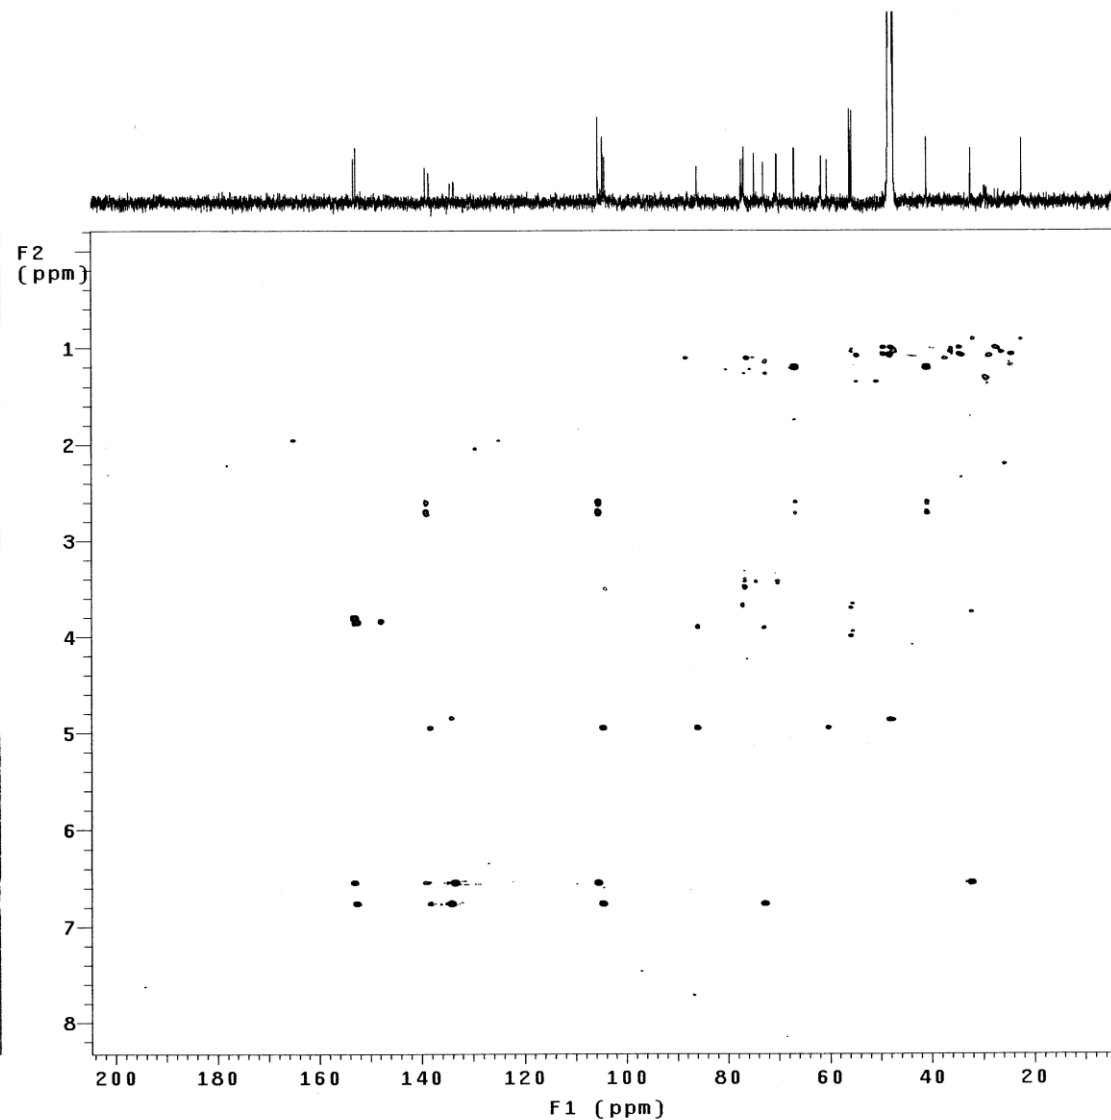

**Figure S50. The HMBC Spectrum of Compound 4 in MeOH-*d*<sub>4</sub> (500MHz)**

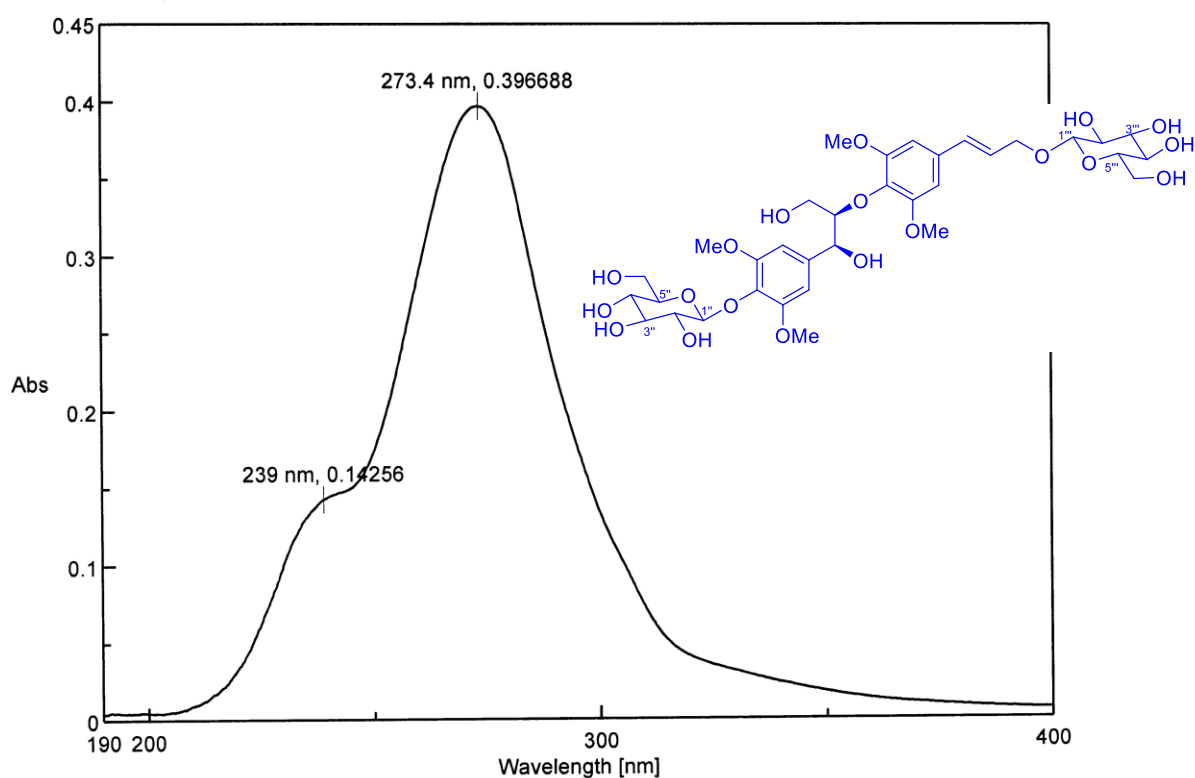

[Comment]  
 Sample Name DBT  
 Comment 0.02  
 User  
 Division UV  
 Company 324  
 [Measurement Information]  
 Instrument Name V-650  
 Model Name V-650  
 Serial No. A034461150

Accessory PSC-718  
 Accessory S/N A001761114  
 Position 1  
 Cell Length 10 mm  
 Temperature 20.01 C  
 Control Sensor Holder  
 Monitor Sensor Holder  
 Start Mode Start immediately

Photometric Mode Abs  
 Measurement range 400 - 190 nm  
 Data pitch 0.2 nm  
 Band width(UV/Vis) 2.0 nm  
 Response Medium  
 Scanning speed 200 nm/min  
 Source Change 340 nm  
 Light Source D2/WI  
 Filter Exchange Step  
 Correction Baseline

[Data Information]  
 Creation Date 2015-6-30 19:24  
 Data array type Linear data array  
 Horizontal Wavelength [nm]  
 Vertical Abs  
 Start 400 nm  
 End 190 nm  
 Data pitch 0.2 nm  
 Data points 1051

**Figure S51. The UV Spectrum of Compound 5 in MeOH**

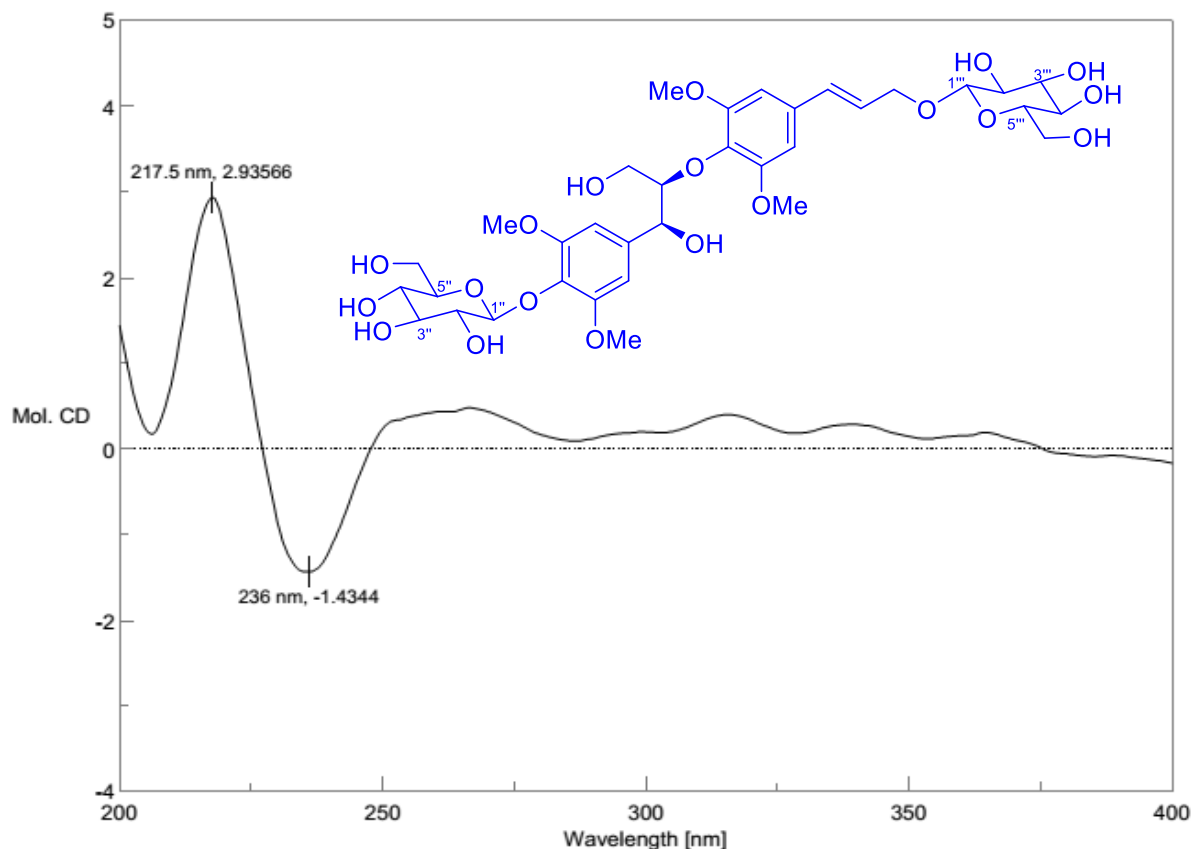

[Comments]  
 Sample name      sjj-w80  
 Comment  
 User  
 Division  
 Company          dell

[Measurement Information]  
 Instrument Name    J-815  
 Model Name        J-815  
 Serial No.         A024461168

Accessory          Standard  
 Accessory S/N      A024461168  
 Cell Length        1 mm

Photometric Mode   CD, HT, Abs  
 Measure Range      400 - 200 nm  
 Data pitch          0.5 nm  
 Sensitivity          Standard  
 D.I.T.                1 sec  
 Band width          2.00 nm  
 Start Mode          Immediately  
 Scanning Speed     100 nm/min  
 Baseline Correction Baseline  
 Shutter Control     Auto  
 PMT Voltage        Auto  
 Accumulations      2  
 Solvent              ME OH  
 Concentration       0.086 (w/v)%

[Detailed Information]  
 Creation date       2015-7-1 11:23

Data array type     Linear data array \* 3  
 Horizontal axis      Wavelength [nm]  
 Vertical axis(1)     Mol. CD  
 Vertical axis(2)     HT [V]  
 Vertical axis(3)     Abs  
 Start                  400 nm  
 End                    200 nm  
 Data interval        0.5 nm  
 Data points          401

**Figure S52. The CD Spectrum of Compound 5 in MeOH**

# Compound Mass Spectrum Report - MS

**Analysis Name:** 20150416-14.d **Instrument:** LC-MSD-Trap-SL **Print Date:** 2015-6-8 12:18:04  
**Method:** linsheng.m **Operator:** Operator **Acq. Date:** 2015-4-16 22:52:55  
**Sample Name:** SJJ-w80  
**Analysis Info:**

## Acquisition Parameter:

|                 |            |                       |             |                |           |
|-----------------|------------|-----------------------|-------------|----------------|-----------|
| Mass Range Mode | Std/Normal | Trap Drive            | 82.8        | Scan Begin     | 100 m/z   |
| Ion Polarity    | Positive   | Skim 1                | -40.0 Volt  | Scan End       | 1000 m/z  |
| Ion Source Type | ESI        | Skim 2                | 5.0 Volt    | Averages       | 7 Spectra |
| Dry Temp (Set)  | 330 ℃      | Octopole RF Amplitude | 200.0 Vpp   | Max. Accu Time | 200000 釐  |
| Nebulizer (Set) | 15.00 psi  | Capillary Exit        | -151.0 Volt | ICC Target     | 30000     |
| Dry Gas (Set)   | 6.00 l/min |                       |             | Charge Control | on        |

## +MS, 0.3min #8

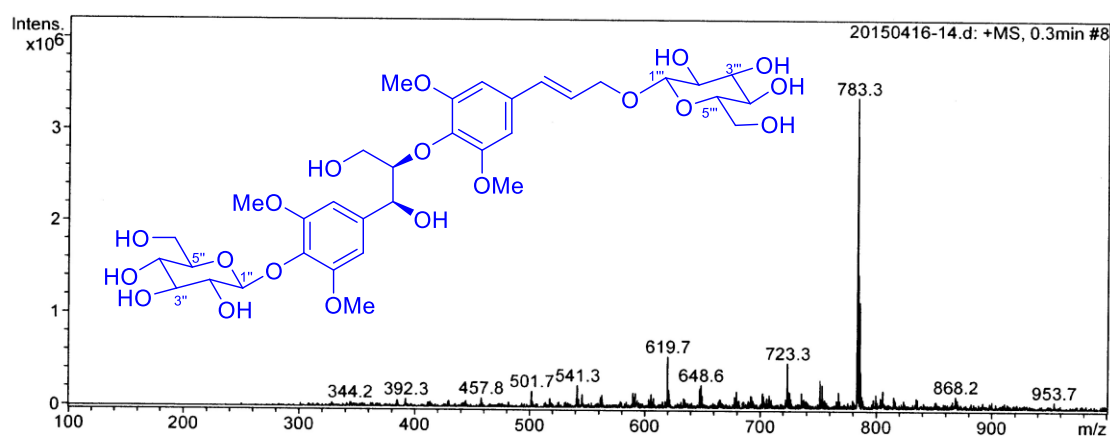

## -MS, 0.3min #7

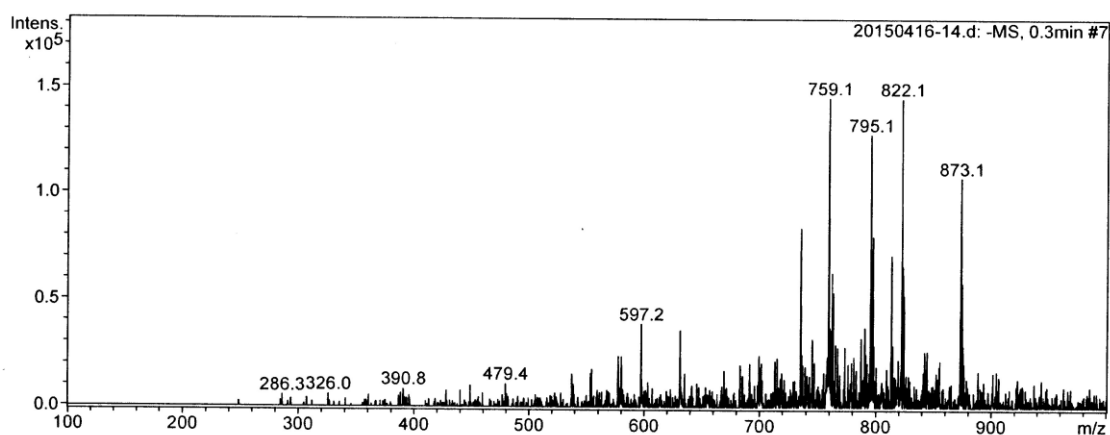

**Figure S53. The ESIMS Spectrum of Compound 5**

日期:2015-06-17

仪器:API-TOFMS 10000 广州禾信分析仪器有限公司

时间:从0.2900到0.5060

用户单位名称:中国医学科学院药物研究所

样品名称:sjj-w80

离子模式:Positive

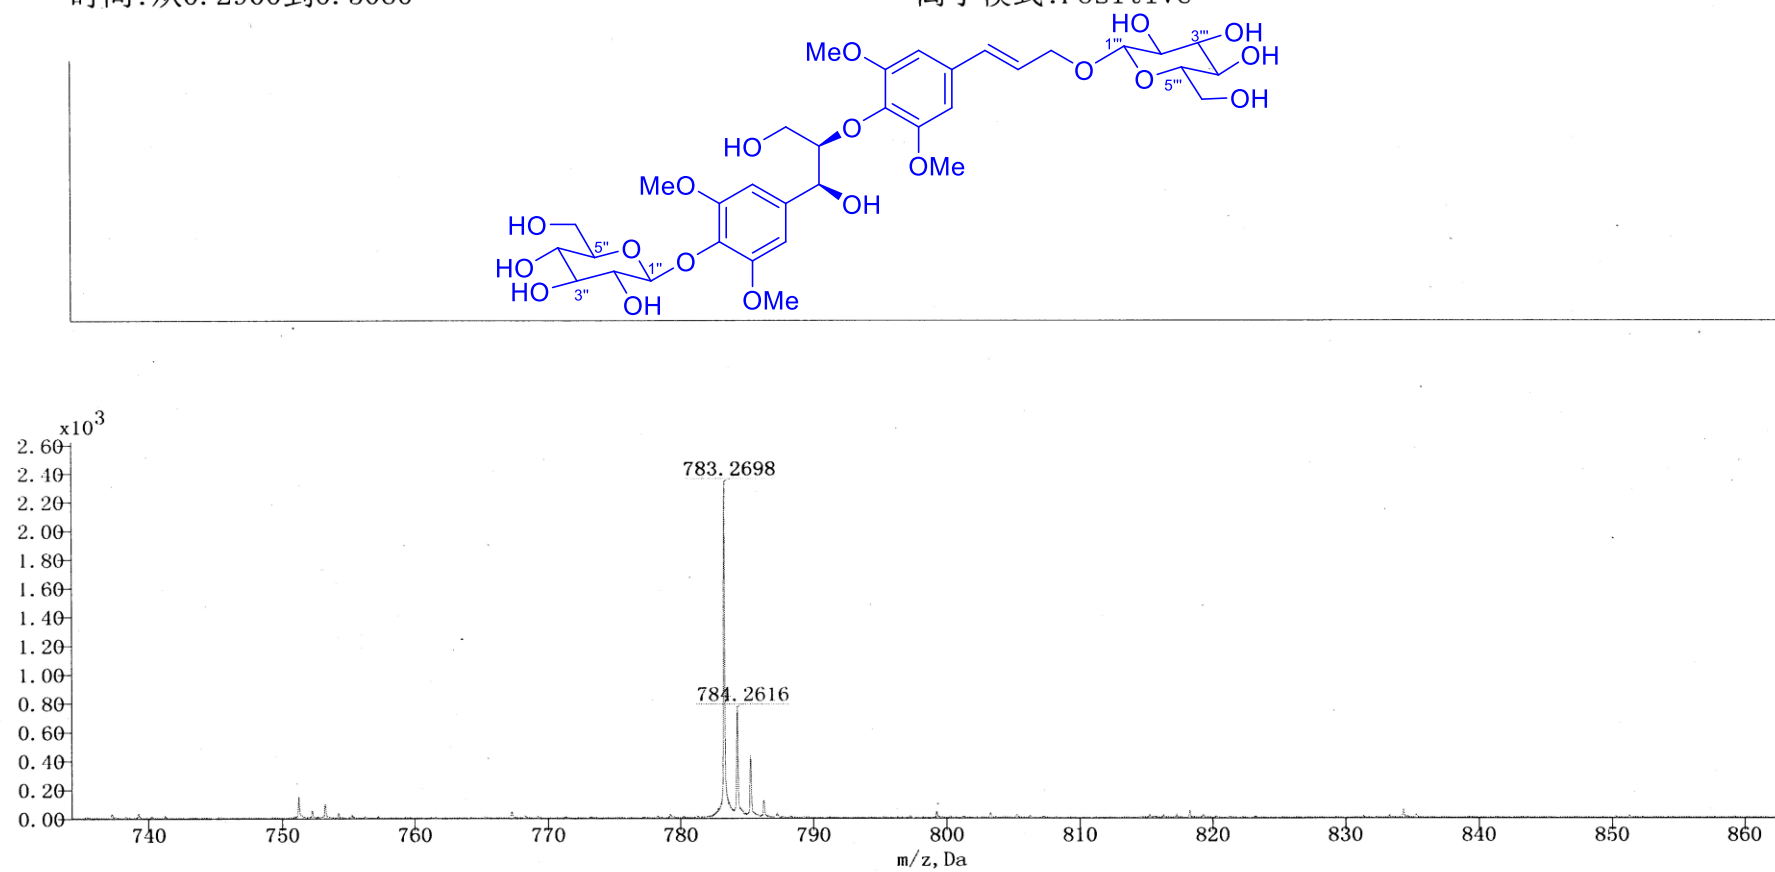

**Figure S54. The HRESIMS Spectrum of Compound 5**

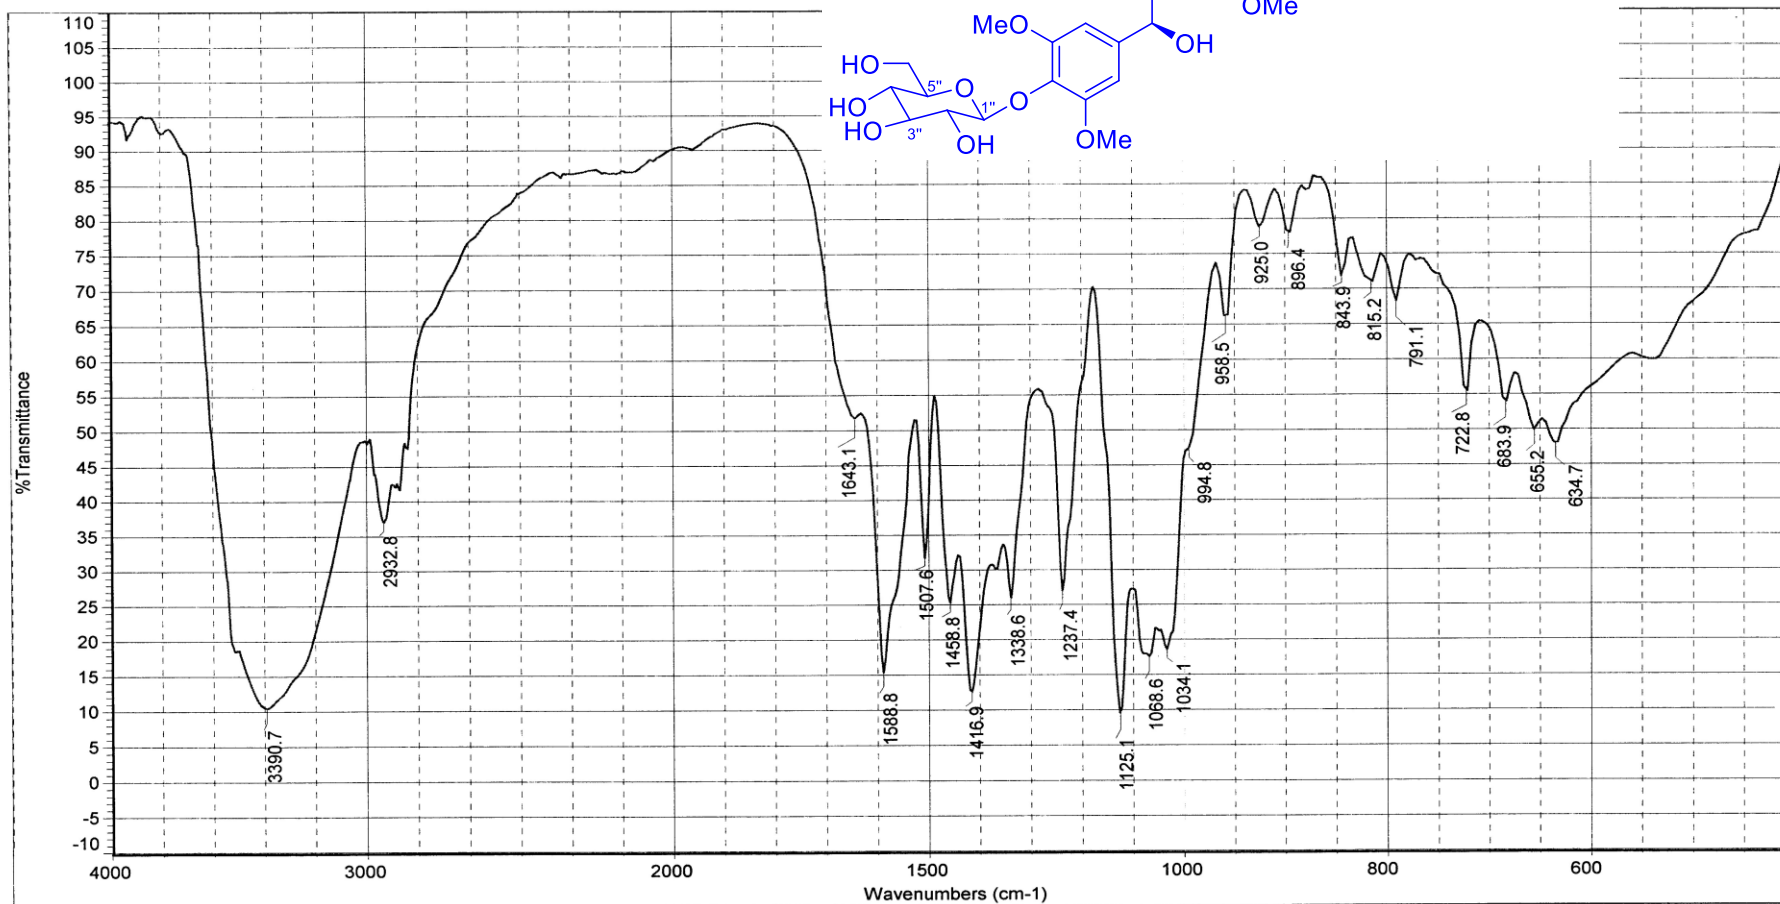

日期: 星期三 7月 01 10:19:42 2015 (GMT+08:00) Sample Name: sjj - w80

(显微镜透射法 FT- IR Microscope Transmission)

扫描次数: 100

傅里叶变换显微镜红外(FT-IR Microscope): Centaurus

分辨率: 8.000

美国热电公司(Thermo)傅里叶变换红外光谱仪:Nicolet 5700

**Figure S55. The IR Spectrum of Compound 5**

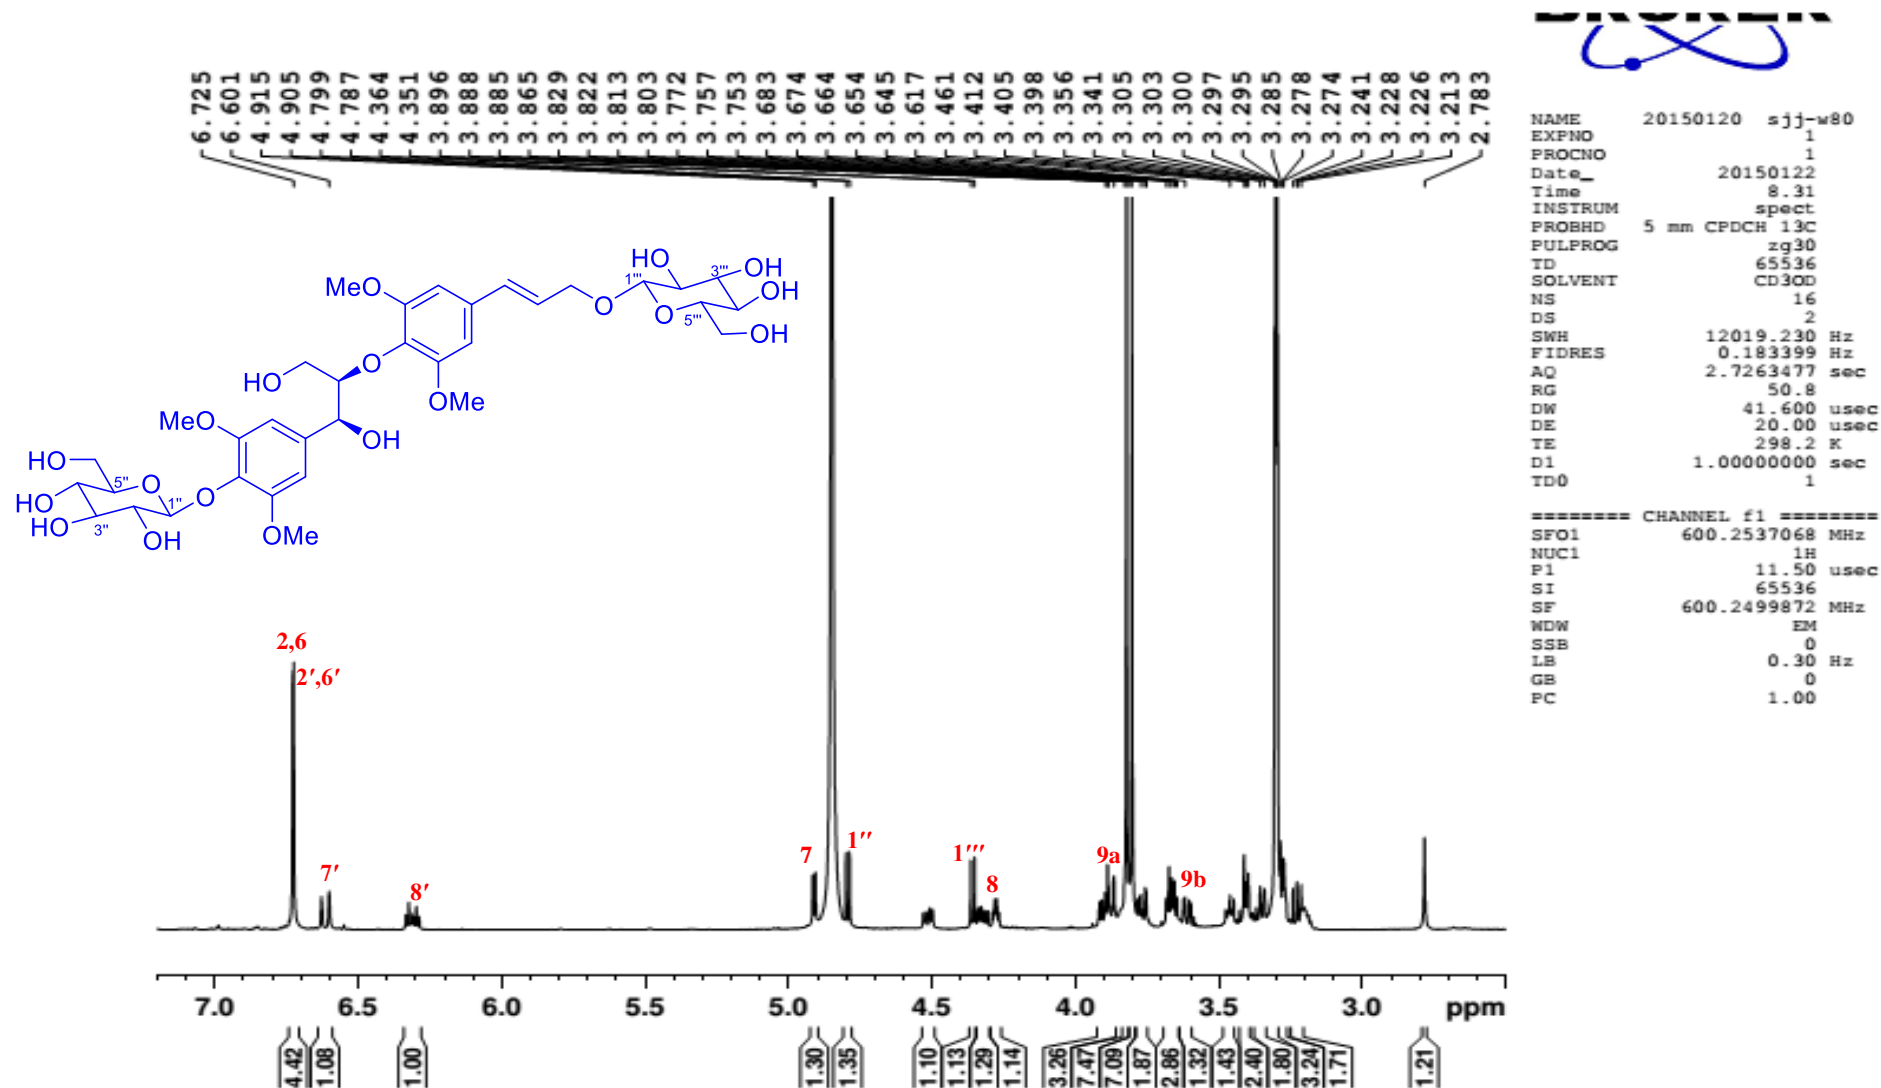

Figure S56. The  $^1\text{H}$  NMR Spectrum of Compound 5 in  $\text{MeOH-}d_4$  (600MHz)

Bruker AVIIIHD 600 20150112 sjj-w80  
 C13 CD3OD D:\ DATA2015 16

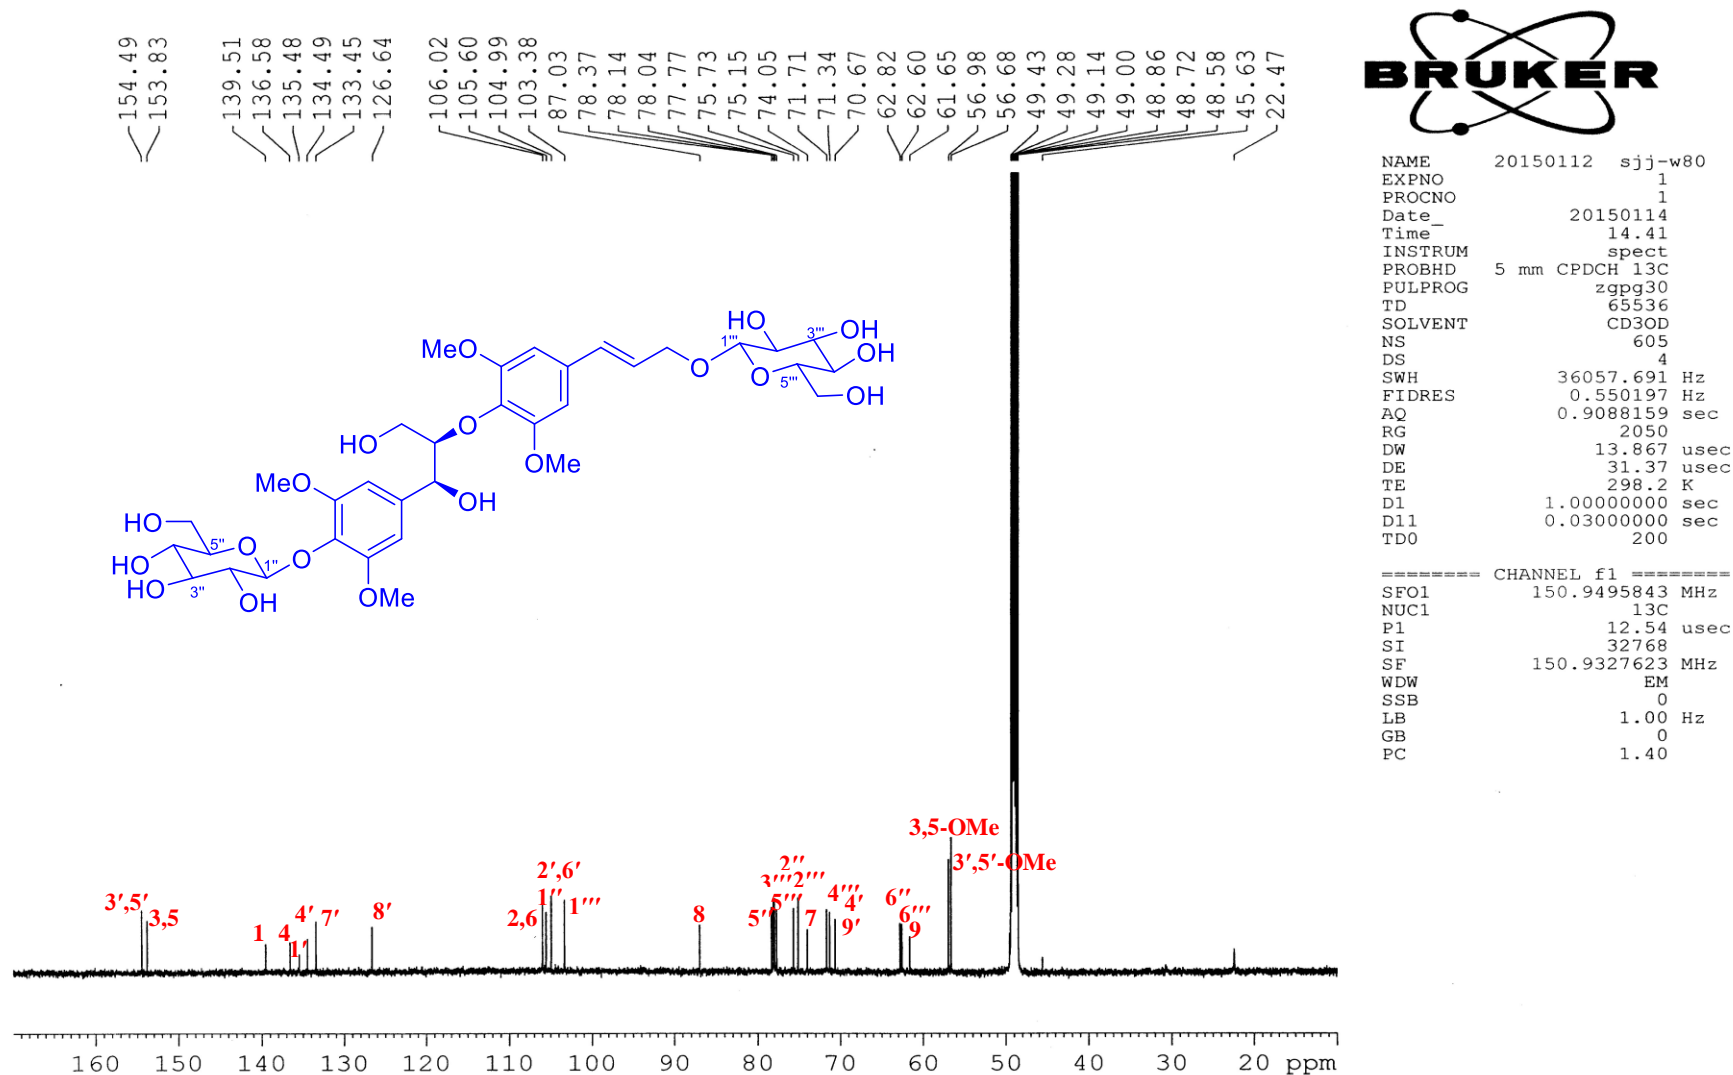

Figure S57. The  $^{13}\text{C}$  NMR Spectrum of Compound 5 in  $\text{MeOH-}d_4$  (150MHz)

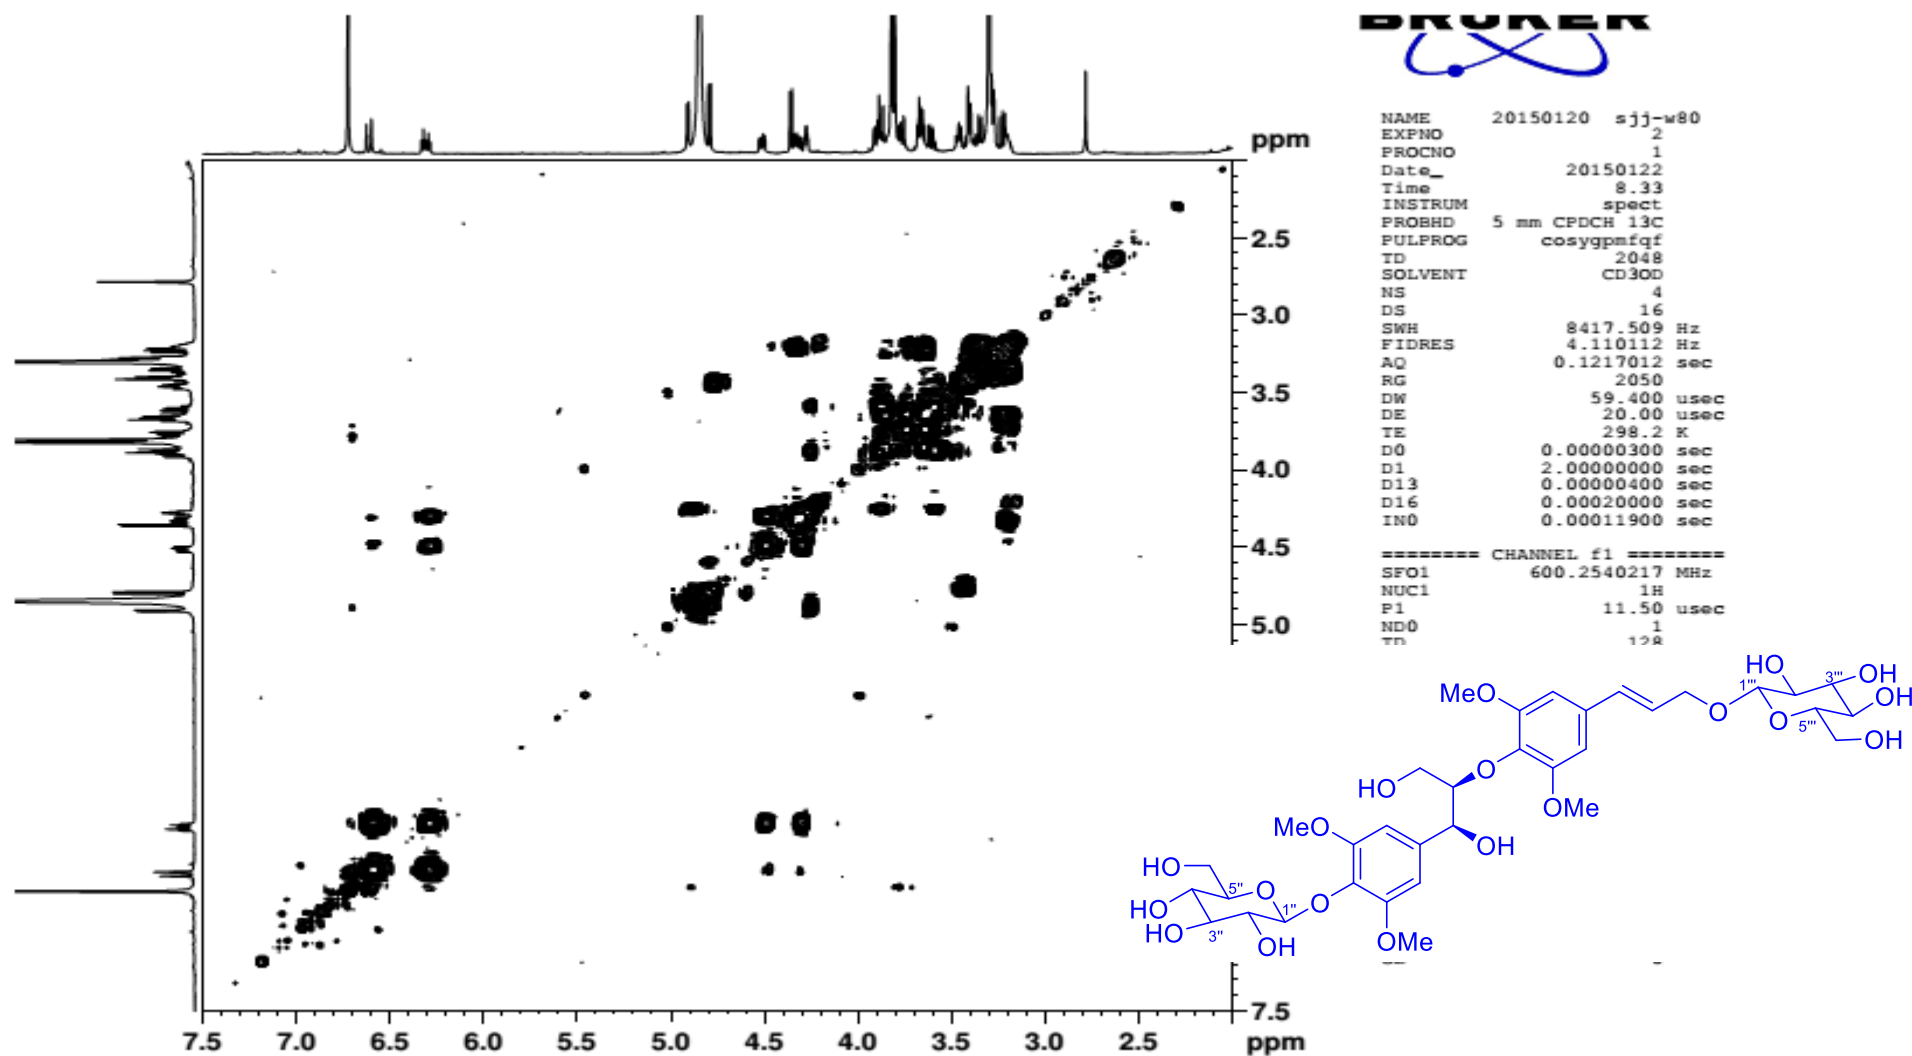

Figure S58. The  $^1\text{H}$ - $^1\text{H}$  COSY Spectrum of Compound 5 in  $\text{MeOH-}d_4$  (600MHz)

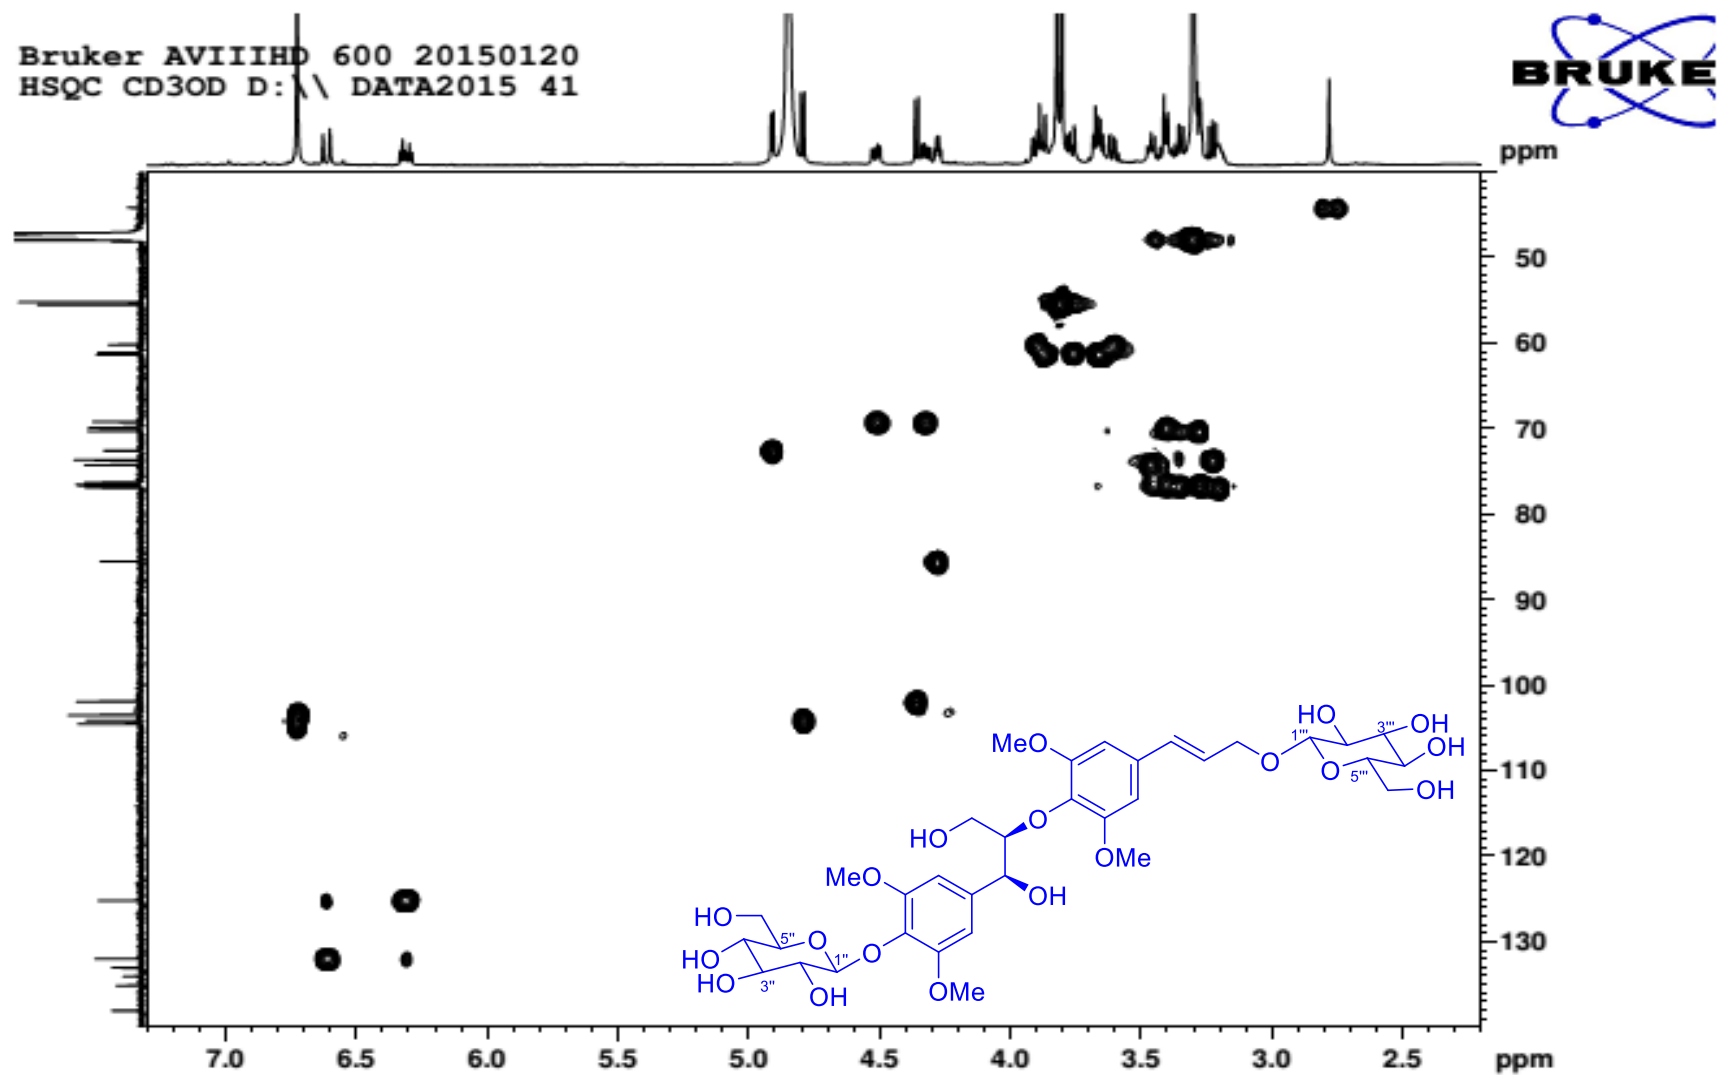

Figure S59. The HSQC Spectrum of Compound 5 in MeOH- $d_4$  (600MHz)

Bruker AVIIIHD 600 20150120  
HMBC CD3OD D: \\ DATA2015 41

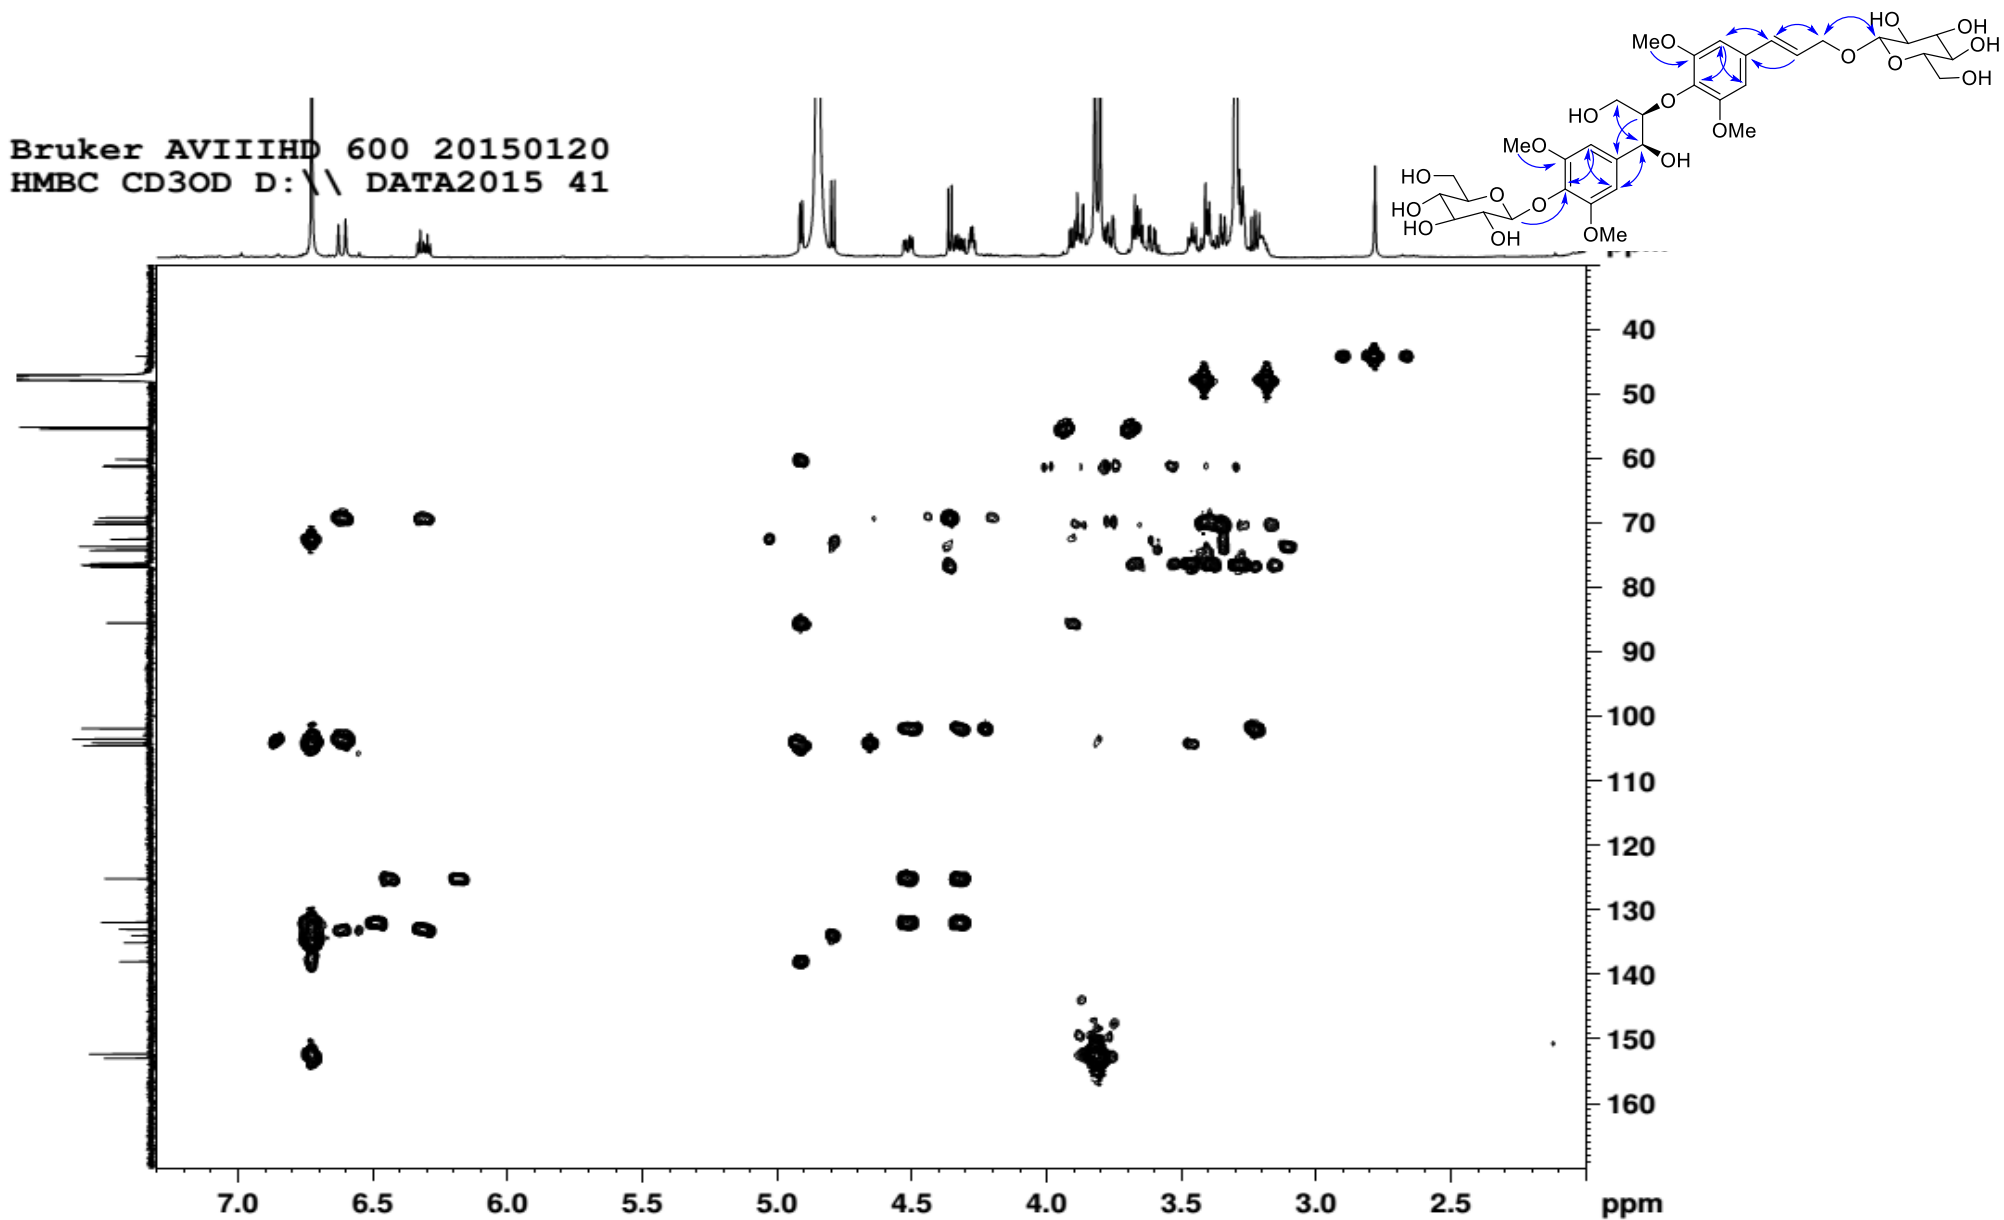

Figure S60. The HMBC Spectrum of Compound 5 in MeOH-*d*<sub>4</sub> (600MHz)

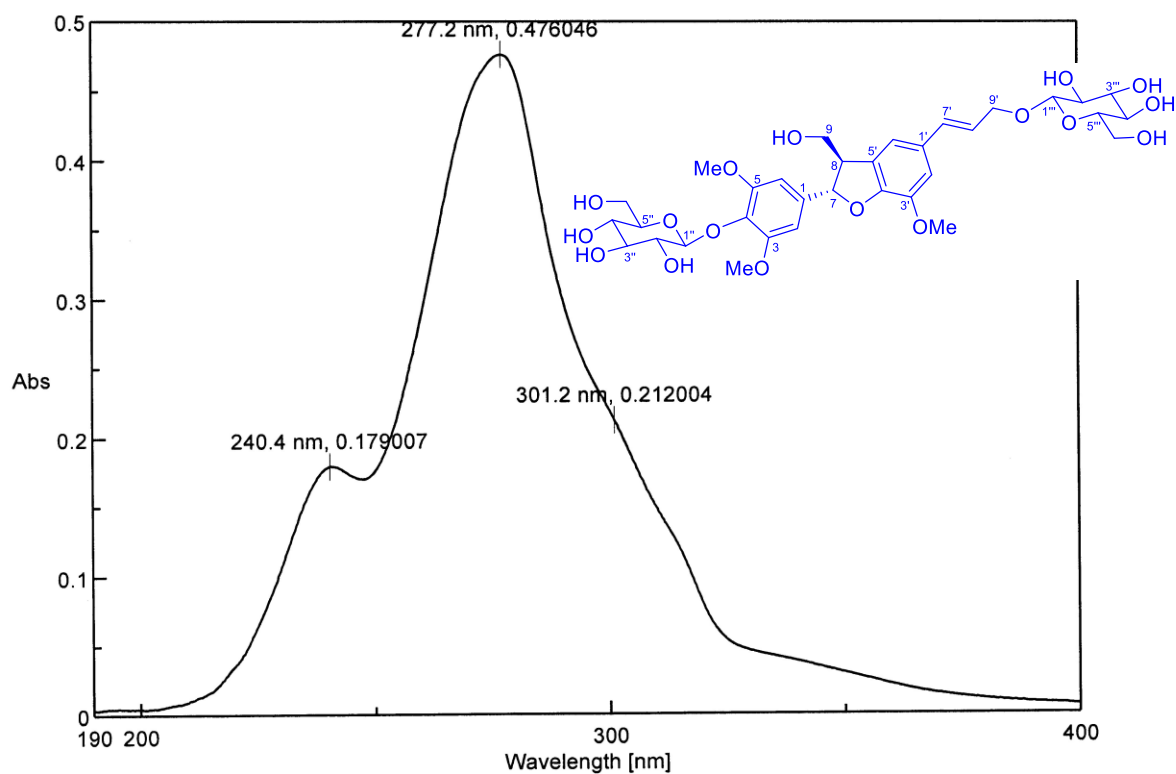

[Comment]  
 Sample Name DBT  
 Comment 0.02  
 User  
 Division UV  
 Company 324  
 [Measurement Information]  
 Instrument Name V-650  
 Model Name V-650  
 Serial No. A034461150

Accessory PSC-718  
 Accessory S/N A001761114  
 Position 1  
 Cell Length 10 mm  
 Temperature 19.97 C  
 Control Sensor Holder  
 Monitor Sensor Holder  
 Start Mode Start immediately

Photometric Mode Abs  
 Measurement range 400 - 190 nm  
 Data pitch 0.2 nm  
 Band width(UV/Vis) 2.0 nm  
 Response Medium  
 Scanning speed 200 nm/min  
 Source Change 340 nm  
 Light Source D2/WI  
 Filter Exchange Step  
 Correction Baseline

[Data Information]  
 Creation Date 2015-6-30 19:02  
 Data array type Linear data array  
 Horizontal Wavelength [nm]  
 Vertical Abs  
 Start 400 nm  
 End 190 nm  
 Data pitch 0.2 nm  
 Data points 1051

SJJ-W78

**Figure S61. The UV Spectrum of Compound 6 in MeOH**

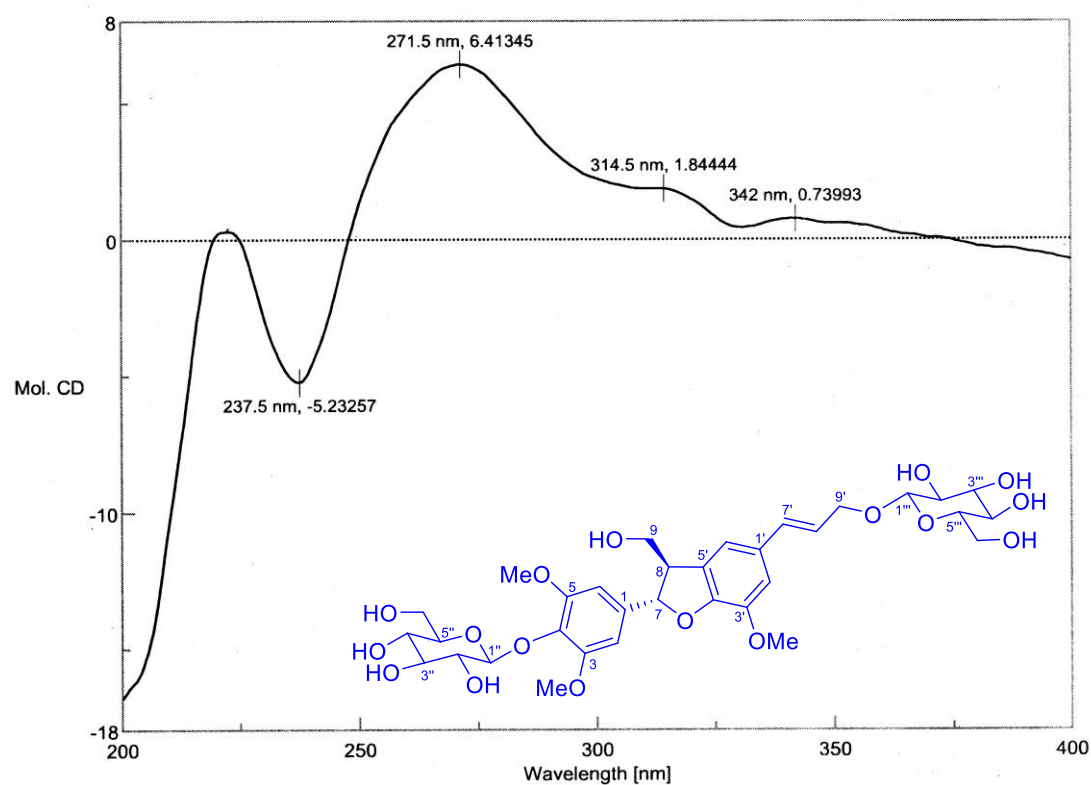

[Comments]  
Sample name sjj-w78  
Comment  
User  
Division  
Company dell

[Measurement Information]  
Instrument Name J-815  
Model Name J-815  
Serial No. A024461168

Accessory Standard  
Accessory S/N A024461168  
Cell Length 1 mm

Photometric Mode CD, HT, Abs  
Measure Range 400 - 200 nm  
Data pitch 0.5 nm  
Sensitivity Standard  
D.I.T. 1 sec  
Band width 2.00 nm  
Start Mode Immediately  
Scanning Speed 100 nm/min  
Baseline Correction Baseline  
Shutter Control Auto  
PMT Voltage Auto  
Accumulations 2  
Solvent MEOH  
Concentration 0.028 (w/v)%

[Detailed Information]  
Creation date 2015-7-1 10:56

Data array type Linear data array \* 3  
Horizontal axis Wavelength [nm]  
Vertical axis(1) Mol. CD  
Vertical axis(2) HT [V]  
Vertical axis(3) Abs  
Start 400 nm  
End 200 nm  
Data interval 0.5 nm  
Data points 401

**Figure S62. The CD Spectrum of Compound 6 in MeOH**

## Compound Mass Spectrum Report - MS

**Analysis Name:** 20150416-1.d **Instrument:** LC-MSD-Trap-SL **Print Date:** 2015-6-5 15:46:08  
**Method:** standby.m **Operator:** Operator **Acq. Date:** 2015-4-16 21:33:45  
**Sample Name:** SJJ-w78  
**Analysis Info:**

### Acquisition Parameter:

|                 |            |                       |             |                |           |
|-----------------|------------|-----------------------|-------------|----------------|-----------|
| Mass Range Mode | Std/Normal | Trap Drive            | 75.3        | Scan Begin     | 100 m/z   |
| Ion Polarity    | Positive   | Skim 1                | -40.0 Volt  | Scan End       | 1000 m/z  |
| Ion Source Type | ESI        | Skim 2                | 5.0 Volt    | Averages       | 5 Spectra |
| Dry Temp (Set)  | 330 度      | Octopole RF Amplitude | 200.0 Vpp   | Max. Accu Time | 200000 秒  |
| Nebulizer (Set) | 15.00 psi  | Capillary Exit        | -143.5 Volt | ICC Target     | 30000     |
| Dry Gas (Set)   | 6.00 l/min |                       |             | Charge Control | on        |

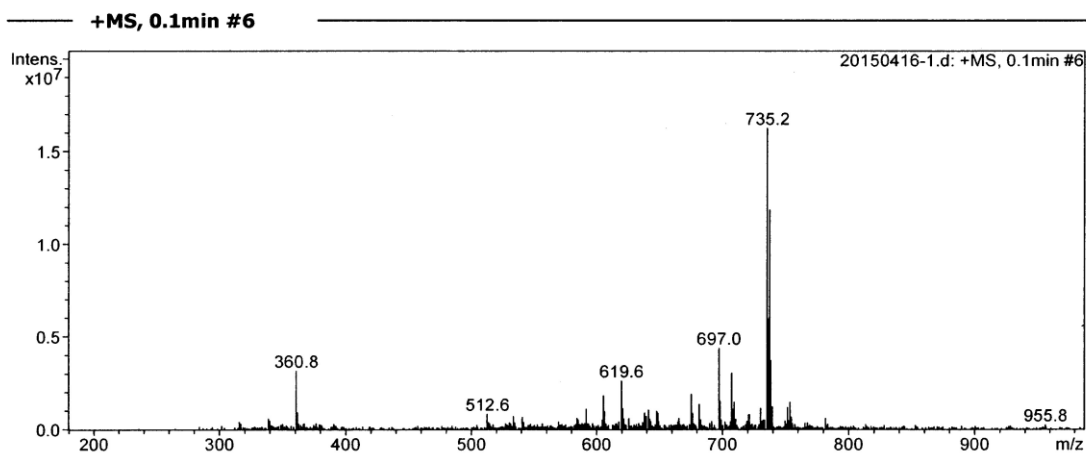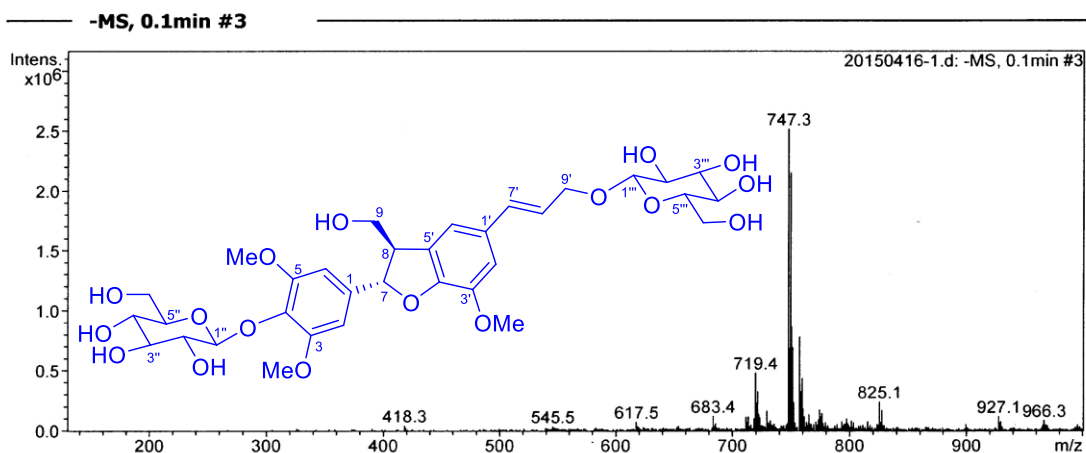

**Figure S63. The ESIMS Spectrum of Compound 6**

日期:2015-06-17  
仪器:API-TOFMS 10000 广州禾信分析仪器有限公司  
时间:从0.2900到0.5060

用户单位名称:中国医学科学院药物研究所  
样品名称:sjj-w78  
离子模式:Positive

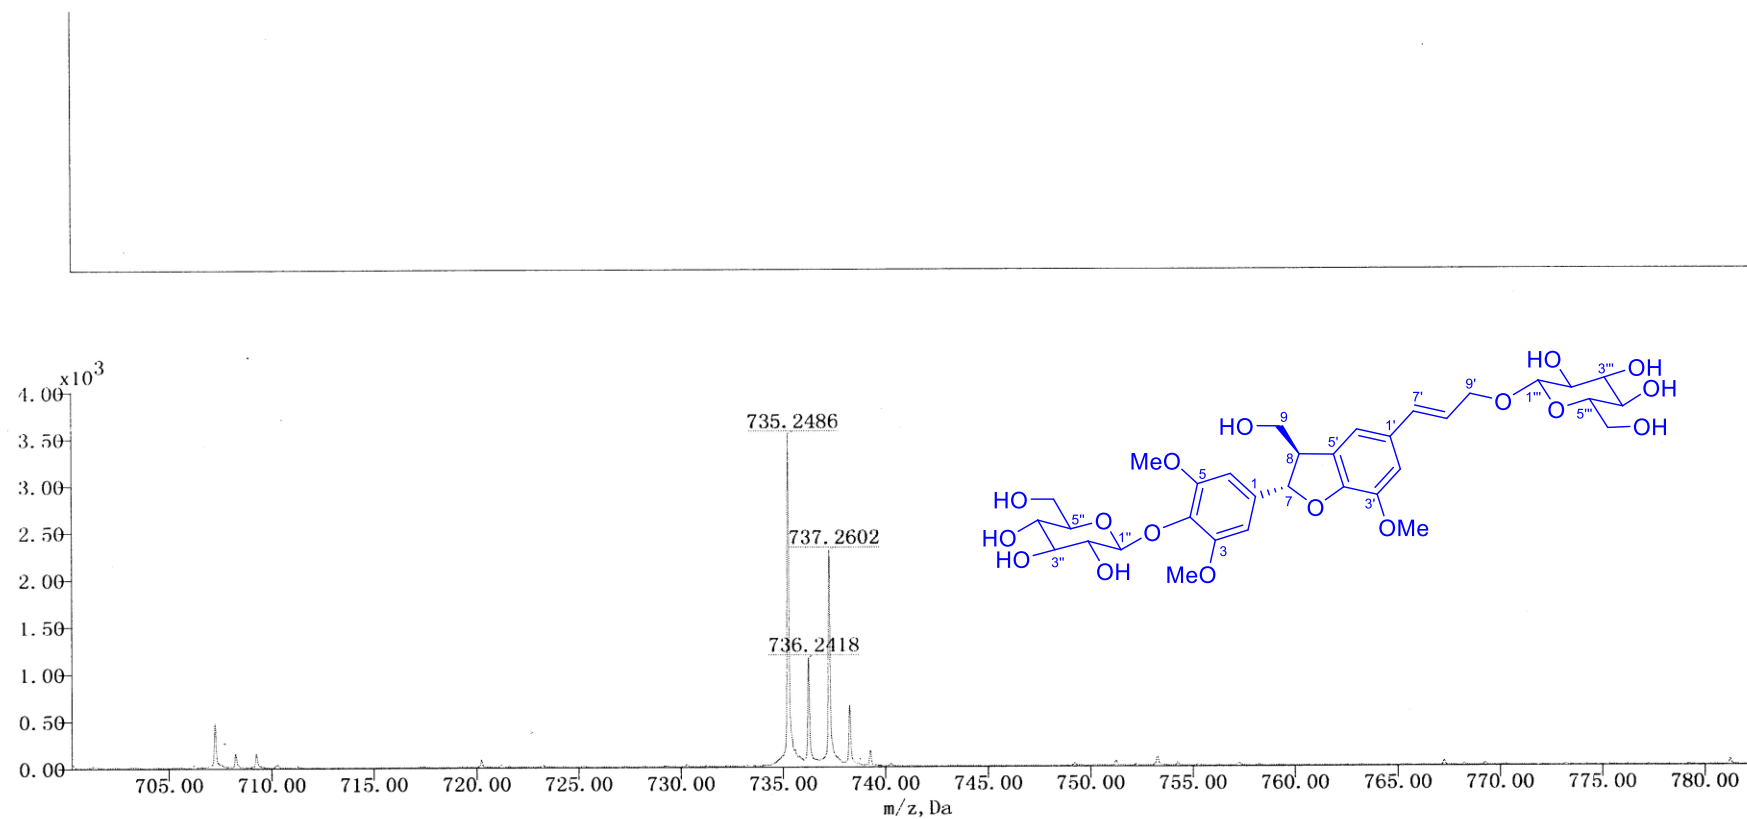

**Figure S64. The HRESIMS Spectrum of Compound 6**

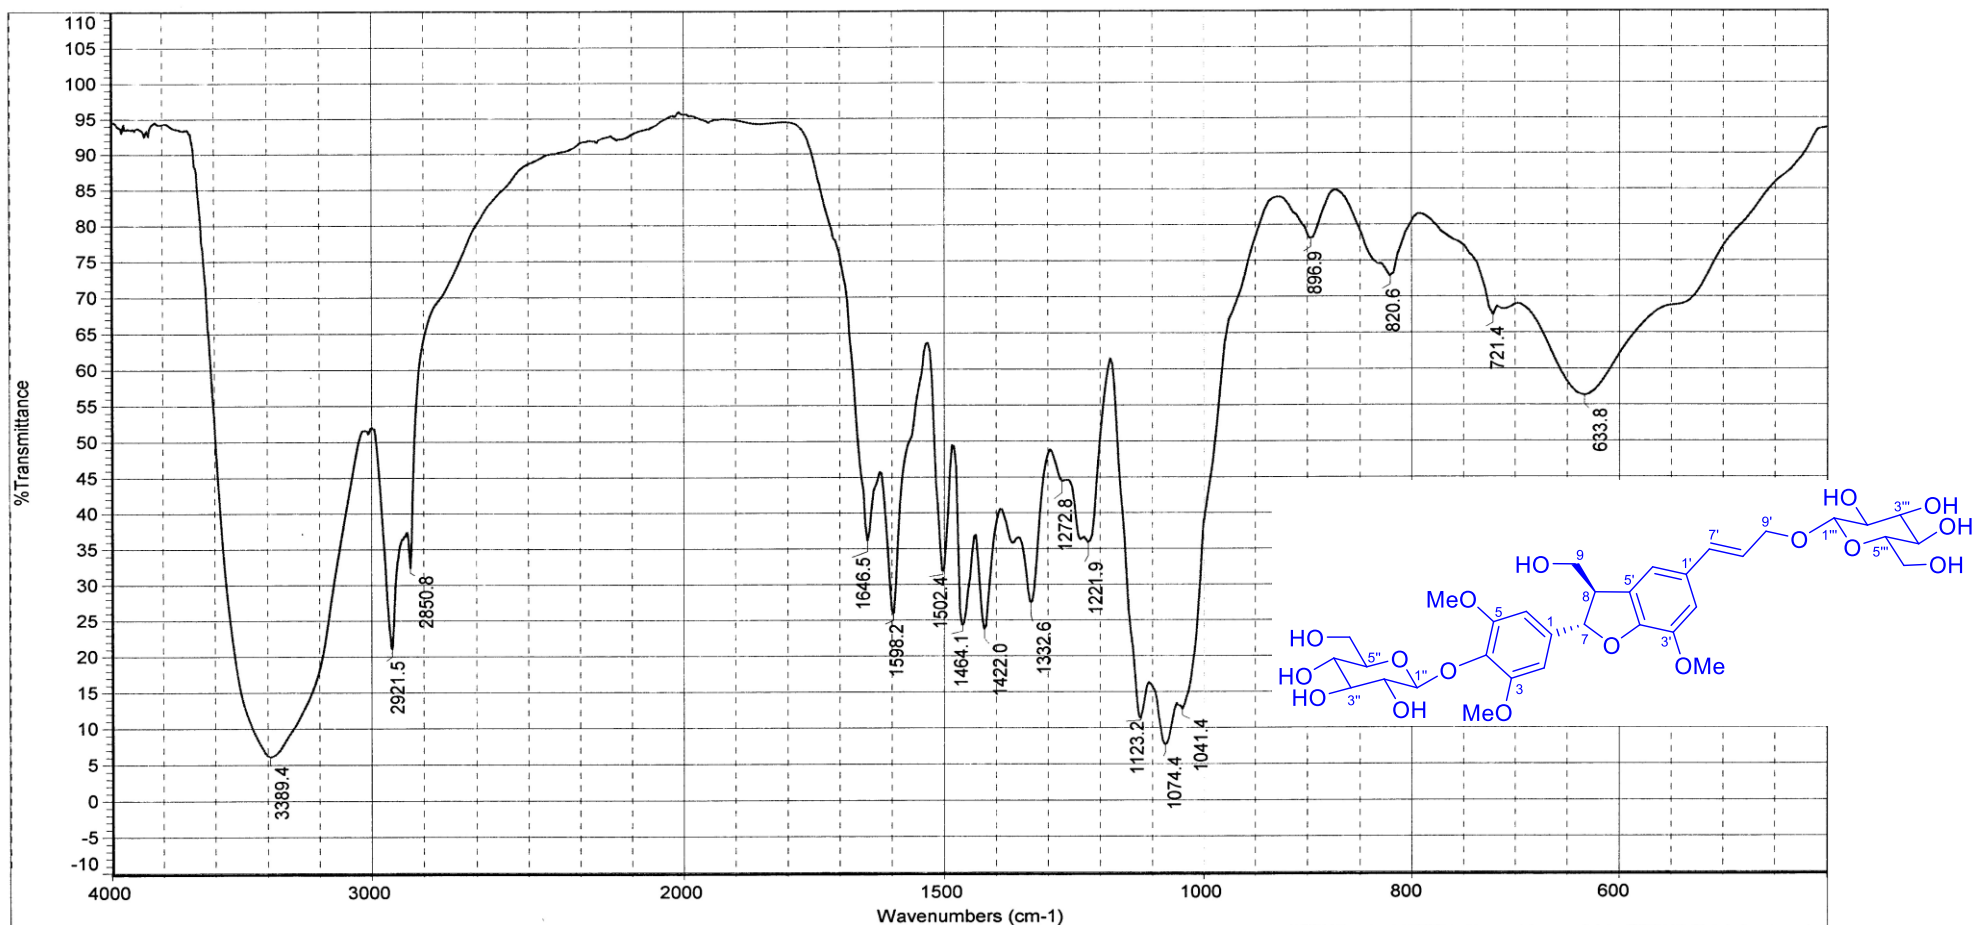

日期: 星期三 7月 01 10:08:01 2015 (GMT+08:00) Sample Name: sjj - w78

( 显微镜透射法 FT- IR Microscope Transmission)

扫描次数: 100

傅里叶变换显微镜红外(FT-IR Microscope): Centaurus

分辨率: 8.000

美国热电公司(Thermo)傅里叶变换红外光谱仪:Nicolet 5700

**Figure S65. The IR Spectrum of Compound 6**

Bruker AVIIIHD 600 20141229 sjj-w78  
PROTON CD3OD D:\\ DATA2014 1

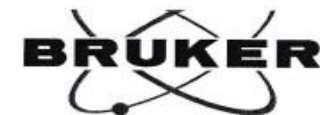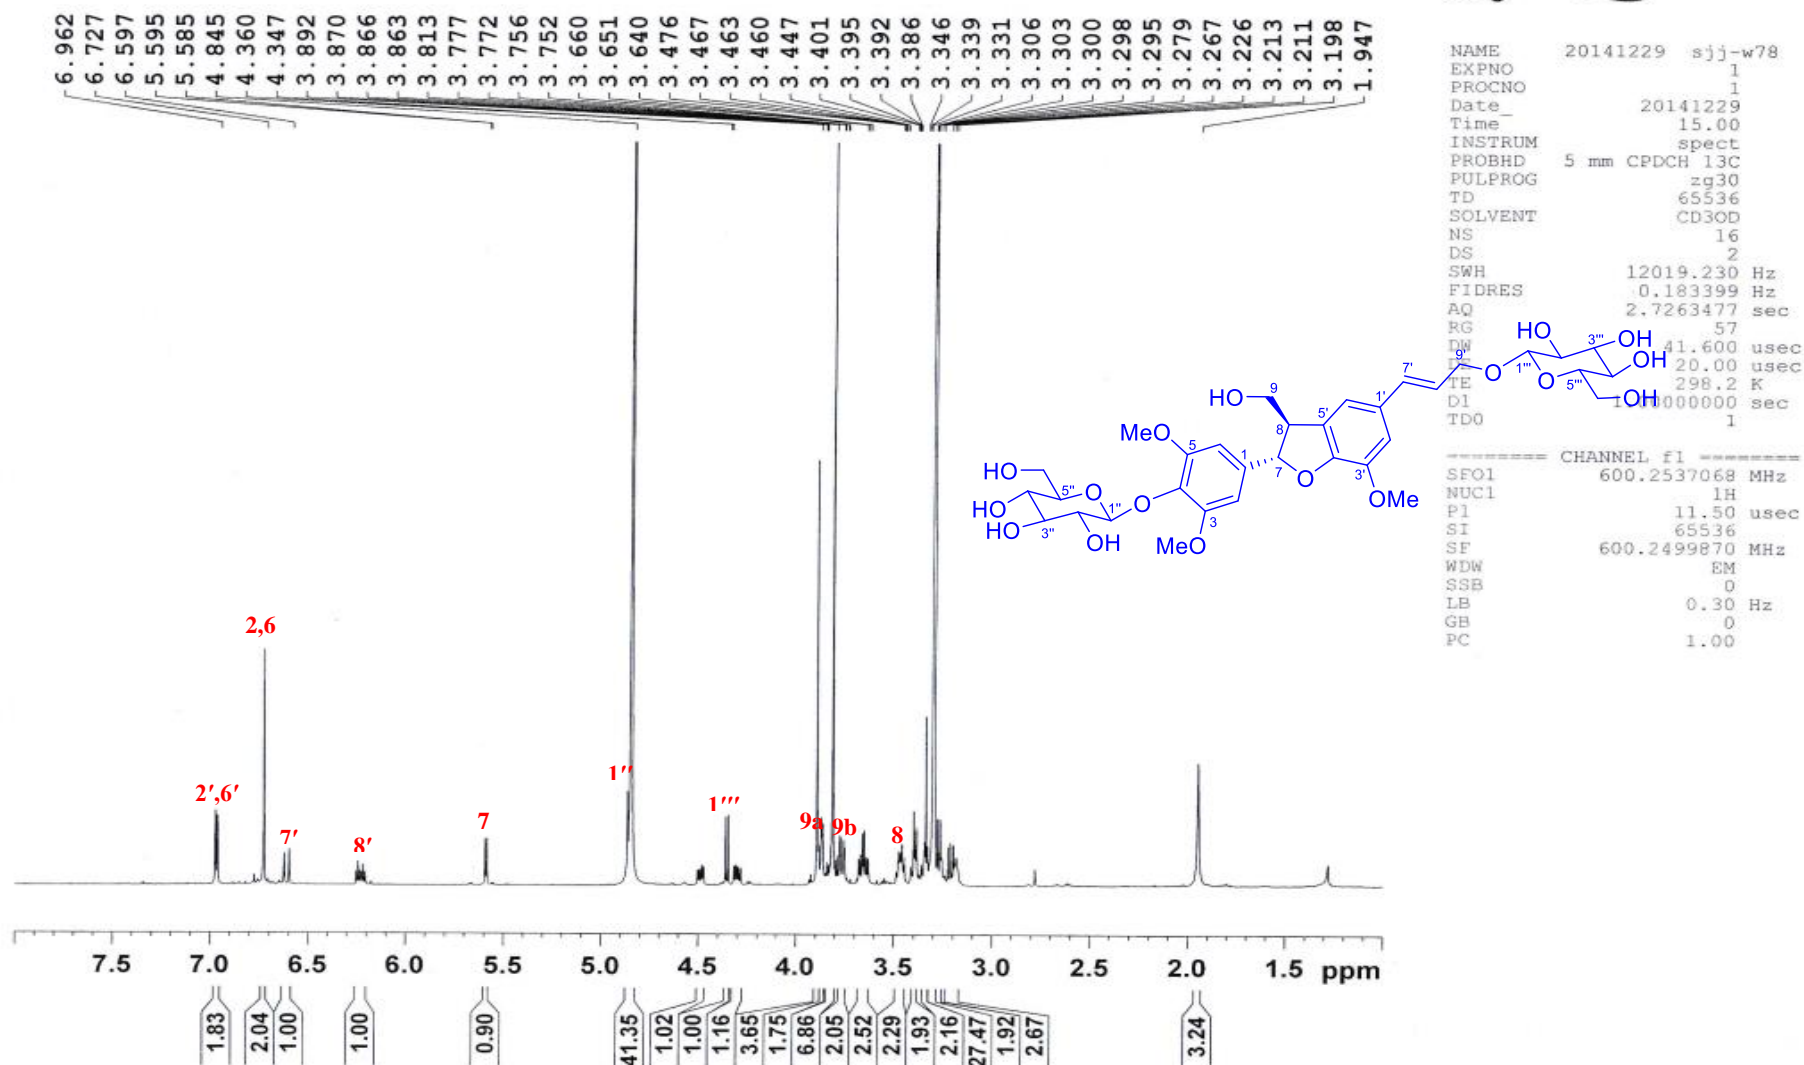

Figure S66. The  $^1\text{H}$  NMR Spectrum of Compound 6 in  $\text{MeOH-}d_4$  (600MHz)

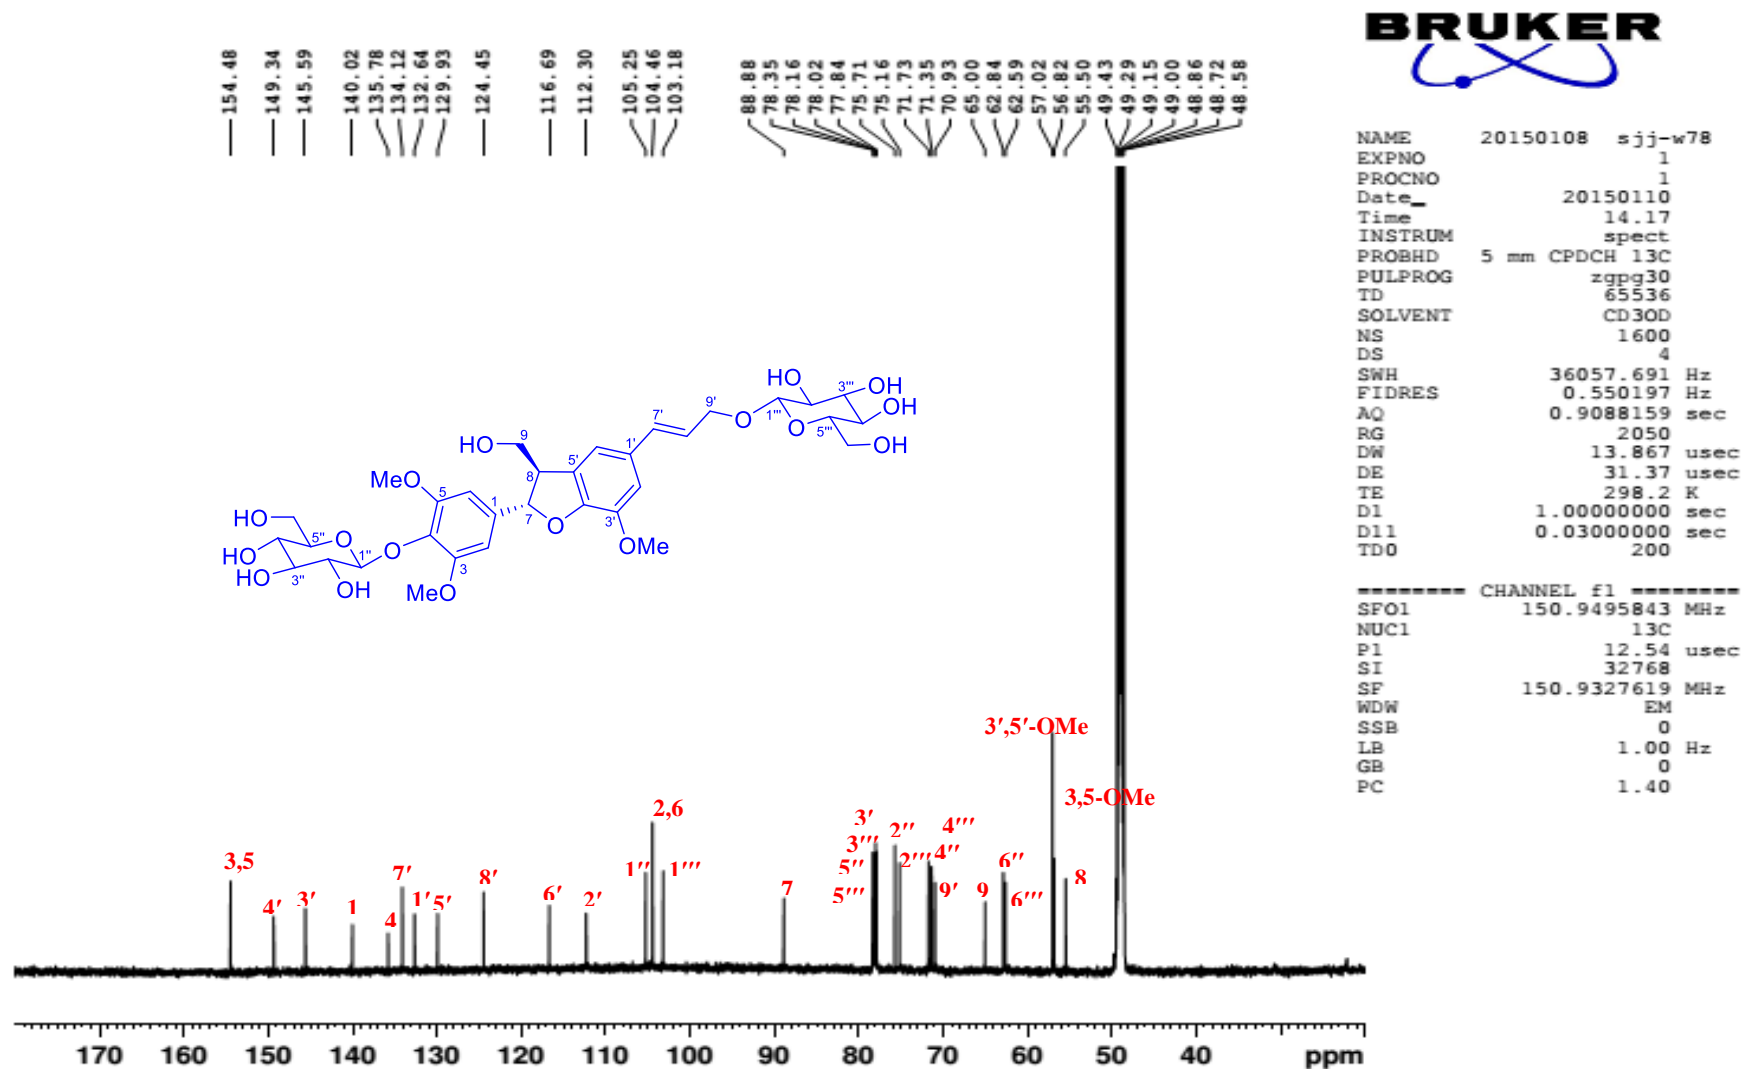

Figure S67. The <sup>13</sup>C NMR Spectrum of Compound 6 in MeOH-*d*<sub>4</sub> (150MHz)

SY\_MQF CD3OD D:\ DATA2015 50

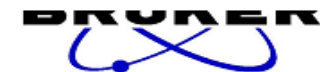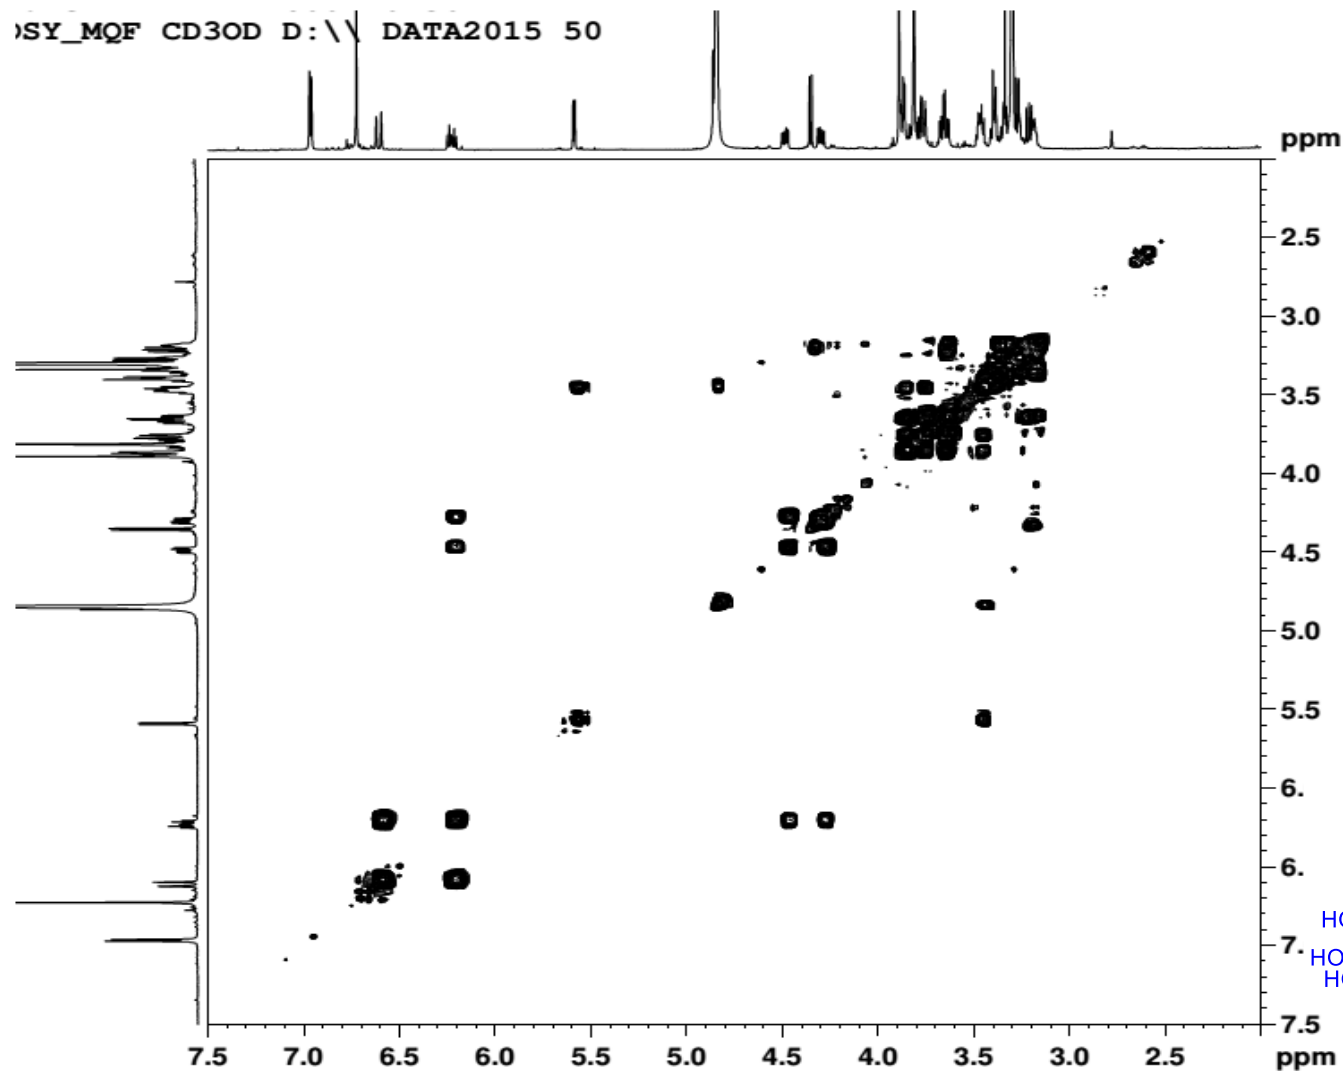

NAME 20150114 sjj-w78  
 EXPNO 2  
 PROCNO 1  
 Date\_ 20150118  
 Time 12.46  
 INSTRUM spect  
 PROBHD 5 mm CPDCH 13C  
 PULPROG cosygpmfzf  
 TD 2048  
 SOLVENT CD3OD  
 NS 4  
 DS 16  
 SWH 8417.509 Hz  
 FIDRES 4.110112 Hz  
 AQ 0.1217012 sec  
 RG 2050  
 DW 59.400 usec  
 DE 20.00 usec  
 TE 298.2 K  
 D0 0.00000300 sec  
 D1 2.00000000 sec  
 D13 0.00000400 sec  
 D16 0.00020000 sec  
 IN0 0.00011900 sec

===== CHANNEL f1 =====  
 SFO1 600.2540217 MHz  
 NUC1 1H  
 P1 11.50 usec  
 ND0 1  
 TD 128  
 SFO1 600.254 MHz  
 FIDRES 65.651260 Hz  
 SW 14.000 ppm  
 FnMODE QF  
 SI 1024  
 SF 600.2500000 MHz

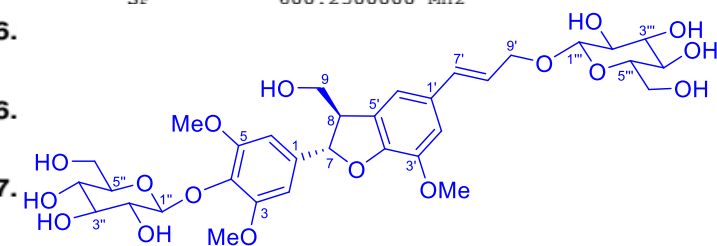

Figure S68. The  $^1\text{H}$ - $^1\text{H}$  COSY Spectrum of Compound 6 in  $\text{MeOH-}d_4$  (600MHz)

Bruker AVIIIHD 600 20150114  
HSQC CD3OD sjj-w78

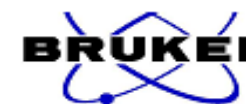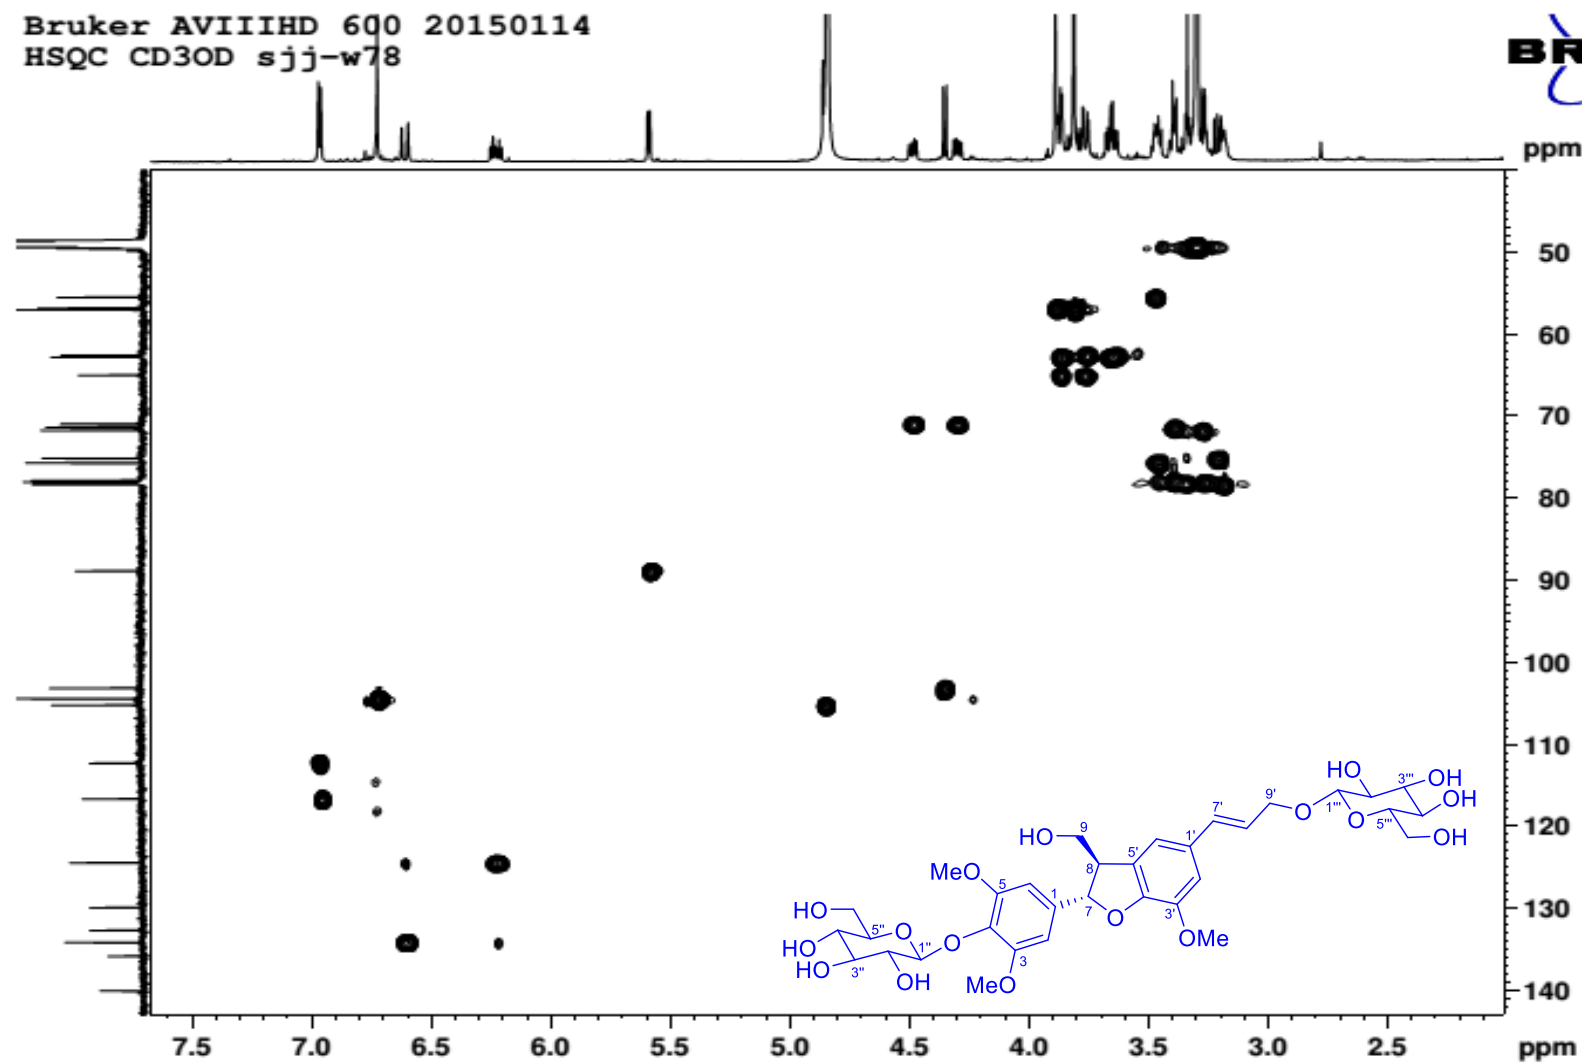

Figure S69. The HSQC Spectrum of Compound 6 in MeOH-*d*<sub>4</sub> (600MHz)

Bruker AVIIIHD 600 20150114  
{HMBC etgpl3nd} CD3OD

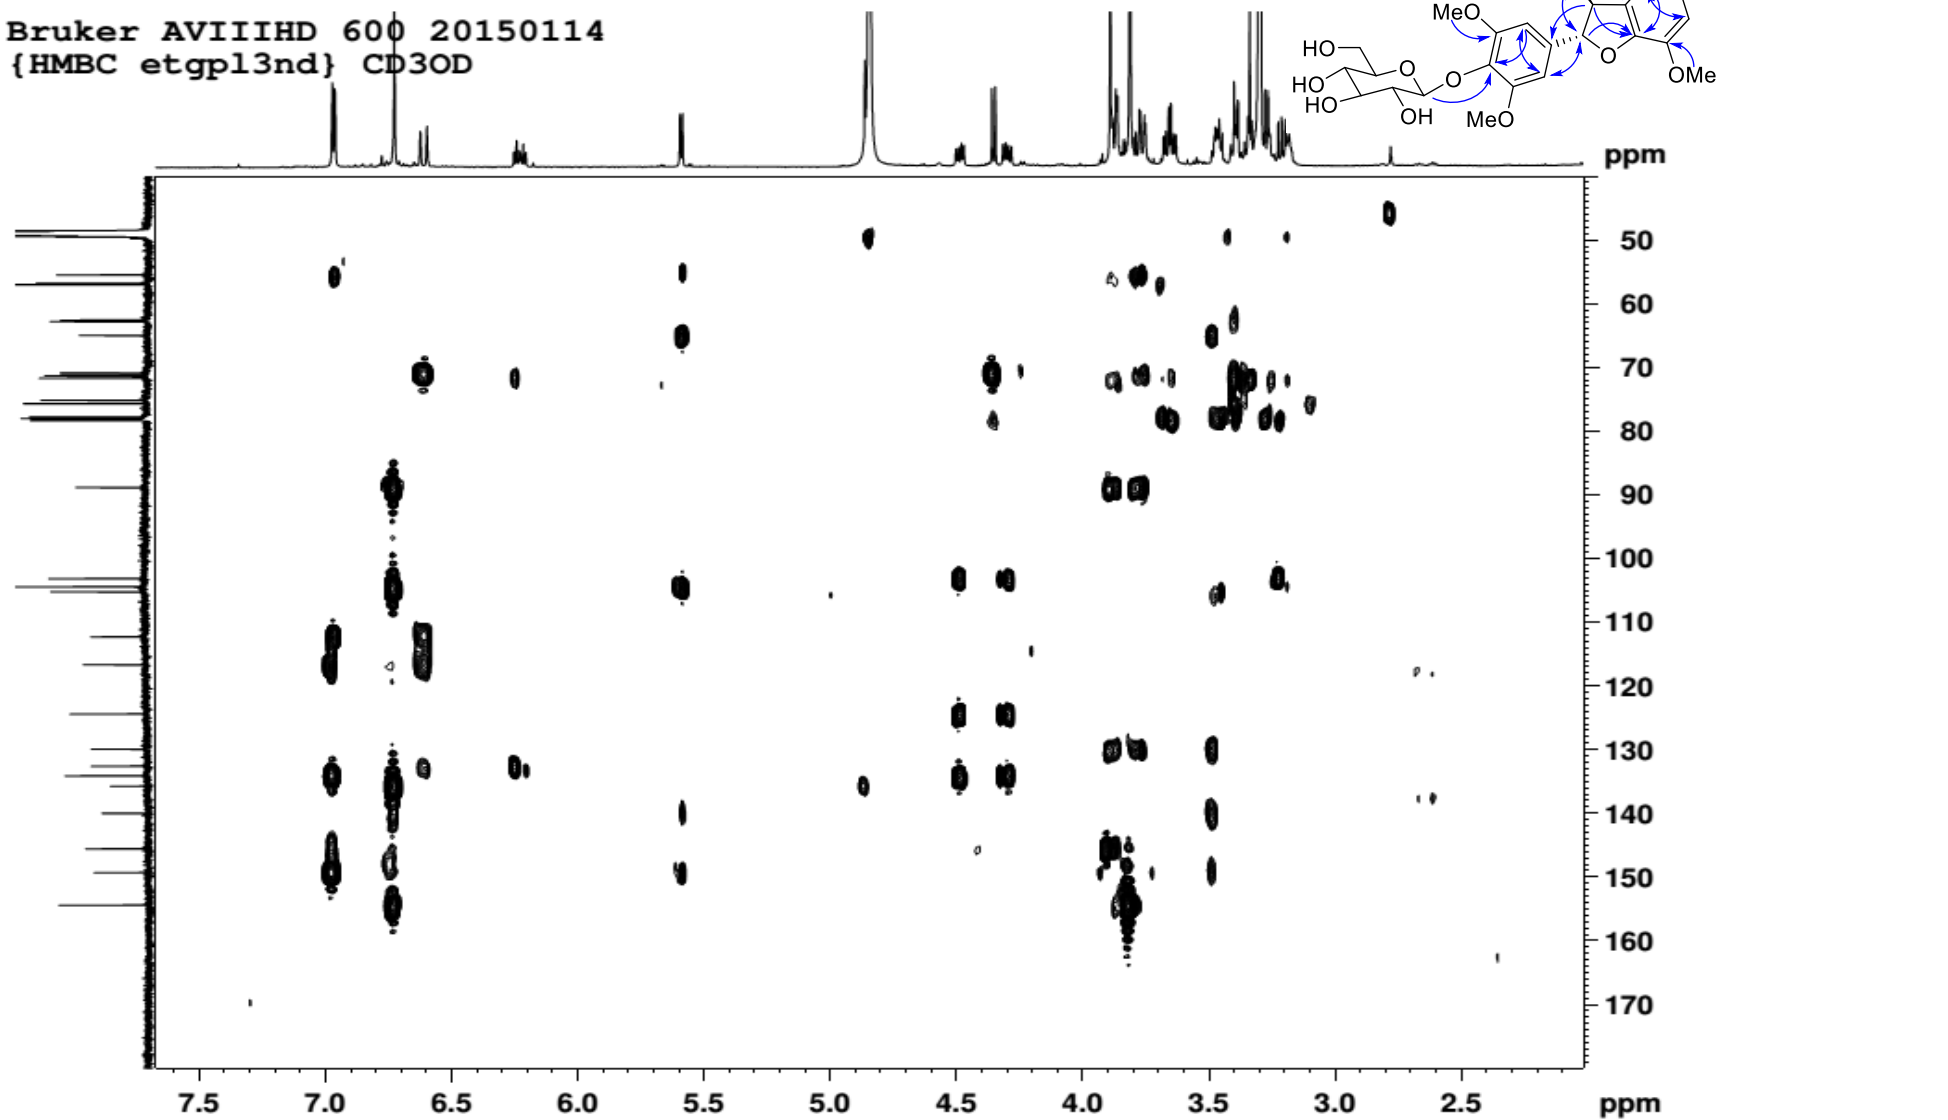

Figure S70. The HMBC Spectrum of Compound 6 in MeOH- $d_4$  (600MHz)

Bruker AVIIIHD 600 20151209  
NOESY\_2D MeOD D:\ DATA2015 42

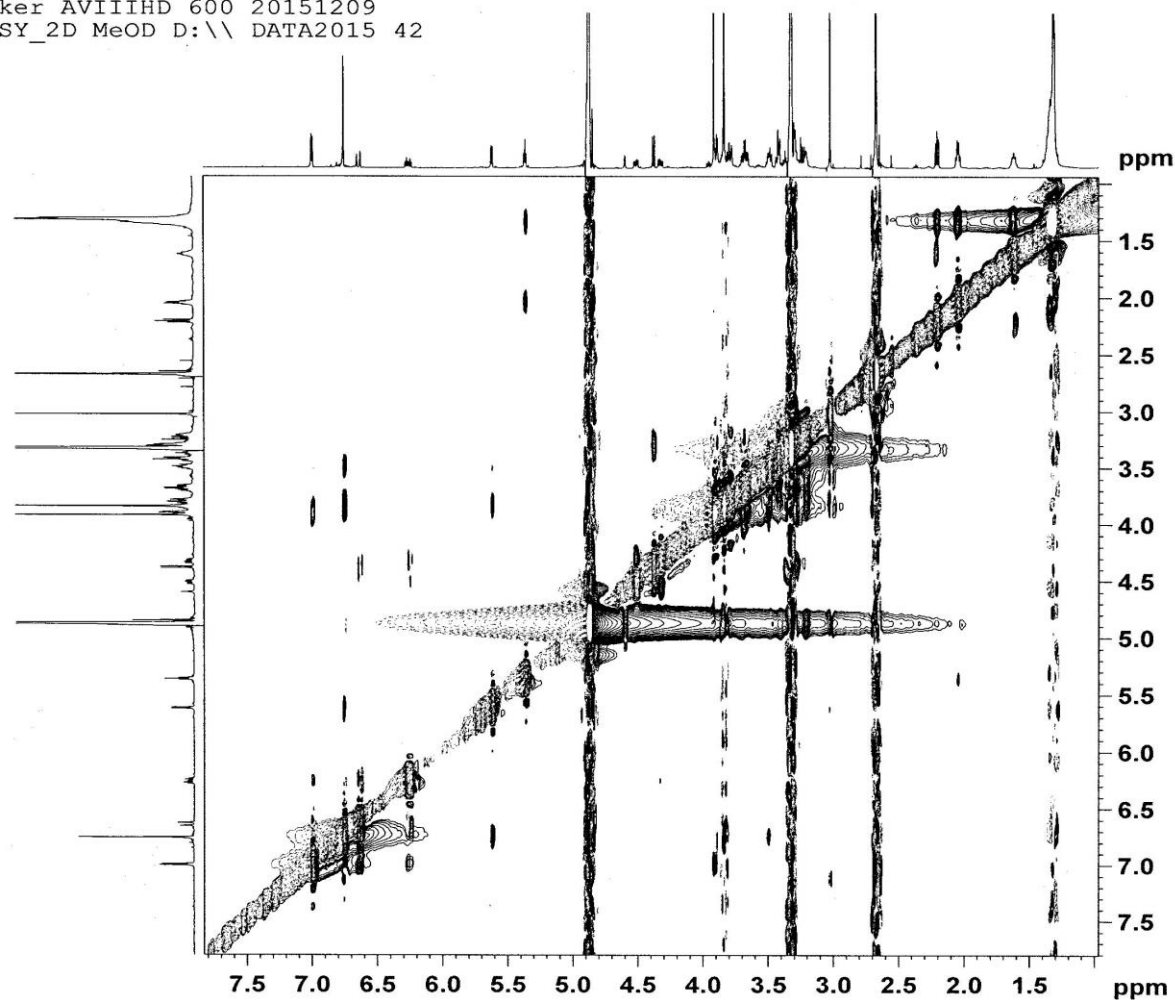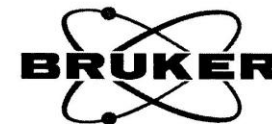

Current Data Parameters  
NAME 20151210 sjj-w78  
EXPNO 2  
PROCNO 1

F2 - Acquisition Parameters  
Date\_ 20151211  
Time\_ 18.26  
INSTRUM spect  
PROBHD 5 mm CPDCH 13C  
PULPROG noesygpphpg  
TD 2048  
SOLVENT MeOD  
NS 32  
DS 16  
SWH 8417.509 Hz  
FIDRES 4.110112 Hz  
AQ 0.1216512 sec  
RG 144  
DW 59.400 usec  
DE 20.00 usec  
TE 298.0 K  
D0 0.00004476 sec  
D1 1.20000005 sec  
D8 0.60000002 sec  
D11 0.03000000 sec  
D12 0.00002000 sec  
D16 0.00020000 sec  
INO 0.00011880 sec

----- CHANNEL f1 -----  
SFO1 600.2539016 MHz  
NUC1 1H  
P1 11.50 usec  
P2 23.00 usec  
P17 2500.00 usec  
PLW1 12.93200016 W  
PLW10 2.52999997 W

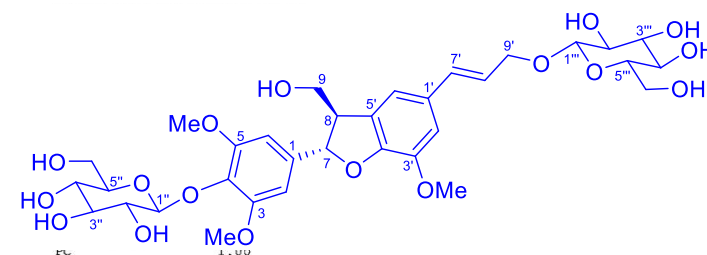

F1 - Processing parameters  
SI 1024  
MC2 States-TPPI  
SF 600.2500000 MHz  
WDW QSINE  
SSB 2  
LB 0 Hz  
GB 0

Figure S71. The NOESY Spectrum of Compound 6 in MeOH- $d_4$  (600MHz)

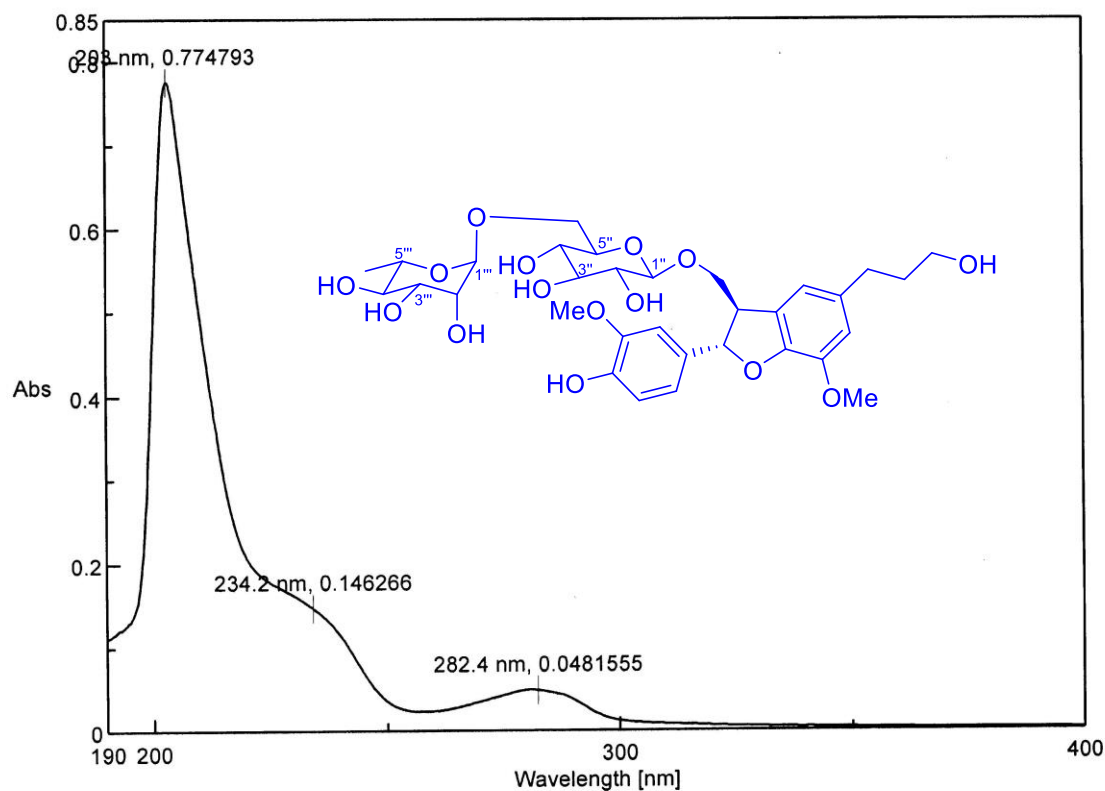

[Comment]  
 Sample Name sij-w111  
 Comment 0.02  
 User  
 Division UV  
 Company 324  
 [Measurement Information]  
 Instrument Name V-650  
 Model Name V-650  
 Serial No. A034461150

Accessory PSC-718  
 Accessory S/N A001761114  
 Position 1  
 Cell Length 10 mm  
 Temperature 19.45 C  
 Control Sensor Holder  
 Monitor Sensor Holder  
 Start Mode Start immediately

Photometric Mode Abs  
 Measurement range 400 - 190 nm  
 Data pitch 0.2 nm  
 Band width(UV/Vis) 2.0 nm  
 Response Medium  
 Scanning speed 200 nm/min  
 Source Change 340 nm  
 Light Source D2/M1  
 Filter Exchange Step  
 Correction Baseline

[Data Information]  
 Creation Date 2016-1-19 19:20  
 Data array type Linear data array  
 Horizontal Wavelength [nm]  
 Vertical Abs  
 Start 400 nm  
 End 190 nm  
 Data pitch 0.2 nm  
 Data points 1051

DBT-0.02-39

**Figure S72. The UV Spectrum of Compound 7 in MeOH**

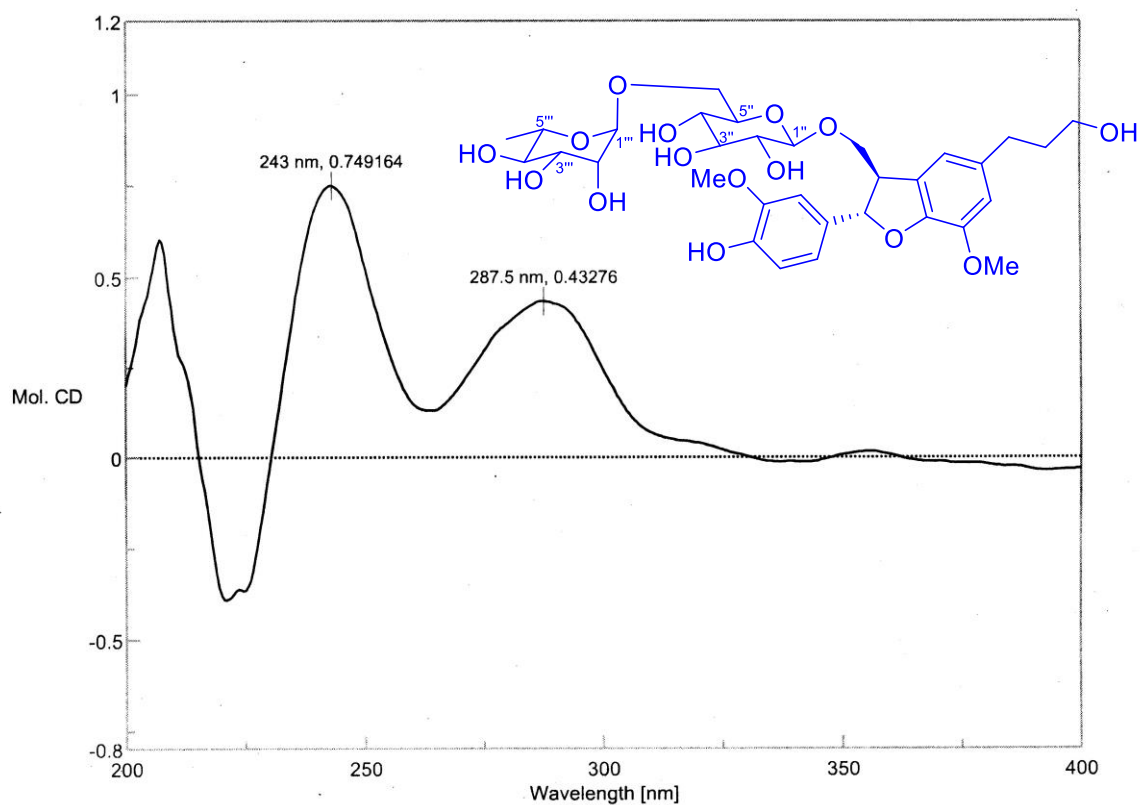

[Comments]  
 Sample name sjj-W111  
 Comment  
 User  
 Division  
 Company dell

[Measurement Information]  
 Instrument Name J-815  
 Model Name J-815  
 Serial No. A024461168

Accessory Standard  
 Accessory S/N A024461168  
 Cell Length 1 mm

Photometric Mode CD, HT, Abs  
 Measure Range 400 - 200 nm  
 Data pitch 0.5 nm  
 Sensitivity Standard  
 D.I.T. 1 sec  
 Band width 2.00 nm  
 Start Mode Immediately  
 Scanning Speed 100 nm/min  
 Baseline Correction Baseline  
 Shutter Control Auto  
 PMT Voltage Auto  
 Accumulations 2  
 Solvent MEOH  
 Concentration 0.5 (w/v)%

[Detailed Information]  
 Creation date 2015-10-19 16:18

Data array type Linear data array \* 3  
 Horizontal axis Wavelength [nm]  
 Vertical axis(1) Mol. CD  
 Vertical axis(2) HT [V]  
 Vertical axis(3) Abs  
 Start 400 nm  
 End 200 nm  
 Data interval 0.5 nm  
 Data points 401

**Figure S73. The CD Spectrum of Compound 7 in MeOH**

## Compound Mass Spectrum Report - MS

**Analysis Name:** 15092919.d

**Instrument:** LC-MSD-Trap-SL

**Print Date:** 2015-10-8 10:23:06

**Method:** WANGSJ-MS.m

**Operator:** Operator

**Acq. Date:** 2015-9-29 11:04:13

**Sample Name:** SJJ-w111

**Analysis Info:**

### Acquisition Parameter:

|                 |            |                       |             |                |           |
|-----------------|------------|-----------------------|-------------|----------------|-----------|
| Mass Range Mode | Std/Normal | Trap Drive            | 53.0        | Scan Begin     | 100 m/z   |
| Ion Polarity    | Positive   | Skim 1                | -40.0 Volt  | Scan End       | 1000 m/z  |
| Ion Source Type | ESI        | Skim 2                | 5.0 Volt    | Averages       | 5 Spectra |
| Dry Temp (Set)  | 300 度      | Octopole RF Amplitude | 171.0 Vpp   | Max. Accu Time | 300000 釐  |
| Nebulizer (Set) | 15.00 psi  | Capillary Exit        | -121.0 Volt | ICC Target     | 30000     |
| Dry Gas (Set)   | 6.00 l/min |                       |             | Charge Control | on        |

### +MS, 0.4min #16

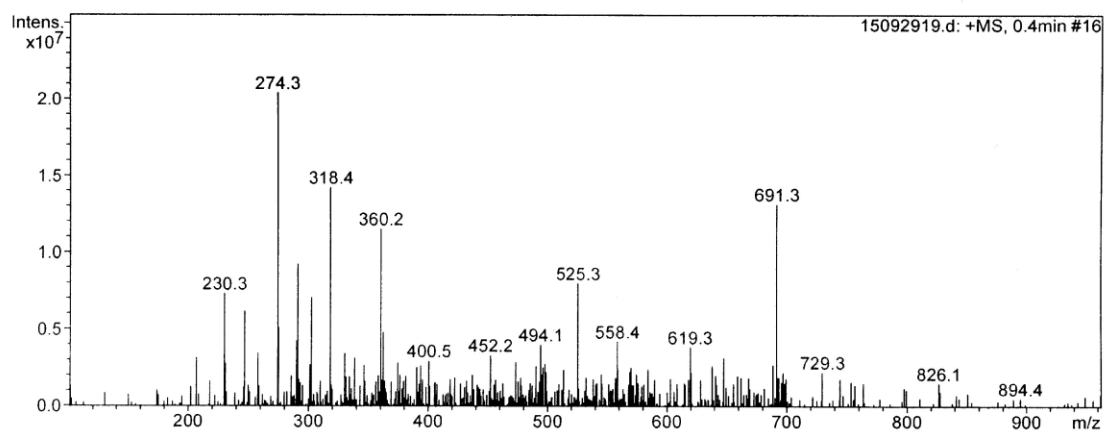

### -MS, 0.3min #13

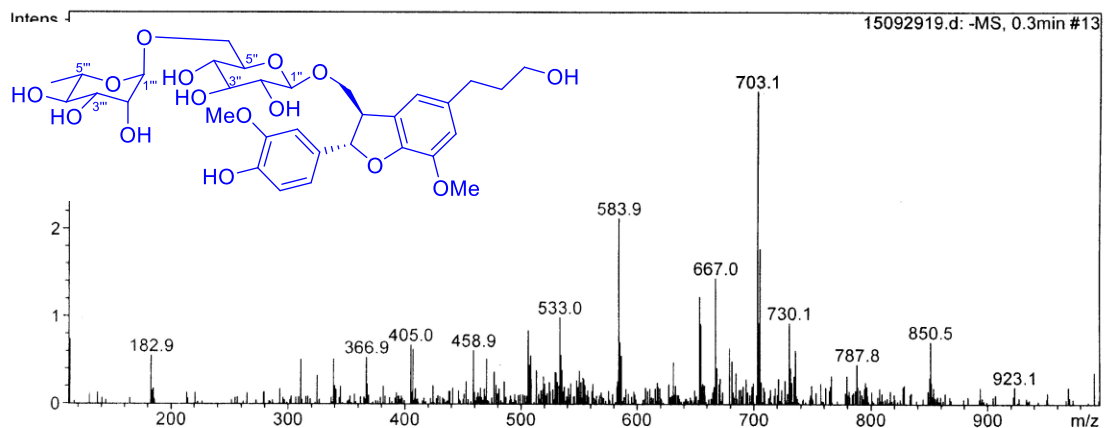

**Figure S74. The ESIMS Spectrum of Compound 7**

## Qualitative Analysis Report

**Data Filename** 2015092201.d  
**Sample Type** Sample  
**Instrument Name** Instrument 1  
**Acq Method**  
**DA Method** TEST LCMS.m

**Sample Name** Sjj-WIII  
**Position** P1-C6  
**User Name**  
**IRM Calibration Status** Success  
**Comment**

### User Chromatograms

**Fragmentor Voltage** 120    **Collision Energy** 0    **Ionization Mode** ESI

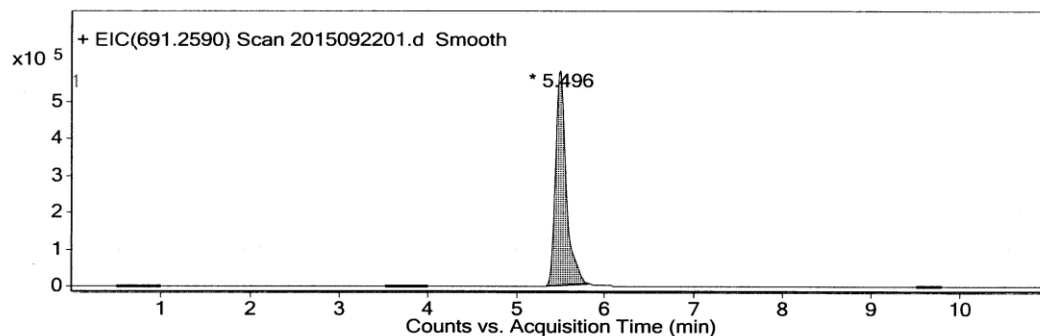

#### Integration Peak List

| Peak | Start | RT    | End   | Height | Area    | Area % | Signal To Noise |
|------|-------|-------|-------|--------|---------|--------|-----------------|
| 1    | 5.335 | 5.496 | 5.834 | 582268 | 5022024 | 100    | Infinity        |

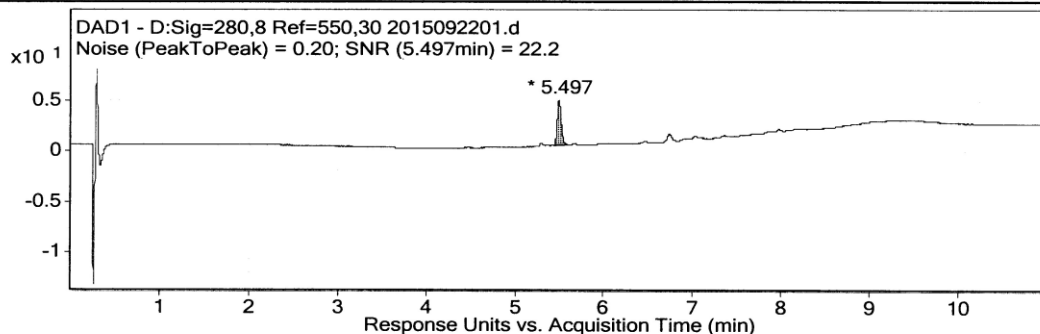

#### Integration Peak List

| Peak | Start | RT    | End   | Height | Area  | Area % | Signal To Noise |
|------|-------|-------|-------|--------|-------|--------|-----------------|
| 1    | 5.428 | 5.497 | 5.593 | 4.45   | 13.91 | 100    | 22.2            |

### User Spectra

**Fragmentor Voltage** 120    **Collision Energy** 0    **Ionization Mode** ESI

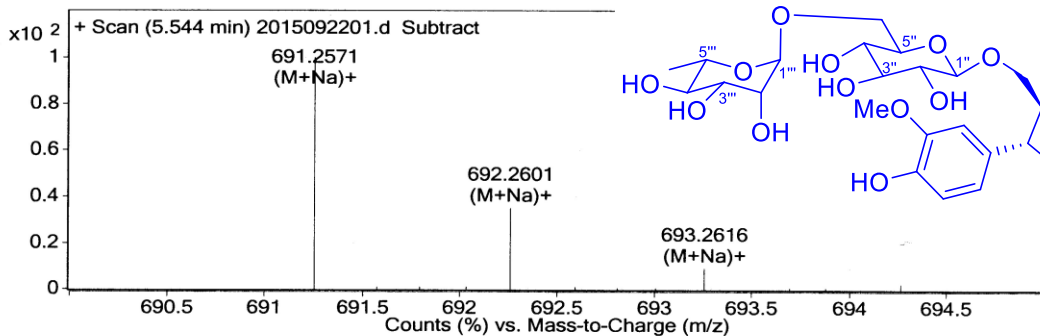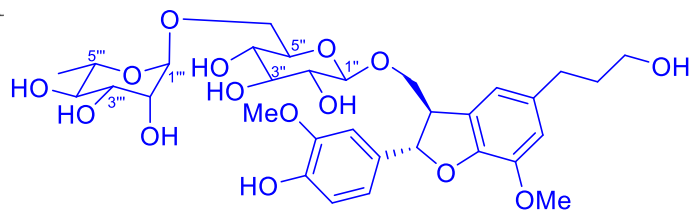

**Figure S75. The HRESIMS Spectrum of Compound 7**

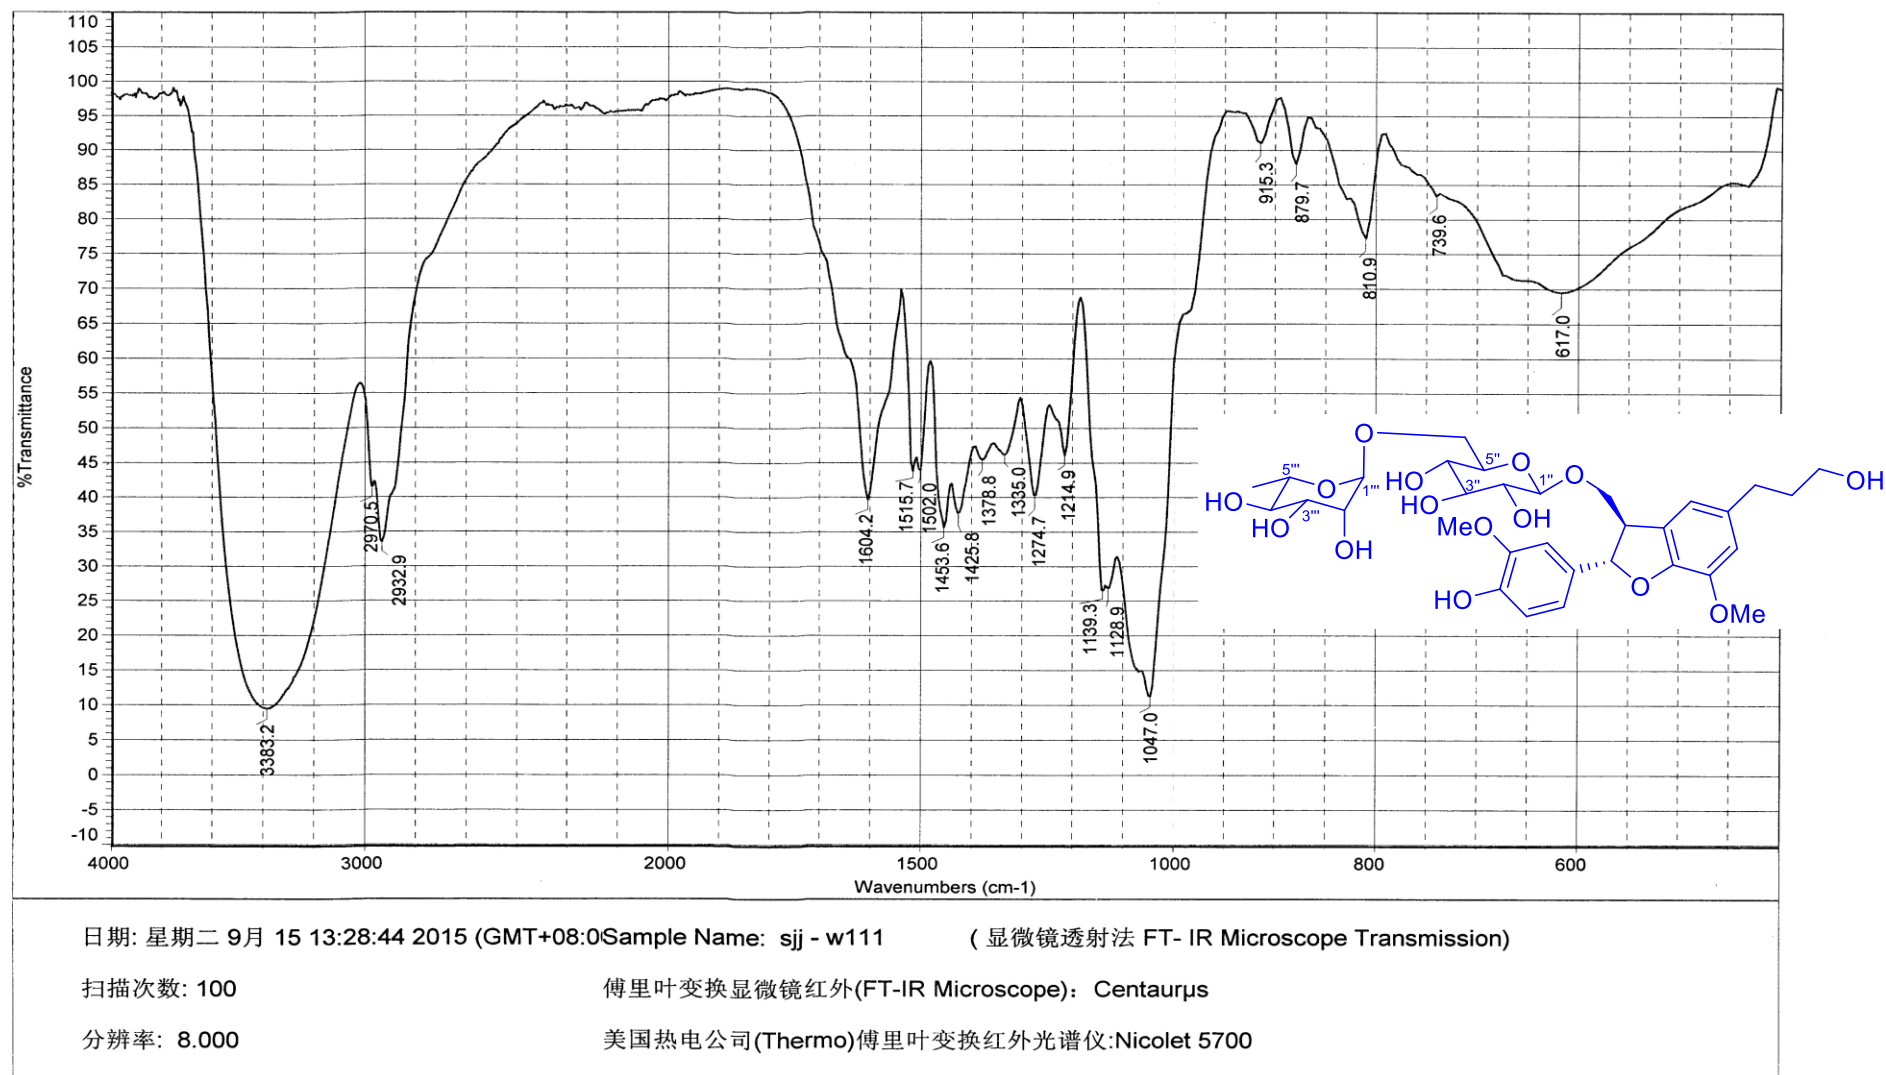

**Figure S76. The IR Spectrum of Compound 7**

Bruker AVIIIHD 600 20150609  
PROTON CD3OD sjj-w111

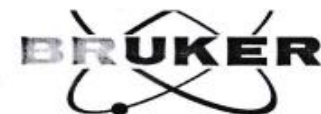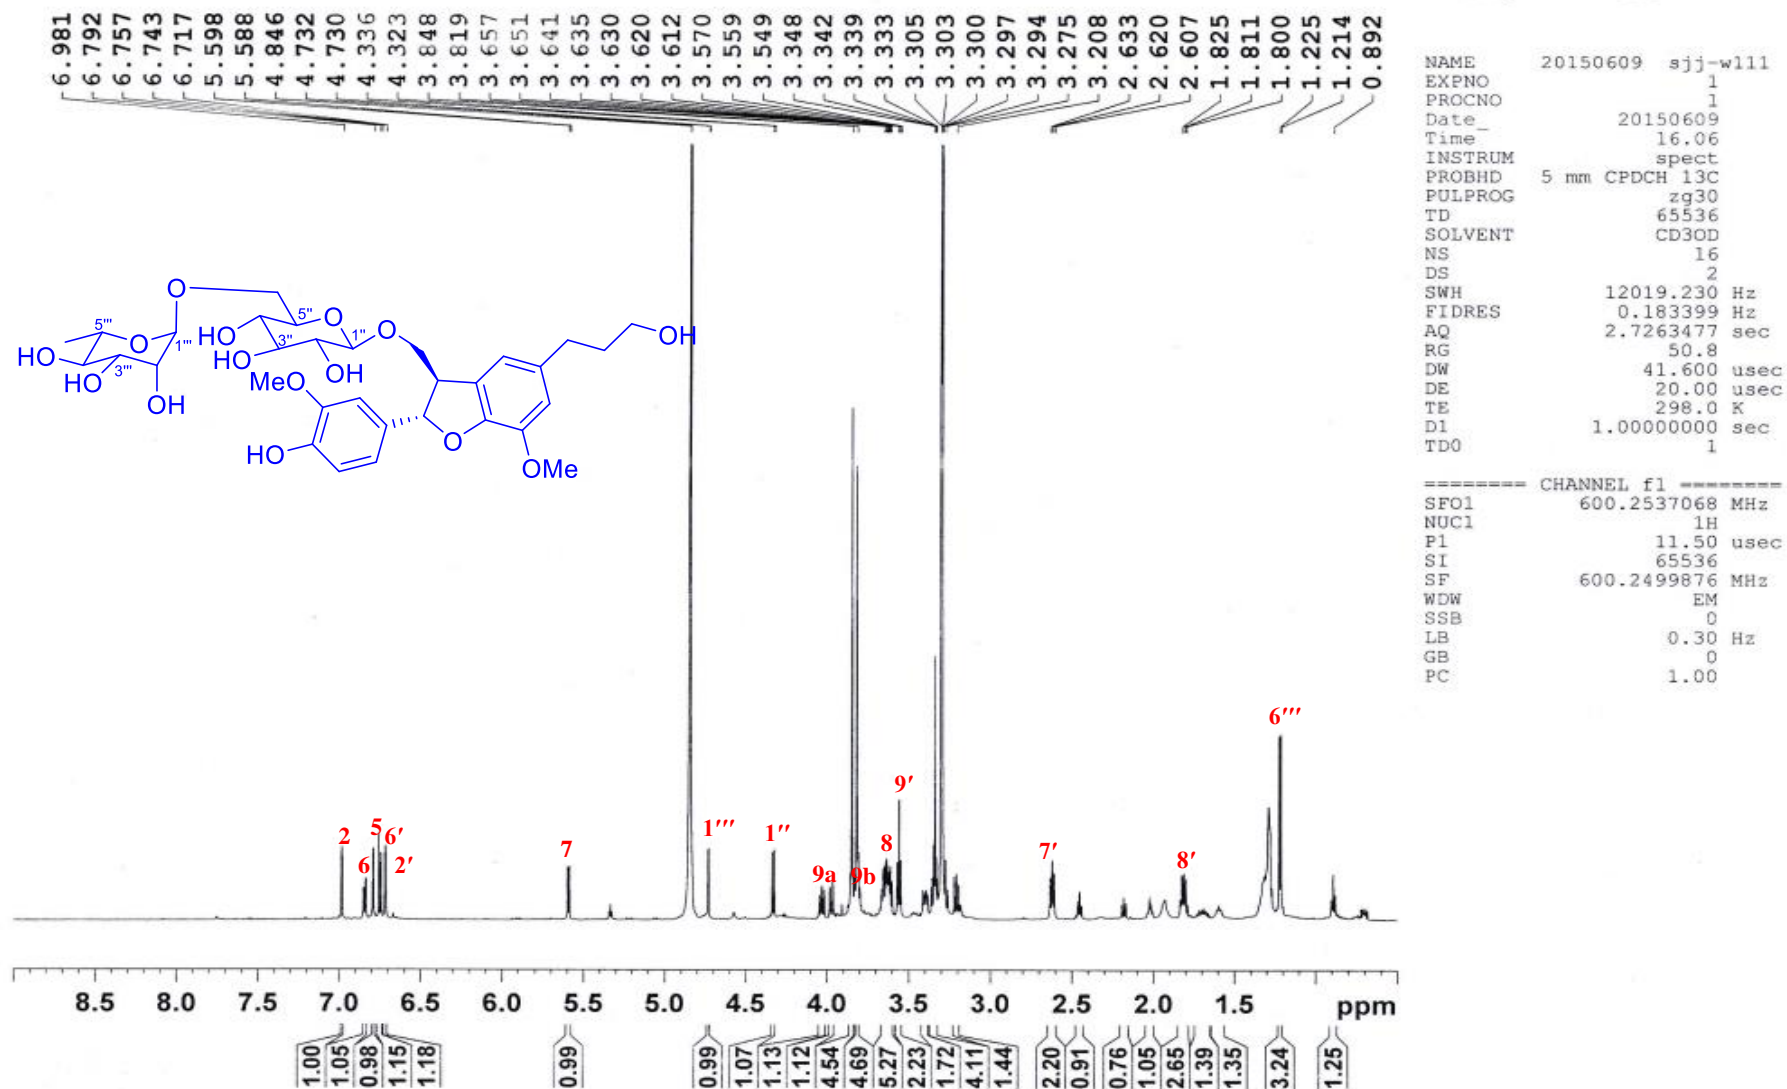

Figure S77. The <sup>1</sup>H NMR Spectrum of Compound 7 in MeOH-d<sub>4</sub> (600MHz)

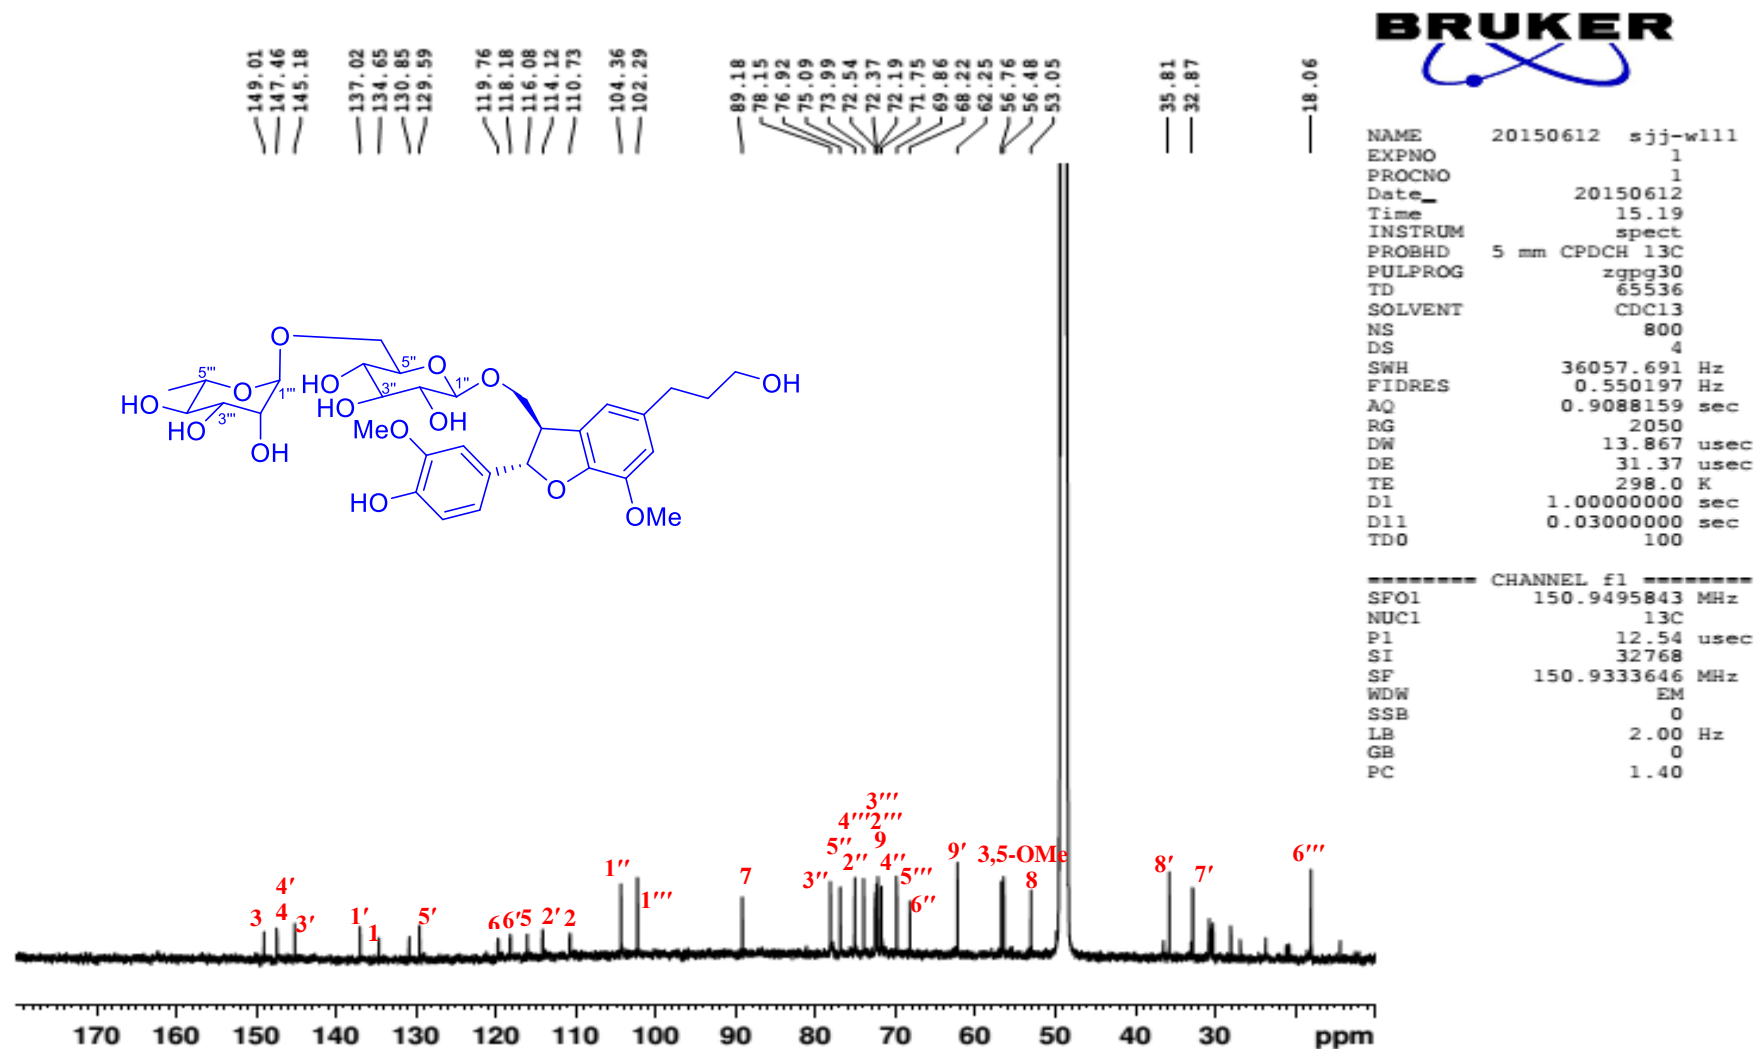

Figure S78. The  $^{13}\text{C}$  NMR Spectrum of Compound 7 in  $\text{MeOH-}d_4$  (150MHz)

Bruker AVIIIHD 600 20150902  
 COSY\_MQF CD3OD D:\\ DATA2015 33

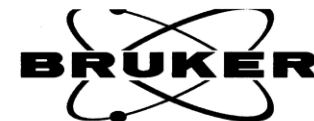

NAME 20150902 sjj-w111  
 EXPNO 2  
 PROCNO 1  
 Date\_ 20150904  
 Time\_ 2.27  
 INSTRUM spect  
 PROBHD 5 mm CPDCH 13C  
 PULPROG cosygpmfqf  
 TD 2048  
 SOLVENT CD3OD  
 NS 4  
 DS 16  
 SWH 8417.509 Hz  
 FIDRES 4.110112 Hz  
 AQ 0.1217012 sec  
 RG 2050  
 DW 59.400 usec  
 DE 20.00 usec  
 TE 298.0 K  
 D0 0.00000300 sec  
 D1 2.00000000 sec  
 D13 0.00000400 sec  
 D16 0.00020000 sec  
 IN0 0.00011900 sec

===== CHANNEL f1 =====  
 SFO1 600.2540217 MHz  
 NUC1 1H  
 P1 11.50 usec  
 ND0 1  
 TD 128

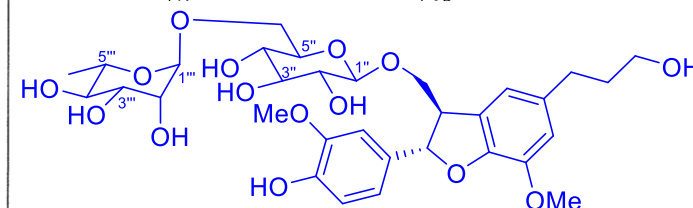

MC2 QF  
 SF 600.2500000 MHz  
 WDW SINE  
 SSB 0  
 LB 0.00 Hz  
 GB 0

8.0 7.5 7.0 6.5 6.0 5.5 5.0 4.5 4.0 3.5 3.0 2.5 2.0 1.5 ppm

Figure S79. The  $^1\text{H}$ - $^1\text{H}$  COSY Spectrum of Compound 7 in MeOH- $d_4$  (600MHz)

Bruker AVIIIHD 600 20150902  
HSQC CD3OD D:\\ DATA2015 33

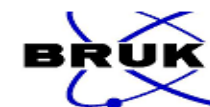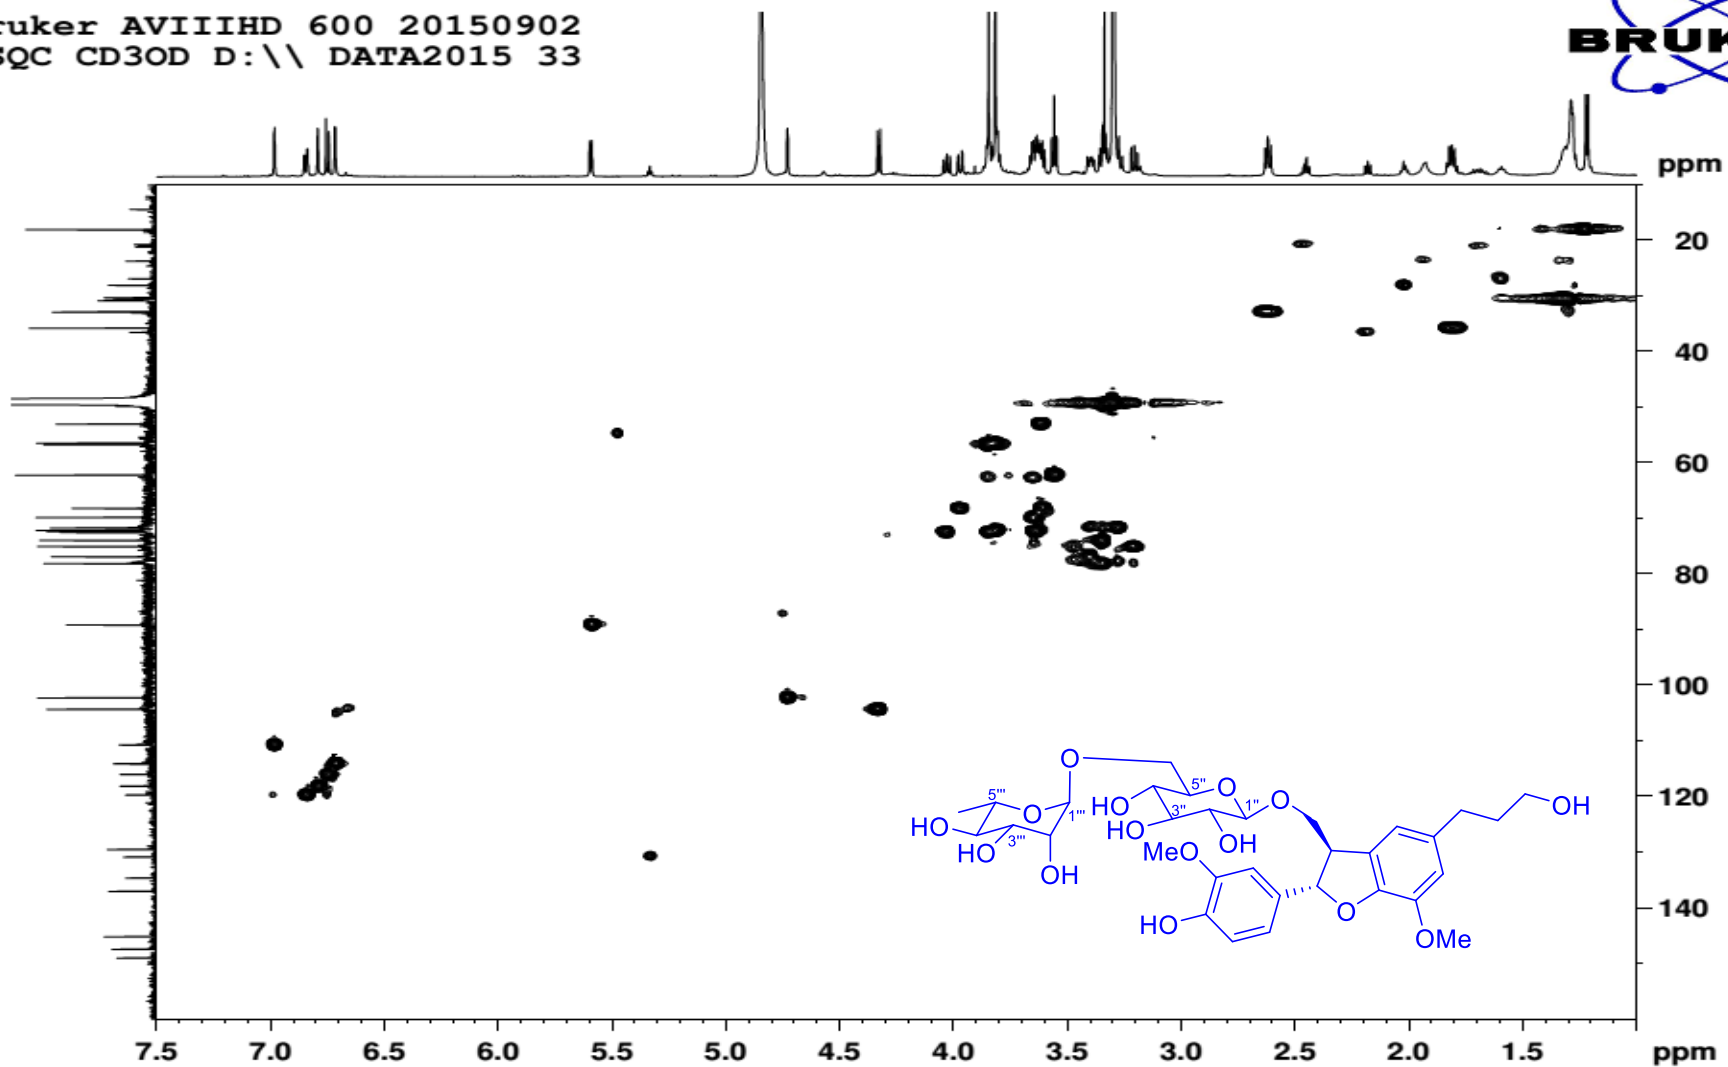

Figure S80. The HSQC Spectrum of Compound 7 in MeOH- $d_4$  (600MHz)

Bruker AVIIIHD 600 20150713  
HMBC CD3OD D:\\ DATA2015 51

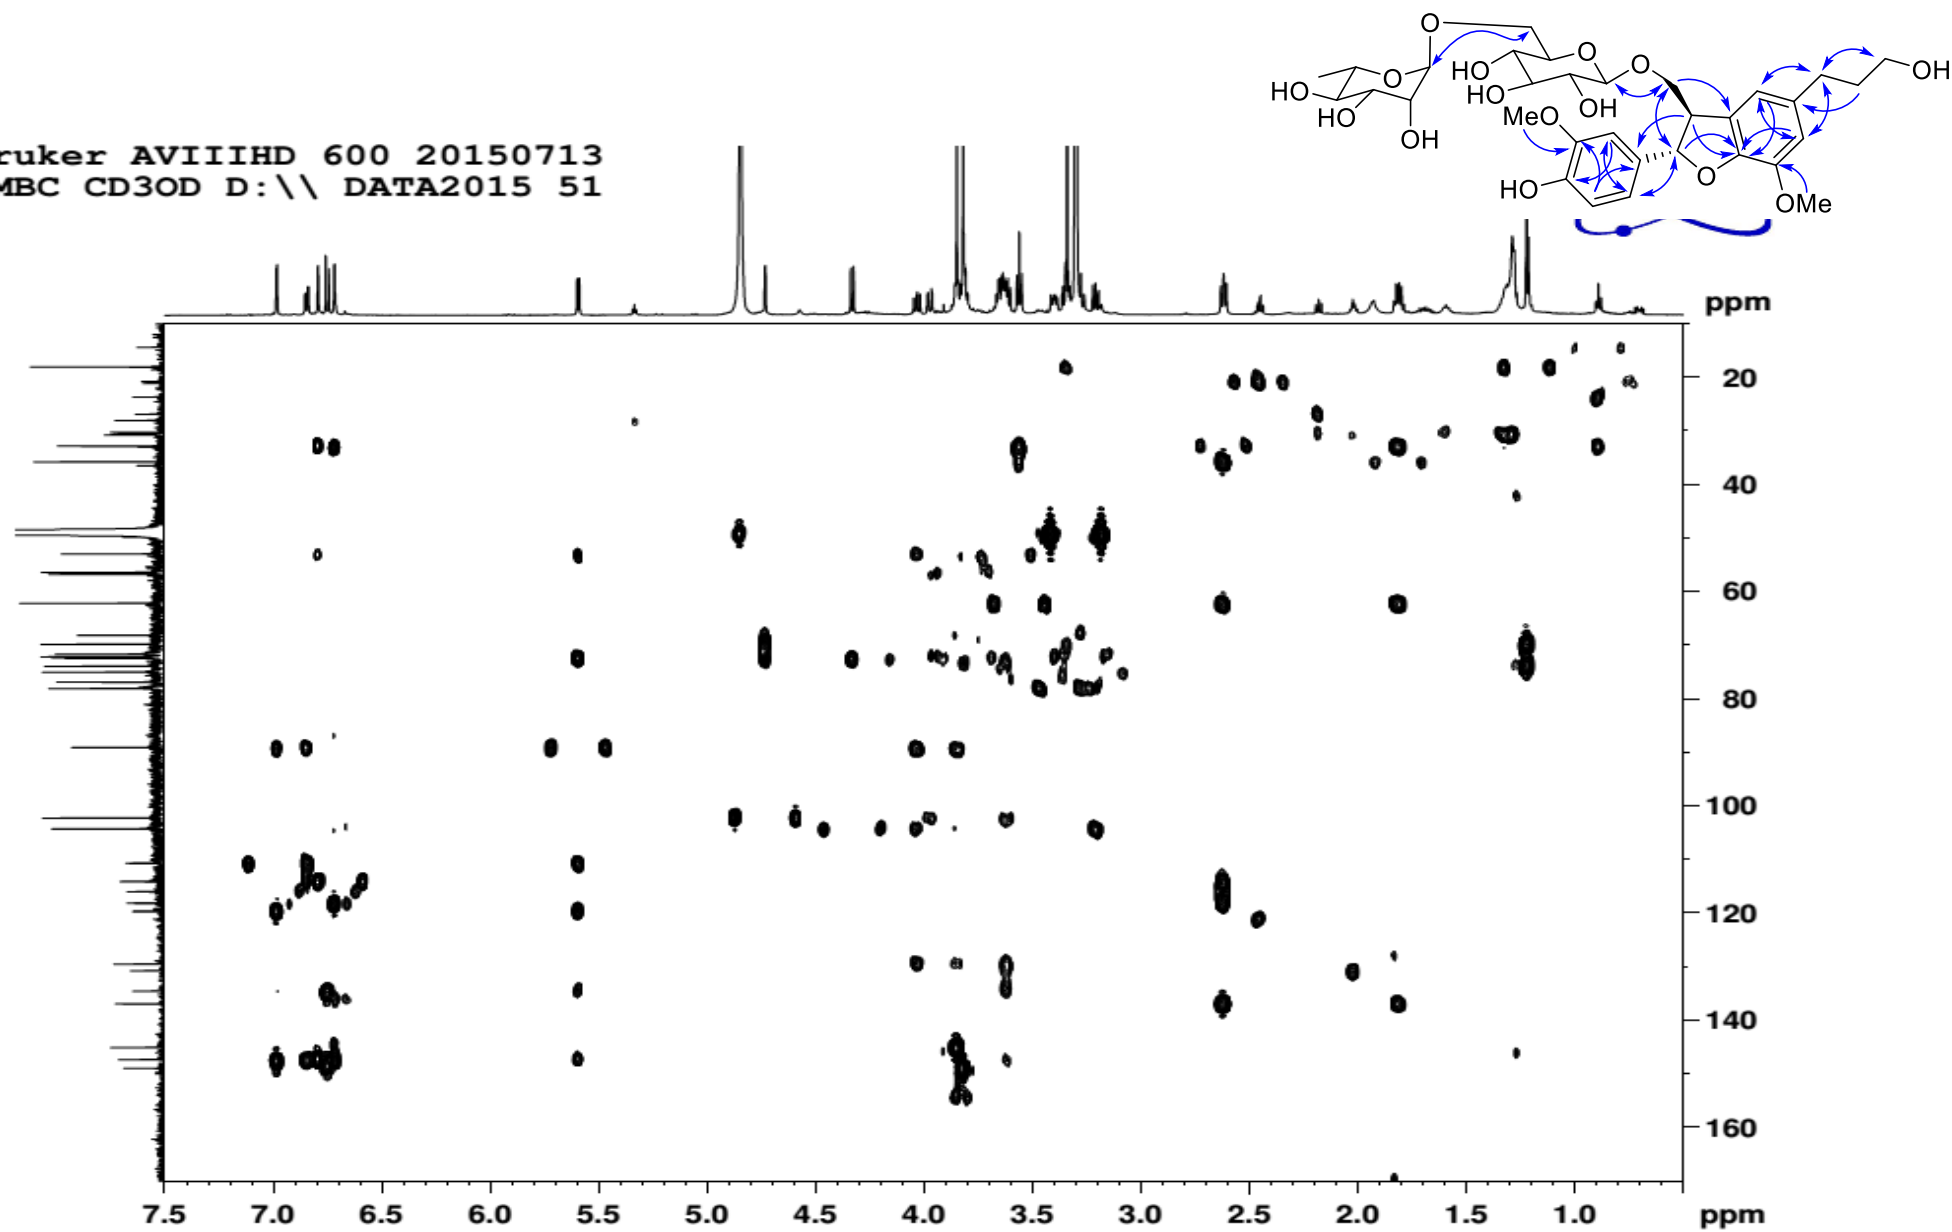

Figure S81. The HMBC Spectrum of Compound 7 in MeOH-*d*<sub>4</sub> (600MHz)

Bruker AVIIIHD 600 20151019  
NOESY\_2D CD3OD D:\ DATA2015 56

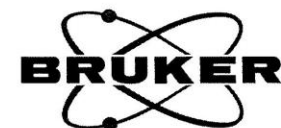

Current Data Parameters  
NAME 20151019 sjj-wlll  
EXPNO 2  
PROCNO 1

F2 - Acquisition Parameters  
Date\_ 20151025  
Time 23.45  
INSTRUM spect  
PROBHD 5 mm CPDCH 13C  
PULPROG noesygpph  
TD 2048  
SOLVENT CD3OD  
NS 16  
DS 16  
SWH 8417.509 Hz  
FIDRES 4.110112 Hz  
AQ 0.1216512 sec  
RG 144  
DW 59.400 usec  
DE 20.00 usec  
TE 298.0 K  
D0 0.0000476 sec  
D1 1.20000005 sec  
D8 0.60000002 sec  
D11 0.03000000 sec  
D12 0.00002000 sec  
D16 0.00020000 sec  
IN0 0.00011880 sec

===== CHANNEL f1 =====  
SF01 600.2539016 MHz  
NUC1 1H  
P1 11.50 usec  
P2 23.00 usec  
P17 2500.00 usec  
PLW1 12.93200016 W  
PLW10 2.52999997 W

===== GRADIENT CHANNEL =====  
GPNAM[1] SMSQ10.100  
GPZ1 40.00 %  
F16 1000.00 usec

F1 - Acquisition parameters  
TD 160  
SFO 600.2539016 MHz

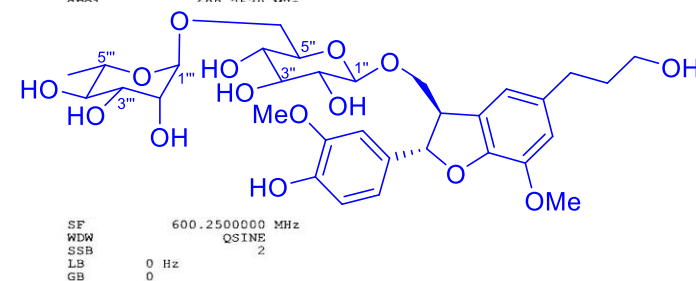

Figure S82. The NOESY Spectrum of Compound 7 in MeOH- $d_4$  (600MHz)

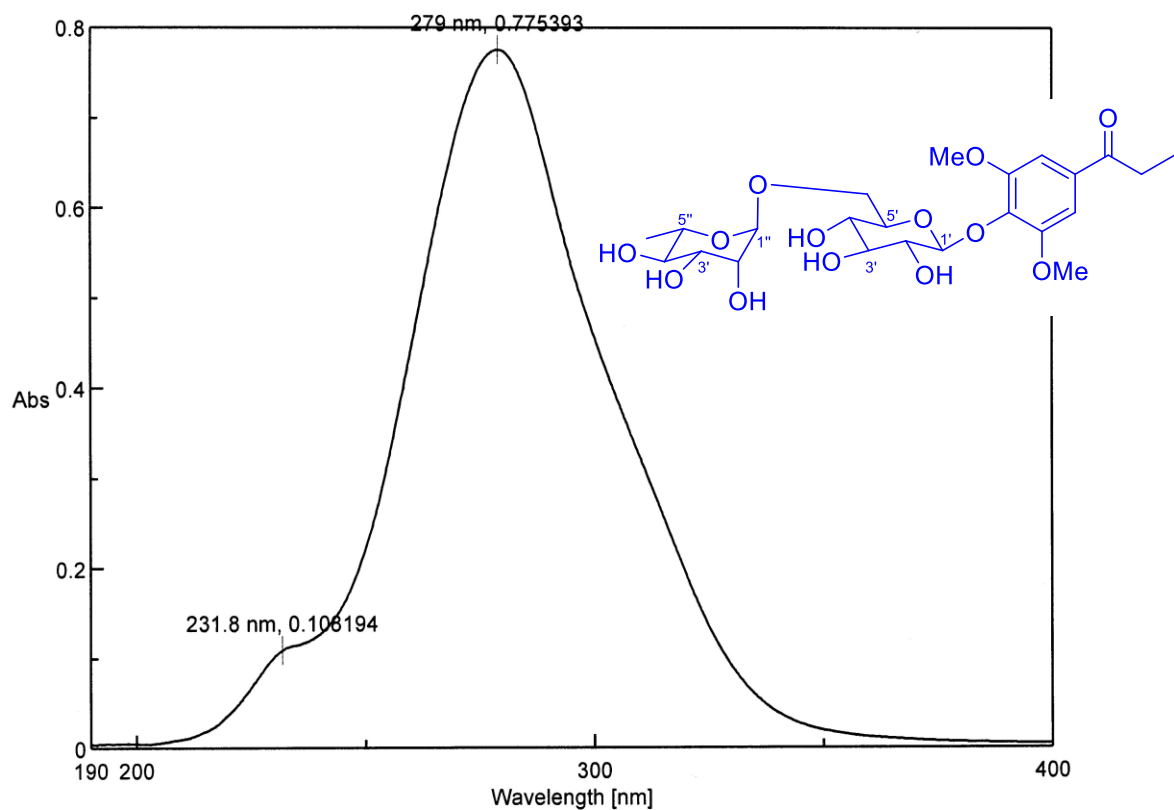

[Comment]  
 Sample Name DBT  
 Comment 0.02  
 User  
 Division UV  
 Company 324  
 [Measurement Information]  
 Instrument Name V-650  
 Model Name V-650  
 Serial No. A034461150

Accessory PSC-718  
 Accessory S/N A001761114  
 Position 1  
 Cell Length 10 mm  
 Temperature 19.96 C  
 Control Sensor Holder  
 Monitor Sensor Holder  
 Start Mode Start immediately

Photometric Mode Abs  
 Measurement range 400 - 190 nm  
 Data pitch 0.2 nm  
 Band width(UV/Vis) 2.0 nm  
 Response Medium  
 Scanning speed 200 nm/min  
 Source Change 340 nm  
 Light Source D2/M  
 Filter Exchange Step  
 Correction Baseline

[Data Information]  
 Creation Date 2015-6-30 19:15  
 Data array type Linear data array  
 Horizontal Wavelength [nm]  
 Vertical Abs  
 Start 400 nm  
 End 190 nm  
 Data pitch 0.2 nm  
 Data points 1051

**Figure S83. The UV Spectrum of Compound 8 in MeOH**

# Compound Mass Spectrum Report - MS

**Analysis Name:** 20150416-13.d  
**Method:** linsheng.m  
**Sample Name:** SJJ-w83  
**Analysis Info:**

**Instrument:** LC-MSD-Trap-SL  
**Operator:** Operator

**Print Date:** 2015-6-8 12:16:50  
**Acq. Date:** 2015-4-16 22:48:10

## Acquisition Parameter:

Mass Range Mode Std/Normal  
Ion Polarity Positive  
Ion Source Type ESI  
Dry Temp (Set) 330 度  
Nebulizer (Set) 15.00 psi  
Dry Gas (Set) 6.00 l/min

Trap Drive 60.4  
Skim 1 -40.0 Volt  
Skim 2 5.0 Volt  
Octopole RF Amplitude 187.1 Vpp  
Capillary Exit -128.5 Volt

Scan Begin 100 m/z  
Scan End 1000 m/z  
Averages 7 Spectra  
Max. Accu Time 200000 秒  
ICC Target 30000  
Charge Control on

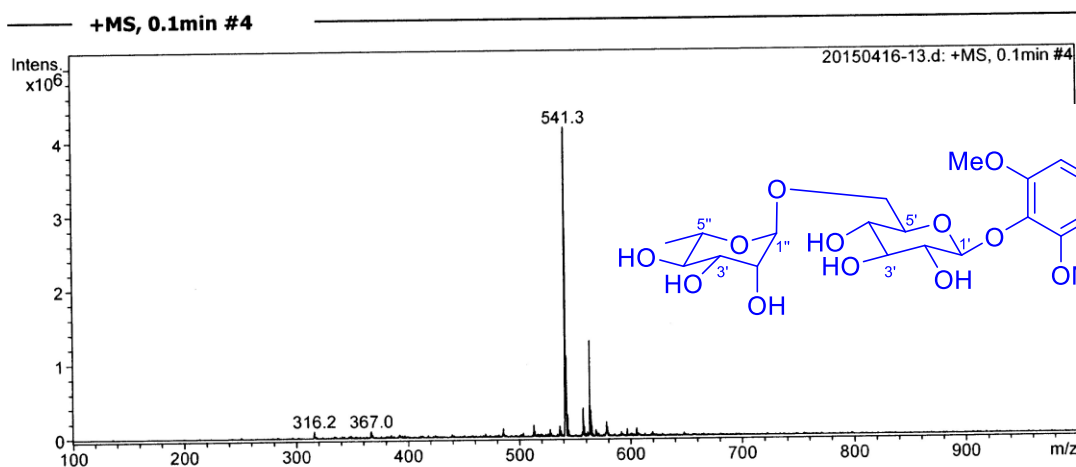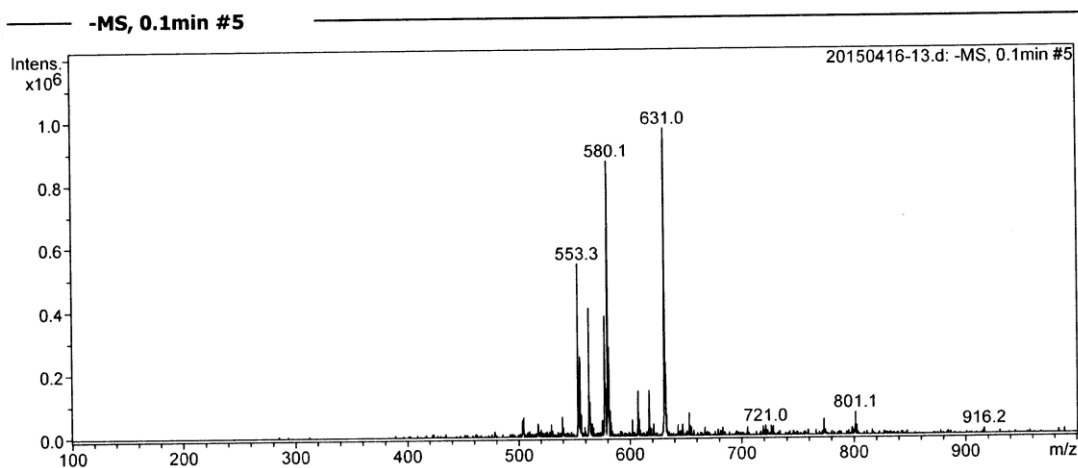

**Figure S84. The ESIMS Spectrum of Compound 8**

日期:2015-06-17  
仪器:API-TOFMS 10000 广州禾信分析仪器有限公司  
时间:从0.2900到0.5060

用户单位名称:中国医学科学院药物研究所  
样品名称:sjj-w83  
离子模式:Positive

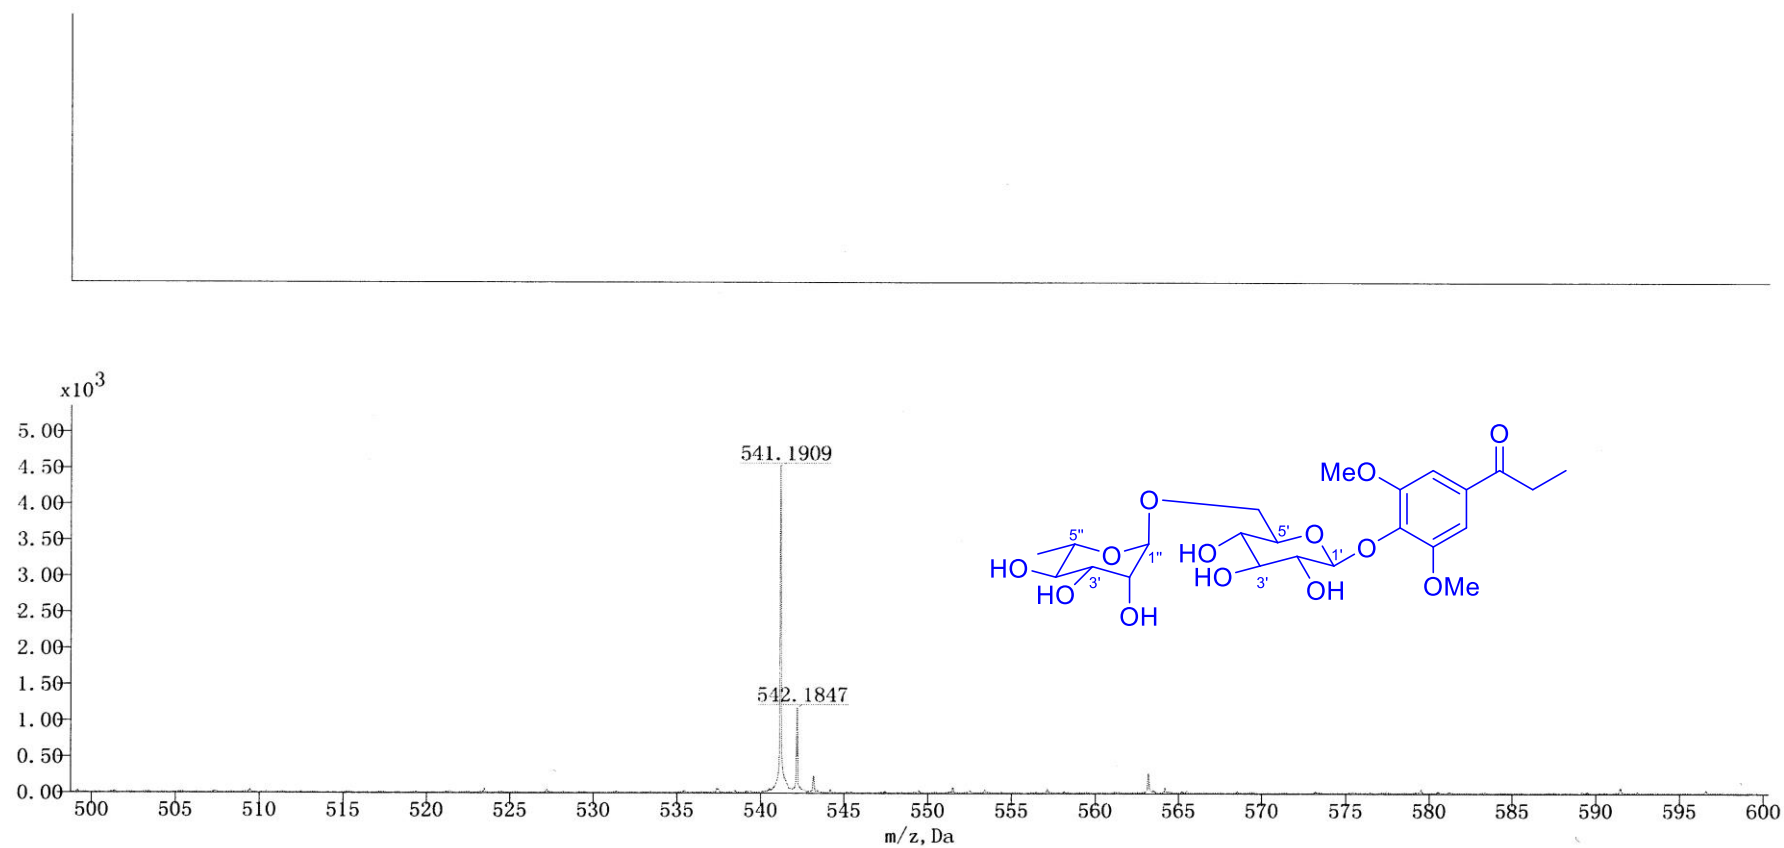

**Figure S85. The HRESIMS Spectrum of Compound 8**

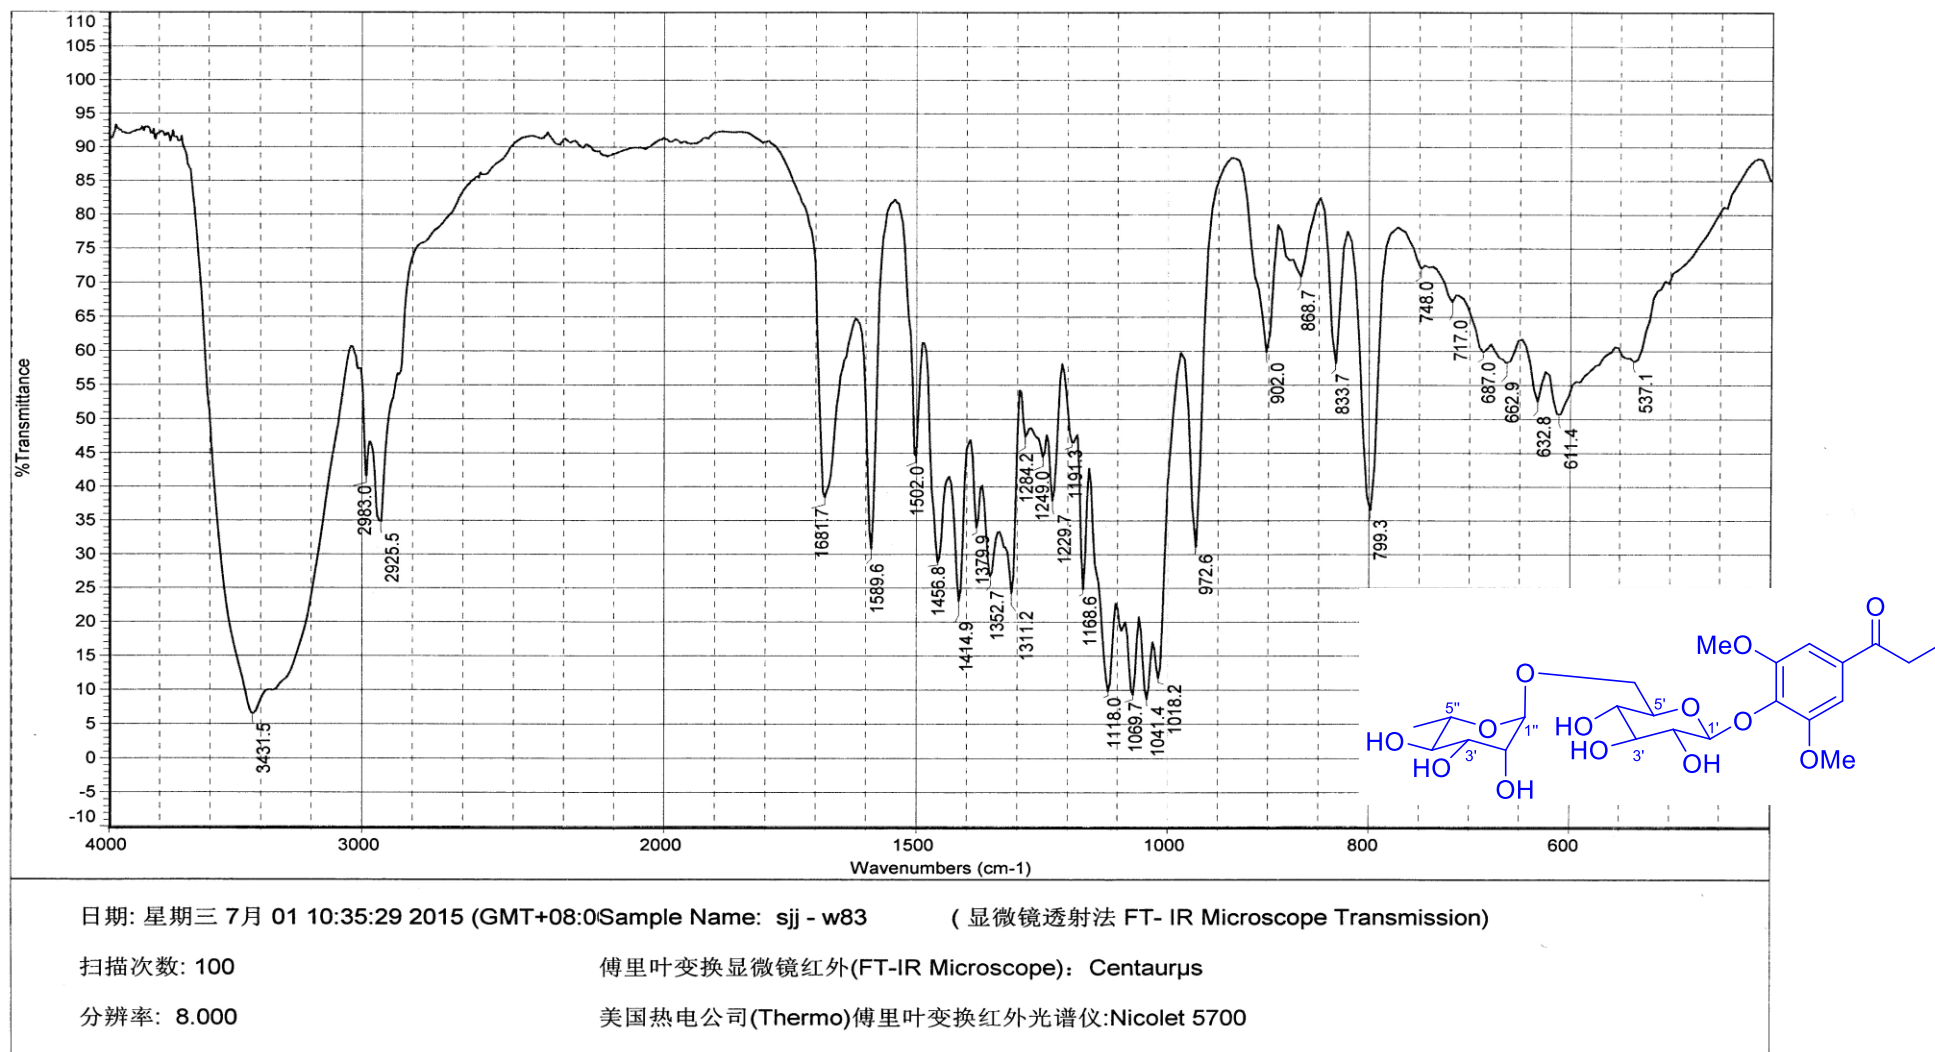

**Figure S86. The IR Spectrum of Compound 8**

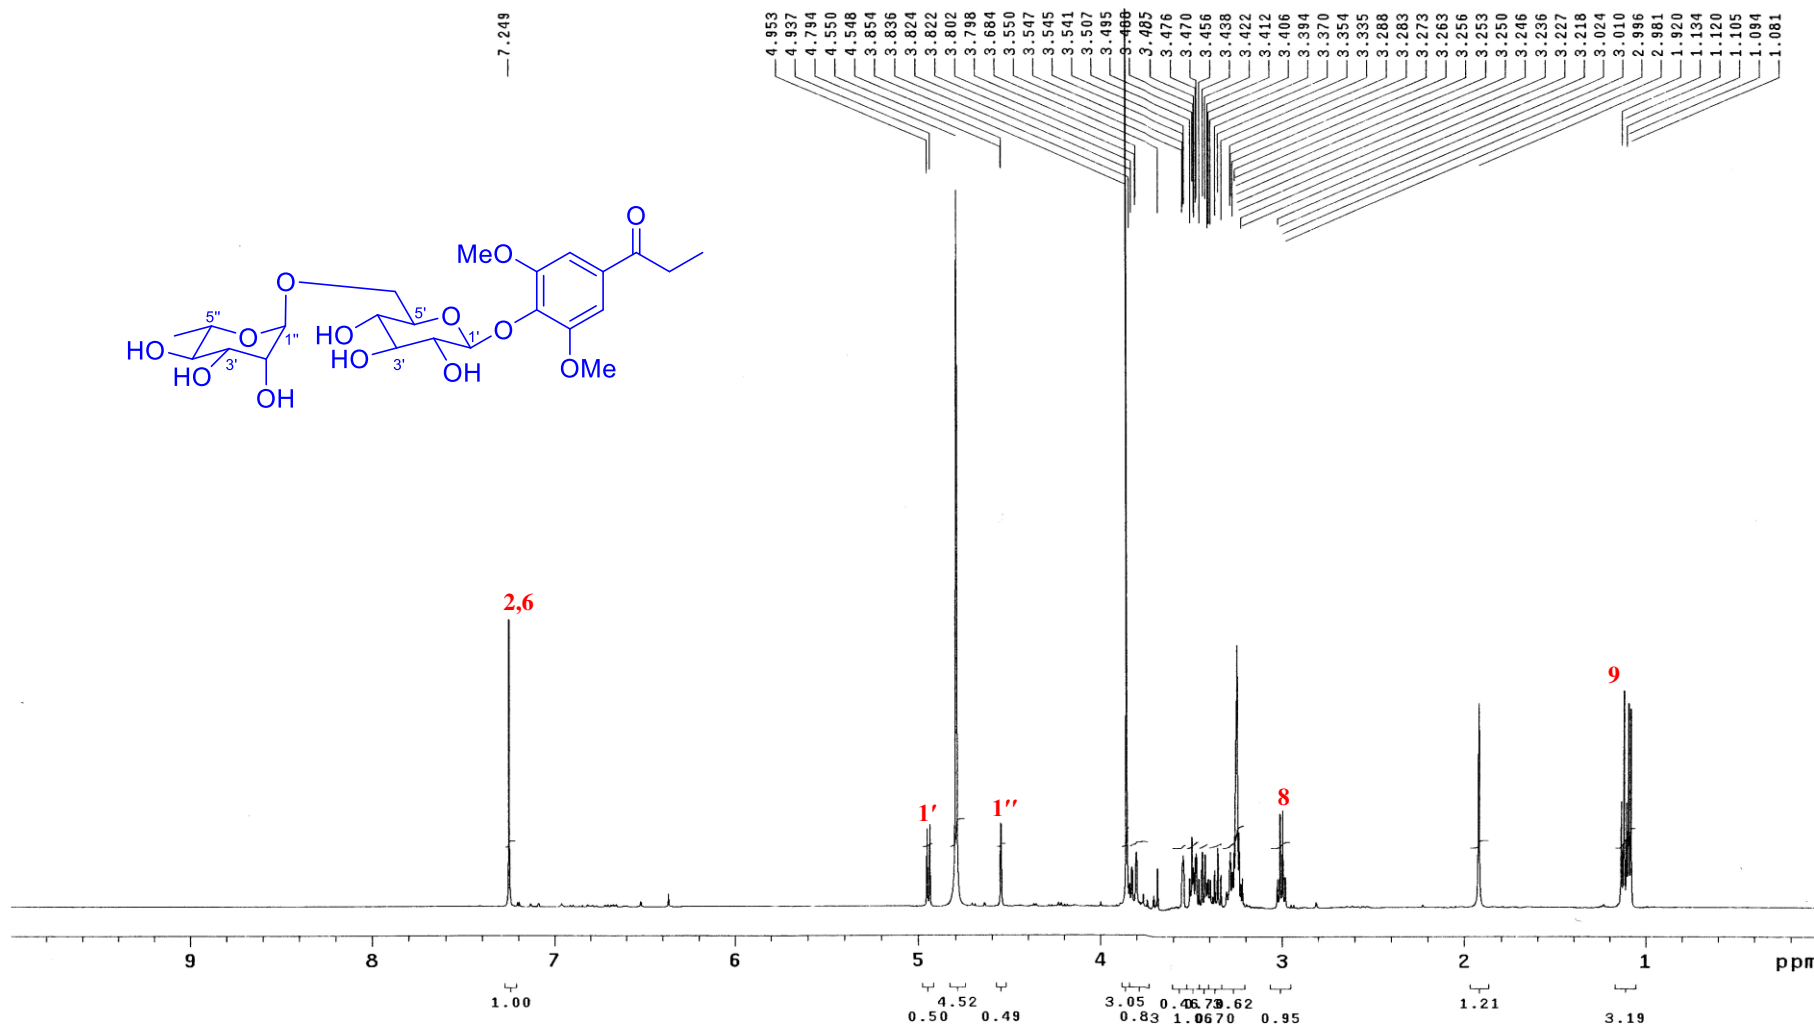

Figure S87. The  $^1\text{H}$  NMR Spectrum of Compound 8 in  $\text{MeOH-}d_4$  (500MHz)

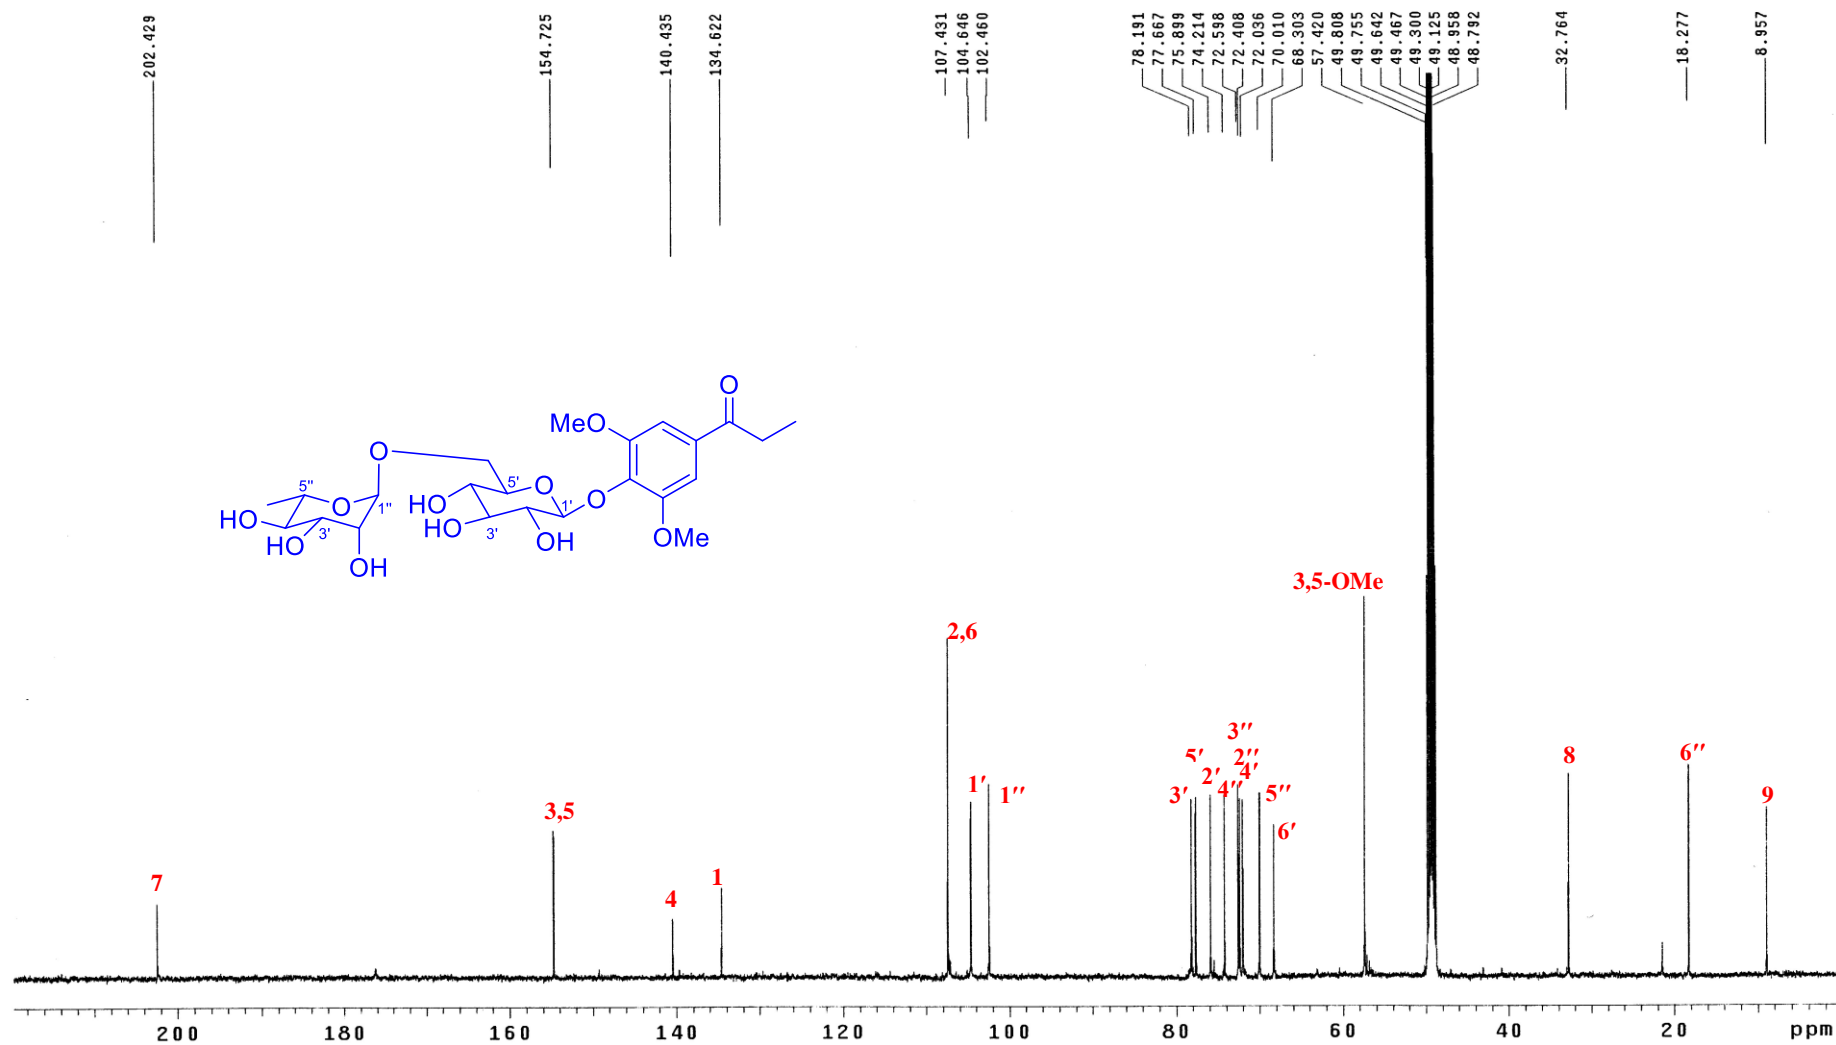

Figure S88. The  $^{13}\text{C}$  NMR Spectrum of Compound 8 in  $\text{MeOH-}d_4$  (125MHz)

DD2-500 gCOSY sjj-w83 IN cd3od Jan 23 2015 coldprobe

Temp. 25.0 C / 298.1 K  
 Sample #8, Operator: vnmr1  
 Relax. delay 1.000 sec  
 Acq. time 0.150 sec  
 Width 4664.2 Hz  
 2D Width 4664.2 Hz  
 4 repetitions  
 128 increments  
 OBSERVE H1, 499.7694110 MHz  
 DATA PROCESSING  
 Sq. sine bell 0.075 sec  
 F1 DATA PROCESSING  
 Sq. sine bell 0.027 sec  
 FT size 2048 x 2048  
 Total time 10 min

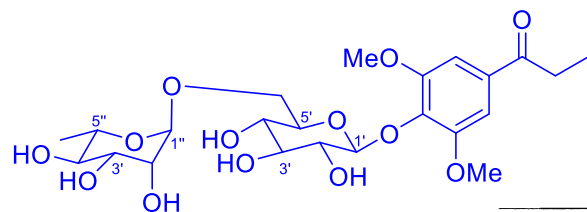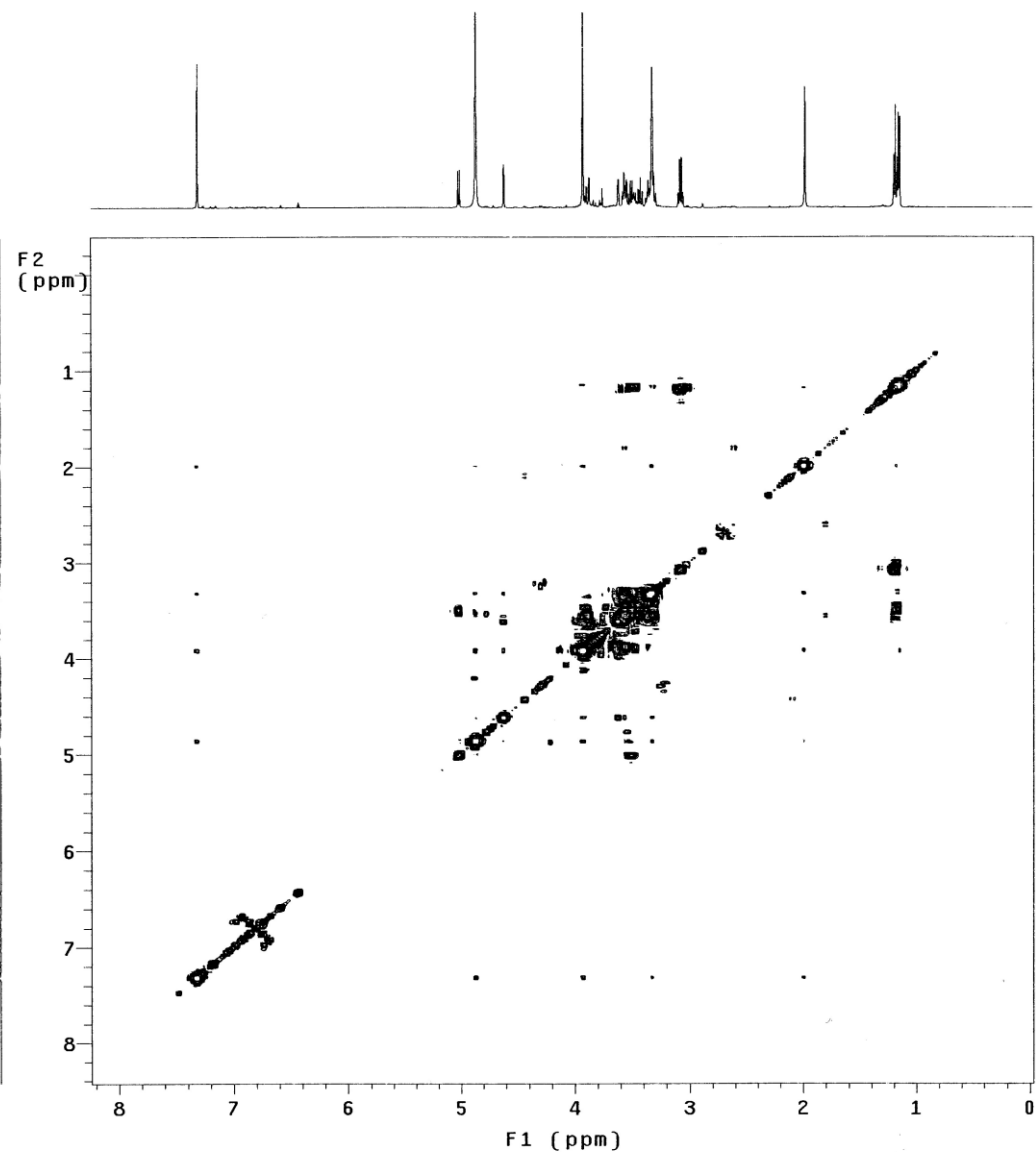

**Figure S89. The  $^1\text{H}$ - $^1\text{H}$  COSY Spectrum of Compound 8 in  $\text{MeOH-}d_4$  (500MHz)**

DD2-500 gHSQCAD sjj-w83 IN cd3od Jan 23 2015 coldprobe

Temp. 25.0 C / 298.1 K  
Sample #8, Operator: vnmr1

Relax. delay 1.000 sec  
Acq. time 0.258 sec  
Width 4664.2 Hz  
2D Width 25133.5 Hz  
8 repetitions  
2 x 128 increments  
OBSERVE H1, 499.7694110 MHz  
DECOUPLE C13, 125.6784284 MHz  
Power 38 dB  
on during acquisition  
off during delay  
W40\_coldprobe modulated  
DATA PROCESSING  
Gauss apodization 0.069 sec  
F1 DATA PROCESSING  
Gauss apodization 0.005 sec  
FT size 4096 x 2048  
Total time 41 min

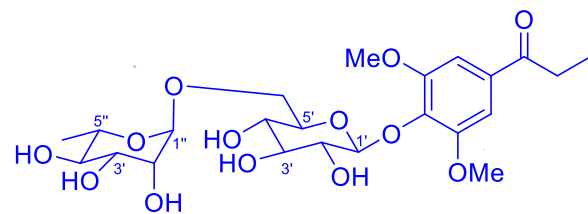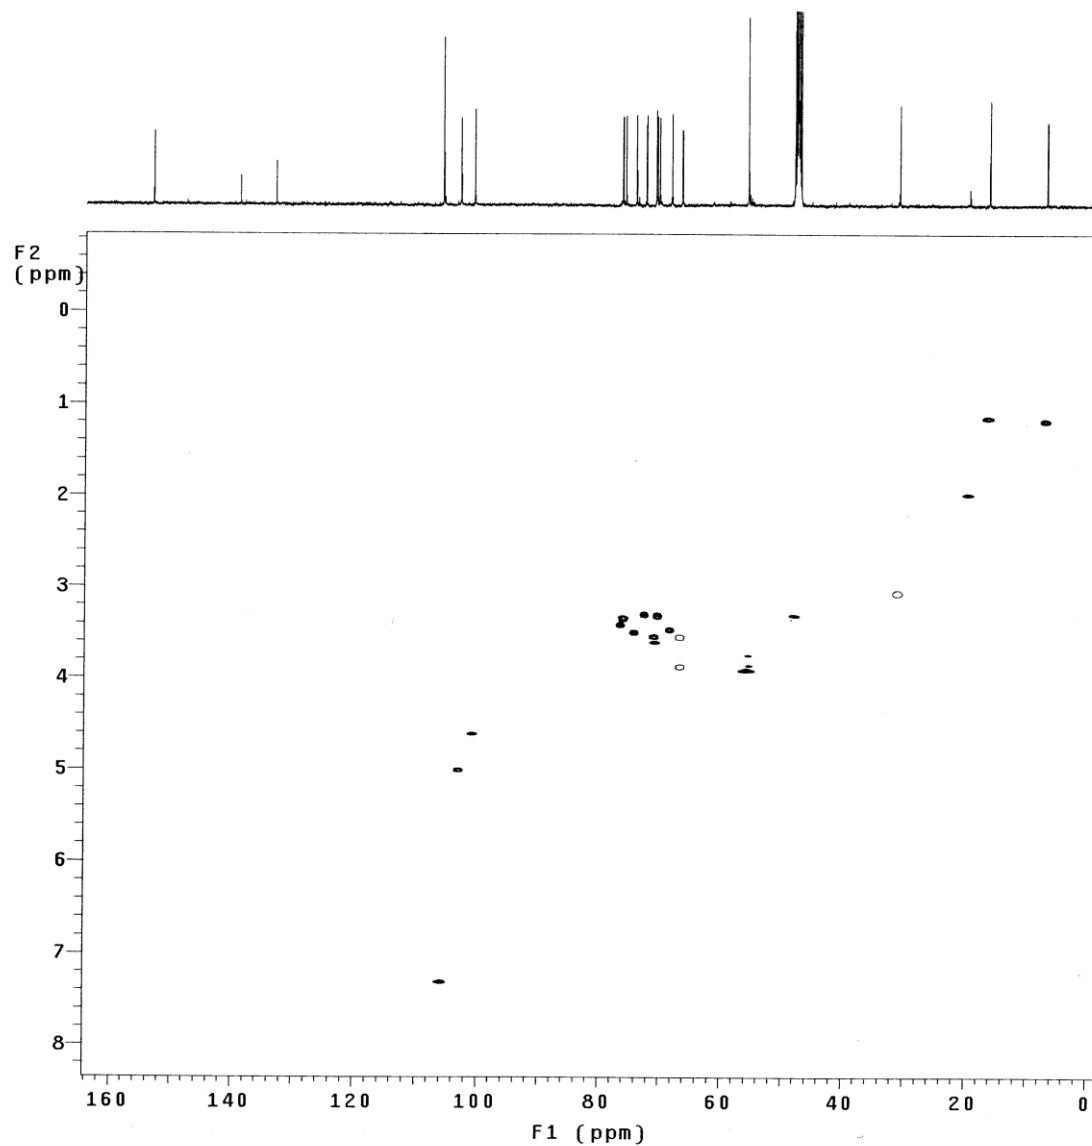

Figure S90. The HSQC Spectrum of Compound 8 in MeOH-*d*<sub>4</sub> (500MHz)

DD2-500 gHMBCAD sjj-w83 IN cd3od Jan 23 2015 coldprobe

Temp. 25.0 C / 298.1 K  
Sample #8, Operator: vnmr1  
Relax. delay 1.000 sec  
Acq. time 0.258 sec  
Width 4664.2 Hz  
2D Width 30154.5 Hz  
16 repetitions  
2 x 128 increments  
OBSERVE H1, 499.7694110 MHz  
DATA PROCESSING  
Sq. sine bell 0.075 sec  
F1 DATA PROCESSING  
Gauss apodization 0.004 sec  
FT size 4096 x 2048  
Total time 1 hr, 24 min

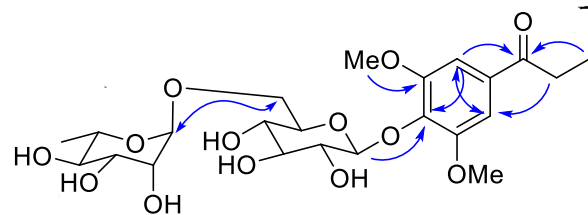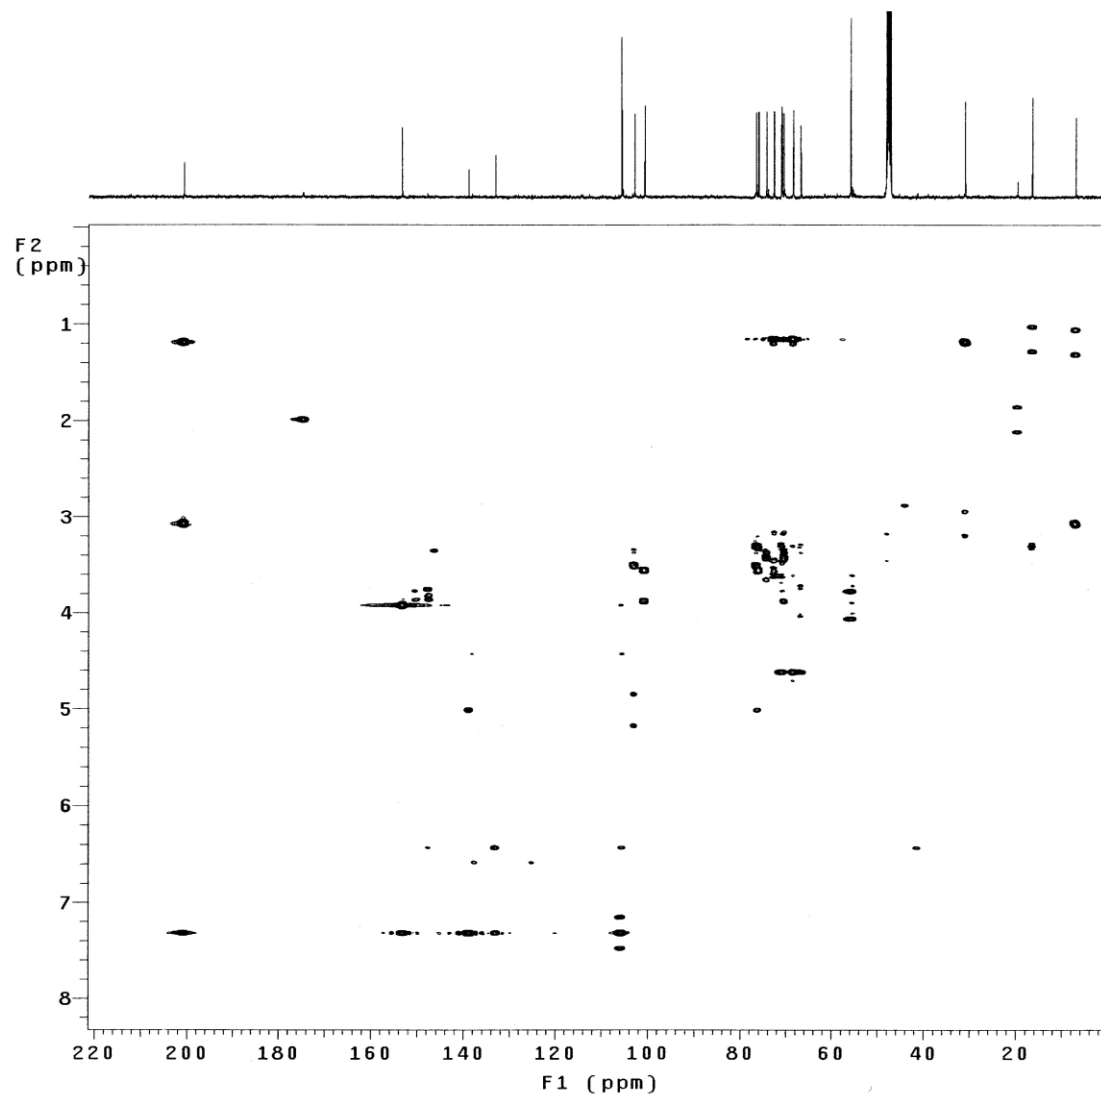

**Figure S91. The HMBC Spectrum of Compound 8 in MeOH- $d_4$  (500MHz)**

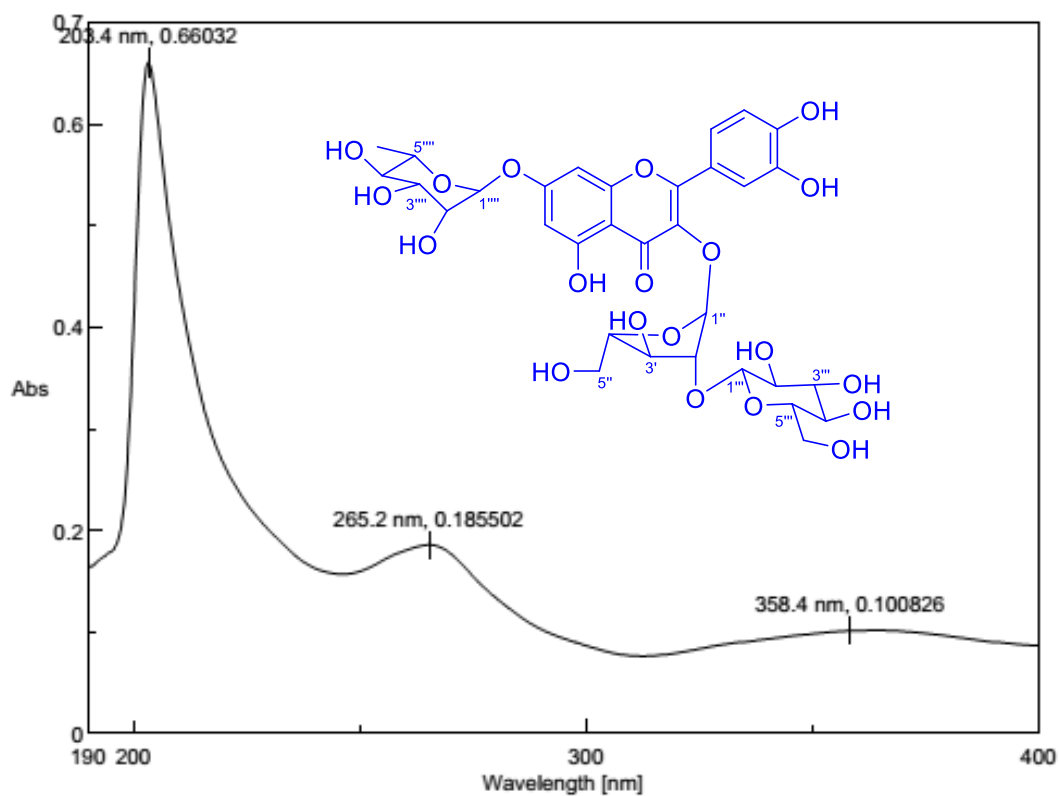

[Comment]  
 Sample Name DBT  
 Comment 0.02  
 User  
 Division UV  
 Company 324  
 [Measurement Information]  
 Instrument Name V-650  
 Model Name V-650  
 Serial No. A034461150

Accessory PSC-718  
 Accessory S/N A001761114  
 Position 1  
 Cell Length 10 mm  
 Temperature 19.99 C  
 Control Sensor Holder  
 Monitor Sensor Holder  
 Start Mode Start immediately

Photometric Mode Abs  
 Measurement range 400 - 190 nm  
 Data pitch 0.2 nm  
 Band width(UV/Vis) 2.0 nm  
 Response Medium  
 Scanning speed 200 nm/min  
 Source Change 340 nm  
 Light Source D2/WI  
 Filter Exchange Step  
 Correction Baseline

[Data Information]  
 Creation Date 2016-5-10 19:38  
 Data array type Linear data array  
 Horizontal Wavelength [nm]  
 Vertical Abs  
 Start 400 nm  
 End 190 nm  
 Data pitch 0.2 nm  
 Data points 1051

—— SJJ-W96

**Figure S92. The UV Spectrum of Compound 9 in MeOH**

# Compound Mass Spectrum Report - MS

**Analysis Name:** 20150605-2.d

**Instrument:** LC-MSD-Trap-SL

**Print Date:** 2015-6-5 13:27:01

**Method:** linsheng.m

**Operator:** Operator

**Acq. Date:** 2014-5-22 9:23:38

**Sample Name:** SJJ-w96

**Analysis Info:**

## Acquisition Parameter:

|                 |            |                       |             |                |           |
|-----------------|------------|-----------------------|-------------|----------------|-----------|
| Mass Range Mode | Std/Normal | Trap Drive            | 82.8        | Scan Begin     | 100 m/z   |
| Ion Polarity    | Positive   | Skim 1                | -40.0 Volt  | Scan End       | 1000 m/z  |
| Ion Source Type | ESI        | Skim 2                | 5.0 Volt    | Averages       | 7 Spectra |
| Dry Temp (Set)  | 330 度      | Octopole RF Amplitude | 200.0 Vpp   | Max. Accu Time | 200000 秒  |
| Nebulizer (Set) | 15.00 psi  | Capillary Exit        | -151.0 Volt | ICC Target     | 10000     |
| Dry Gas (Set)   | 6.00 l/min |                       |             | Charge Control | on        |

## +MS, 0.1min #4

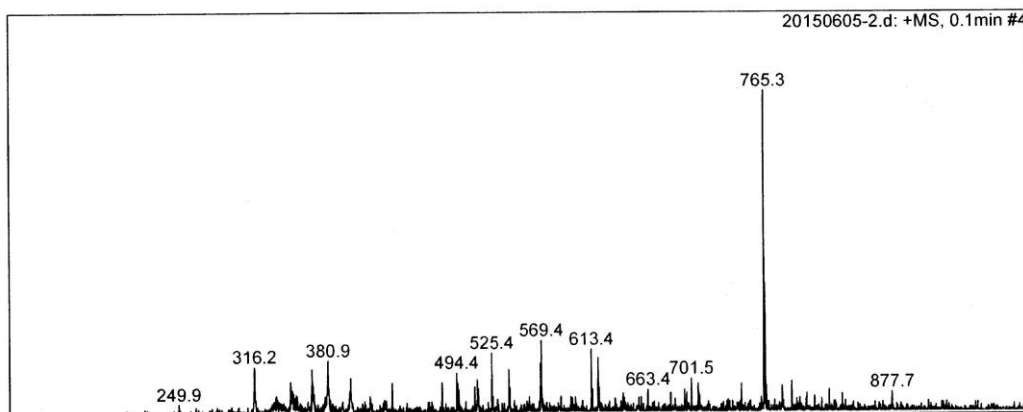

## -MS, 0.3min #11

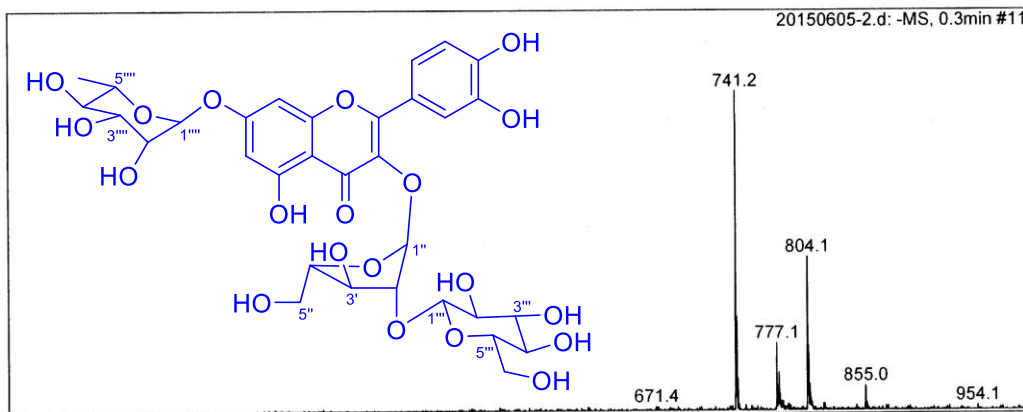

**Figure S93. The ESIMS Spectrum of Compound 9**

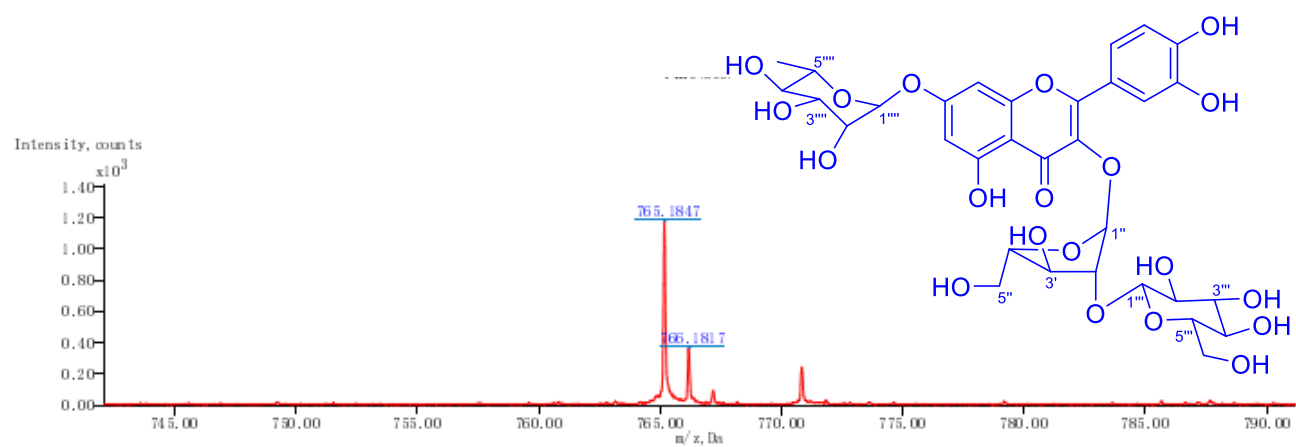

**Figure S94. The HRESIMS Spectrum of Compound 9**

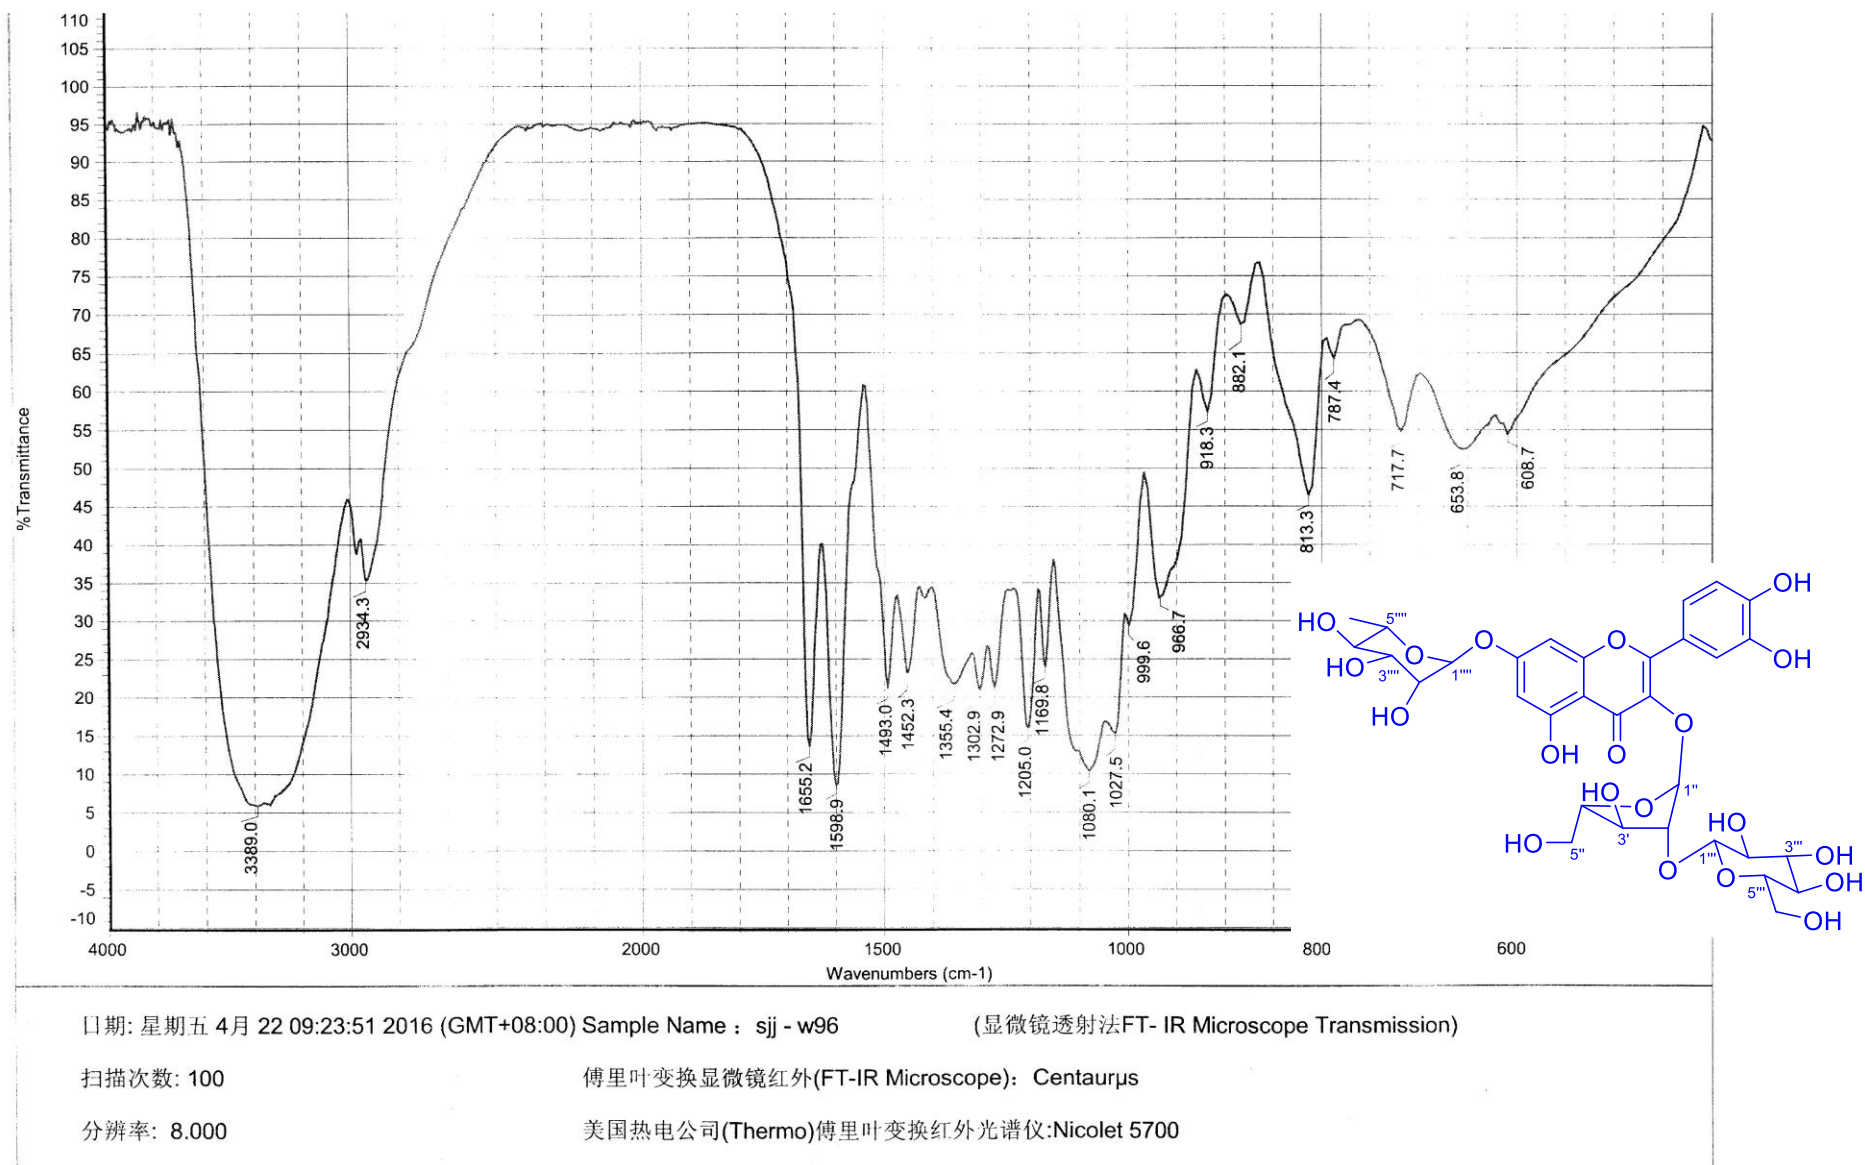

**Figure S95. The IR Spectrum of Compound 9**

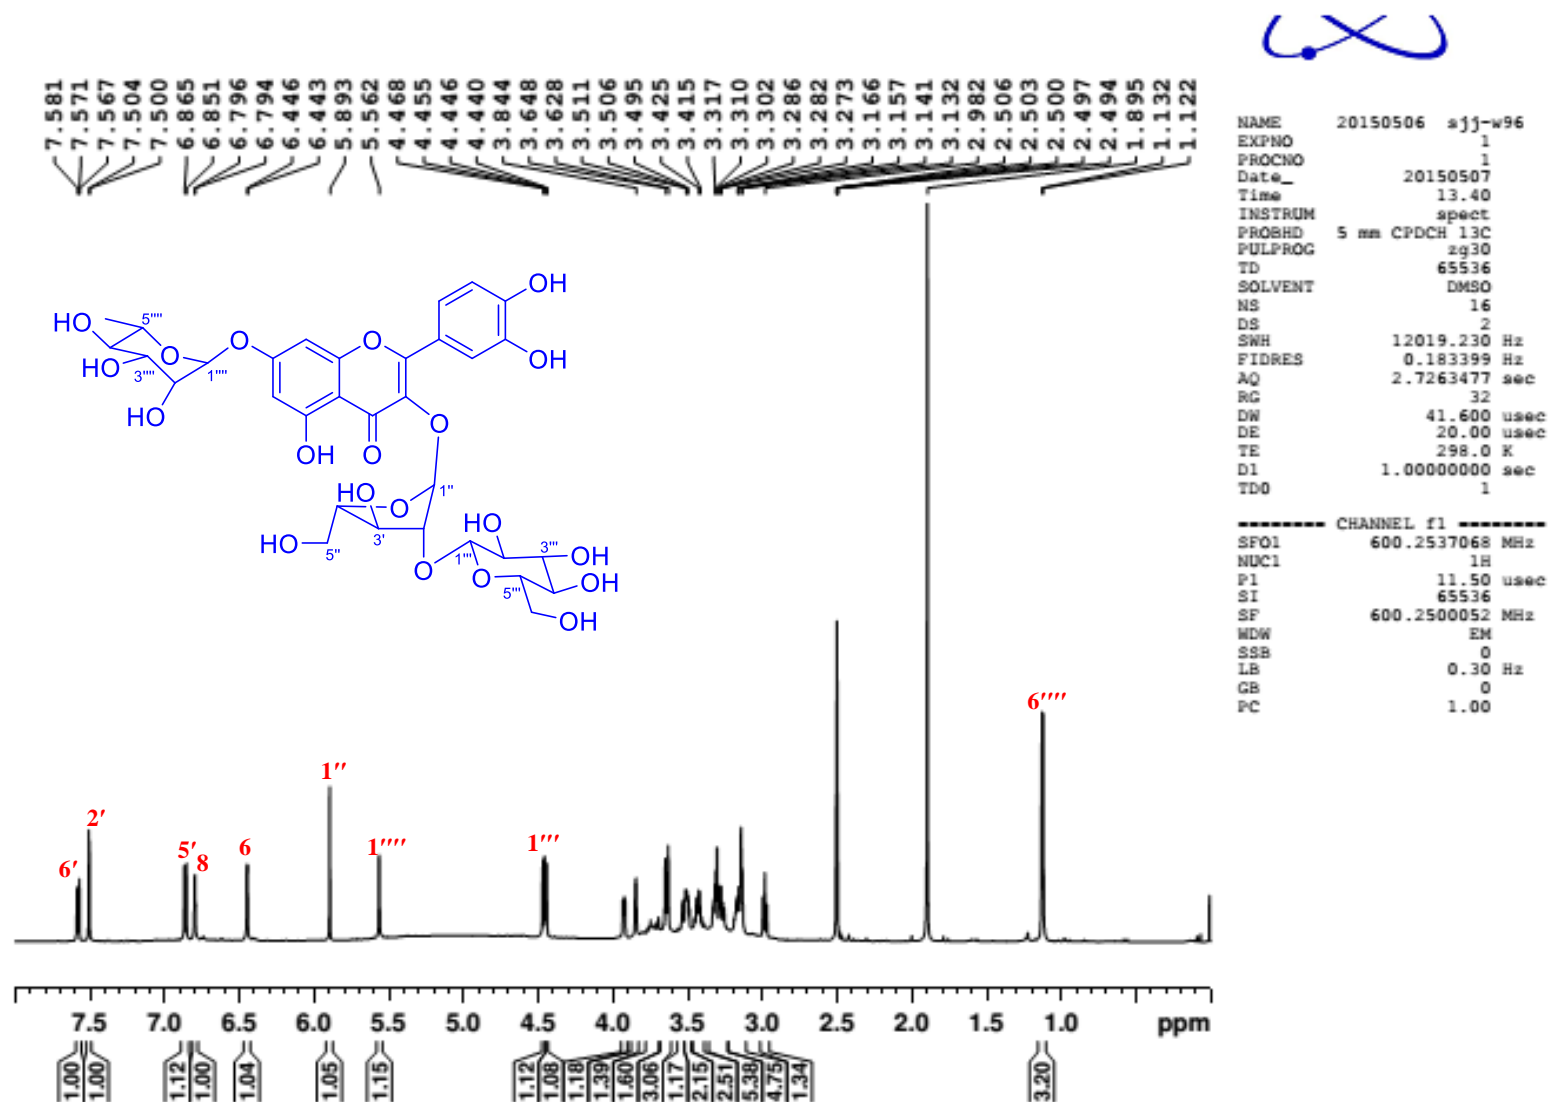

Figure S96. The  $^1\text{H}$  NMR Spectrum of Compound 9 in  $\text{MeOH-}d_4$  (600MHz)



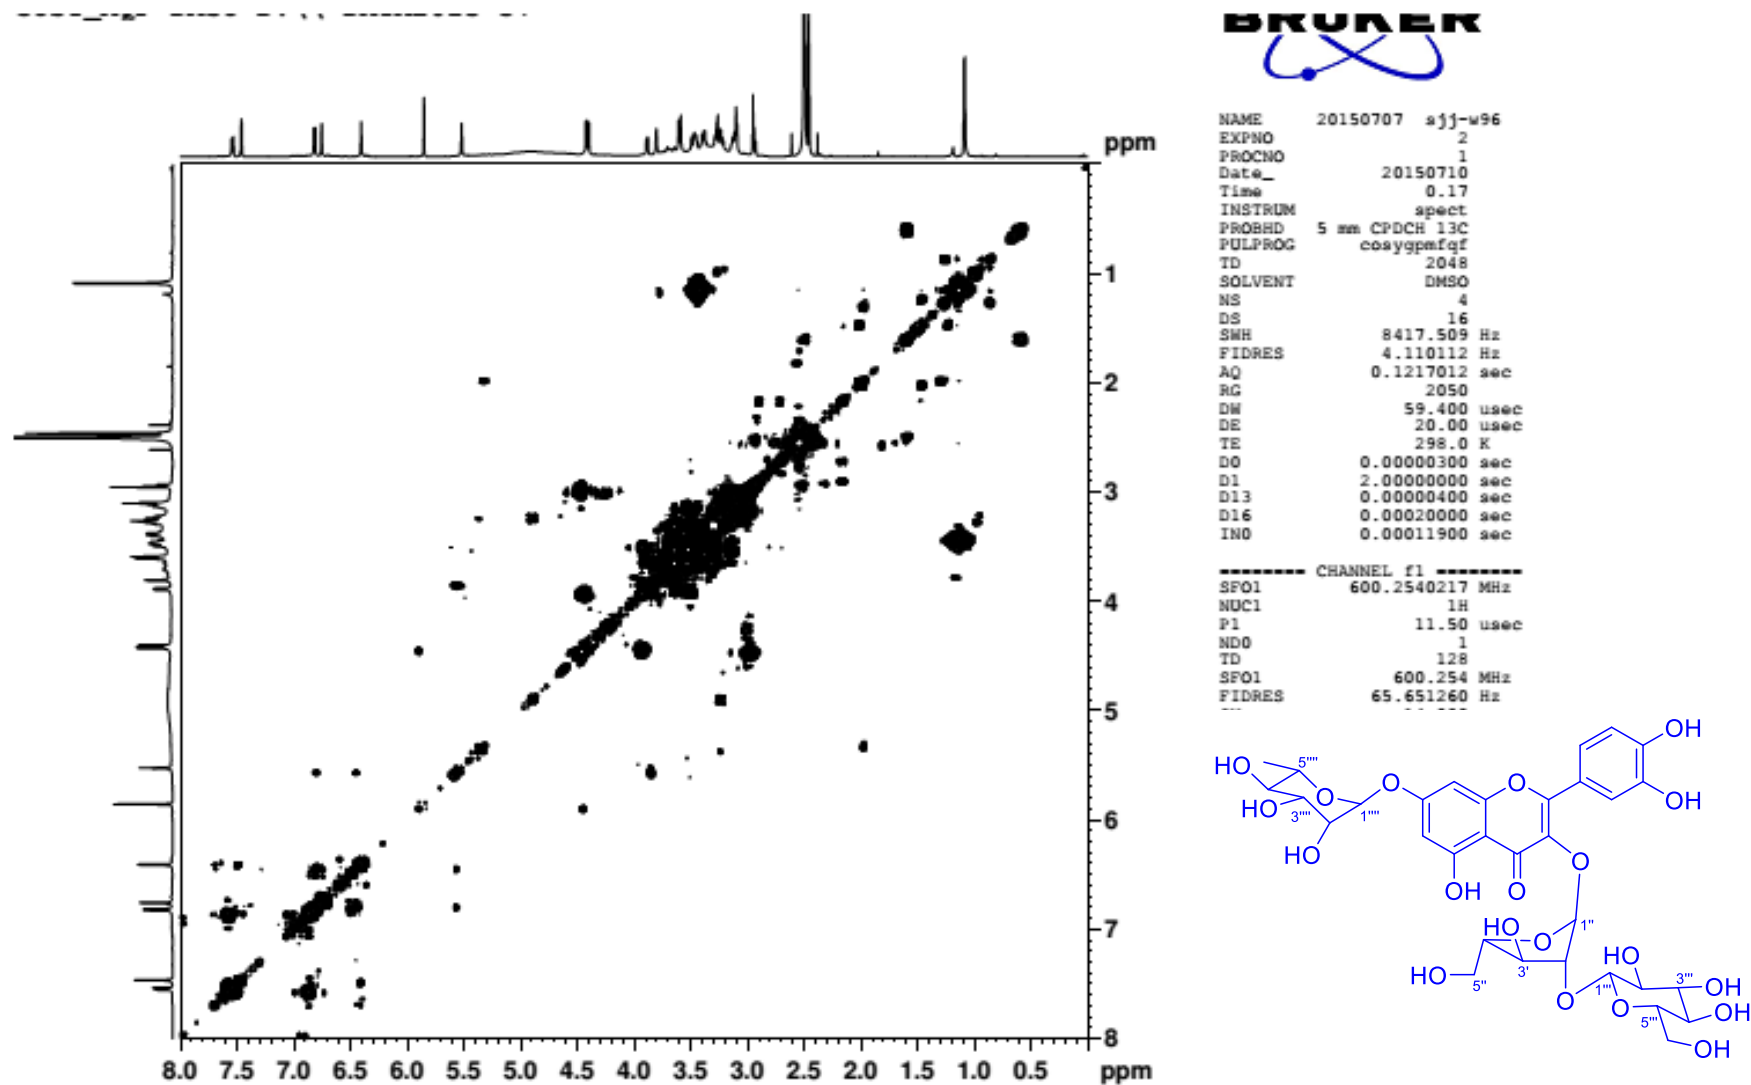

Figure S98. The  $^1\text{H}$ - $^1\text{H}$  COSY Spectrum of Compound 9 in  $\text{MeOH-}d_4$  (600MHz)

Bruker AVIIIHD 600 20150707  
HSQC DMSO D:\ DATA2015 57

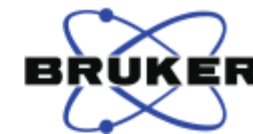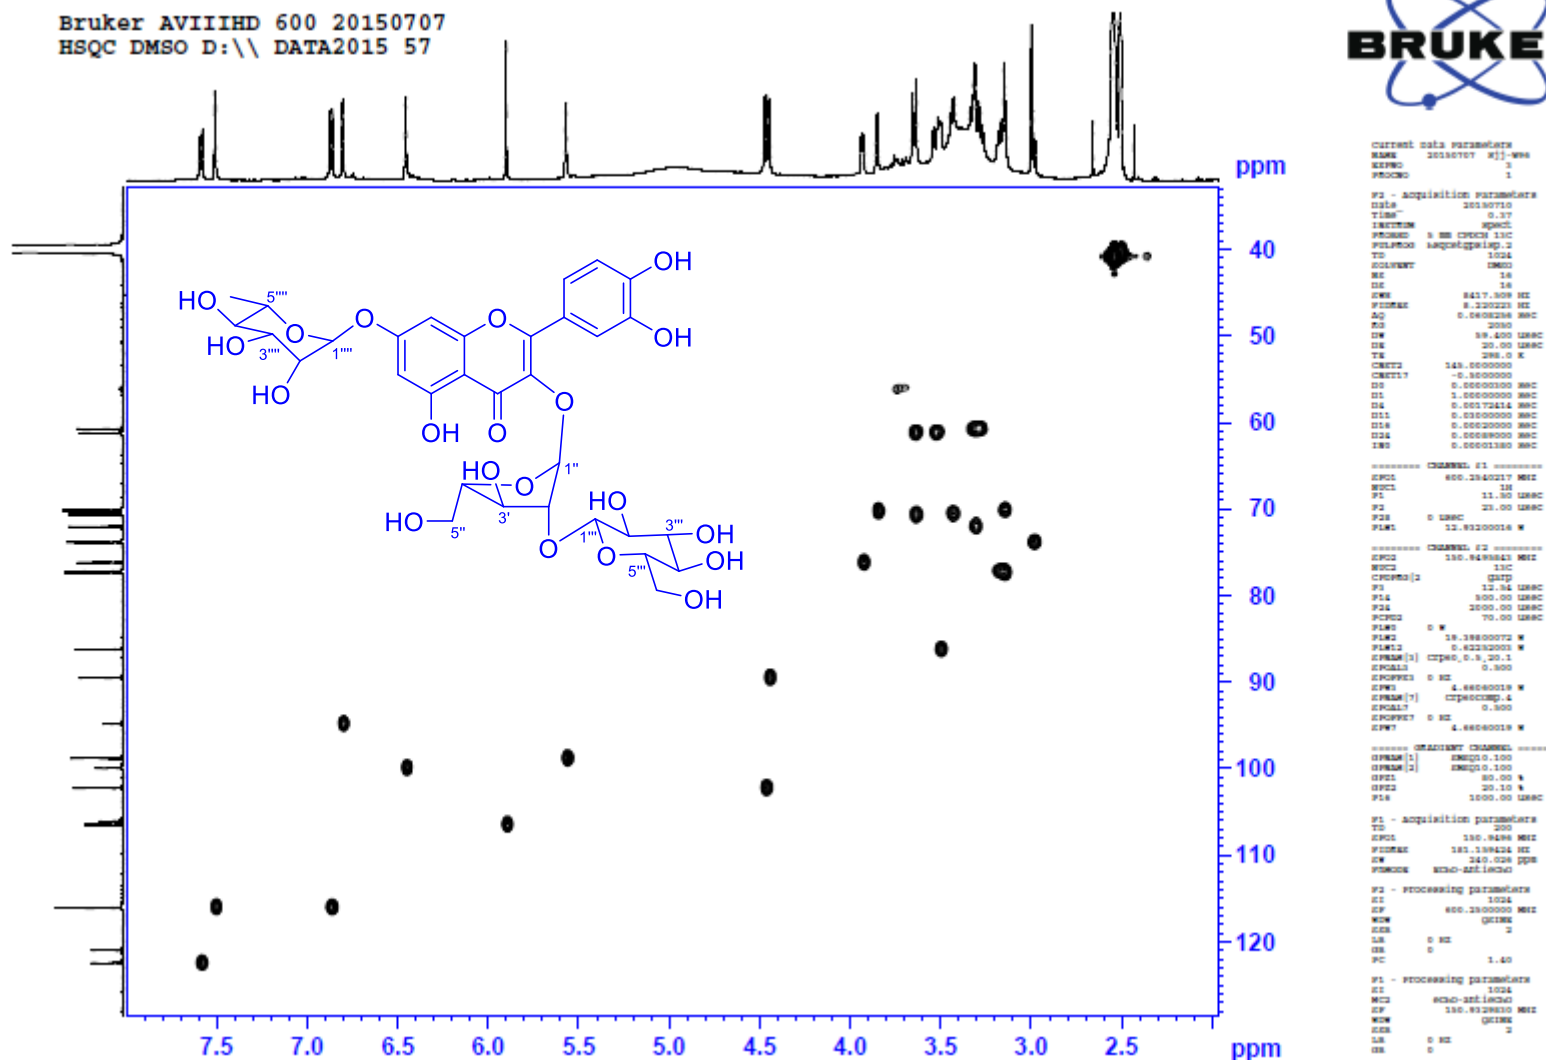

Figure S99. The HSQC Spectrum of Compound 9 in MeOH-*d*<sub>4</sub> (600MHz)

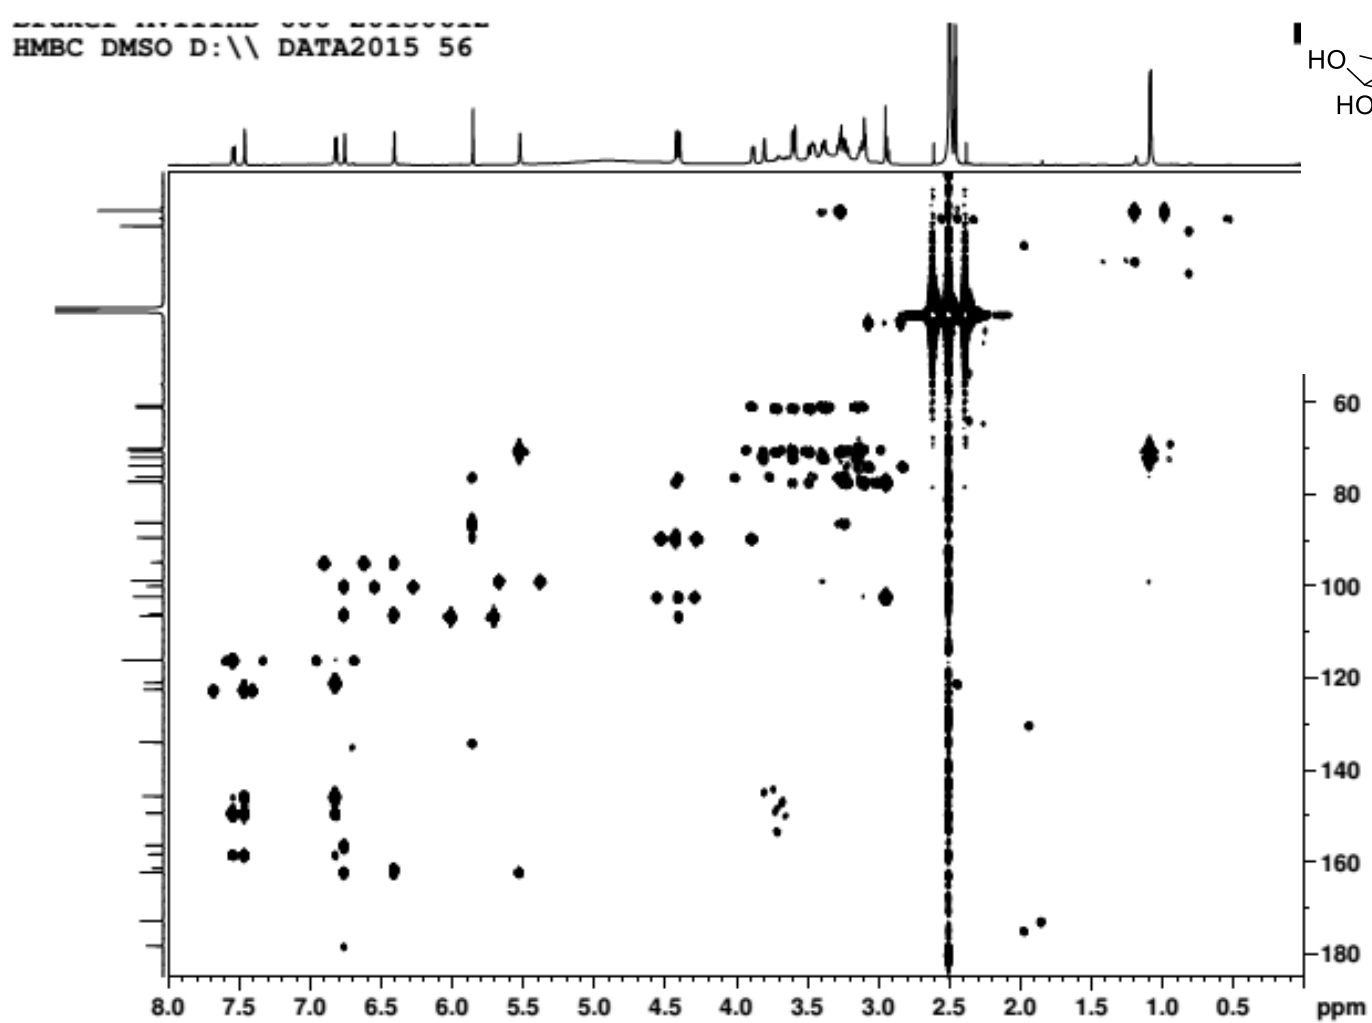

Figure S100. The HMBC Spectrum of Compound 9 in MeOH- $d_4$  (600MHz)

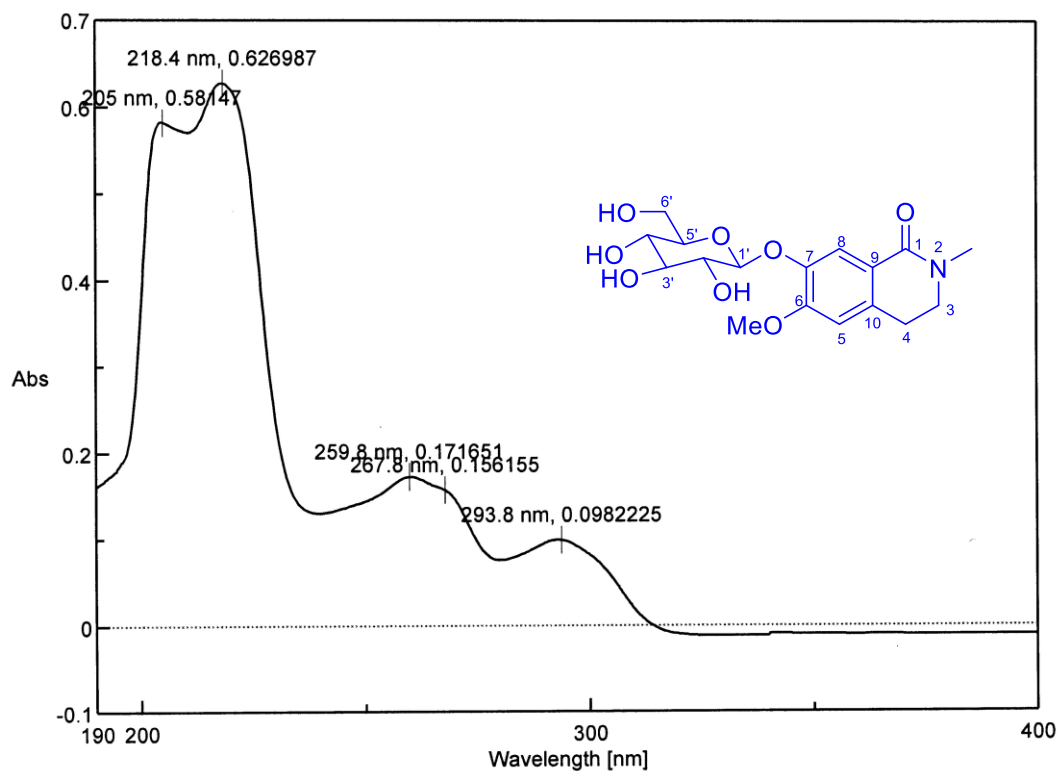

[Comment]  
 Sample Name sij-12  
 Comment 0.02  
 User  
 Division UV  
 Company 324  
 [Measurement Information]  
 Instrument Name V-650  
 Model Name V-650  
 Serial No. A034461150

Accessory PSC-718  
 Accessory S/N A001761114  
 Position 1  
 Cell Length 10 mm  
 Temperature 19.97 C  
 Control Sensor Holder  
 Monitor Sensor Holder  
 Start Mode Start immediately

Photometric Mode Abs  
 Measurement range 400 - 190 nm  
 Data pitch 0.2 nm  
 Band width(UV/Vis) 2.0 nm  
 Response Medium  
 Scanning speed 200 nm/min  
 Source Change 340 nm  
 Light Source D2/WI  
 Filter Exchange Step  
 Correction Baseline

[Data Information]  
 Creation Date 2014-11-18 20:13

Data array type Linear data array  
 Horizontal Wavelength [nm]  
 Vertical Abs  
 Start 400 nm  
 End 190 nm  
 Data pitch 0.2 nm  
 Data points 1051

**Figure S101. The UV Spectrum of Compound 10 in MeOH**

## Qualitative Analysis Report

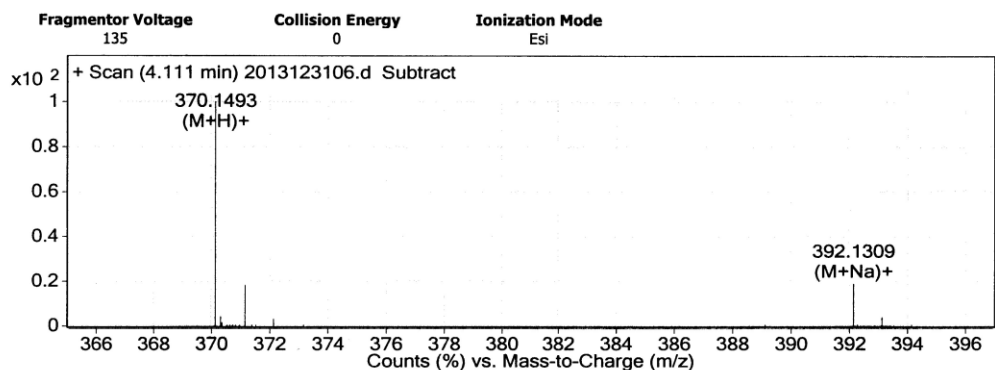

### Peak List

| m/z      | z | Abund  | Formula         | Ion     |
|----------|---|--------|-----------------|---------|
| 370.1493 | 1 | 610997 | C17 H24 N O8    | (M+H)+  |
| 371.1521 | 1 | 113702 | C17 H24 N O8    | (M+H)+  |
| 392.1309 |   | 114552 | C17 H23 N Na O8 | (M+Na)+ |
| 761.2725 | 1 | 277506 |                 |         |
| 762.2752 | 1 | 104815 |                 |         |

### Formula Calculator Element Limits

| Element | Min | Max |
|---------|-----|-----|
| C       | 3   | 100 |
| H       | 0   | 500 |
| O       | 0   | 90  |
| N       | 0   | 5   |
| S       | 0   | 5   |
| Cl      | 0   | 2   |
| Br      | 0   | 0   |
| Si      | 0   | 0   |
| F       | 0   | 0   |
| P       | 0   | 0   |

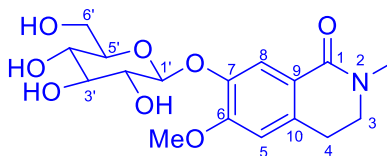

### Formula Calculator Results

| Formula         | Best | Mass     | Tgt Mass | Diff (ppm) | Ion Species        | Score |
|-----------------|------|----------|----------|------------|--------------------|-------|
| C17 H23 N O8    | TRUE | 369.142  | 369.1424 | 1          | C17 H24 N O8       | 99.96 |
| C18 H19 N5 O4   |      | 369.142  | 369.1437 | 4.62       | C18 H20 N5 O4      | 99.34 |
| C21 H23 N O3 S  |      | 369.142  | 369.1399 | -5.78      | C21 H24 N O3 S     | 98.1  |
| C18 H27 N O3 S2 |      | 369.142  | 369.1432 | 3.35       | C18 H28 N O3 S2    | 97.16 |
| C17 H23 N O8    | TRUE | 369.1417 | 369.1424 | 1.8        | C17 H23 N Na O8    | 99.87 |
| C18 H19 N5 O4   |      | 369.1417 | 369.1437 | 5.41       | C18 H19 N5 Na O4   | 99.52 |
| C21 H23 N O3 S  |      | 369.1417 | 369.1399 | -4.98      | C21 H23 N Na O3 S  | 98.83 |
| C18 H27 N O3 S2 |      | 369.1417 | 369.1432 | 4.14       | C18 H27 N Na O3 S2 | 97.32 |

--- End Of Report ---

**Figure S102. The HRESIMS Spectrum of Compound 10**

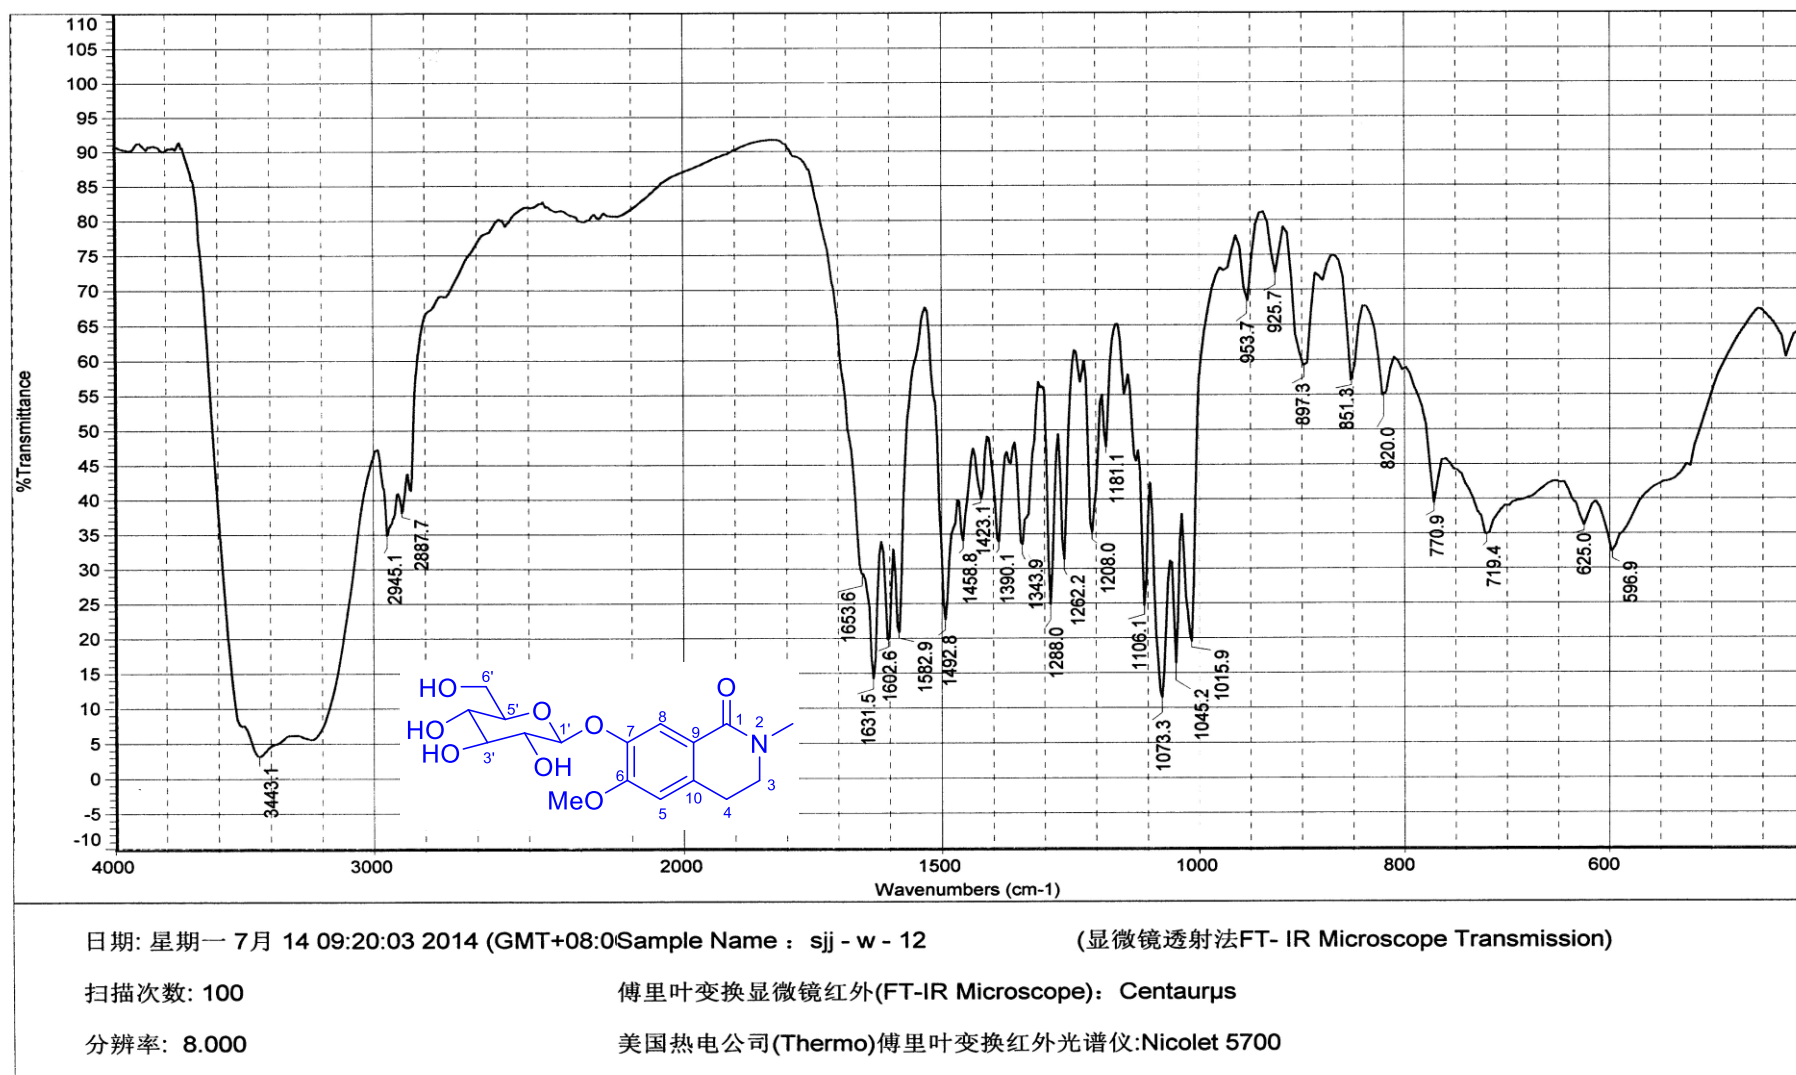

**Figure S103. The IR Spectrum of Compound 10**

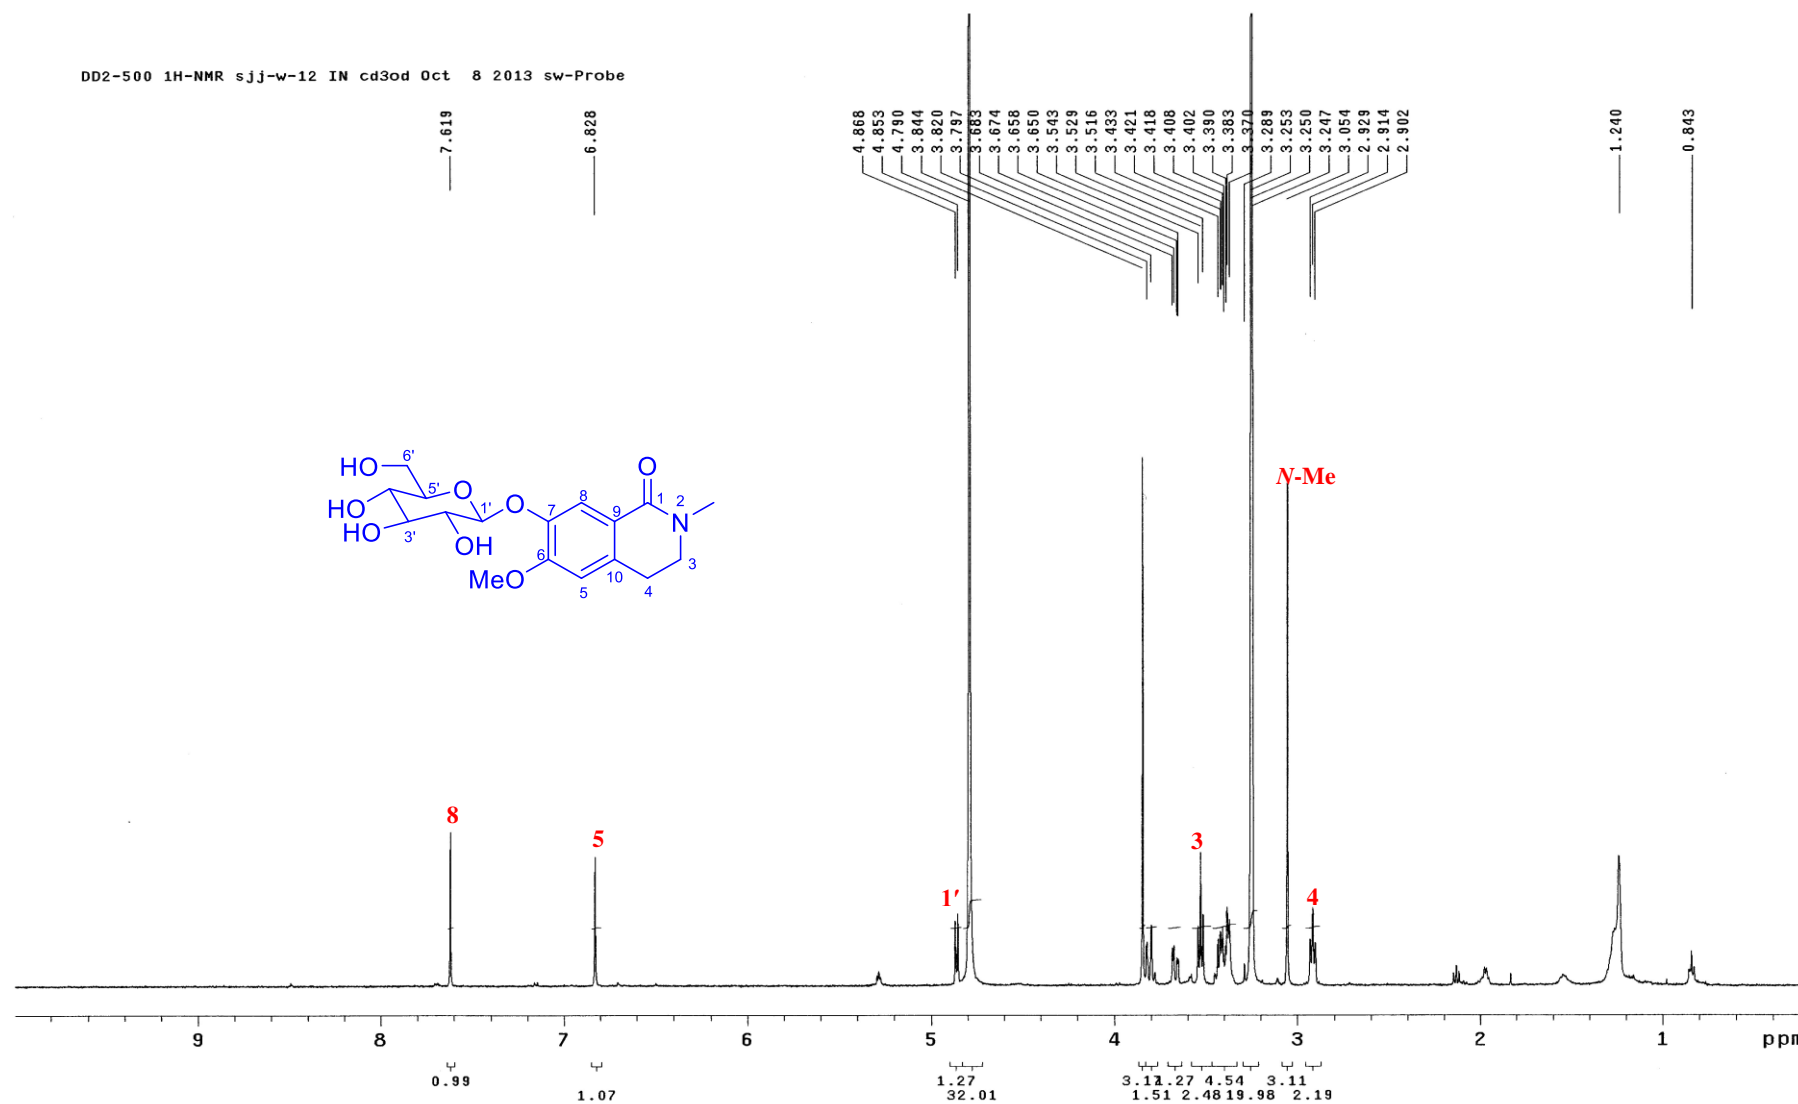

**Figure S104.**The  $^1\text{H}$  NMR Spectrum of Compound 10 in  $\text{MeOH-}d_4$  (500MHz)

DD2-500 13C-NMR sjj-w-12 IN acetone Oct 11 2013 sw-Probe

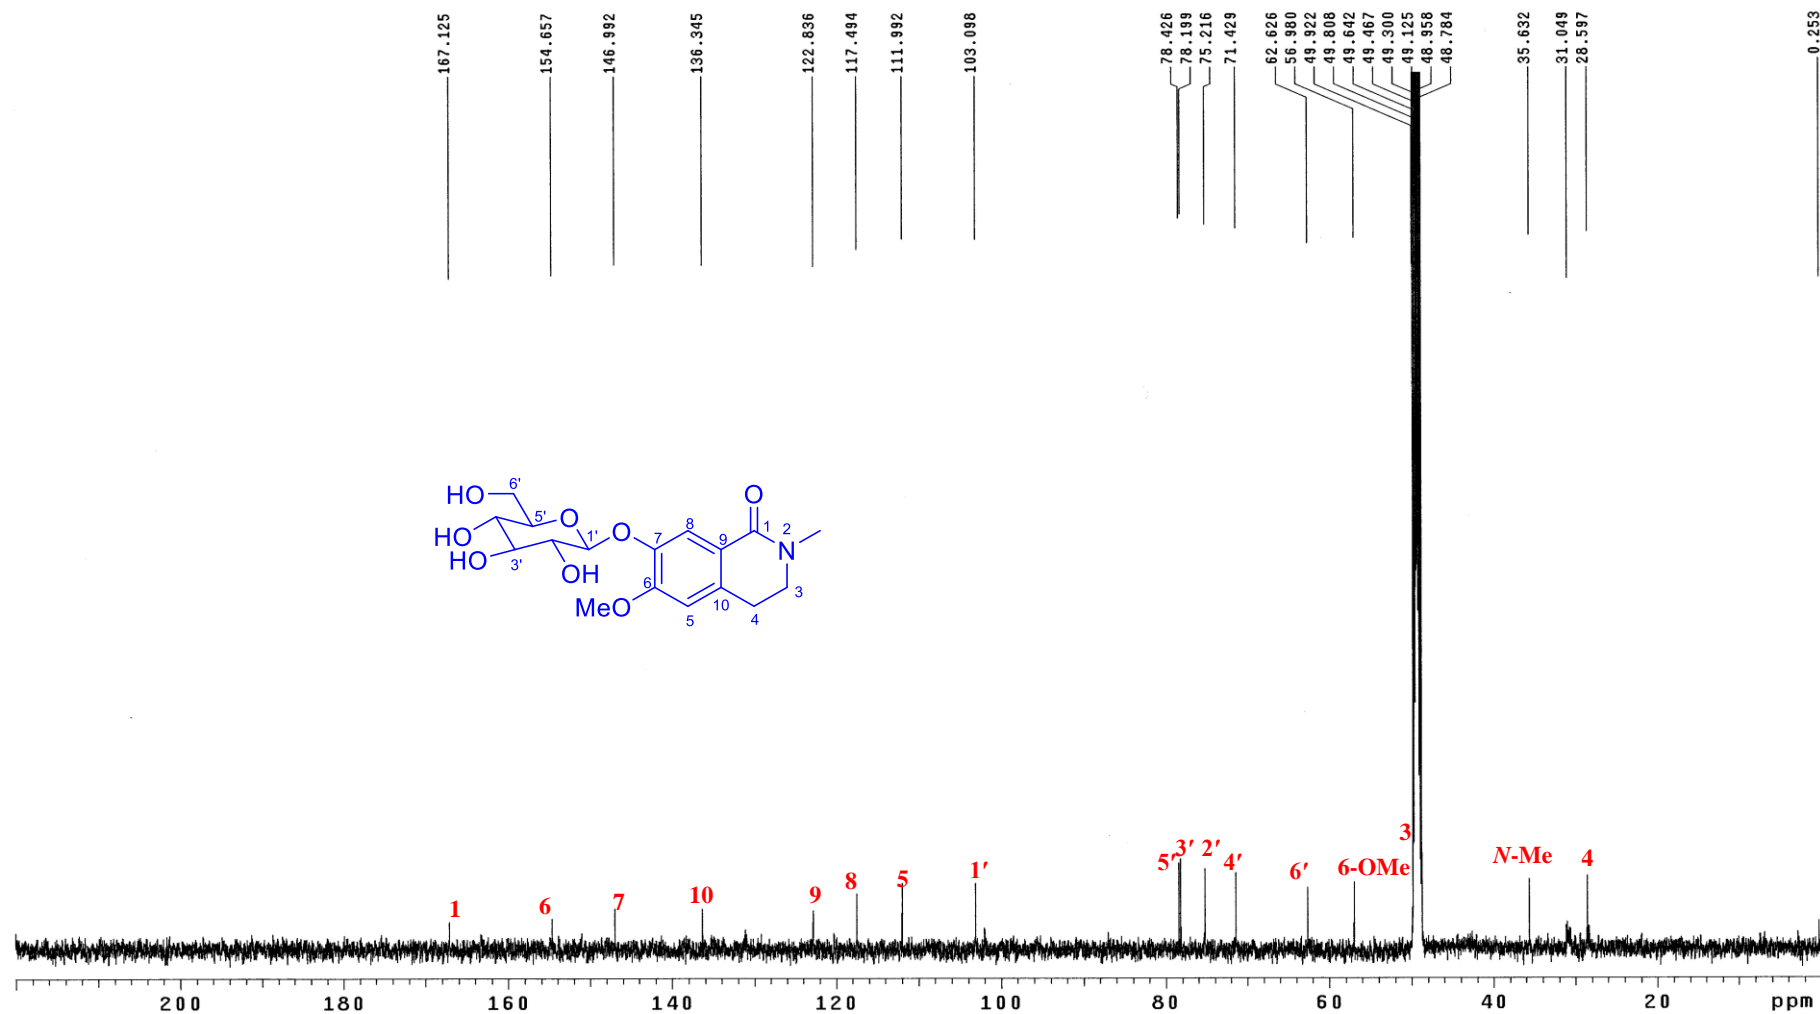

Figure S105. The  $^{13}\text{C}$  NMR Spectrum of Compound 10 in  $\text{MeOH-}d_4$  (500MHz)

DD2-500 gCOSY sjj-w-12 IN cd3od Jan 2 2014 sw

Temp. 25.0 C / 298.1 K  
Sample #10, Operator: vnmr1

Relax. delay 1.000 sec  
Acq. time 0.150 sec  
Width 4845.0 Hz  
2D Width 4845.0 Hz  
4 repetitions  
200 increments  
OBSERVE H1, 499.7694214 MHz  
DATA PROCESSING  
Sq. sine bell 0.075 sec  
F1 DATA PROCESSING  
Sq. sine bell 0.025 sec  
FT size 2048 x 2048  
Total time 16 min

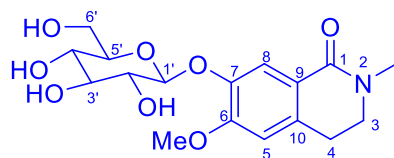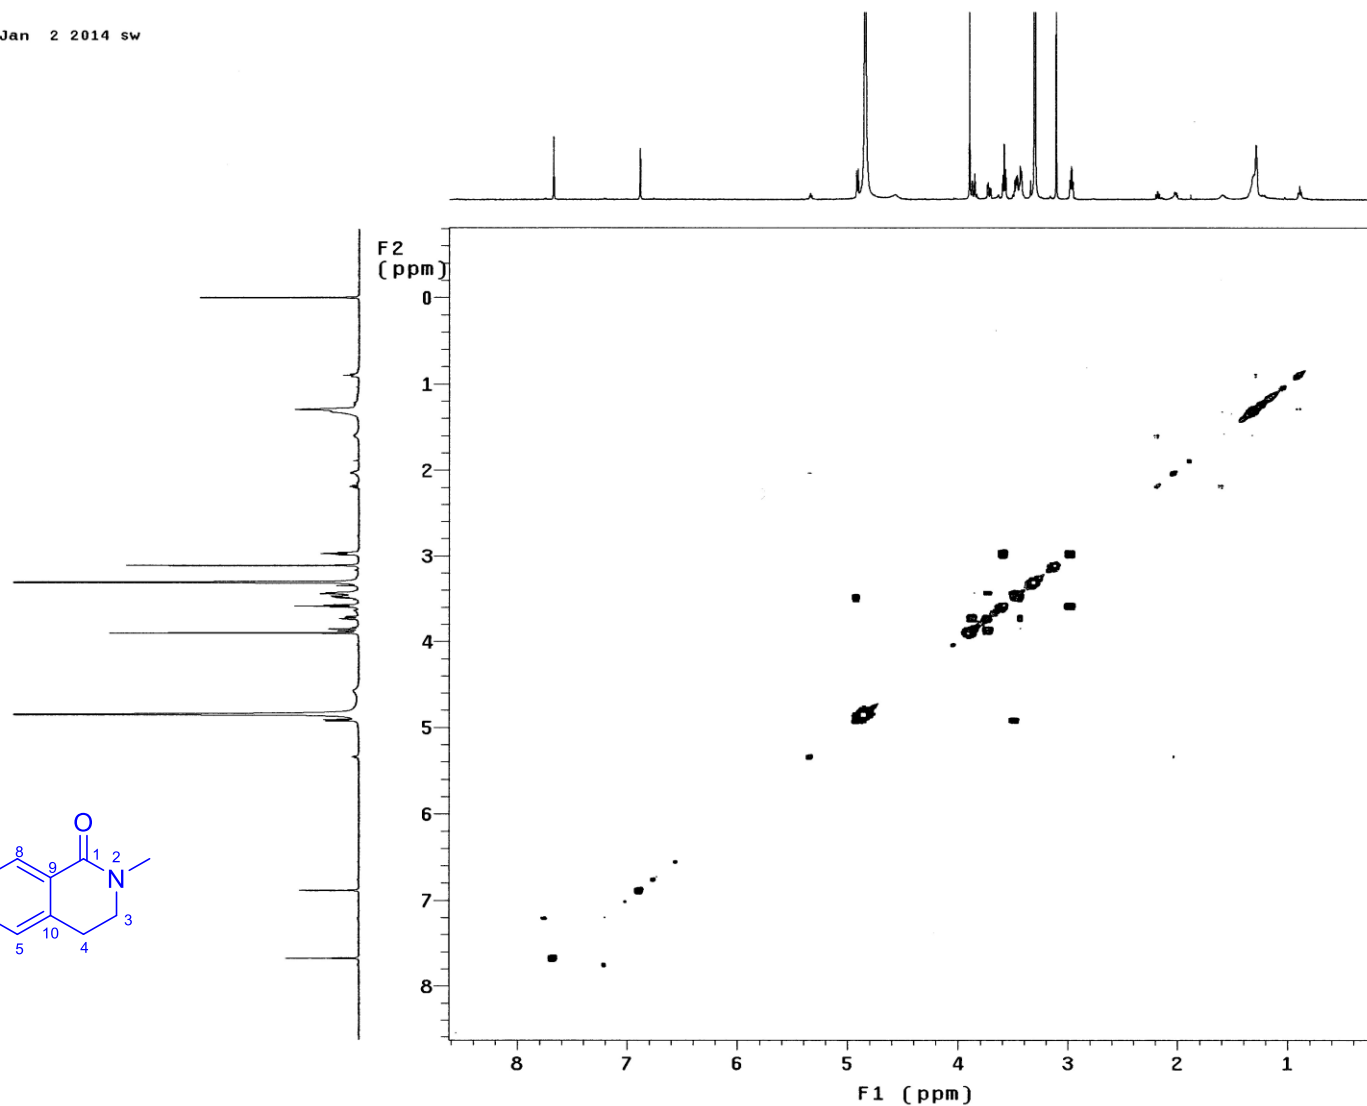

Figure S106. The  $^1\text{H}$ - $^1\text{H}$  COSY Spectrum of Compound 10 in  $\text{MeOH-}d_4$  (500MHz)

Temp. 25.0 C / 298.1 K  
 Sample #10, Operator: vnmr1  
 Relax. delay 1.000 sec  
 Acq. time 0.248 sec  
 Width 4845.0 Hz  
 2D Width 25133.5 Hz  
 16 repetitions  
 2 x 256 increments  
 OBSERVE H1, 499.7694214 MHz  
 DECOUPLE C13, 125.6784310 MHz  
 Power 39 dB  
 on during acquisition  
 off during delay  
 w40\_sw modulated  
 DATA PROCESSING  
 Gauss apodization 0.069 sec  
 F1 DATA PROCESSING  
 Gauss apodization 0.009 sec  
 FT size 4096 x 2048  
 Total time 2 hr, 44 min

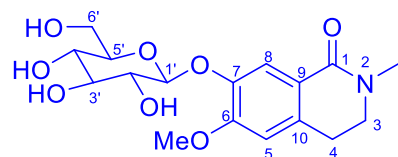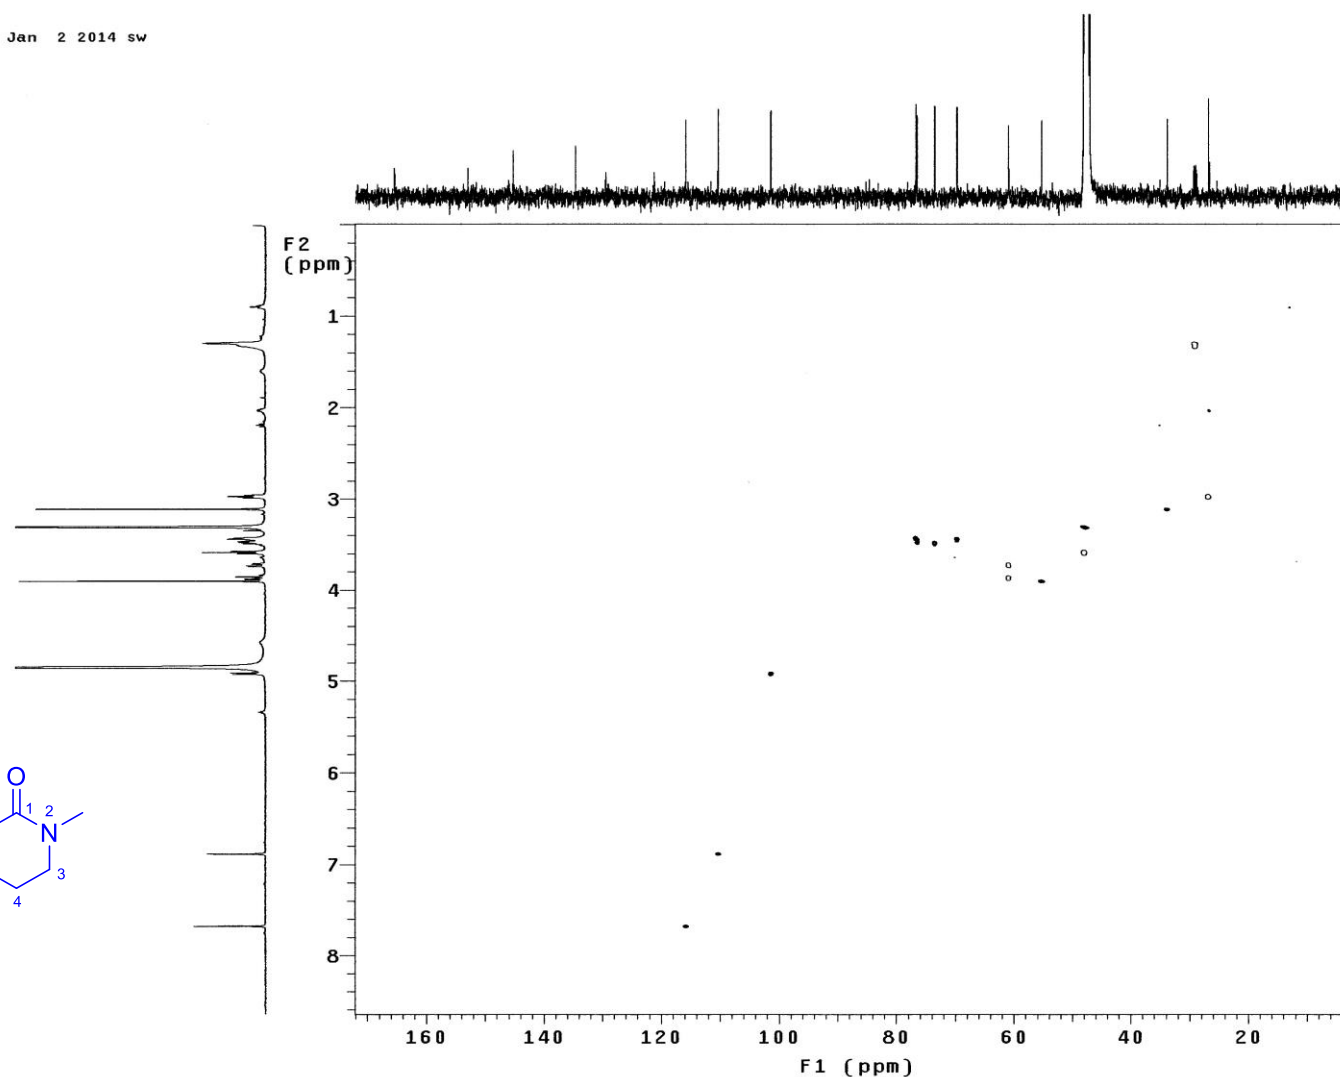

**Figure S107. The HSQC Spectrum of Compound 10 in MeOH-*d*<sub>4</sub> (500MHz)**

DD2-500 gHMCAD sjj-w-12 IN cd3od Dec 27 2013 sw

Temp. 25.0 C / 298.1 K  
Sample #9, Operator: vnmr1

Relax. delay 1.000 sec  
Acq. time 0.246 sec  
Width 4882.8 Hz  
2D Width 30154.5 Hz  
32 repetitions  
2 x 200 increments  
OBSERVE H1, 499.7694214 MHz  
DATA PROCESSING  
Sq. sine bell 0.075 sec  
F1 DATA PROCESSING  
Gauss apodization 0.006 sec  
FT size 4096 x 2048  
Total time 4 hr, 24 min

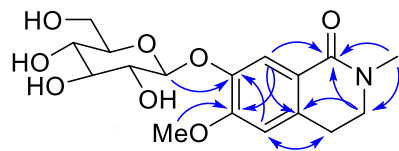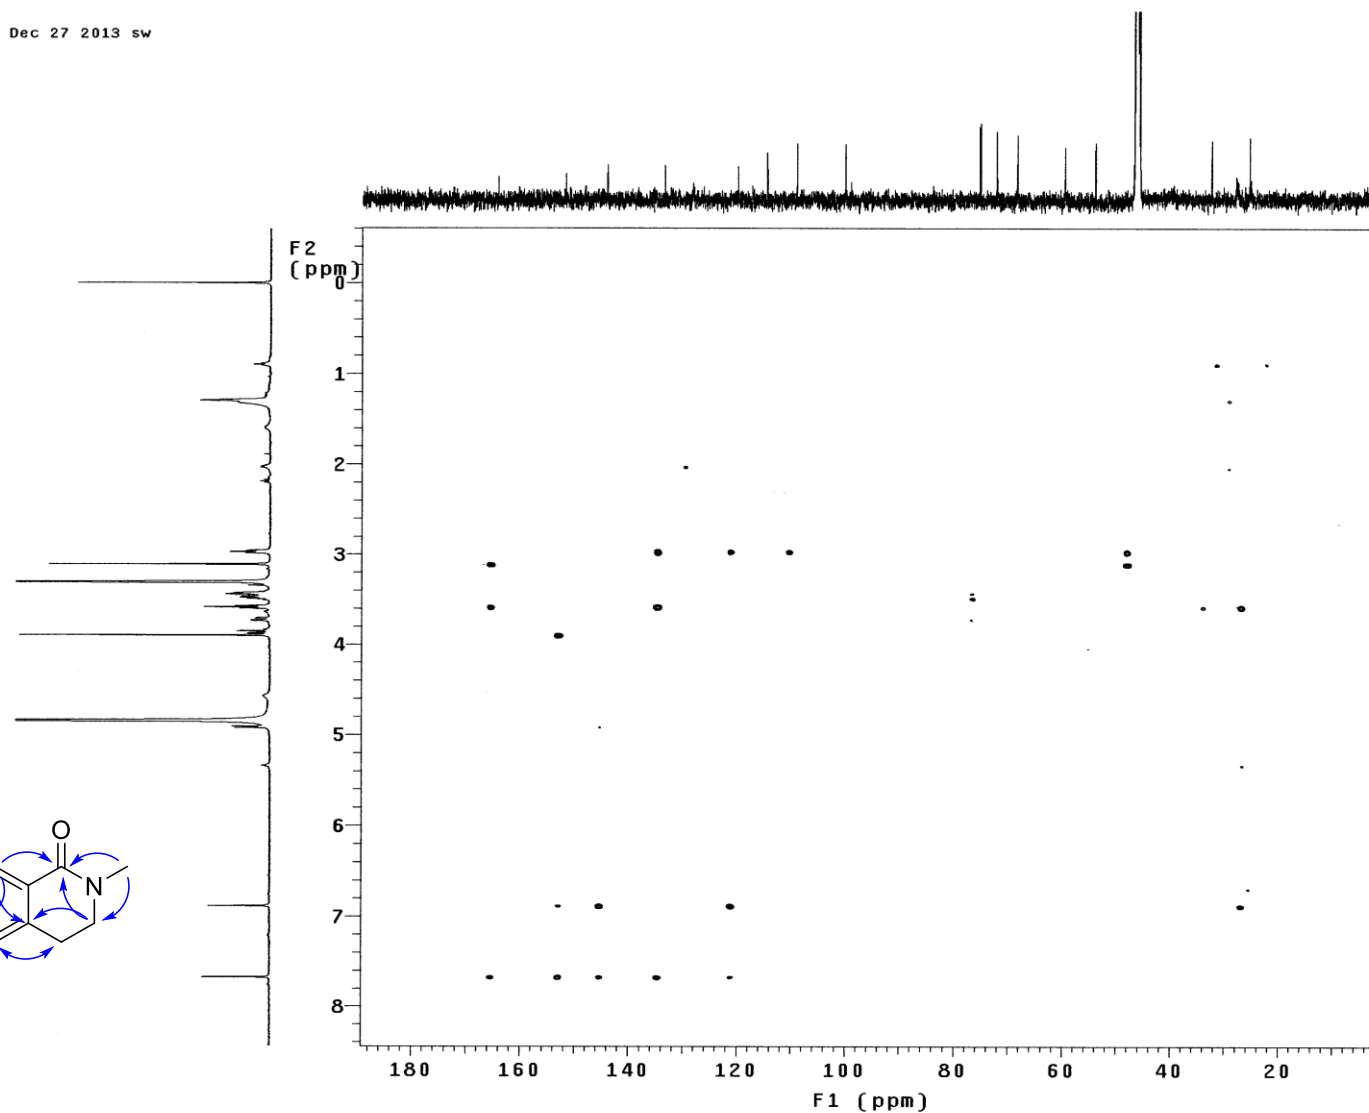

**Figure S108. The HMBC Spectrum of Compound 10 in MeOH- $d_4$  (500MHz)**

DD2-500 NOESY1D sjj-w-12 IN cd3od sw-Probe

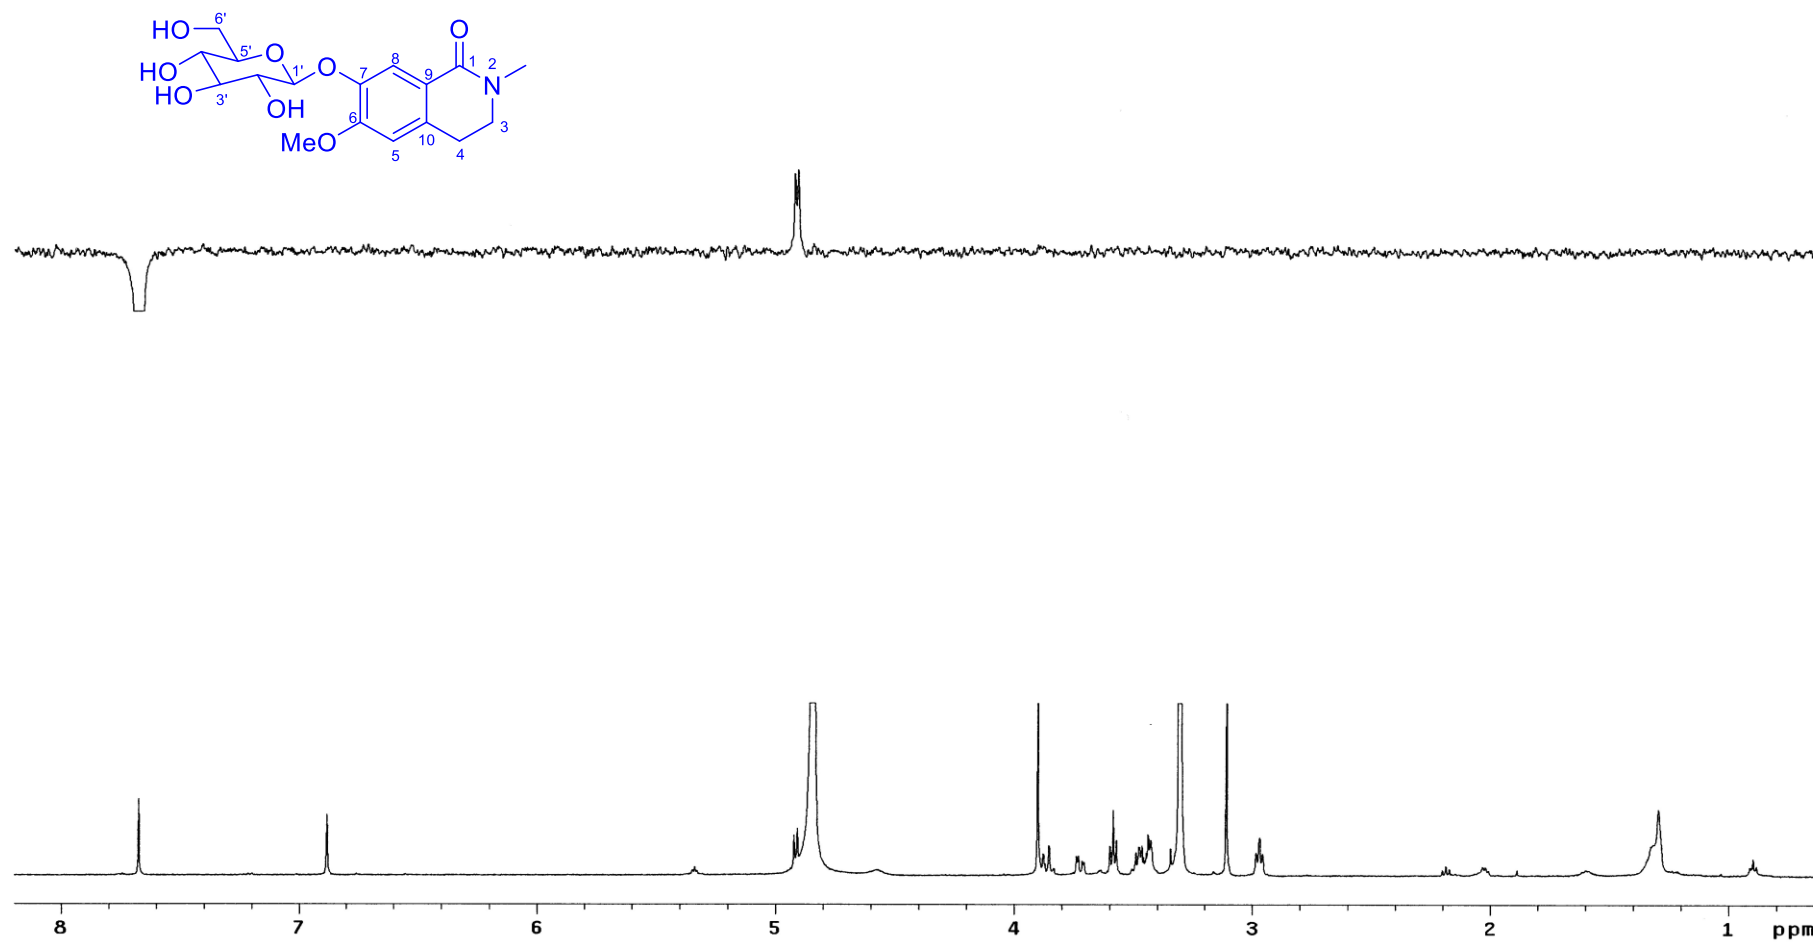

**Figure S109. The NOE Difference Spectrum of Compound 10 in MeOH- $d_4$  (500MHz)**
